# Supplementary material for: Key Predictors and Effectors of Immune Checkpoint Inhibitor-Associated Cardiotoxicity in Lung Cancer: A Large Retrospective Cohort Study
Source: Research Square preprint supplement (doi:10.21203/rs.3.rs-8118907/v1), 2025-12-08
Supplement: Supplementary file 1 [file 2af86984d501b5fb4ea44157.xlsx]

## Sheet: Sheet1
Supplementary Table 1: Baseline characteristics, laboratory tests, and examination findings of the 1633 patients.
Abbreviation
plr	Platelet-to-Lymphocyte Ratio
nlr	Neutrophil-to-Lymphocyte Ratio
lmr	Lymphocyte-to-Monocyte Ratio
SCLC	Small Cell Lung Carcinoma
NETs	Pulmonary Neuroendocrine Tumors
NSCLC	Non-Small Cell Lung Cancer
SCC	Squamous Cell Carcinoma
LCC	Large Cell Carcinoma
ICI	Immune Checkpoint Inhibitor
Endostar	Recombinant human endostatin injection

## Sheet: Sheet2
patient_id	patient_SN	pathological_type	status	grade	cardiotoxicity_type	time_weeks	new_onset_arrhythmia	new_onset_arrhythmia	gender	age	weight	height	bmi	smoking	drinking	metastasis	treatment_plan	ici_type	ici_target	chemotherapy	pemetrexed	paclitaxel	gemcitabine	etoposide	irinotecan	cisplatin	nedaplatin	carboplatin	targeted_therapy	icotinib	osimertinib	aumolertinib	antiangiogenic_therapy	bevacizumab	anlotinib	endostar	diabetes	hypertension	stroke	platelet	hemoglobin	white_blood_cell	monocyte	lymphocyte	lymphocyte_percentage	neutrophil	neutrophil_percentage	plr	nlr
1001221771	ad71e264175bdfaf8328ca0e558a00c4	SCC	0	0	no	127.571	0	no	female	66	55	169	19.257	0	0	0	ICI+chemotherapy	Sintilimab	PD-1	1	1	0	0	0	0	1	0	0	0	0	0	0	0	0	0	0	0	1	0	456	121	7.66	0.72	1.63	0.212794	5.18	0.67624	279.755	3.17791
1001413386	9277bfd6d67beb1c612559a1a0267840	SCC	0	0	no	82.5714	0	no	male	57	77	173	25.7276	0	0	0	ICI+chemotherapy	Tislelizumab	PD-1	1	0	0	0	0	1	1	0	0	0	0	0	0	0	0	0	0	0	0	0	179	123	3.49	0.36	0.65	0.186246	2.29	0.65616	275.385	3.52308
1001415305	7f389bf3fc4ea14972068e3e9b847e51	SCC	0	0	no	83.4286	0	no	male	66	49	173	16.3721	1	0	0	ICI+chemotherapy	Durvalumab	PD-L1	1	0	0	0	1	0	0	1	0	0	0	0	0	0	0	0	0	0	1	0	152	115	7.9	0.57	1.57	0.198734	5.71	0.722785	96.8153	3.63694
1001440310	04520470d867aa4965a92baa2f5016ab	adenocarcinoma	1	1	Arrhythmia	16	1	T-wave Abnormality	female	54	48	153	20.5049	0	0	0	ICI+chemotherapy+antiangiogenic_therapy	Durvalumab	PD-L1	1	0	1	0	0	0	0	1	0	0	0	0	0	1	0	1	0	0	0	0	109	145	3.68	0.24	1.4	0.380435	1.91	0.519022	77.8571	1.36429
1001503028	4052c74b7d146b99faedef2a5f033955	adenocarcinoma	0	0	no	108.429	0	no	male	52	78	170	26.9896	0	0	0	ICI+chemotherapy	Tislelizumab	PD-1	1	0	1	0	0	0	0	0	0	0	0	0	0	0	0	0	0	0	0	0	153	128	4.8	0.32	1.54	0.320833	2.82	0.5875	99.3506	1.83117
1001530929	c43c93c7f0492e4ce15065b052c5eb30	adenocarcinoma	0	0	no	120.429	0	no	female	82	73	156	29.7913	0	0	0	ICI+chemotherapy	Camilizumab	PD-1	1	1	0	0	0	0	0	0	1	0	0	0	0	0	0	0	0	0	0	0	168	101	5.36	0.76	1.13	0.210821	3.23	0.602612	148.673	2.85841
1001624793	f09cd38c0c26e115946bcd9f8e502cd1	adenocarcinoma	0	0	no	132.714	0	no	female	63	60	156	24.6548	0	0	0	ICI	Tislelizumab	PD-1	0	0	0	0	0	0	0	0	0	0	0	0	0	0	0	0	0	0	0	0	189	116	3.96	0.48	0.76	0.191919	2.69	0.679293	248.684	3.53947
1001638022	d7f2343b3af3bc7d854fc70fa100df56	adenocarcinoma	0	0	no	237.571	0	no	male	77	65	168	23.03	1	0	0	ICI+chemotherapy	Pembrolizumab	PD-1	1	1	1	0	0	0	0	1	1	0	0	0	0	0	0	0	0	0	0	0	186	126	7.46	0.58	1.92	0.257373	4.6	0.616622	96.875	2.39583
1001669252	7ebe4b441a4844c9288d0fc0fd9a9db6	adenocarcinoma	0	0	no	110.857	0	no	male	68	70	164	26.0262	1	1	0	ICI+chemotherapy+antiangiogenic_therapy	Durvalumab	PD-L1	1	0	1	0	0	1	0	0	0	0	0	0	0	1	0	1	0	0	0	0	205	89	5.28	0.44	0.9	0.170455	3.85	0.729167	227.778	4.27778
1001778251	42eba5a4872c4b9e6a5da4ffadd2e4ef	SCC	0	0	no	217	0	no	male	69	70	171	23.939	1	0	0	ICI	Pembrolizumab	PD-1	0	0	0	0	0	0	0	0	0	0	0	0	0	0	0	0	0	0	0	0	241	129	4.92	0.6	1.01	0.205285	3.23	0.656504	238.614	3.19802
1001960886	de77138f913aa0afb55914a2cb61fda9	adenocarcinoma	0	0	no	234.571	0	no	male	63	70	171	23.939	1	0	0	ICI+chemotherapy	Pembrolizumab	PD-1	1	0	1	0	0	0	0	0	0	0	0	0	0	0	0	0	0	0	0	0	211	108	4.91	0.27	0.67	0.136456	3.84	0.782077	314.925	5.73134
1001973595	0abd7463496d623801aaf80dd7f27735	SCC	0	0	no	152.857	0	no	male	79	60	165	22.0386	1	0	0	ICI+chemotherapy+antiangiogenic_therapy	Tislelizumab	PD-1	1	0	1	0	0	0	0	0	0	0	0	0	0	1	0	0	1	0	0	0	263	104	4.75	0.39	1.64	0.345263	2.55	0.536842	160.366	1.55488
1002417008	9c5fd8fd0e3dfb4e1a1e407ef24f6f53	adenocarcinoma	0	0	no	50.5714	0	no	female	60	61	164	22.68	1	0	0	ICI	Durvalumab	PD-L1	0	0	0	0	0	0	0	0	0	0	0	0	0	0	0	0	0	0	1	0	124	118	3.08	0.43	0.68	0.220779	1.89	0.613636	182.353	2.77941
1002632671	f6d8a5c20aeae99e9fe5de632fe102b3	SCC	1	1	Arrhythmia	17	1	Right Bundle Branch Block (RBBB)	male	57	73	172	24.6755	1	1	1	ICI	Pembrolizumab	PD-1	0	0	0	0	0	0	0	0	0	0	0	0	0	0	0	0	0	0	0	0	244	158	8.86	0.5	0.85	0.0959368	7.07	0.797968	287.059	8.31765
1002723954	f0989145b730cde77cec9e15b6a30f8d	SCC	0	0	no	118.714	0	no	female	61	60	159	23.7332	0	0	0	ICI+chemotherapy+antiangiogenic_therapy	Tislelizumab	PD-1	1	0	1	0	0	0	0	0	0	0	0	0	0	1	0	1	0	0	0	0	159	107	3.54	0.35	1.53	0.432203	1.44	0.40678	103.922	0.941176
1002773007	7c58664b1a8e88f978c12d77ecb2bf41	adenocarcinoma	0	0	no	127.714	0	no	male	75	64	165	23.5078	1	1	1	ICI+chemotherapy	Pembrolizumab	PD-1	1	1	0	0	0	0	0	0	1	0	0	0	0	0	0	0	0	0	0	0	243	123	10.42	0.9	1.72	0.165067	5.2	0.49904	141.279	3.02326
1003015282	2324c5a9c1d4f2bb072f4d10a77ba1bd	adenocarcinoma	0	0	no	169.714	0	no	male	53	72	165	26.4463	1	1	1	ICI+chemotherapy+antiangiogenic_therapy	Tislelizumab	PD-1	1	1	0	0	0	0	1	0	0	0	0	0	0	1	1	0	0	0	0	0	240	130	5.74	0.53	1.24	0.216028	3.67	0.639373	193.548	2.95968
1003034446	87d2e5c27150881c9a6feed8ccb0cd96	SCC	0	0	no	170.143	0	no	male	66	50	164	18.5901	1	1	0	ICI+chemotherapy	Camilizumab	PD-1	1	0	0	0	0	0	0	1	0	0	0	0	0	0	0	0	0	0	0	0	295	107	7.73	0.75	0.77	0.0996119	6.08	0.786546	383.117	7.8961
1003150883	513ce0f65d51ebe2cccb236714ea79f4	adenocarcinoma	0	0	no	117.143	0	no	male	72	84	177	26.8122	1	1	0	ICI+chemotherapy	Tislelizumab	PD-1	1	1	1	0	0	0	0	1	0	0	0	0	0	0	0	0	0	0	0	0	159	147	6.22	0.58	1.75	0.28135	3.46	0.55627	90.8571	1.97714
1003810925	ad144dc8c4a62466c8cabece2b47d10f	SCC	0	0	no	182.714	0	no	male	68	60	157	24.3418	1	0	0	ICI+chemotherapy	Pembrolizumab	PD-1	1	0	0	0	0	0	0	1	0	0	0	0	0	0	0	0	0	0	0	0	256	151	10.09	0.67	1.33	0.131814	8.02	0.794846	192.481	6.03008
1003879046	3eb9713e38147e935707d3bbca751150	adenocarcinoma	0	0	no	81.1429	0	no	male	70	63	168	22.3214	1	1	0	ICI+chemotherapy	Tislelizumab	PD-1	1	1	0	0	0	0	1	0	0	0	0	0	0	0	0	0	0	0	0	0	223	106	7.62	1.01	1.12	0.146982	5.17	0.678478	199.107	4.61607
1003917498	5b8a8d8c33c2603d4bc8e264b921ec30	SCLC	1	1	Arrhythmia	6	1	ST-Segment Change	female	36	60	165	22.0386	0	0	0	ICI	Pembrolizumab	PD-1	0	0	0	0	0	0	0	0	0	0	0	0	0	0	0	0	0	0	0	0	411	137	6.22	0.63	1.03	0.165595	4.45	0.715434	399.029	4.32039
1003960521	31ae4b5e9e178a624bf2be716a9465b8	SCLC	0	0	no	140.143	0	no	male	68	55	172	18.5911	1	1	0	ICI+chemotherapy	Pembrolizumab	PD-1	1	0	1	0	0	0	0	1	0	0	0	0	0	0	0	0	0	0	0	0	288	109	2.34	0.56	1.18	0.504274	0.5	0.213675	244.068	0.423729
1003970480	dd7c871d3c8126ebf015d42797dd64d4	SCC	0	0	no	112.714	0	no	male	57	79	173	26.3958	0	0	0	ICI+antiangiogenic_therapy	Sintilimab	PD-1	0	0	0	0	0	0	0	0	0	0	0	0	0	1	0	0	1	0	0	0	193	169	6.07	0.41	1.47	0.242175	3.94	0.649094	131.293	2.68027
1004191215	847754a99e24a4d6b0ff4318f49f895b	adenocarcinoma	0	0	no	232.714	0	no	male	53	68	166	24.677	0	0	0	ICI	Pembrolizumab	PD-1	0	0	0	0	0	0	0	0	0	0	0	0	0	0	0	0	0	0	0	0	301	109	7.34	0.9	0.66	0.0899183	5.53	0.753406	456.061	8.37879
1004208592	4dbb8d651ff1f0730eae44999495d195	adenocarcinoma	0	0	no	192.571	0	no	male	73	71	173	23.7228	1	0	0	ICI+chemotherapy+antiangiogenic_therapy	Pembrolizumab	PD-1	1	0	1	0	0	0	0	0	0	0	0	0	0	1	1	0	0	0	1	0	180	166	7.75	0.6	2.24	0.289032	4.61	0.594839	80.3571	2.05804
1004478322	1023e3a40a0187a331891e4e2d0dd42c	adenocarcinoma	0	0	no	186.714	0	no	female	69	50	162	19.052	0	0	0	ICI	Camilizumab	PD-1	0	0	0	0	0	0	0	0	0	0	0	0	0	0	0	0	0	0	0	0	220	138	6.7	0.39	2.35	0.350746	3.71	0.553731	93.617	1.57872
1004514473	fc837d99273352974436930b114eaef8	adenocarcinoma	0	0	no	158.714	0	no	female	67	65	168	23.03	1	1	0	ICI+antiangiogenic_therapy	Pembrolizumab	PD-1	0	0	0	0	0	0	0	0	0	0	0	0	0	1	0	1	0	0	0	0	312	120	5.14	0.46	2.68	0.521401	1.93	0.375486	116.418	0.720149
1004646838	bb5221c76b94b97a186269eaa87cdf50	SCC	0	0	no	176.857	0	no	male	56	63	164	23.4236	0	1	0	ICI+chemotherapy	Sintilimab	PD-1	1	0	1	0	0	0	0	0	0	0	0	0	0	0	0	0	0	0	0	0	253	159	3.83	0.35	1.93	0.503916	5.37	1.40209	131.088	2.78238
1004741120	7bfdb1ffca94b3cac18307a024057c3b	adenocarcinoma	0	0	no	250.286	0	no	male	69	51	165	18.7328	1	0	0	ICI+chemotherapy+antiangiogenic_therapy	Pembrolizumab	PD-1	1	0	1	0	0	0	0	0	0	0	0	0	0	1	1	1	0	0	0	0	161	127	5.23	0.41	2.69	0.51434	5.23	1	59.8513	1.94424
1004912572	503cfd467682da486adf959492d999f5	adenocarcinoma	1	1	Myocarditis	8	0	no	male	74	70	173	23.3887	1	1	0	ICI	Camilizumab	PD-1	0	0	0	0	0	0	0	0	0	0	0	0	0	0	0	0	0	0	0	0	258	136	5.3	0.52	1.37	0.258491	3.32	0.626415	188.321	2.42336
1004971601	52c12df8890630ecab0149c0c41ad8b3	adenocarcinoma	0	0	no	122.143	0	no	male	72	70	160	27.3438	1	1	0	ICI+chemotherapy	Pembrolizumab	PD-1	1	0	1	0	0	0	1	0	0	0	0	0	0	0	0	0	0	0	0	0	182	98	2.86	0.07	0.94	0.328671	1.78	0.622378	193.617	1.89362
1004972053	9539cebb791476502e4519460f12fbc3	adenocarcinoma	0	0	no	126.857	0	no	female	57	48	156	19.7239	0	0	0	ICI+chemotherapy+antiangiogenic_therapy	Camilizumab	PD-1	1	0	1	0	0	0	1	1	0	0	0	0	0	1	1	0	0	1	0	0	197	150	4.54	0.34	1.22	0.268722	2.88	0.634361	161.475	2.36066
1005010934	363a4d86259821cec666c3684c04a671	adenocarcinoma	0	0	no	138.143	0	no	male	76	50	158	20.0288	1	0	0	ICI	Sintilimab	PD-1	0	0	0	0	0	0	0	0	0	0	0	0	0	0	0	0	0	1	1	0	220	132	5.28	0.5	1.11	0.210227	3.46	0.655303	198.198	3.11712
1005036960	15122cd0cedc752e41cf6b204be4968a	SCLC	0	0	no	149.857	0	no	male	66	69	167	24.7409	1	1	0	ICI+chemotherapy	Tislelizumab	PD-1	1	0	0	0	1	0	0	0	1	0	0	0	0	0	0	0	0	0	1	1	277	130	4.76	0.47	0.94	0.197479	3.06	0.642857	294.681	3.25532
1005080531	2899bb261a920ac0fc821c57298528c2	SCC	0	0	no	31	0	no	female	70	36	151	15.7888	0	0	0	ICI+chemotherapy+antiangiogenic_therapy	Sintilimab	PD-1	1	0	1	0	0	0	0	0	0	0	0	0	0	1	1	0	0	0	0	0	306	73	10.45	0.46	0.83	0.0794258	9.07	0.867943	368.675	10.9277
1005103650	b5b02ed7e2c5af264067b6cf3004749d	adenocarcinoma	0	0	no	144.571	0	no	male	57	75	173	25.0593	0	0	0	ICI+chemotherapy	Tislelizumab	PD-1	1	1	0	0	0	0	0	1	0	0	0	0	0	0	0	0	0	0	0	0	178	92	11.71	0.72	1.46	0.12468	9.23	0.788215	121.918	6.32192
1005108994	6426e18cf9e5af6fa80b07360009e5f1	adenocarcinoma	1	2	Myocarditis	38	0	no	male	63	75	172	25.3515	1	1	0	ICI+chemotherapy+antiangiogenic_therapy	Pembrolizumab	PD-1	1	1	0	0	0	0	0	1	0	0	0	0	0	1	0	1	0	0	0	0	448	92	8.82	1.56	1.63	0.184807	5.49	0.622449	274.847	3.3681
1005165270	da913f4e665979a68889b6549f61d17b	adenocarcinoma	0	0	no	241.714	0	no	female	61	62	162	23.6244	0	0	0	ICI	Pembrolizumab	PD-1	0	0	0	0	0	0	0	0	0	0	0	0	0	0	0	0	0	0	1	0	197	134	5.22	0.42	0.96	0.183908	3.74	0.716475	205.208	3.89583
1005334013	d14f5b01c6f3e647434aadf5dcd8b668	SCLC	0	0	no	78	0	no	female	71	40	151	17.5431	0	0	0	ICI	Tislelizumab	PD-1	0	0	0	0	0	0	0	0	0	0	0	0	0	0	0	0	0	0	0	0	244	156	5.57	0.31	1.28	0.229803	3.85	0.691203	190.625	3.00781
1005390237	d9bd072c8424c5a5b5ded96abd9d97c6	adenocarcinoma	0	0	no	128.429	0	no	male	64	72	172	24.3375	1	0	0	ICI+chemotherapy	Tislelizumab	PD-1	1	0	0	0	0	0	0	1	0	0	0	0	0	0	0	0	0	0	0	0	278	122	4.96	0.27	0.59	0.118952	3.94	0.794355	471.186	6.67797
1005390437	bc0a831a52983b7fbbc4e45986dc4f29	SCC	0	0	no	245.286	0	no	female	50	59	167	21.1553	0	0	0	ICI+chemotherapy	Pembrolizumab	PD-1	1	1	0	0	0	0	0	0	0	0	0	0	0	0	0	0	0	0	0	0	215	129	4.86	0.38	0.65	0.133745	3.77	0.77572	330.769	5.8
1005407494	5f4dabd48507b75abcd9d3f14291319b	SCC	0	0	no	146.857	0	no	male	69	46	150	20.4444	1	0	0	ICI+chemotherapy	Camilizumab	PD-1	1	1	0	0	0	0	0	0	1	0	0	0	0	0	0	0	0	0	0	0	239	135	7.48	0.28	0.62	0.0828877	6.54	0.874332	385.484	10.5484
1005517405	de07cd78e6a96a0202e8cfd6cb0e6d3d	SCC	0	0	no	173.857	0	no	male	67	87	174	28.7356	1	0	0	ICI	Pembrolizumab	PD-1	0	0	0	0	0	0	0	0	0	0	0	0	0	0	0	0	0	0	1	0	171	122	8.4	0.65	1.25	0.14881	6.49	0.772619	136.8	5.192
1005539487	f28da528067f690f495c14aa017d1f97	adenocarcinoma	0	0	no	40.4286	0	no	male	61	65	169	22.7583	0	0	0	ICI+chemotherapy	Toripalimab	PD-1	1	0	1	0	0	0	0	0	0	0	0	0	0	0	0	0	0	0	0	0	223	102	5.71	0.69	0.89	0.155867	3.88	0.67951	250.562	4.35955
1005690603	a46591e2a6906413bbd0dd894763f740	adenocarcinoma	0	0	no	81.7143	0	no	female	70	48	153	20.5049	0	0	0	ICI+chemotherapy+antiangiogenic_therapy	Sintilimab	PD-1	1	0	0	1	0	0	1	1	0	0	0	0	0	1	0	0	1	0	0	0	238	99	12.17	0.99	1.18	0.0969597	9.99	0.820871	201.695	8.4661
1005698981	0649935b0b02a6c8e19fbb52053dfed8	SCC	0	0	no	91.8571	0	no	male	74	53	157	21.299	1	0	0	ICI+chemotherapy	Sintilimab	PD-1	1	0	0	1	0	0	0	1	0	0	0	0	0	0	0	0	0	0	1	0	166	120	2.68	0.33	0.92	0.343284	1.34	0.5	180.435	1.45652
1005725418	ef0db46781d51fd276b4fbc940edb14c	adenocarcinoma	0	0	no	94.2857	0	no	male	73	53	162	20.1951	1	1	0	ICI+chemotherapy	Pembrolizumab	PD-1	1	1	0	0	0	0	0	0	0	0	0	0	0	0	0	0	0	0	0	0	696	91	6.77	0.62	1.61	0.237814	4.48	0.661743	432.298	2.78261
1005739422	de5bbed55ca7d3123f8738717ea9ae67	adenocarcinoma	0	0	no	135.714	0	no	female	47	60	161	23.1473	0	0	0	ICI	Camilizumab	PD-1	0	0	0	0	0	0	0	0	0	0	0	0	0	0	0	0	0	0	0	1	209	116	5.78	0.49	1.1	0.190311	4.13	0.714533	190	3.75455
1005760732	2e20ecca98cfd8c8704e92b7e48ca355	adenocarcinoma	0	0	no	236.857	0	no	female	53	66	164	24.539	1	1	1	ICI+chemotherapy	Pembrolizumab	PD-1	1	0	1	0	0	0	0	0	0	0	0	0	0	0	0	0	0	0	0	0	245	100	5.78	0.58	2	0.346021	3.07	0.531142	122.5	1.535
1005986392	f0c07cb6bbff3bf9509ee5eea7ba976d	SCC	0	0	no	53.5714	0	no	male	91	73	165	26.8136	1	0	0	ICI	Pembrolizumab	PD-1	0	0	0	0	0	0	0	0	0	0	0	0	0	0	0	0	0	0	1	1	263	98	6.97	0.85	0.87	0.124821	4.91	0.704448	302.299	5.64368
1005989317	e48209c205904b988336455fbeba3632	SCC	0	0	no	161	0	no	female	60	62	160	24.2188	0	0	0	ICI+chemotherapy	Camilizumab	PD-1	1	0	1	0	1	0	0	1	0	0	0	0	0	0	0	0	0	0	0	0	218	119	5.11	0.75	1.11	0.217221	3.22	0.630137	196.396	2.9009
1005994036	40e5097f3b4fc8a47ed0273a3e36cca1	adenocarcinoma	0	0	no	126.429	0	no	male	63	64	164	23.7954	1	1	0	ICI+chemotherapy+antiangiogenic_therapy	Camilizumab	PD-1	1	1	0	0	0	0	0	1	0	0	0	0	0	1	1	0	0	0	0	0	359	123	8.95	0.69	2.34	0.261453	5.45	0.608939	153.419	2.32906
1006022557	3ed8c254c1413dfcfd01261c17e285cf	adenocarcinoma	0	0	no	242.857	0	no	male	58	49	170	17.0934	1	1	0	ICI	Sintilimab	PD-1	0	0	0	0	0	0	0	0	0	0	0	0	0	0	0	0	0	0	0	0	167	143	3.7	0.47	0.83	0.224324	2.3	0.621622	201.205	2.77108
1006050392	f27e6a036738f3275ff49572ae40e61e	adenocarcinoma	1	1	Myocarditis	84	0	no	male	64	80	170	27.6817	1	1	0	ICI+chemotherapy+antiangiogenic_therapy	Atezolizumab	PD-L1	1	0	0	0	1	0	0	1	0	0	0	0	0	1	0	1	0	0	0	0	160	133	4.48	0.25	1.86	0.415179	2.26	0.504464	86.0215	1.21505
1006061780	bf3e826ae158aba67a42aa205be55a62	adenocarcinoma	0	0	no	159	0	no	male	60	79	172	26.7036	1	1	0	ICI+chemotherapy	Pembrolizumab	PD-1	1	1	0	0	0	0	1	0	0	0	0	0	0	0	0	0	0	0	0	0	235	153	36.15	2.49	2.67	0.0738589	23.91	0.661411	88.015	8.95506
1006106928	1d169658db09232c249ae7a05ddb940c	SCC	0	0	no	41.5714	0	no	male	68	53	171	17.9542	1	0	1	ICI+chemotherapy	Tislelizumab	PD-1	1	0	0	0	0	0	0	1	0	0	0	0	0	0	0	0	0	0	0	0	338	110	19.17	1.16	2.65	0.138237	15.06	0.785603	127.547	5.68302
1006162099	5e6cfb26ad9f6280b75ff44cf65dc880	adenocarcinoma	1	2	Myocarditis	34	0	no	female	39	53	158	21.2306	0	0	0	ICI+chemotherapy	Pembrolizumab	PD-1	1	1	0	0	0	0	0	1	0	0	0	0	0	0	0	0	0	0	0	0	169	103	6.01	0.56	1.08	0.1797	4.25	0.707155	156.481	3.93519
1006163880	0b9f635d91615e04d0264d439342b4b2	adenocarcinoma	0	0	no	139.857	0	no	male	77	57	163	21.4536	0	0	0	ICI	Pembrolizumab	PD-1	0	0	0	0	0	0	0	0	0	0	0	0	0	0	0	0	0	0	0	0	172	132	6.21	0.56	1.66	0.267311	3.22	0.518519	103.614	1.93976
1006410399	56d4de2e0f807e336623c7db8c571661	sarcomatoid carcinoma	0	0	no	92.2857	0	no	male	69	59	153	25.204	0	0	0	ICI+chemotherapy	Camilizumab	PD-1	1	0	0	0	1	0	0	0	1	0	0	0	0	0	0	0	0	0	0	0	213	143	12.03	0.77	1.96	0.162926	9.17	0.762261	108.673	4.67857
1006485063	c02cd539b78c72ffcbe2db8e6d06b801	SCC	0	0	no	129.286	0	no	female	61	63	172	21.2953	0	0	0	ICI+chemotherapy	Camilizumab	PD-1	1	1	0	0	0	0	0	0	0	0	0	0	0	0	0	0	0	0	0	0	322	114	3.28	0.3	0.86	0.262195	2.07	0.631098	374.419	2.40698
1006518826	5633681d9ce3d51a516914b4c35babf6	SCC	0	0	no	229.714	0	no	male	59	63	165	23.1405	1	1	0	ICI+chemotherapy+antiangiogenic_therapy	Camilizumab	PD-1	1	0	1	0	0	0	0	0	0	0	0	0	0	1	0	1	0	1	1	0	283	79	13.47	0.84	0.88	0.0653304	11.66	0.865627	321.591	13.25
1006631956	b90ccba9a4257a4b8a7327a1724e0842	SCC	0	0	no	144.857	0	no	male	63	66	176	21.3068	1	0	0	ICI+chemotherapy+antiangiogenic_therapy	Nivolumab	PD-1	1	0	1	0	0	0	0	0	0	0	0	0	0	1	1	0	0	1	1	0	120	134	6.06	0.66	1.13	0.186469	4.2	0.693069	106.195	3.71681
1006634758	b8935fb8eadbad1fc16efb0bf5c92f78	SCLC	0	0	no	177.857	0	no	female	59	57	154	24.0344	0	0	0	ICI+chemotherapy+antiangiogenic_therapy	Sintilimab	PD-1	1	0	1	0	0	0	0	0	0	0	0	0	0	1	1	0	0	1	1	0	426	108	3.73	0.41	0.66	0.176944	2.63	0.705094	645.455	3.98485
1006638195	fda1b8033abc463c549951f2e331d9b8	adenocarcinoma	0	0	no	110.286	0	no	male	73	60	174	19.8177	1	1	0	ICI+chemotherapy	Tislelizumab	PD-1	1	0	0	0	0	0	0	1	0	0	0	0	0	0	0	0	0	0	0	0	243	95	19	1.01	1.11	0.0584211	14.16	0.745263	218.919	12.7568
1006666484	30db22dfee4daf1ac1e2f7635a8c73d8	adenocarcinoma	0	0	no	103.571	0	no	male	61	76	179	23.7196	1	0	1	ICI+chemotherapy+antiangiogenic_therapy	Tislelizumab	PD-1	1	1	0	0	0	0	1	0	0	0	0	0	0	1	1	0	0	0	0	0	458	138	14.61	0.63	1.02	0.0698152	12.96	0.887064	449.02	12.7059
1006667848	c9aafc9b54112628869c62882909db5e	adenocarcinoma	0	0	no	253.857	0	no	male	67	54	161	20.8325	1	0	0	ICI+chemotherapy	Sintilimab	PD-1	1	0	1	0	0	0	0	0	0	0	0	0	0	0	0	0	0	0	0	0	127	148	5.39	0.53	1.45	0.269017	3.28	0.608534	87.5862	2.26207
1006687560	d277cfa08fa211172dd4b07b21c2f2c3	SCC	0	0	no	88.7143	0	no	male	70	81	172	27.2107	1	1	0	ICI+chemotherapy	Tislelizumab	PD-1	1	0	1	0	0	0	0	0	1	0	0	0	0	0	0	0	0	0	0	0	107	136	6.2	0.82	1.34	0.216129	3.86	0.622581	79.8507	2.8806
1006741423	8733cbf6755de484482aa6eadf04a0a7	adenocarcinoma	0	0	no	194.143	0	no	female	44	46	157	18.662	0	0	0	ICI	Pembrolizumab	PD-1	0	0	0	0	0	0	0	0	0	0	0	0	0	0	0	0	0	0	0	0	493	132	5.52	0.36	0.99	0.179348	4.16	0.753623	497.98	4.20202
1006756625	501c81a35a0c241c308d7d37d945ea5a	adenocarcinoma	0	0	no	224.857	0	no	male	64	71	168	25.1559	1	0	0	ICI+chemotherapy+antiangiogenic_therapy	Pembrolizumab	PD-1	1	1	1	0	0	0	0	0	0	0	0	0	0	1	1	0	0	0	0	0	272	142	7.32	0.46	3.04	0.415301	3.79	0.51776	89.4737	1.24671
1006756879	542370e4c4be40c34d021acc3997f817	SCC	0	0	no	81.2857	0	no	female	68	60	160	23.4375	0	0	0	ICI+chemotherapy	Pembrolizumab	PD-1	1	1	0	0	0	0	0	1	0	0	0	0	0	0	0	0	0	0	0	0	289	120	11	0.72	1.36	0.123636	8.69	0.79	212.5	6.38971
1006775032	f7a05514bcb57114fa0fa8b8ce052a9e	SCC	1	1	Arrhythmia	12	1	Ventricular Premature Beat (VPB)	female	47	64	162	24.3865	0	0	0	ICI+chemotherapy	Camilizumab	PD-1	1	1	0	0	0	0	0	0	1	0	0	0	0	0	0	0	0	0	0	0	331	132	8.92	0.53	1.72	0.192825	6.5	0.7287	192.442	3.77907
1006780775	daa59598721e1aeb344f58cbfa4d1e78	adenocarcinoma	0	0	no	179.714	0	no	male	62	64	175	20.898	1	0	0	ICI+chemotherapy	Sintilimab	PD-1	1	0	1	0	0	0	0	0	0	0	0	0	0	0	0	0	0	0	0	0	364	104	5.17	0.13	1.35	0.261122	3.47	0.67118	269.63	2.57037
1006794244	aa70a780fd37358ec18b5b9c7a2f0305	SCLC	1	1	Arrhythmia	18	1	Right Bundle Branch Block (RBBB)	male	60	80	172	27.0416	0	0	0	ICI+chemotherapy	Pembrolizumab	PD-1	1	1	0	0	0	0	0	1	0	0	0	0	0	0	0	0	0	0	1	0	294	130	7.61	0.85	2.1	0.275953	4.34	0.570302	140	2.06667
1006831512	a73fb6c85d70c151f688e3922ca79465	adenocarcinoma	0	0	no	193.857	0	no	male	61	45	161	17.2833	1	1	1	ICI	Pembrolizumab	PD-1	0	0	0	0	0	0	0	0	0	0	0	0	0	0	0	0	0	0	0	0	143	140	8.8	0.73	0.76	0.0863636	7.27	0.826136	188.158	9.56579
1006832162	467607a17c55fa63b3ca565447cf83e7	adenocarcinoma	0	0	no	130.857	0	no	male	78	56	166	20.3223	1	1	1	ICI+chemotherapy+antiangiogenic_therapy	Camilizumab	PD-1	1	1	0	0	0	0	0	0	0	0	0	0	0	1	1	0	0	0	1	0	125	148	4.61	0.33	1.57	0.340564	2.66	0.577007	79.6178	1.69427
1006839057	7fb8722aafbc78ebb33ba13b87c11bec	adenocarcinoma	0	0	no	54.4286	0	no	male	69	70	174	23.1206	0	0	0	ICI+chemotherapy	Pembrolizumab	PD-1	1	1	0	0	0	0	0	0	1	0	0	0	0	0	0	0	0	0	0	0	235	131	7.12	0.65	2.17	0.304775	4.12	0.578652	108.295	1.89862
1006901742	c6054fe2684f0ddbe499ca4035479c4e	adenocarcinoma	0	0	no	192.429	0	no	female	47	59	172	19.9432	0	0	0	ICI+chemotherapy	Toripalimab	PD-1	1	0	0	0	0	0	0	1	0	0	0	0	0	0	0	0	0	0	0	0	245	136	5.71	0.39	1.79	0.313485	3.46	0.605954	136.872	1.93296
1006902320	eb02890152f776bed3cf11204226671a	adenocarcinoma	0	0	no	254.714	0	no	male	47	78	172	26.3656	1	0	0	ICI+chemotherapy+antiangiogenic_therapy	Sintilimab	PD-1	1	1	0	0	0	0	0	0	0	0	0	0	0	1	1	0	0	0	0	0	209	147	5.45	0.34	0.64	0.117431	4.26	0.781651	326.562	6.65625
1006908281	a1a7eba3f7841e4bdec89c6ea2a4663a	SCLC	0	0	no	177.571	0	no	female	57	73	168	25.8645	0	0	0	ICI+chemotherapy	Pembrolizumab	PD-1	1	0	0	0	1	0	0	0	1	0	0	0	0	0	0	0	0	0	0	0	87	107	7.66	0.67	1.27	0.165796	5.42	0.707572	68.5039	4.26772
1006908957	4de1a61d405ff84bc3fa0dfbbcc0dbdb	SCC	0	0	no	174.286	0	no	male	78	55	166	19.9594	1	0	0	ICI+chemotherapy	Pembrolizumab	PD-1	1	0	1	0	0	0	0	0	1	0	0	0	0	0	0	0	0	0	1	0	180	132	5.95	0.69	1.35	0.226891	3.55	0.596639	133.333	2.62963
1007004082	7431af69f232630afb6699e13cc05931	adenocarcinoma	0	0	no	144.714	0	no	male	67	55	175	17.9592	0	0	0	ICI+chemotherapy	Tislelizumab	PD-1	1	1	0	0	0	0	0	1	0	0	0	0	0	0	0	0	0	0	0	0	355	132	42.16	4.83	2.29	0.0543169	34.72	0.823529	155.022	15.1616
1007004508	118a242bb8582010356d022bea26ce70	SCLC	0	0	no	104.857	0	no	male	62	63	168	22.3214	1	0	0	ICI+chemotherapy	Durvalumab	PD-L1	1	0	0	0	0	1	0	1	0	0	0	0	0	0	0	0	0	0	0	0	76	134	5.33	0.59	0.69	0.129456	4	0.750469	110.145	5.7971
1007017525	b13cb6fb4da28ef71194bb091d267146	adenocarcinoma	0	0	no	54.1429	0	no	male	67	57	164	21.1927	1	1	0	ICI+chemotherapy	Tislelizumab	PD-1	1	1	0	0	0	0	0	0	1	0	0	0	0	0	0	0	0	0	0	0	210	98	6.56	0.6	0.91	0.13872	4.22	0.643293	230.769	4.63736
1007042242	8c21411c1a132b4a72db21697f1f74c5	SCC	0	0	no	79.8571	0	no	male	72	72	175	23.5102	0	0	0	ICI+chemotherapy	Pembrolizumab	PD-1	1	0	1	1	0	0	0	0	0	0	0	0	0	0	0	0	0	0	0	0	439	99	14.6	0.84	1.63	0.111644	12	0.821918	269.325	7.36196
1007044290	505452d7a4d0af87f7de4bf3eed7a501	SCC	0	0	no	80.7143	0	no	male	68	53	159	20.9644	1	1	0	ICI+chemotherapy	Pembrolizumab	PD-1	1	0	1	0	0	0	0	0	1	0	0	0	0	0	0	0	0	0	0	0	248	142	7.39	0.71	2.5	0.338295	4.02	0.543978	99.2	1.608
1007055057	aebe9c259fd2a5a88ede152f517239df	adenocarcinoma	0	0	no	179.714	0	no	male	67	76	173	25.3934	1	1	0	ICI+chemotherapy+antiangiogenic_therapy	Camilizumab	PD-1	1	1	0	1	0	0	1	1	0	0	0	0	0	1	1	0	1	0	0	0	269	133	5.98	0.43	1.68	0.280936	3.82	0.638796	160.119	2.27381
1007082846	b8d36f00fd668c53504685ee869ec3dd	adenocarcinoma	0	0	no	111.857	0	no	female	42	43	161	16.5889	0	0	0	ICI+chemotherapy	Pembrolizumab	PD-1	1	1	1	0	0	0	1	0	0	0	0	0	0	0	0	0	0	0	0	0	280	122	9.4	0.5	2.32	0.246809	6.49	0.690426	120.69	2.79741
1007171070	d62f456194c2f82d7a4697b00c547218	adenocarcinoma	0	0	no	153.714	0	no	male	60	67	170	23.1834	1	1	0	ICI+chemotherapy	Toripalimab	PD-1	1	0	1	0	0	0	1	0	0	0	0	0	0	0	0	0	0	0	0	0	205	112	5	0.44	1.11	0.222	3.02	0.604	184.685	2.72072
1007184773	ae0d5cc40e8648d71a05d2541a5a6d3a	adenocarcinoma	0	0	no	141.429	0	no	male	65	49	168	17.3611	1	0	0	ICI+chemotherapy	Camilizumab	PD-1	1	0	0	0	0	1	1	1	0	0	0	0	0	0	0	0	0	0	0	0	348	122	5.42	0.25	0.32	0.0590406	4.83	0.891144	1087.5	15.0938
1007205262	c9803d4b45a692b60cb496b8e8913923	adenocarcinoma	0	0	no	246.571	0	no	female	71	61	173	20.3816	0	0	0	ICI+chemotherapy	Pembrolizumab	PD-1	1	0	0	1	0	0	0	0	0	0	0	0	0	0	0	0	0	0	1	0	201	100	21.26	1.27	1.28	0.060207	18.58	0.873942	157.031	14.5156
1007234960	e41233e746942ef41cf607fef2908420	adenocarcinoma	0	0	no	164.143	0	no	male	60	70	159	27.6888	1	1	1	ICI+antiangiogenic_therapy	Camilizumab	PD-1	0	0	0	0	0	0	0	0	0	0	0	0	0	1	1	0	0	1	0	0	181	114	12.92	0.74	3.04	0.235294	8.79	0.680341	59.5395	2.89145
1007246803	9ac88fc423593ebdb6c69abb8605c58a	SCC	0	0	no	100.857	0	no	male	72	90	172	30.4218	1	1	0	ICI+antiangiogenic_therapy	Tislelizumab	PD-1	0	0	0	0	0	0	0	0	0	0	0	0	0	1	1	1	0	0	1	0	78	126	3.09	0.38	0.9	0.291262	1.67	0.540453	86.6667	1.85556
1007251395	4927faf84aec157d306a8479cd8d6499	SCC	0	0	no	137.857	0	no	male	67	57	167	20.4382	1	0	0	ICI	Tislelizumab	PD-1	0	0	0	0	0	0	0	0	0	0	0	0	0	0	0	0	0	0	0	0	314	118	6.07	0.72	1.03	0.169687	4.27	0.70346	304.854	4.14563
1007261947	f9e03740842dbc0b35d8ba2da30c95df	SCC	0	0	no	149.857	0	no	female	59	57	174	18.8268	0	0	0	ICI+chemotherapy	Camilizumab	PD-1	1	1	0	0	0	0	0	1	0	0	0	0	0	0	0	0	0	0	0	0	142	124	3.22	0.26	0.99	0.307453	1.94	0.602484	143.434	1.9596
1007309818	4daafaa0d15269ae52358bada81fd306	SCC	0	0	no	121.857	0	no	female	56	55	158	22.0317	0	0	0	ICI+chemotherapy+antiangiogenic_therapy	Sintilimab	PD-1	1	0	1	0	0	0	0	0	0	0	0	0	0	1	0	0	1	0	0	0	256	123	6.93	0.62	1.39	0.200577	4.67	0.673882	184.173	3.35971
1007318575	48ca0e6480ffeda56d2483dcb9d11677	adenocarcinoma	0	0	no	128.571	0	no	male	72	59	168	20.9042	1	1	0	ICI+chemotherapy	Tislelizumab	PD-1	1	0	0	1	0	0	0	1	0	0	0	0	0	0	0	0	0	0	0	0	272	141	7.19	0.55	2.29	0.318498	4.01	0.557719	118.777	1.75109
1007325538	a352f433206790a09d76f6ab439b015e	adenocarcinoma	0	0	no	243.857	0	no	male	64	60	169	21.0077	1	1	0	ICI+chemotherapy	Sintilimab	PD-1	1	1	1	0	0	0	0	0	0	0	0	0	0	0	0	0	0	0	0	0	170	144	4.61	0.58	0.73	0.158351	3.2	0.694143	232.877	4.38356
1007335273	4ca028435bd5de53b46a5fdf9825255e	adenocarcinoma	0	0	no	137.714	0	no	female	57	54	164	20.0773	0	0	0	ICI+chemotherapy+antiangiogenic_therapy	Tislelizumab	PD-1	1	1	1	0	0	0	0	1	1	0	0	0	0	1	1	1	0	0	1	0	251	102	5.76	0.43	1.05	0.182292	4.23	0.734375	239.048	4.02857
1007335584	4a7d7e2d5079a00c6b997c45e37bc9e4	adenocarcinoma	0	0	no	154.571	0	no	male	68	70	173	23.3887	0	0	0	ICI+chemotherapy	Toripalimab	PD-1	1	1	0	0	0	0	0	1	0	0	0	0	0	0	0	0	0	0	1	0	564	113	13.19	0.82	2.39	0.181198	9.87	0.748294	235.983	4.12971
1007339390	e41859c0485773560341940885cd5c31	adenocarcinoma	0	0	no	264.857	0	no	male	77	65	161	25.0762	1	0	0	ICI+chemotherapy	Pembrolizumab	PD-1	1	0	1	0	0	0	0	0	0	0	0	0	0	0	0	0	0	0	0	0	178	146	7.99	0.41	1.33	0.166458	6.11	0.764706	133.835	4.59398
1007349987	1e511f55f751db0903a8b0e333e8f126	SCC	0	0	no	29.8571	0	no	female	72	56	155	23.1842	0	0	1	ICI+chemotherapy+antiangiogenic_therapy	Atezolizumab	PD-L1	1	1	0	0	0	0	0	0	1	0	0	0	0	1	1	0	0	0	0	0	253	134	5.25	0.25	1.84	0.350476	3.05	0.580952	137.5	1.65761
1007373681	3eea8a7ea611bc411f58e02866bf4e1e	adenocarcinoma	0	0	no	104.571	0	no	male	49	77	170	26.6436	1	1	0	ICI+chemotherapy	Tislelizumab	PD-1	1	0	1	0	1	0	0	1	0	0	0	0	0	0	0	0	0	0	0	0	243	127	5.36	0.53	1.77	0.330224	3.03	0.565299	137.288	1.71186
1007377745	24f85f6dd4a76a92468f96bda2f66d65	adenocarcinoma	0	0	no	115.429	0	no	female	58	56	167	20.0796	0	0	1	ICI	Camilizumab	PD-1	0	0	0	0	0	0	0	0	0	0	0	0	0	0	0	0	0	0	0	0	318	127	5.39	0.5	0.76	0.141002	4.08	0.756957	418.421	5.36842
1007404622	17f60eaef6b00862c8d2ebf02039a8f0	adenocarcinoma	0	0	no	161.571	0	no	male	73	63	174	20.8086	1	0	0	ICI+chemotherapy	Pembrolizumab	PD-1	1	0	1	0	0	0	0	0	0	0	0	0	0	0	0	0	0	0	0	0	219	128	5.79	0.46	1.56	0.26943	3.63	0.626943	140.385	2.32692
1007423569	17de758bdd0f21cb5b669dac6207b61a	adenocarcinoma	0	0	no	177.429	0	no	female	66	61	168	21.6128	0	0	0	ICI+chemotherapy	Camilizumab	PD-1	1	1	0	0	0	0	0	1	0	0	0	0	0	0	0	0	0	0	0	0	173	119	2.7	0.17	0.85	0.314815	1.62	0.6	203.529	1.90588
1007443944	f25641f32a441fa8c34218c55a090c93	SCC	0	0	no	205.429	0	no	female	75	49	172	16.563	0	0	0	ICI+chemotherapy+antiangiogenic_therapy	Pembrolizumab	PD-1	1	0	1	0	0	0	0	0	1	0	0	0	0	1	0	1	0	0	0	0	235	110	5.16	0.51	1.63	0.315891	2.82	0.546512	144.172	1.73006
1007454793	a765518b9d10402408f44832d71027b2	LCC	1	1	Arrhythmia	12	1	T-wave Abnormality	male	70	51	165	18.7328	1	1	0	ICI	Tislelizumab	PD-1	0	0	0	0	0	0	0	0	0	0	0	0	0	0	0	0	0	0	0	0	182	115	6.38	0.73	0.54	0.0846395	4.69	0.73511	337.037	8.68519
1007460522	f78d1ffe09b8b46ff80930e13e68f247	adenocarcinoma	0	0	no	222	0	no	male	66	60	155	24.974	0	0	0	ICI+chemotherapy+antiangiogenic_therapy	Toripalimab	PD-1	1	0	1	0	0	0	0	0	0	0	0	0	0	1	1	0	0	0	0	0	234	98	5.53	0.33	0.49	0.0886076	4.68	0.846293	477.551	9.55102
1007473819	d5b432737d8c4af99bb78e711b2eba58	adenocarcinoma	0	0	no	162.429	0	no	male	32	71	168	25.1559	0	0	0	ICI+antiangiogenic_therapy+targeted_therapy	Pembrolizumab	PD-1	0	0	0	0	0	0	0	0	0	1	0	1	0	1	0	1	0	0	0	0	154	145	5.21	0.51	1.78	0.341651	2.72	0.522073	86.5169	1.52809
1007478619	c821cd2ca6733b030492a747d7e3d0e0	adenocarcinoma	0	0	no	114.571	0	no	male	69	80	177	25.5354	1	1	0	ICI+chemotherapy	Sintilimab	PD-1	1	1	0	0	0	0	0	1	0	0	0	0	0	0	0	0	0	0	0	0	315	105	25.12	0.62	1.17	0.0465764	23.3	0.927548	269.231	19.9145
1007536192	e6cb82efda9bd6132f6e7e738c766305	SCC	0	0	no	223.571	0	no	male	60	67	170	23.1834	1	0	0	ICI+antiangiogenic_therapy	Nivolumab	PD-1	0	0	0	0	0	0	0	0	0	0	0	0	0	1	0	1	0	0	0	0	374	138	5.23	0.5	0.95	0.181644	3.62	0.692161	393.684	3.81053
1007547744	2467e1ef4783c15a64f85f14faee88a4	SCLC	0	0	no	220.571	0	no	male	78	49	160	19.2578	1	0	0	ICI	Toripalimab	PD-1	0	0	0	0	0	0	0	0	0	0	0	0	0	0	0	0	0	0	0	0	168	109	5.97	0.38	0.55	0.0921273	4.76	0.79732	305.455	8.65455
1007577504	61204a0e37e96aba7e56b0fbd5252501	adenocarcinoma	0	0	no	189.857	0	no	male	60	60	162	22.8624	1	1	0	ICI+chemotherapy	Camilizumab	PD-1	1	0	1	0	0	0	0	1	0	0	0	0	0	0	0	0	0	0	0	0	158	137	5	0.53	1.18	0.236	3.16	0.632	133.898	2.67797
1007584668	a0f10810cfbee468fcb1969be9d7f4b2	SCC	0	0	no	165	0	no	male	83	67	161	26.0479	1	0	0	ICI	Pembrolizumab	PD-1	0	0	0	0	0	0	0	0	0	0	0	0	0	0	0	0	0	0	0	0	249	120	9.52	1.19	1.96	0.205882	6.01	0.631303	127.041	3.06633
1007584830	f61d913fc61843f8dc6c2bd018c1e834	SCC	0	0	no	250.286	0	no	male	61	70	167	25.0995	1	1	0	ICI+antiangiogenic_therapy	Sintilimab	PD-1	0	0	0	0	0	0	0	0	0	0	0	0	0	1	0	0	1	0	0	0	203	142	8.87	0.98	3.12	0.351747	4.56	0.514092	65.0641	1.46154
1008121011	d71549a00da9f46e64ad996df0809923	adenocarcinoma	0	0	no	229.286	0	no	male	82	57	158	22.8329	1	1	0	ICI+chemotherapy	Pembrolizumab	PD-1	1	1	0	0	0	0	0	1	0	0	0	0	0	0	0	0	0	0	0	0	305	104	10.81	0.96	1.09	0.100833	8.57	0.792784	279.817	7.86239
1008125220	dd35addb4bd92a83a8758565f445203a	adenocarcinoma	0	0	no	254.714	0	no	female	70	66	176	21.3068	0	0	0	ICI+antiangiogenic_therapy	Sintilimab	PD-1	0	0	0	0	0	0	0	0	0	0	0	0	0	1	1	0	0	0	0	0	198	135	7.71	0.59	3.05	0.39559	3.85	0.499351	64.918	1.2623
1008156199	b3a551d457eb0acd6c2fc37d327a8727	SCC	0	0	no	183.286	0	no	male	67	48	157	19.4734	1	1	0	ICI+chemotherapy	Camilizumab	PD-1	1	0	1	0	0	0	0	0	1	0	0	0	0	0	0	0	0	0	0	0	138	145	5.6	0.3	0.55	0.0982143	4.74	0.846429	250.909	8.61818
1008165169	fe7fd89750a1614e673f39b18a253e50	SCC	1	1	Arrhythmia	4	1	Atrial Premature Beat (APB),T-wave Abnormality	male	69	60	165	22.0386	1	1	0	ICI+chemotherapy	Tislelizumab	PD-1	1	0	1	0	0	0	0	0	1	0	0	0	0	0	0	0	0	0	0	0	192	138	7.41	0.61	1.12	0.151147	5.57	0.751687	171.429	4.97321
1008174902	2ea93787a92bc6fb13e3d2fa483b2cf6	SCC	0	0	no	241.714	0	no	male	58	69	172	23.3234	1	1	0	ICI+chemotherapy	Sintilimab	PD-1	1	0	1	0	0	0	0	0	0	0	0	0	0	0	0	0	0	0	0	0	153	120	5.94	0.26	1.12	0.188552	4.49	0.755892	136.607	4.00893
1008178098	cb91696dc2556da0dab89e0d05182d3f	adenocarcinoma	0	0	no	40	0	no	female	74	49	150	21.7778	0	0	0	ICI+antiangiogenic_therapy	Tislelizumab	PD-1	0	0	0	0	0	0	0	0	0	0	0	0	0	1	0	1	0	0	0	0	126	97	6.25	0.57	1.36	0.2176	4.16	0.6656	92.6471	3.05882
1008180705	b6e4960c69bbf77dea99d4373ca2ec15	adenocarcinoma	0	0	no	212.143	0	no	male	69	54	162	20.5761	1	1	0	ICI+chemotherapy	Sintilimab	PD-1	1	0	1	0	0	0	0	0	0	0	0	0	0	0	0	0	0	0	0	0	203	103	7.33	0.7	1.76	0.240109	4.66	0.635744	115.341	2.64773
1008268094	0891c043f8ffeff62e0a632625a6bc97	NSCLC	0	0	no	140.857	0	no	female	72	44	150	19.5556	0	0	0	ICI	Pembrolizumab	PD-1	0	0	0	0	0	0	0	0	0	0	0	0	0	0	0	0	0	0	0	0	237	128	9.44	0.6	2.78	0.294492	5.52	0.584746	85.2518	1.98561
1008276861	244d846929d3771dac6f85e2c14b66d0	NET	0	0	no	149.286	0	no	male	65	65	171	22.2291	1	0	0	ICI+chemotherapy	Durvalumab	PD-L1	1	0	0	0	1	0	0	1	0	0	0	0	0	0	0	0	0	0	0	0	200	140	6.32	0.6	1.83	0.289557	3.8	0.601266	109.29	2.0765
1008304606	9a2449e92ca4251bfa31fc0fd87bb6b7	SCC	0	0	no	213.714	0	no	male	60	66	166	23.9512	1	1	0	ICI+chemotherapy	Sintilimab	PD-1	1	0	0	0	0	0	0	1	0	0	0	0	0	0	0	0	0	0	0	0	347	151	12.13	0.85	3.48	0.286892	7.76	0.639736	99.7126	2.22989
1008312518	47dda232c13b8e06deb4367d643b64ed	adenocarcinoma	0	0	no	251.429	0	no	female	56	69	177	22.0243	0	0	0	ICI+antiangiogenic_therapy	Camilizumab	PD-1	0	0	0	0	0	0	0	0	0	0	0	0	0	1	1	0	0	0	0	0	211	120	3.76	0.59	1.16	0.308511	1.94	0.515957	181.897	1.67241
1008331517	71c1f2fc231d01df7596bdebeca377f1	SCC	0	0	no	281.571	0	no	male	79	78	178	24.6181	1	0	0	ICI+chemotherapy	Pembrolizumab	PD-1	1	0	0	1	0	0	0	0	0	0	0	0	0	0	0	0	0	0	0	0	166	130	8.11	0.65	0.6	0.0739827	4.86	0.59926	276.667	8.1
1008350307	3f4185ec0992b8fccd8d95a5ae627cdf	adenocarcinoma	0	0	no	225	0	no	female	67	60	166	21.7738	0	0	0	ICI+chemotherapy+antiangiogenic_therapy	Pembrolizumab	PD-1	1	0	1	0	0	0	1	1	0	0	0	0	0	1	1	0	0	0	1	0	493	123	11.05	1.43	2.18	0.197285	7.34	0.664253	226.147	3.36697
1008385713	9986e74754401116a2eaae92e141feaf	sarcomatoid carcinoma	0	0	no	240.143	0	no	female	85	40	147	18.5108	0	0	0	ICI	Nivolumab	PD-1	0	0	0	0	0	0	0	0	0	0	0	0	0	0	0	0	0	0	0	0	171	92	6.24	0.43	1.8	0.288462	3.42	0.548077	95	1.9
1008409241	03d4728ee149a27f832d78c861aa0d57	SCLC	0	0	no	163	0	no	male	58	74	166	26.8544	1	1	0	ICI	Sintilimab	PD-1	0	0	0	0	0	0	0	0	0	0	0	0	0	0	0	0	0	0	0	0	212	138	5.27	0.33	1.54	0.29222	3.13	0.593928	137.662	2.03247
1008420858	f010f1038cce88c135c042cb299011b5	SCC	0	0	no	165.143	0	no	male	73	78	168	27.5298	0	0	0	ICI+chemotherapy+antiangiogenic_therapy	Durvalumab	PD-L1	1	0	0	0	1	0	0	1	0	0	0	0	0	1	0	1	0	0	1	0	128	106	5.78	0.42	2.14	0.370242	3.14	0.543253	59.8131	1.46729
1008420923	8d76e1007d59c81522b34b170b0d8931	adenocarcinoma	0	0	no	168.714	0	no	female	56	58	161	22.3757	0	0	0	ICI+chemotherapy	Camilizumab	PD-1	1	1	1	0	0	0	1	0	0	0	0	0	0	0	0	0	0	0	0	0	505	122	12.03	0.94	2.4	0.199501	8.66	0.719867	210.417	3.60833
1008423338	5b63e65c4c678ea3dacd98df0ce44ae8	SCC	0	0	no	163.857	0	no	female	50	61	171	20.8611	0	0	0	ICI+chemotherapy	Tislelizumab	PD-1	1	1	1	0	0	0	0	1	0	0	0	0	0	0	0	0	0	0	0	0	259	110	4.14	0.46	1.04	0.251208	2.45	0.591787	249.038	2.35577
1008423666	a011cf3c40f39ae7bb7c709f251d5845	adenocarcinoma	0	0	no	144.429	0	no	male	55	70	178	22.0932	1	0	0	ICI+chemotherapy+antiangiogenic_therapy	Pembrolizumab	PD-1	1	0	1	0	0	0	1	0	0	0	0	0	0	1	1	0	0	0	0	0	305	105	7.55	0.29	0.57	0.0754967	6.58	0.871523	535.088	11.5439
1008430904	c123e181a2223cb816a2d88720e41540	adenocarcinoma	0	0	no	269	0	no	male	79	80	164	29.7442	1	0	0	ICI+chemotherapy	Pembrolizumab	PD-1	1	0	1	0	0	0	0	0	0	0	0	0	0	0	0	0	0	0	0	0	305	102	4.09	0.38	0.61	0.149144	2.27	0.555012	500	3.72131
1008434099	e3fb7d3f2e111645d1a0cb0f19cd65a4	NET	0	0	no	187.714	0	no	male	64	60	167	21.5139	1	1	0	ICI+chemotherapy+antiangiogenic_therapy	Pembrolizumab	PD-1	1	0	1	0	0	0	0	1	0	0	0	0	0	1	1	0	0	0	0	0	146	135	8.76	0.69	2.32	0.26484	5	0.570776	62.931	2.15517
1008451185	9c905869d9a6aab1c442c7e21f2096c7	NET	0	0	no	195.571	0	no	male	54	72	166	26.1286	1	1	0	ICI+antiangiogenic_therapy	Pembrolizumab	PD-1	0	0	0	0	0	0	0	0	0	0	0	0	0	1	0	1	0	0	0	0	200	149	6.25	0.55	0.93	0.1488	4.55	0.728	215.054	4.89247
1008470170	754b7089d66430fa20b5a77db8bd3263	SCC	0	0	no	260.429	0	no	male	45	62	165	22.7732	1	0	0	ICI+chemotherapy+antiangiogenic_therapy	Sintilimab	PD-1	1	0	1	1	0	0	1	0	0	0	0	0	0	1	1	0	0	0	0	0	220	86	7.63	0.84	0.58	0.0760157	6.13	0.803408	379.31	10.569
1008471203	ae036e8f8da5888cb5618a2e16192a61	SCC	0	0	no	181.714	0	no	male	76	41	155	17.0656	1	1	0	ICI+chemotherapy	Nivolumab	PD-1	1	1	0	0	0	0	0	1	0	0	0	0	0	0	0	0	0	0	0	0	339	126	7.86	0.69	1.91	0.243003	5.12	0.651399	177.487	2.68063
1008477666	7b0048e174a6934c4eaf44201430aa96	SCC	0	0	no	187.429	0	no	male	74	62	168	21.9671	1	1	0	ICI+chemotherapy	Tislelizumab	PD-1	1	0	0	0	1	0	0	1	0	0	0	0	0	0	0	0	0	0	0	0	288	130	10.81	0.6	2.05	0.189639	7.94	0.734505	140.488	3.87317
1008480863	bd39614d44b75071a399fba679bf9d9b	SCC	0	0	no	249	0	no	female	41	49	178	15.4652	0	0	0	ICI+chemotherapy	Sintilimab	PD-1	1	0	1	0	0	0	0	0	0	0	0	0	0	0	0	0	0	0	0	0	197	119	5.24	0.53	0.86	0.164122	3.75	0.715649	229.07	4.36047
1008484966	fc0e779af13d65394d750ed8d1b72827	adenocarcinoma	0	0	no	217.857	0	no	male	60	70	173	23.3887	1	1	0	ICI+antiangiogenic_therapy	Sintilimab	PD-1	0	0	0	0	0	0	0	0	0	0	0	0	0	1	0	1	0	0	0	0	298	91	13.16	1.2	2.11	0.160334	9.34	0.709726	141.232	4.42654
1008504554	dbaaab27368e14f04a8c717e1e93664c	adenocarcinoma	0	0	no	142.857	0	no	male	69	70	170	24.2215	1	0	0	ICI+chemotherapy	Camilizumab	PD-1	1	1	0	0	0	0	0	1	1	0	0	0	0	0	0	0	0	1	1	0	275	139	4.99	0.44	1.21	0.242485	3.11	0.623246	227.273	2.57025
1008515246	cb7e67cec16fe75e5f5c1cc4e9622e38	SCC	0	0	no	181.714	0	no	male	72	68	163	25.5937	1	1	0	ICI+chemotherapy	Toripalimab	PD-1	1	0	1	1	0	0	0	0	0	0	0	0	0	0	0	0	0	0	1	0	174	131	4.22	0.65	1.07	0.253555	2.44	0.578199	162.617	2.28037
1008522299	0139e3ddbf086234e32a826616aac103	SCLC	0	0	no	133	0	no	male	76	86	168	30.4705	1	1	0	ICI+chemotherapy	Durvalumab	PD-L1	1	0	0	0	1	0	0	1	1	0	0	0	0	0	0	0	0	0	1	0	137	134	5.8	0.5	1.88	0.324138	3.35	0.577586	72.8723	1.78191
1008538624	522d3c128194df7f714c5577b1516781	SCC	0	0	no	192.714	0	no	male	74	86	178	27.143	1	0	0	ICI	Sintilimab	PD-1	0	0	0	0	0	0	0	0	0	0	0	0	0	0	0	0	0	0	0	0	222	118	6.31	0.5	1.3	0.206022	4.32	0.684628	170.769	3.32308
1008547108	01f379a2d1669faad50d6d764544db39	adenocarcinoma	0	0	no	188.143	0	no	male	52	81	173	27.0641	0	0	0	ICI+chemotherapy+antiangiogenic_therapy	Pembrolizumab	PD-1	1	0	1	1	0	0	0	1	0	0	0	0	0	1	1	0	0	0	0	0	260	137	8.05	0.73	1.08	0.134161	5.92	0.735404	240.741	5.48148
1008552830	88592113def8c9f250685062fada2086	adenocarcinoma	0	0	no	161.857	0	no	female	53	83	175	27.102	0	0	0	ICI+chemotherapy+antiangiogenic_therapy	Sintilimab	PD-1	1	1	0	1	1	0	1	1	0	0	0	0	0	1	0	1	0	1	1	0	203	145	7.25	0.4	2.38	0.328276	4.38	0.604138	85.2941	1.84034
1008560734	b51802e1467a379b60d5e0ee6f74f6aa	adenocarcinoma	0	0	no	158.714	0	no	male	74	70	161	27.0051	1	1	0	ICI	Tislelizumab	PD-1	0	0	0	0	0	0	0	0	0	0	0	0	0	0	0	0	0	0	0	0	210	156	5.26	0.63	1.24	0.235741	3.24	0.61597	169.355	2.6129
1008568098	55782a2d2af326c92c569842b0feced9	adenocarcinoma	0	0	no	240.857	0	no	male	61	57	166	20.6852	1	1	0	ICI+chemotherapy	Nivolumab	PD-1	1	0	0	1	0	0	1	0	0	0	0	0	0	0	0	0	0	0	0	0	442	114	11.02	1.52	1.55	0.140653	7.81	0.708711	285.161	5.03871
1008570117	9531a4d1c1dcc2e6f11f3ca533e4ea4e	adenocarcinoma	0	0	no	135.143	0	no	female	72	43	155	17.7315	0	0	0	ICI+chemotherapy	Tislelizumab	PD-1	1	0	1	0	0	0	0	0	0	0	0	0	0	0	0	0	0	0	0	0	88	95	5.62	0.46	0.45	0.0800712	4.67	0.830961	195.556	10.3778
1008572332	ba03483c5d877067a294ea92f5ce6475	SCC	1	1	Pericarditis	6	0	no	female	52	41	160	16.0156	0	0	0	ICI+chemotherapy+antiangiogenic_therapy	Sintilimab	PD-1	1	0	1	0	0	0	0	0	0	0	0	0	0	1	0	1	0	0	0	0	56	111	8.83	0.27	1.19	0.134768	7.32	0.828992	47.0588	6.15126
1008572677	fa7fd21a4c22e711c328b53cfba6c65b	adenocarcinoma	0	0	no	256.857	0	no	male	67	73	168	25.8645	1	1	0	ICI+chemotherapy	Pembrolizumab	PD-1	1	0	1	0	0	0	0	0	0	0	0	0	0	0	0	0	0	0	0	0	246	116	7.94	0.68	1.78	0.224181	5.38	0.677582	138.202	3.02247
1008576945	8b055d183bbf1df5f63ccd8da5435b08	SCC	0	0	no	128.429	0	no	female	33	48	158	19.2277	0	0	0	ICI+chemotherapy+antiangiogenic_therapy	Durvalumab	PD-L1	1	0	1	1	0	0	1	0	0	0	0	0	0	1	0	0	1	0	0	0	216	109	10.11	0.7	0.85	0.0840752	8.43	0.833828	254.118	9.91765
1008579486	66eb33f99357fb9a756e97e1c4c1e5da	adenocarcinoma	0	0	no	185.429	0	no	male	61	59	176	19.047	1	1	1	ICI+chemotherapy+antiangiogenic_therapy	Sintilimab	PD-1	1	0	0	0	0	0	1	0	0	0	0	0	0	1	0	0	1	0	0	0	290	131	7.71	0.79	1.72	0.223087	4.6	0.596628	168.605	2.67442
1008579532	c1ee9acf119c7d19fe14af627f9cebdf	adenocarcinoma	0	0	no	70	0	no	male	67	83	171	28.3848	1	1	0	ICI+chemotherapy+antiangiogenic_therapy	Pembrolizumab	PD-1	1	1	0	0	0	0	0	0	1	0	0	0	0	1	1	0	0	1	1	0	194	125	8.73	0.97	1.24	0.142039	6.5	0.744559	156.452	5.24194
1008585170	525c0ee4163a35dd61fdd15f565f56dc	SCLC	0	0	no	160.857	0	no	female	47	58	152	25.1039	0	0	0	ICI+chemotherapy+antiangiogenic_therapy	Camilizumab	PD-1	1	1	1	0	0	0	1	1	0	0	0	0	0	1	1	0	0	0	0	0	214	95	8.2	0.48	1.98	0.241463	5.14	0.626829	108.081	2.59596
1008594208	f25996e5670c243b1341cfead318bbb7	NET	0	0	no	255	0	no	male	59	87	176	28.0863	1	0	0	ICI	Pembrolizumab	PD-1	0	0	0	0	0	0	0	0	0	0	0	0	0	0	0	0	0	0	0	0	273	128	5.79	0.59	0.64	0.110535	4.35	0.751295	426.562	6.79688
1008599952	05ea6ba7cb3e66f2cd4ad4f43cc7e089	adenosquamous carcinoma	0	0	no	235.857	0	no	female	76	55	163	20.7008	0	0	0	ICI+chemotherapy	Nivolumab	PD-1	1	0	1	0	0	0	0	0	0	0	0	0	0	0	0	0	0	0	0	0	141	120	2.63	0.23	1.26	0.479087	1.07	0.406844	111.905	0.849206
1008605916	f0d8fbb388013a80dd96a01eae1e2a59	SCC	0	0	no	176	0	no	female	46	55	163	20.7008	0	0	0	ICI+chemotherapy	Pembrolizumab	PD-1	1	0	0	1	0	0	0	0	0	0	0	0	0	0	0	0	0	0	0	0	366	113	4.69	0.39	1.6	0.341151	2.61	0.556503	228.75	1.63125
1008613879	3c097a6b0c78659385540ee5f0d5f12d	SCC	0	0	no	38.8571	0	no	male	65	63	170	21.7993	1	1	0	ICI+chemotherapy	Pembrolizumab	PD-1	1	1	0	0	0	0	0	1	0	0	0	0	0	0	0	0	0	0	1	0	116	127	1.93	0.29	0.88	0.455959	0.72	0.373057	131.818	0.818182
1008631332	17c857928c26af20bade4108282d8ce8	adenocarcinoma	0	0	no	194.143	0	no	male	60	60	155	24.974	1	1	0	ICI+chemotherapy	Sintilimab	PD-1	1	1	0	0	0	0	0	0	0	0	0	0	0	0	0	0	0	0	0	0	174	104	17.22	0.46	0.88	0.0511034	15.86	0.921022	197.727	18.0227
1008652426	ef940f5af2addab5583b3d9e1ed1ad46	SCC	0	0	no	193.429	0	no	male	65	59	172	19.9432	1	0	0	ICI+chemotherapy	Nivolumab	PD-1	1	0	1	0	1	0	1	1	0	0	0	0	0	0	0	0	0	0	0	0	280	140	9.18	0.72	1.15	0.125272	7.03	0.765795	243.478	6.11304
1008659694	f2e829b640dda32d302653baae4d2ee4	adenocarcinoma	0	0	no	216.714	0	no	male	71	72	171	24.623	1	0	0	ICI+chemotherapy	Pembrolizumab	PD-1	1	1	0	0	0	0	0	1	0	0	0	0	0	0	0	0	0	0	1	0	297	148	7.24	0.73	1.69	0.233425	4.65	0.642265	175.74	2.75148
1008660422	88dde6bc7765ad599d7a11576b0a0973	adenocarcinoma	0	0	no	145.429	0	no	male	50	60	165	22.0386	0	0	0	ICI	Pembrolizumab	PD-1	0	0	0	0	0	0	0	0	0	0	0	0	0	0	0	0	0	0	0	0	171	127	11.35	0.69	1.05	0.092511	9.59	0.844934	162.857	9.13333
1008663995	f292eeae7c13ed7496fc66f51d2b6b9e	adenocarcinoma	0	0	no	226.429	0	no	male	67	53	161	20.4467	1	1	0	ICI	Nivolumab	PD-1	0	0	0	0	0	0	0	0	0	0	0	0	0	0	0	0	0	0	0	0	145	129	6.2	0.46	2.07	0.333871	3.52	0.567742	70.0483	1.70048
1008676223	49cd9c02936e1758557904c3bb2ec947	SCC	1	1	Arrhythmia	3	1	Right Bundle Branch Block (RBBB)	male	65	55	163	20.7008	1	1	0	ICI+chemotherapy	Sintilimab	PD-1	1	0	1	0	0	0	1	0	0	0	0	0	0	0	0	0	0	0	1	0	311	134	6.26	0.46	0.53	0.0846645	5.11	0.816294	586.792	9.64151
1008679715	965f5789a58bc961d3b8021b285a13fb	SCC	0	0	no	194.429	0	no	male	62	86	179	26.8406	0	0	0	ICI+chemotherapy	Sintilimab	PD-1	1	0	0	0	1	0	1	0	1	0	0	0	0	0	0	0	0	0	0	0	177	147	8.67	0.53	2.39	0.275663	5.55	0.640138	74.0586	2.32218
1008687401	317fd682448dad52961d755c9ac34416	adenocarcinoma	0	0	no	214.714	0	no	male	75	61	164	22.68	1	1	0	ICI+chemotherapy	Sintilimab	PD-1	1	0	1	0	0	0	0	0	0	0	0	0	0	0	0	0	0	0	0	0	173	106	11.36	1.13	0.81	0.0713028	7.79	0.685739	213.58	9.61728
1008708148	1ee7902899672c1f2b113cb07931d3d7	SCC	0	0	no	169.571	0	no	male	68	86	178	27.143	1	0	0	ICI+antiangiogenic_therapy	Sintilimab	PD-1	0	0	0	0	0	0	0	0	0	0	0	0	0	1	0	0	1	0	0	0	141	98	4.25	0.64	0.66	0.155294	2.73	0.642353	213.636	4.13636
1008712580	f467af5715026bee92b076d2d333df09	adenocarcinoma	0	0	no	64.8571	0	no	female	70	40	158	16.0231	0	0	0	ICI+antiangiogenic_therapy	Sintilimab	PD-1	0	0	0	0	0	0	0	0	0	0	0	0	0	1	1	0	0	0	0	0	329	124	3	0.23	0.85	0.283333	1.82	0.606667	387.059	2.14118
1008731592	919175f8b7f16b174bb30be49d5572db	adenocarcinoma	0	0	no	109.429	0	no	male	65	55	170	19.0311	1	1	0	ICI+antiangiogenic_therapy	Sintilimab	PD-1	0	0	0	0	0	0	0	0	0	0	0	0	0	1	0	1	0	0	0	0	338	127	4.78	0.68	1.33	0.278243	2.62	0.548117	254.135	1.96992
1008738291	e4bdac048f73599a610ca65bdb62762a	adenocarcinoma	0	0	no	200.286	0	no	male	68	80	169	28.0102	1	1	0	ICI+chemotherapy	Pembrolizumab	PD-1	1	0	1	0	0	0	0	0	0	0	0	0	0	0	0	0	0	0	0	0	165	144	4.36	0.42	0.95	0.21789	2.69	0.616972	173.684	2.83158
1008742101	c5149625d1b4ee2eab92bdf3906c14a8	adenocarcinoma	1	1	Arrhythmia	10	1	Ventricular Premature Beat (VPB)	male	49	84	175	27.4286	1	1	0	ICI+chemotherapy+antiangiogenic_therapy	Pembrolizumab	PD-1	1	0	1	0	0	0	0	1	0	0	0	0	0	1	1	0	0	0	0	0	310	126	4.46	0.11	0.69	0.154709	3.51	0.786996	449.275	5.08696
1008754488	2e6664ff75db9834e335e8261ef69e4e	adenocarcinoma	0	0	no	247.857	0	no	male	53	58	157	23.5304	0	1	0	ICI+chemotherapy+antiangiogenic_therapy	Nivolumab	PD-1	1	0	1	0	0	0	1	0	0	0	0	0	0	1	1	0	0	0	0	0	412	138	9.09	1.23	2.51	0.276128	5.02	0.552255	164.143	2
1008765585	d87f8441a5417fb51fbe2d7774d66c2c	SCC	0	0	no	119.714	0	no	female	54	61	161	23.533	0	0	0	ICI+chemotherapy	Sintilimab	PD-1	1	0	1	0	0	0	0	1	0	0	0	0	0	0	0	0	0	0	0	0	217	137	5.67	0.44	1.65	0.291005	3.46	0.610229	131.515	2.09697
1008778288	190b24728c8199a95be9d97d8b391cf7	adenocarcinoma	0	0	no	213.714	0	no	male	69	81	175	26.449	1	0	0	ICI+chemotherapy	Sintilimab	PD-1	1	1	0	0	0	0	0	0	0	0	0	0	0	0	0	0	0	0	1	0	130	125	8.55	1.07	1.86	0.217544	5.49	0.642105	69.8925	2.95161
1008814875	99d70dbf1c57707a7fd5da44dcb686f1	SCC	0	0	no	98.4286	0	no	female	60	60	160	23.4375	0	0	0	ICI+chemotherapy+antiangiogenic_therapy	Tislelizumab	PD-1	1	0	0	0	0	0	0	1	0	0	0	0	0	1	0	1	0	0	0	0	198	109	4.01	0.63	0.73	0.182045	2.61	0.650873	271.233	3.57534
1008814932	51cf03b5fcf4a6d902b6bac4ebf1cfa6	SCC	0	0	no	158	0	no	male	59	68	166	24.677	1	1	0	ICI+chemotherapy	Camilizumab	PD-1	1	0	0	0	0	1	0	1	0	0	0	0	0	0	0	0	0	0	0	0	176	121	4.06	0.35	0.76	0.187192	2.62	0.64532	231.579	3.44737
1008823425	e93c3a03080d7ecf35cfff1a4e1ce732	SCC	0	0	no	231.429	0	no	male	70	50	167	17.9282	1	0	0	ICI	Camilizumab	PD-1	0	0	0	0	0	0	0	0	0	0	0	0	0	0	0	0	0	0	1	0	242	79	5.84	0.44	1.2	0.205479	4.02	0.688356	201.667	3.35
1008839673	f099fc30d9786dfbadb6ec99d5e148eb	adenocarcinoma	0	0	no	129.429	0	no	female	54	53	150	23.3333	0	0	0	ICI+chemotherapy	Tislelizumab	PD-1	1	0	1	0	0	0	0	1	0	0	0	0	0	0	0	0	0	0	1	0	224	111	3.77	0.57	0.87	0.230769	2.1	0.557029	257.471	2.41379
1008843615	4a46f9f592ddd9323572dfe6ec5dc8fb	adenocarcinoma	1	1	Myocarditis	14	0	no	male	67	68	160	26.5625	1	1	0	ICI+chemotherapy+antiangiogenic_therapy	Sintilimab	PD-1	1	0	1	1	0	0	1	0	0	0	0	0	0	1	0	0	1	0	0	0	188	119	6.32	0.64	1.05	0.166139	4.42	0.699367	179.048	4.20952
1008847538	5bc112b30cd9d180b82be1bdd025786f	SCC	0	0	no	265.857	0	no	male	73	63	163	23.7118	0	0	0	ICI+chemotherapy	Pembrolizumab	PD-1	1	0	1	0	0	0	0	1	0	0	0	0	0	0	0	0	0	0	0	0	222	124	5.26	0.38	1.87	0.355513	2.89	0.54943	118.717	1.54545
1008873503	d885dffcc0d38467f832043a3e1b8f43	adenocarcinoma	0	0	no	226	0	no	female	69	58	168	20.5499	0	0	0	ICI+chemotherapy+antiangiogenic_therapy	Pembrolizumab	PD-1	1	0	1	1	0	0	1	0	0	0	0	0	0	1	1	1	0	0	0	0	256	140	4.5	0.41	0.79	0.175556	3.08	0.684444	324.051	3.89873
1008896477	06cbb5d7dc66f9a9745e134ea0fa89be	adenocarcinoma	0	0	no	87.7143	0	no	female	53	54	159	21.3599	0	0	0	ICI+chemotherapy+antiangiogenic_therapy	Camilizumab	PD-1	1	1	0	0	0	1	0	0	1	0	0	0	0	1	1	0	0	0	0	0	100	121	2.43	0.24	0.76	0.312757	1.34	0.55144	131.579	1.76316
1008902129	2774d7fb4941381c5365aa2580b43653	adenocarcinoma	0	0	no	251.143	0	no	male	61	76	178	23.9869	1	1	0	ICI+chemotherapy	Nivolumab	PD-1	1	0	1	1	0	0	1	1	0	0	0	0	0	0	0	0	0	1	1	0	238	82	10.03	0.81	1.51	0.150548	7.69	0.7667	157.616	5.09272
1008909385	1bc9f3dc3ccf5cab5d1f277b16174c1f	SCC	0	0	no	155.857	0	no	male	34	65	171	22.2291	1	0	0	ICI+chemotherapy	Sintilimab	PD-1	1	0	1	0	0	0	0	1	0	0	0	0	0	0	0	0	0	0	0	0	154	132	3.75	0.44	1.27	0.338667	1.98	0.528	121.26	1.55906
1008917569	b34b7c889404d7d504a518efc4dab40f	SCC	1	2	Myocarditis	40	0	no	male	60	90	170	31.1419	1	0	0	ICI	Tislelizumab	PD-1	0	0	0	0	0	0	0	0	0	0	0	0	0	0	0	0	0	0	1	0	227	141	5.42	0.67	0.81	0.149446	3.76	0.693727	280.247	4.64198
1008920235	f6a4238b62bc44ed1aab9ca4ff8fe50d	adenocarcinoma	0	0	no	188.571	0	no	female	54	44	147	20.3619	0	0	0	ICI	Pembrolizumab	PD-1	0	0	0	0	0	0	0	0	0	0	0	0	0	0	0	0	0	0	0	0	231	100	2.84	0.37	1.06	0.373239	1.4	0.492958	217.925	1.32075
1008924004	201d074517b9b7fd98f09e9c3d23a622	SCLC	0	0	no	151.571	0	no	female	73	38	155	15.9001	0	0	0	ICI	Camilizumab	PD-1	0	0	0	0	0	0	0	0	0	0	0	0	0	0	0	0	0	0	0	0	125	130	4.47	0.32	0.77	0.17226	3.35	0.749441	162.338	4.35065
1008933512	f4a94d9fa833a371433de384bbbef192	adenocarcinoma	0	0	no	181.857	0	no	female	48	65	160	25.3906	0	0	0	ICI+antiangiogenic_therapy	Sintilimab	PD-1	0	0	0	0	0	0	0	0	0	0	0	0	0	1	1	0	0	0	0	0	172	122	5	0.36	1.56	0.312	3	0.6	110.256	1.92308
1008934728	9c8dac0e24af76e51c60cff80c9d4a02	adenocarcinoma	0	0	no	158.571	0	no	male	61	72	165	26.4463	1	1	0	ICI+chemotherapy	Camilizumab	PD-1	1	1	0	0	0	0	0	0	0	0	0	0	0	0	0	0	0	0	1	0	262	138	8.18	0.97	0.94	0.114914	6.15	0.751834	278.723	6.54255
1008935629	5de9dcf63bb3514ca2dd8e5b7c5b4b59	adenocarcinoma	0	0	no	121	0	no	male	61	65	173	21.7181	1	0	0	ICI+chemotherapy	Pembrolizumab	PD-1	1	1	0	0	0	0	0	0	0	0	0	0	0	0	0	0	0	0	0	0	234	142	11.45	0.29	1.44	0.125764	9.7	0.847162	162.5	6.73611
1008939687	94036d805bbea35aaa076195e06485f3	adenocarcinoma	0	0	no	83.5714	0	no	female	61	58	168	20.5499	0	0	0	ICI+chemotherapy+antiangiogenic_therapy	Atezolizumab	PD-L1	1	1	0	0	0	0	0	0	1	0	0	0	0	1	1	0	0	0	0	0	216	120	4.72	0.28	1.2	0.254237	3.23	0.684322	180	2.69167
1008946077	31dfc6e4a7732acb0c34427dd056f5e2	SCC	0	0	no	248.286	0	no	male	69	83	176	26.7949	1	0	0	ICI+chemotherapy+antiangiogenic_therapy	Pembrolizumab	PD-1	1	0	0	1	0	0	1	0	0	0	0	0	0	1	1	0	0	0	0	0	208	116	5.35	1.06	1.92	0.358879	2.34	0.437383	108.333	1.21875
1008946302	c4473dbb81f7079ebb1fce0d747189e3	adenocarcinoma	0	0	no	240.714	0	no	male	69	73	165	26.8136	1	1	0	ICI+chemotherapy	Sintilimab	PD-1	1	1	0	0	0	0	0	1	0	0	0	0	0	0	0	0	0	0	0	0	294	148	5.02	0.55	0.95	0.189243	3.42	0.681275	309.474	3.6
1008946336	bf1c5f375890ac72fe60bf8067d0250e	adenocarcinoma	0	0	no	194.857	0	no	male	60	61	157	24.7475	1	1	0	ICI+chemotherapy+antiangiogenic_therapy	Tislelizumab	PD-1	1	0	1	1	0	0	0	0	0	0	0	0	0	1	1	1	0	0	1	0	380	102	8.75	0.57	1.28	0.146286	6.83	0.780571	296.875	5.33594
1008953812	75a432a4ad3e1b51b804e362422a8e4e	SCC	0	0	no	253	0	no	male	68	80	179	24.968	1	1	0	ICI+chemotherapy	Sintilimab	PD-1	1	0	1	0	0	0	0	1	0	0	0	0	0	0	0	0	0	0	0	0	167	133	7.54	0.33	1.78	0.236074	5.34	0.708223	93.8202	3
1008978322	e9a188adf99e7b620f785886d7d53595	SCC	1	2	Myocarditis	50	0	no	male	62	68	168	24.093	1	1	0	ICI	Sintilimab	PD-1	0	0	0	0	0	0	0	0	0	0	0	0	0	0	0	0	0	0	0	0	218	113	5.75	0.72	1.43	0.248696	3.31	0.575652	152.448	2.31469
1008986210	3e652b54e38992a8442f7ac4e271a64c	SCC	0	0	no	240	0	no	male	62	55	162	20.9572	1	0	0	ICI+chemotherapy	Pembrolizumab	PD-1	1	1	0	0	0	0	0	1	0	0	0	0	0	0	0	0	0	0	0	0	188	123	4.52	0.54	1.31	0.289823	2.59	0.573009	143.511	1.9771
1008987767	6096a0237cb33e93394d1742593d010d	SCC	0	0	no	158.857	0	no	male	65	75	179	23.4075	1	0	0	ICI+chemotherapy	Durvalumab	PD-L1	1	0	1	0	0	0	0	0	0	0	0	0	0	0	0	0	0	1	0	0	122	111	6.65	0.87	1.32	0.198496	4.13	0.621053	92.4242	3.12879
1008989977	c853a9bbb762136c64bbb81a54cf2f6b	SCC	0	0	no	150.286	0	no	male	72	59	167	21.1553	0	0	0	ICI+chemotherapy	Tislelizumab	PD-1	1	0	1	0	0	0	0	0	1	0	0	0	0	0	0	0	0	0	0	0	247	98	5.43	0.52	0.62	0.11418	3.71	0.683241	398.387	5.98387
1009003169	93a68f140dee9c3fa5bacc70edc3c2d3	SCC	0	0	no	143.143	0	no	male	59	55	151	24.1217	0	0	0	ICI+chemotherapy	Tislelizumab	PD-1	1	0	0	1	0	0	0	1	0	0	0	0	0	0	0	0	0	0	0	0	210	73	7.12	0.4	0.91	0.127809	5.57	0.782303	230.769	6.12088
1009011820	24bc9551a66d03ba887634b04820af6d	SCLC	0	0	no	174.429	0	no	male	59	65	172	21.9713	1	1	0	ICI	Sintilimab	PD-1	0	0	0	0	0	0	0	0	0	0	0	0	0	0	0	0	0	0	1	0	246	119	4.65	0.47	0.91	0.195699	3.12	0.670968	270.33	3.42857
1009028802	7cb9e6802171bfdefffd1dfe7029b333	SCC	0	0	no	122.429	0	no	male	47	91	179	28.4011	1	1	0	ICI+chemotherapy	Durvalumab	PD-L1	1	0	1	0	0	0	0	0	0	0	0	0	0	0	0	0	0	0	0	0	187	118	5.95	0.27	0.5	0.0840336	5.1	0.857143	374	10.2
1009032462	3bdc7f33ca13869f2d87fd727ace8732	SCC	0	0	no	143.429	0	no	male	69	76	172	25.6896	1	0	0	ICI	Pembrolizumab	PD-1	0	0	0	0	0	0	0	0	0	0	0	0	0	0	0	0	0	0	0	0	205	149	15.77	0.87	1.03	0.0653139	13.85	0.87825	199.029	13.4466
1009037763	3f9da7af959e4a2ce4518ffbc0d1adce	adenocarcinoma	0	0	no	35.5714	0	no	male	63	66	166	23.9512	0	1	0	ICI+chemotherapy	Tislelizumab	PD-1	1	0	0	1	0	0	0	1	0	0	0	0	0	0	0	0	0	0	1	0	177	138	4.16	0.4	0.56	0.134615	2.17	0.521635	316.071	3.875
1009040862	8cbe8d4bcc03196cc9659bf3b02febdb	SCC	0	0	no	180.857	0	no	female	36	49	160	19.1406	0	0	0	ICI+chemotherapy+antiangiogenic_therapy+targeted_therapy	Pembrolizumab	PD-1	1	1	0	0	0	0	0	1	0	1	0	0	1	1	1	1	0	0	0	0	311	85	3.95	0.41	0.71	0.179747	2.59	0.655696	438.028	3.64789
1009041520	b763ab7d75106604eb791c558d109472	SCLC	0	0	no	171.714	0	no	male	69	74	168	26.2188	1	1	0	ICI+chemotherapy	Tislelizumab	PD-1	1	0	1	0	1	0	1	0	0	0	0	0	0	0	0	0	0	0	1	0	204	88	7.4	0.19	1.05	0.141892	6.06	0.818919	194.286	5.77143
1009048531	68a443449526d362cc1dc66c74c17435	adenocarcinoma	0	0	no	215.429	0	no	female	63	54	161	20.8325	0	0	0	ICI+chemotherapy+antiangiogenic_therapy	Pembrolizumab	PD-1	1	0	0	0	0	0	0	0	1	0	0	0	0	1	1	0	0	0	0	0	290	114	4.68	0.78	1.09	0.232906	2.71	0.57906	266.055	2.48624
1009062821	b41b28c6a84778e8f9e3690bb4f447ee	SCC	0	0	no	158.571	0	no	female	57	58	158	23.2335	0	0	0	ICI+chemotherapy	Sintilimab	PD-1	1	0	1	0	0	0	0	1	0	0	0	0	0	0	0	0	0	0	0	0	94	91	5.17	0.16	1.45	0.280464	3.55	0.686654	64.8276	2.44828
1009063570	b2c8b65731fc7fe7aa622a7925e366ef	adenocarcinoma	0	0	no	160.857	0	no	male	62	69	171	23.597	1	1	1	ICI+chemotherapy+antiangiogenic_therapy	Nivolumab	PD-1	1	0	1	1	1	0	0	1	0	0	0	0	0	1	1	0	0	0	0	0	255	137	7.88	0.67	1.28	0.162437	5.73	0.727157	199.219	4.47656
1009069244	15a649b03c9d250b7657b4b54fa5d66b	SCC	0	0	no	233.429	0	no	male	55	63	166	22.8625	1	0	0	ICI+chemotherapy	Pembrolizumab	PD-1	1	0	1	0	0	0	0	1	0	0	0	0	0	0	0	0	0	0	0	0	130	120	6.47	0.5	1.88	0.290572	3.98	0.615147	69.1489	2.11702
1009080557	e6ea582309a87df9f14ee3c707b0a140	adenocarcinoma	0	0	no	217	0	no	male	77	70	167	25.0995	0	0	0	ICI+chemotherapy	Sintilimab	PD-1	1	1	0	0	0	0	0	0	0	0	0	0	0	0	0	0	0	0	0	0	180	87	5.22	0.56	2.25	0.431034	2.37	0.454023	80	1.05333
1009088312	e829625c92071103b535fb35915ce7de	SCC	0	0	no	122.571	0	no	male	83	50	171	17.1677	0	0	0	ICI+chemotherapy	Camilizumab	PD-1	1	0	0	1	0	0	0	0	0	0	0	0	0	0	0	0	0	0	1	0	225	130	7.86	0.93	1.56	0.198473	4.9	0.62341	144.231	3.14103
1009103741	3f244c49260fa5ed3cd7989d654686f7	SCC	0	0	no	241.571	0	no	male	73	60	165	22.0386	1	0	0	ICI+chemotherapy+antiangiogenic_therapy	Pembrolizumab	PD-1	1	1	0	0	0	0	0	0	1	0	0	0	0	1	0	1	0	0	1	0	274	130	8.35	0.85	2.04	0.244311	5.21	0.623952	134.314	2.55392
1009113247	e565a7a4c907b7d376ef48afc55549de	SCC	0	0	no	236.429	0	no	male	66	49	168	17.3611	1	1	0	ICI+chemotherapy	Sintilimab	PD-1	1	1	0	0	0	0	0	1	0	0	0	0	0	0	0	0	0	0	0	0	330	110	11.45	0.93	1.88	0.164192	8.41	0.734498	175.532	4.4734
1009122398	f7fbed8114f7a900eac8db7c5b5bb322	adenocarcinoma	0	0	no	81.5714	0	no	male	67	47	161	18.132	1	0	0	ICI+chemotherapy+antiangiogenic_therapy	Tislelizumab	PD-1	1	0	0	0	0	0	1	0	0	0	0	0	0	1	0	1	1	0	0	0	185	136	3.38	0.59	0.74	0.218935	1.98	0.585799	250	2.67568
1009135452	a4399efe207ec58dc4cebc743156dfc6	adenocarcinoma	0	0	no	232.571	0	no	male	56	60	157	24.3418	1	0	0	ICI+chemotherapy	Tislelizumab	PD-1	1	1	0	0	0	0	1	0	0	0	0	0	0	0	0	0	0	0	0	0	224	152	5.29	0.47	0.98	0.185255	3.72	0.703214	228.571	3.79592
1009137926	3852e84b6b84b5886fd120baa9799d42	adenocarcinoma	0	0	no	187	0	no	male	54	68	170	23.3564	0	0	0	ICI+chemotherapy	Tislelizumab	PD-1	1	0	1	0	0	0	0	1	0	0	0	0	0	0	0	0	0	0	0	0	178	124	24.33	1.55	2.94	0.120838	19.75	0.811755	60.5442	6.71769
1009143087	02b210f5314e01eff968cc73cda6b2da	adenocarcinoma	0	0	no	147.857	0	no	female	43	58	162	22.2527	0	0	0	ICI+chemotherapy	Toripalimab	PD-1	1	0	1	0	0	0	0	1	0	0	0	0	0	0	0	0	0	0	0	0	133	122	2.94	0.56	0.67	0.227891	1.56	0.530612	198.507	2.32836
1009148006	b4eeaa1471cbd4e9d1bb0ad2ae217dc4	SCC	0	0	no	160.571	0	no	male	60	65	167	23.3067	1	0	0	ICI+chemotherapy	Camilizumab	PD-1	1	0	1	0	0	0	1	0	0	0	0	0	0	0	0	0	0	0	0	0	244	126	6.86	1.38	2.08	0.303207	2.99	0.43586	117.308	1.4375
1009161827	0ac2b72d376c57358814b414ad738fba	adenocarcinoma	0	0	no	190.714	0	no	male	64	66	169	23.1084	1	0	0	ICI+chemotherapy	Tislelizumab	PD-1	1	0	1	0	0	0	0	0	0	0	0	0	0	0	0	0	0	0	0	0	278	149	8.38	0.8	1.45	0.173031	5.88	0.701671	191.724	4.05517
1009166196	c67b86110991a03a9c075b1f9c3e89dc	adenocarcinoma	0	0	no	179	0	no	male	69	53	165	19.4674	1	0	1	ICI+chemotherapy+antiangiogenic_therapy	Camilizumab	PD-1	1	1	0	0	0	0	0	1	1	0	0	0	0	1	1	0	0	0	0	0	432	117	9.17	0.95	1.15	0.125409	6.92	0.754635	375.652	6.01739
1009178384	57adbb017ff52ea739487de9ea23ff98	SCC	1	1	Pericarditis	24	0	no	male	70	83	170	28.7197	1	0	0	ICI+chemotherapy	Camilizumab	PD-1	1	0	0	0	0	0	0	1	0	0	0	0	0	0	0	0	0	0	0	0	144	140	4.57	0.23	1.06	0.231947	3.14	0.68709	135.849	2.96226
1009184339	e6a2917b3fd9b3ab947aab9c0f76179a	adenocarcinoma	0	0	no	147.857	0	no	male	68	58	160	22.6562	1	0	0	ICI+chemotherapy	Camilizumab	PD-1	1	0	1	0	0	0	0	0	0	0	0	0	0	0	0	0	0	0	0	0	276	127	8.11	0.63	1.64	0.202219	5.67	0.699137	168.293	3.45732
1009188234	2652c8ec79de0922a9cf5f711cc1b748	SCC	0	0	no	232.286	0	no	female	69	74	179	23.0954	0	0	0	ICI	Pembrolizumab	PD-1	0	0	0	0	0	0	0	0	0	0	0	0	0	0	0	0	0	0	0	0	237	121	7.99	0.63	2.05	0.256571	4.82	0.603254	115.61	2.35122
1009533451	a9585a319129aa2ad3c36285c51d7798	adenocarcinoma	0	0	no	160.286	0	no	female	59	56	159	22.151	0	0	0	ICI+chemotherapy+antiangiogenic_therapy	Sintilimab	PD-1	1	0	1	0	0	0	0	0	0	0	0	0	0	1	1	1	0	0	0	0	270	107	5.13	0.53	1.18	0.230019	3.29	0.641326	228.814	2.78814
1009533561	f27c3a565028492ca57688af5e51a8b2	adenocarcinoma	1	1	Arrhythmia	12	1	Left Anterior Fascicular Block (LAFB)	male	61	75	175	24.4898	1	0	0	ICI+chemotherapy	Pembrolizumab	PD-1	1	0	1	0	0	0	0	0	1	0	0	0	0	0	0	0	0	1	1	0	255	132	8.56	0.66	2.4	0.280374	4.89	0.571262	106.25	2.0375
1009535021	72b720ce4d5421c9aae10394bb1ae962	adenocarcinoma	0	0	no	234.857	0	no	male	54	56	170	19.3772	1	1	0	ICI+chemotherapy	Sintilimab	PD-1	1	1	0	1	0	0	1	1	0	0	0	0	0	0	0	0	0	0	0	0	398	123	6.14	0.83	2.67	0.434853	2.17	0.35342	149.064	0.812734
1009545253	7081b615e15d881026e954bb18dfad82	adenocarcinoma	0	0	no	178.571	0	no	male	62	71	167	25.4581	1	1	0	ICI+chemotherapy	Sintilimab	PD-1	1	0	0	0	0	1	0	0	1	0	0	0	0	0	0	0	0	1	1	0	159	85	4.17	0.38	0.7	0.167866	3.01	0.721823	227.143	4.3
1009546911	fc3f1c22043e383f88781ca8300cb4c8	adenocarcinoma	0	0	no	151.714	0	no	male	70	60	173	20.0474	1	0	0	ICI+chemotherapy	Camilizumab	PD-1	1	0	1	0	0	0	0	1	0	0	0	0	0	0	0	0	0	0	0	0	186	110	3.26	0.79	1.02	0.312883	1.44	0.441718	182.353	1.41176
1009547486	31e1315d15a6b13d71adf17c4b96d0cd	adenocarcinoma	0	0	no	151.286	0	no	male	60	66	165	24.2424	1	1	0	ICI+chemotherapy	Camilizumab	PD-1	1	0	1	0	0	0	1	1	0	0	0	0	0	0	0	0	0	0	0	0	208	105	7.13	0.83	1.09	0.152875	5.14	0.720898	190.826	4.7156
1009555035	b322edce7de69d1cb8a23d599ba4a4a5	adenocarcinoma	0	0	no	191.571	0	no	female	57	60	164	22.3081	0	0	0	ICI+chemotherapy	Sintilimab	PD-1	1	1	1	0	0	0	0	1	0	0	0	0	0	0	0	0	0	0	0	0	356	112	4.36	0.7	2.21	0.506881	1.37	0.31422	161.086	0.61991
1009557135	6ecff39090e728bbff76123436a0c72c	SCLC	0	0	no	225.714	0	no	male	67	49	159	19.3821	1	0	0	ICI	Pembrolizumab	PD-1	0	0	0	0	0	0	0	0	0	0	0	0	0	0	0	0	0	0	0	0	192	106	5.64	0.78	1.05	0.18617	3.72	0.659574	182.857	3.54286
1009576180	41f79ff40c7909235ef9bf17a5853169	SCC	0	0	no	226.571	0	no	male	72	65	168	23.03	1	0	0	ICI+chemotherapy	Camilizumab	PD-1	1	0	0	1	0	0	0	1	0	0	0	0	0	0	0	0	0	0	1	0	115	138	4.2	0.38	1.45	0.345238	2.02	0.480952	79.3103	1.3931
1009585961	59b33998a8afd54626c09c5cf35d10b4	SCC	0	0	no	108.857	0	no	male	61	60	176	19.3698	0	0	0	ICI+chemotherapy	Tislelizumab	PD-1	1	0	1	0	0	0	0	1	0	0	0	0	0	0	0	0	0	0	0	0	315	114	6.26	0.43	1.56	0.249201	4.19	0.669329	201.923	2.6859
1009586492	11d051f6f18f147f1157d323f0c3b44a	SCLC	0	0	no	149.571	0	no	male	62	80	178	25.2493	1	1	0	ICI+chemotherapy	Camilizumab	PD-1	1	0	0	0	0	1	0	1	0	0	0	0	0	0	0	0	0	0	0	0	134	108	3.99	0.34	1.19	0.298246	2.34	0.586466	112.605	1.96639
1009593744	4b4c11bf8d55d7b83155284c8f9849f8	SCLC	1	1	Arrhythmia	10	1	Right Bundle Branch Block (RBBB)	male	72	72	174	23.7812	1	0	0	ICI+chemotherapy	Tislelizumab	PD-1	1	0	0	0	1	1	0	1	1	0	0	0	0	0	0	0	0	0	1	0	174	136	10.67	0.75	1.83	0.171509	7.92	0.742268	95.082	4.32787
1009600295	95592a36e7605c44f860a688c9cc2243	SCC	0	0	no	178.429	0	no	female	72	57	166	20.6852	0	0	0	ICI	Nivolumab	PD-1	0	0	0	0	0	0	0	0	0	0	0	0	0	0	0	0	0	0	1	1	284	87	6.42	0.33	0.92	0.143302	5.11	0.79595	308.696	5.55435
1009604324	0e4c0946cb62257ca4b4d193a8a4f414	adenocarcinoma	0	0	no	94.7143	0	no	male	59	62	164	23.0518	1	0	0	ICI+antiangiogenic_therapy	Tislelizumab	PD-1	0	0	0	0	0	0	0	0	0	0	0	0	0	1	0	1	0	0	0	0	243	156	4.63	0.35	1.64	0.354212	2.51	0.542117	148.171	1.53049
1009621885	611ec0bdc88545572844f5c964a01bf1	adenocarcinoma	0	0	no	221.857	0	no	male	71	65	165	23.8751	1	1	0	ICI+chemotherapy	Camilizumab	PD-1	1	1	0	0	0	0	0	0	1	0	0	0	0	0	0	0	0	0	0	0	345	98	7.33	0.57	1.07	0.145975	5.65	0.770805	322.43	5.28037
1009643760	d5bbdd37c0f6d5de315e793acb77c8a4	adenocarcinoma	0	0	no	117.286	0	no	male	67	67	171	22.913	0	0	0	ICI+chemotherapy+antiangiogenic_therapy	Pembrolizumab	PD-1	1	0	1	0	0	0	1	1	0	0	0	0	0	1	0	0	1	0	0	0	117	125	4.36	0.14	0.15	0.0344037	4.04	0.926606	780	26.9333
1009652456	9887c29482e2b8c5d4020755aecf53ed	adenocarcinoma	0	0	no	229.571	0	no	female	69	65	167	23.3067	0	0	0	ICI+chemotherapy	Pembrolizumab	PD-1	1	0	0	1	0	0	0	0	0	0	0	0	0	0	0	0	0	0	1	0	245	114	4.25	0.64	1.43	0.336471	2.14	0.503529	171.329	1.4965
1009658572	b178efef2bace97aa187405aacad4b6d	adenocarcinoma	0	0	no	127.714	0	no	male	50	73	167	26.1752	0	1	0	ICI+chemotherapy	Tislelizumab	PD-1	1	1	1	0	0	0	0	0	0	0	0	0	0	0	0	0	0	0	0	0	132	150	7.52	0.57	1.33	0.176862	5.49	0.730053	99.2481	4.12782
1009660634	0810c1eabd9e67c7f8e1864c41ac5ff8	adenocarcinoma	0	0	no	118.571	0	no	male	51	46	162	17.5278	1	1	1	ICI+chemotherapy	Camilizumab	PD-1	1	0	1	0	0	0	1	0	0	0	0	0	0	0	0	0	0	0	0	0	189	138	9.11	0.46	1.59	0.174533	6.89	0.756312	118.868	4.33333
1009664032	aa5708a15d4829612bf5ddacdbe3be0d	adenocarcinoma	1	2	Myocarditis	16	0	no	male	57	65	170	22.4913	1	0	0	ICI+chemotherapy+antiangiogenic_therapy	Pembrolizumab	PD-1	1	1	0	0	0	0	1	0	0	0	0	0	0	1	0	0	1	0	0	0	216	133	3.48	0.4	0.6	0.172414	2.43	0.698276	360	4.05
1009674637	8627b862df0fc62964ec549b49060dda	SCC	0	0	no	117.857	0	no	male	70	65	170	22.4913	0	0	0	ICI	Sintilimab	PD-1	0	0	0	0	0	0	0	0	0	0	0	0	0	0	0	0	0	0	0	0	194	108	5.71	0.75	1.32	0.231173	3.5	0.61296	146.97	2.65152
1009674656	8bc5005f54e890c521dcb8957f4b61ee	SCC	0	0	no	220	0	no	male	68	70	161	27.0051	1	1	0	ICI+chemotherapy	Nivolumab	PD-1	1	1	0	0	0	0	1	0	0	0	0	0	0	0	0	0	0	0	0	0	238	139	8.64	0.8	1.62	0.1875	6.2	0.717593	146.914	3.82716
1009674952	0bc4f8aeb4477a93f2fd713a66da51f1	adenocarcinoma	0	0	no	153	0	no	male	69	65	175	21.2245	0	0	0	ICI+chemotherapy	Pembrolizumab	PD-1	1	0	0	0	0	0	0	1	0	0	0	0	0	0	0	0	0	0	0	0	248	75	8.9	0.41	0.74	0.0831461	7.71	0.866292	335.135	10.4189
1009678374	40b34e2bb58a88ae72bf42d18af0634b	SCLC	0	0	no	155.143	0	no	male	62	72	166	26.1286	1	1	0	ICI+chemotherapy	Tislelizumab	PD-1	1	0	0	0	0	1	0	0	0	0	0	0	0	0	0	0	0	0	0	0	223	116	7.01	0.5	0.82	0.116976	5.45	0.777461	271.951	6.64634
1009680816	f538f7a74e3541f8220dd4b579412648	NET	0	0	no	213.286	0	no	male	67	46	168	16.2982	0	0	0	ICI+chemotherapy	Pembrolizumab	PD-1	1	0	1	0	0	0	0	0	1	0	0	0	0	0	0	0	0	0	0	0	238	135	5.54	0.47	1.39	0.250903	3.6	0.649819	171.223	2.58993
1009681552	27f83297aa6247dd08250464513d5087	SCC	0	0	no	216.571	0	no	female	56	65	165	23.8751	0	0	0	ICI+chemotherapy	Pembrolizumab	PD-1	1	1	0	0	0	0	0	1	0	0	0	0	0	0	0	0	0	0	0	0	215	133	3.41	0.34	1.31	0.384164	1.6	0.469208	164.122	1.22137
1009691079	42a7ba0e878172e7a329dc6bc2f49637	SCC	0	0	no	191.286	0	no	male	57	75	173	25.0593	1	0	0	ICI	Toripalimab	PD-1	0	0	0	0	0	0	0	0	0	0	0	0	0	0	0	0	0	0	0	0	234	122	6.74	0.63	0.94	0.139466	5.01	0.743323	248.936	5.32979
1009695629	47e4f78c9937a2419ea99ee4c07684d6	adenocarcinoma	1	1	Arrhythmia	16	1	ST-Segment Change	male	59	55	174	18.1662	1	0	0	ICI+chemotherapy+antiangiogenic_therapy	Pembrolizumab	PD-1	1	0	1	0	0	0	0	0	1	0	0	0	0	1	1	0	0	0	0	0	268	121	9.18	1.03	1.67	0.181917	6.19	0.674292	160.479	3.70659
1009704022	5c7210d8d6f07ba4ae0028d538fdd20a	SCLC	0	0	no	215.571	0	no	female	50	46	166	16.6933	0	0	0	ICI+chemotherapy	Camilizumab	PD-1	1	1	0	0	0	0	0	0	1	0	0	0	0	0	0	0	0	0	0	0	226	131	9.31	0.62	1.29	0.138561	7.37	0.791622	175.194	5.71318
1009717754	6993cdf6c524a4f2f9b1244d3497e6a9	adenocarcinoma	0	0	no	159.857	0	no	male	74	67	162	25.5296	1	1	0	ICI+chemotherapy	Tislelizumab	PD-1	1	1	0	0	0	0	0	1	0	0	0	0	0	0	0	0	0	0	0	0	448	131	14.42	0.2	1.19	0.0825243	13.01	0.902219	376.471	10.9328
1009717938	96c47f7a241630b12a637e40ade85a9b	adenocarcinoma	0	0	no	215.429	0	no	male	60	80	167	28.6851	0	1	0	ICI+chemotherapy+antiangiogenic_therapy	Nivolumab	PD-1	1	0	1	1	1	0	1	1	0	0	0	0	0	1	0	1	0	0	0	0	247	118	5.91	0.27	1.15	0.194585	4.44	0.751269	214.783	3.86087
1009728526	c03fd2557a00a46bdba1db9b0ed613c0	adenocarcinoma	0	0	no	136.714	0	no	female	53	59	165	21.6713	0	0	0	ICI+chemotherapy	Camilizumab	PD-1	1	1	0	0	0	0	0	1	0	0	0	0	0	0	0	0	0	0	0	0	257	124	3.74	0.34	1.62	0.433155	1.73	0.462567	158.642	1.0679
1009729655	09877402c24621ec1caaeebc05e7a6e6	adenocarcinoma	0	0	no	213	0	no	male	58	51	156	20.9566	1	0	0	ICI+chemotherapy	Pembrolizumab	PD-1	1	1	0	0	0	0	0	1	0	0	0	0	0	0	0	0	0	0	0	0	432	121	4.26	0.53	1.68	0.394366	1.94	0.455399	257.143	1.15476
1009733608	b190ffe3f1860eb266920668bc0bc7a0	adenocarcinoma	0	0	no	157.429	0	no	female	68	67	164	24.9108	0	0	0	ICI	Nivolumab	PD-1	0	0	0	0	0	0	0	0	0	0	0	0	0	0	0	0	0	0	1	0	407	119	7.87	0.47	1.33	0.168996	5.96	0.757306	306.015	4.4812
1009749916	18910cbb4d985cec54f4793c419b3870	SCC	0	0	no	220.429	0	no	male	58	65	168	23.03	1	0	0	ICI+chemotherapy	Nivolumab	PD-1	1	0	0	1	0	0	0	1	0	0	0	0	0	0	0	0	0	0	0	0	725	98	29.41	1.73	3.91	0.132948	22.72	0.772526	185.422	5.81074
1009751122	dca4bbd850e3465f4ffe85bad889641e	adenocarcinoma	0	0	no	127	0	no	male	59	66	165	24.2424	1	1	0	ICI	Toripalimab	PD-1	0	0	0	0	0	0	0	0	0	0	0	0	0	0	0	0	0	0	0	0	176	120	3.2	0.43	0.54	0.16875	2.11	0.659375	325.926	3.90741
1009762700	1fe31ba596e7c541cb858d02fc24fd57	adenocarcinoma	0	0	no	154.857	0	no	male	52	65	163	24.4646	0	0	0	ICI+chemotherapy	Tislelizumab	PD-1	1	1	0	0	0	0	0	1	0	0	0	0	0	0	0	0	0	0	0	0	293	129	7.96	0.81	2.27	0.285176	4.56	0.572864	129.075	2.00881
1009780180	73ceecb41ae8be66dbe491b6f5b84f3a	SCLC	0	0	no	89.1429	0	no	male	70	70	172	23.6614	1	1	0	ICI	Tislelizumab	PD-1	0	0	0	0	0	0	0	0	0	0	0	0	0	0	0	0	0	0	0	0	211	104	5.46	0.37	0.63	0.115385	4.32	0.791209	334.921	6.85714
1009801139	3aaa499ec208d7b4a65d9a6fd9409af0	LCC	0	0	no	218.714	0	no	female	66	58	163	21.83	0	0	0	ICI+chemotherapy+antiangiogenic_therapy	Pembrolizumab	PD-1	1	0	1	1	0	0	1	1	0	0	0	0	0	1	0	1	1	0	1	0	108	127	12.05	0.66	1.3	0.107884	10.01	0.830705	83.0769	7.7
1009802543	1dbad68d0fc34e76760ebcf12690f086	adenocarcinoma	0	0	no	193.714	0	no	female	56	62	160	24.2188	0	0	0	ICI+chemotherapy+antiangiogenic_therapy	Camilizumab	PD-1	1	0	1	1	1	1	0	1	0	0	0	0	0	1	1	1	0	0	0	0	200	136	5.55	0.5	1.12	0.201802	3.7	0.666667	178.571	3.30357
1009811722	ba344c0f8f0d74ff6899b4fed6c90603	adenocarcinoma	0	0	no	162.714	0	no	male	56	48	161	18.5178	1	0	0	ICI+chemotherapy+antiangiogenic_therapy	Toripalimab	PD-1	1	1	0	0	0	0	1	0	1	0	0	0	0	1	0	0	1	0	0	0	256	97	4.42	0.56	0.48	0.108597	3.25	0.735294	533.333	6.77083
1009811940	72175c5485eb877958fe47e686d4a584	LCC	0	0	no	178.571	0	no	male	62	59	157	23.9361	1	0	1	ICI+chemotherapy	Tislelizumab	PD-1	1	0	1	0	0	0	0	0	0	0	0	0	0	0	0	0	0	0	0	0	320	106	5.89	0.49	0.69	0.117148	4.6	0.780985	463.768	6.66667
1009816164	031e5f00a77f904670ba0f82a06b02e1	SCLC	0	0	no	160.857	0	no	male	56	73	175	23.6735	1	1	0	ICI	Camilizumab	PD-1	0	0	0	0	0	0	0	0	0	0	0	0	0	0	0	0	0	0	0	0	36	113	4.2	0.46	0.93	0.221429	2.6	0.619048	38.7097	2.7957
1009823887	70957c57b916e75b6ccdb18ad6c86cda	SCLC	0	0	no	77.4286	0	no	male	55	85	177	27.1314	1	0	0	ICI+chemotherapy	Tislelizumab	PD-1	1	0	0	0	1	0	0	0	1	0	0	0	0	0	0	0	0	0	0	0	112	158	6.16	0.55	1.38	0.224026	4.08	0.662338	81.1594	2.95652
1009837439	ac1decb3711abbbf88f9e5aa06dd8584	SCC	0	0	no	166.857	0	no	male	69	58	172	19.6052	1	1	0	ICI+chemotherapy+antiangiogenic_therapy	Pembrolizumab	PD-1	1	0	0	1	0	0	0	0	0	0	0	0	0	1	0	1	0	0	0	0	188	138	4.82	0.52	1.56	0.323651	2.6	0.539419	120.513	1.66667
1009840185	824cf9c679d2e16cdc99ab753f9b582b	SCC	0	0	no	128.571	0	no	male	67	52	160	20.3125	1	1	0	ICI+chemotherapy+antiangiogenic_therapy	Pembrolizumab	PD-1	1	0	1	0	0	0	0	1	0	0	0	0	0	1	1	0	0	0	0	0	189	148	6.5	0.35	1.08	0.166154	5.05	0.776923	175	4.67593
1009845568	20228306ec9ee3fd7c9034738b8579e3	adenocarcinoma	0	0	no	161.714	0	no	male	64	66	173	22.0522	1	1	0	ICI+chemotherapy	Tislelizumab	PD-1	1	0	1	0	0	0	1	0	0	0	0	0	0	0	0	0	0	0	0	0	102	86	3.23	0.14	0.71	0.219814	2.3	0.712074	143.662	3.23944
1009849721	052150a2209bd7364ccb8ca01570383e	SCC	0	0	no	170.571	0	no	male	68	46	154	19.3962	1	0	0	ICI+chemotherapy	Camilizumab	PD-1	1	1	1	0	0	0	0	0	0	0	0	0	0	0	0	0	0	1	1	1	316	89	7.61	0.79	1.16	0.152431	5.36	0.704336	272.414	4.62069
1009850215	43263d3886abea8bf0e37f7cf89cc629	SCC	0	0	no	118.286	0	no	female	61	60	162	22.8624	0	0	0	ICI	Sintilimab	PD-1	0	0	0	0	0	0	0	0	0	0	0	0	0	0	0	0	0	0	0	0	182	90	8.03	0.88	0.44	0.0547945	6.54	0.814446	413.636	14.8636
1009866020	63eba3568831a468b6c24d84ef7fefea	SCC	0	0	no	164.857	0	no	male	53	53	167	19.0039	0	0	0	ICI+chemotherapy	Pembrolizumab	PD-1	1	1	0	0	0	0	0	1	0	0	0	0	0	0	0	0	0	0	0	0	220	116	3.76	0.75	0.53	0.140957	2.35	0.625	415.094	4.43396
1009874112	93c292164840d377e586f0496c95ad1d	SCC	0	0	no	171.286	0	no	male	71	57	173	19.0451	1	0	0	ICI+chemotherapy	Camilizumab	PD-1	1	1	0	0	0	0	0	0	1	0	0	0	0	0	0	0	0	0	0	0	422	116	8.44	0.71	2.01	0.238152	5.42	0.64218	209.95	2.69652
1009880369	662f9d86449e8892a561cb0e141136c2	SCC	0	0	no	151.571	0	no	male	69	83	178	26.1962	0	0	0	ICI+chemotherapy	Camilizumab	PD-1	1	1	0	0	0	0	0	0	1	0	0	0	0	0	0	0	0	0	1	0	325	99	4.29	1	1.3	0.30303	1.97	0.459207	250	1.51538
1009883585	c4a3fe1b8ada30b93b4d6357e22e15c8	adenocarcinoma	0	0	no	103.857	0	no	male	64	75	167	26.8923	1	0	0	ICI+chemotherapy	Camilizumab	PD-1	1	0	1	0	0	0	0	1	0	0	0	0	0	0	0	0	0	0	0	0	200	132	7.45	0.61	0.59	0.0791946	6.1	0.818792	338.983	10.339
1009884843	da013d2223e7736702c7da66bf285426	adenocarcinoma	0	0	no	172.571	0	no	male	76	65	172	21.9713	0	0	0	ICI	Camilizumab	PD-1	0	0	0	0	0	0	0	0	0	0	0	0	0	0	0	0	0	0	0	0	242	115	7.39	0.82	1.01	0.136671	5.33	0.721245	239.604	5.27723
1009887655	61eb687eb6e2ab916a2f2e0ca6e6d307	SCC	0	0	no	178.857	0	no	male	67	60	165	22.0386	0	0	0	ICI+chemotherapy+antiangiogenic_therapy	Nivolumab	PD-1	1	1	1	0	0	0	1	0	0	0	0	0	0	1	0	1	1	0	1	0	227	108	9.33	0.89	2.15	0.230439	5.95	0.637728	105.581	2.76744
1009894527	9e66940611da09656e8172d105db37f1	adenocarcinoma	0	0	no	80.1429	0	no	female	60	60	156	24.6548	0	0	0	ICI+chemotherapy+antiangiogenic_therapy	Tislelizumab	PD-1	1	0	1	0	0	0	0	1	0	0	0	0	0	1	1	0	0	0	0	0	275	124	9.38	0.84	2.22	0.236674	6.02	0.641791	123.874	2.71171
1009900082	cb9776cd5ffac8ac096cc72b4147caae	SCC	0	0	no	50	0	no	male	67	62	166	22.4996	0	0	0	ICI	Tislelizumab	PD-1	0	0	0	0	0	0	0	0	0	0	0	0	0	0	0	0	0	0	0	0	387	81	26.69	1.78	2.29	0.0857999	22.4	0.839266	168.996	9.78166
1009914205	06bd9d1612c9145ba29aa774a0da359b	adenocarcinoma	0	0	no	78.7143	0	no	male	58	76	175	24.8163	0	0	0	ICI+chemotherapy+antiangiogenic_therapy	Pembrolizumab	PD-1	1	1	0	0	0	0	1	0	0	0	0	0	0	1	1	0	0	0	0	0	172	123	3.52	0.35	0.92	0.261364	2.08	0.590909	186.957	2.26087
1009914473	631d738133e972c7907102b9c338cceb	SCLC	0	0	no	128.714	0	no	female	39	44	162	16.7657	0	0	0	ICI+chemotherapy	Durvalumab	PD-L1	1	0	0	0	1	0	1	0	0	0	0	0	0	0	0	0	0	0	0	0	331	135	9.31	0.66	1.4	0.150376	6.88	0.73899	236.429	4.91429
1009914750	e8a233f05eb152540cee46cb7920c369	SCC	0	0	no	186.429	0	no	male	77	65	169	22.7583	1	0	0	ICI+chemotherapy	Camilizumab	PD-1	1	0	1	0	0	0	0	0	1	0	0	0	0	0	0	0	0	0	1	0	133	125	3.33	0.16	0.82	0.246246	2.27	0.681682	162.195	2.76829
1009919374	ed061dab635635d21d06cda54df763cd	SCC	0	0	no	116.286	0	no	female	74	66	166	23.9512	0	0	0	ICI+chemotherapy	Pembrolizumab	PD-1	1	1	0	0	0	0	1	0	0	0	0	0	0	0	0	0	0	0	0	0	194	123	5.06	0.45	1.15	0.227273	3.21	0.634387	168.696	2.7913
1009932656	438c2abdc94b3cfb8645bcae0c12d8ea	SCC	1	1	Myocarditis	8	0	no	male	59	68	167	24.3824	0	0	0	ICI+chemotherapy	Pembrolizumab	PD-1	1	0	1	0	0	0	0	1	0	0	0	0	0	0	0	0	0	0	0	0	102	129	7.91	0.57	3.87	0.489254	3.27	0.413401	26.3566	0.844961
1009940349	5320b228988bc134c8e1207bcdc7737e	SCC	0	0	no	144	0	no	male	60	63	176	20.3383	1	0	0	ICI+chemotherapy+antiangiogenic_therapy	Camilizumab	PD-1	1	1	1	0	0	0	0	1	0	0	0	0	0	1	1	0	0	0	0	0	215	138	6.18	0.45	1.16	0.187702	4.38	0.708738	185.345	3.77586
1009945099	046e91ed916bda5d1fab6ee1f5f96657	SCC	0	0	no	171.571	0	no	female	52	53	154	22.3478	0	0	0	ICI+chemotherapy	Durvalumab	PD-L1	1	0	0	0	1	0	0	1	0	0	0	0	0	0	0	0	0	0	0	0	164	90	4.29	0.39	1.5	0.34965	2.37	0.552448	109.333	1.58
1009948437	d76ec810915b8c5df8e35ccefcdc2923	adenocarcinoma	0	0	no	162.429	0	no	male	54	70	172	23.6614	1	1	1	ICI+chemotherapy	Durvalumab	PD-L1	1	0	0	0	1	0	0	1	0	0	0	0	0	0	0	0	0	0	1	0	144	126	3.1	0.42	0.59	0.190323	1.95	0.629032	244.068	3.30508
1009950679	c5edef3c97e6f2e2cc1723a651519f70	adenocarcinoma	0	0	no	49.8571	0	no	male	57	75	162	28.578	0	0	0	ICI+chemotherapy+antiangiogenic_therapy	Tislelizumab	PD-1	1	0	0	1	0	0	0	0	0	0	0	0	0	1	1	0	0	1	0	1	227	105	5.35	0.27	1.62	0.302804	3.43	0.641121	140.123	2.11728
1009956073	d05ce29de87649f79567522758b73e7a	adenocarcinoma	0	0	no	56.8571	0	no	female	53	48	160	18.75	0	0	0	ICI	Tislelizumab	PD-1	0	0	0	0	0	0	0	0	0	0	0	0	0	0	0	0	0	0	0	0	46	87	3.76	0.29	0.95	0.25266	2.5	0.664894	48.4211	2.63158
1009956475	500b5d9d3124d7f2fa2e3cbc4ba542dc	SCC	1	1	Arrhythmia	3	1	Right Bundle Branch Block (RBBB), T-wave Abnormality	male	67	85	170	29.4118	0	0	0	ICI+chemotherapy+antiangiogenic_therapy	Pembrolizumab	PD-1	1	0	0	1	0	0	0	0	0	0	0	0	0	1	0	1	0	0	0	0	284	144	7.83	0.72	1.18	0.150702	5.65	0.721584	240.678	4.78814
1009962190	ffec5d6a390451e6e23d2e389b29a12b	SCC	0	0	no	93.5714	0	no	male	53	67	167	24.0238	1	0	0	ICI+chemotherapy	Pembrolizumab	PD-1	1	0	1	0	0	0	0	0	0	0	0	0	0	0	0	0	0	0	0	0	287	138	7.17	0.54	2.41	0.336123	3.97	0.553696	119.087	1.6473
1009970517	3e7ae12969cbccec1e13e89e04bd8209	SCLC	0	0	no	130	0	no	male	68	75	166	27.2173	0	0	0	ICI+chemotherapy	Durvalumab	PD-L1	1	0	0	0	0	1	0	1	0	0	0	0	0	0	0	0	0	0	0	0	102	148	5.09	0.38	1.28	0.251473	3.14	0.616896	79.6875	2.45312
1009974247	f38bf4e09af454b11ddf2608a32a434a	NET	0	0	no	172.429	0	no	male	61	70	173	23.3887	1	1	0	ICI+chemotherapy	Pembrolizumab	PD-1	1	1	0	0	0	0	1	0	0	0	0	0	0	0	0	0	0	0	0	0	303	142	7.5	0.5	1.85	0.246667	5.09	0.678667	163.784	2.75135
1009976966	602ea28f549002845389b8c95d9d61e7	adenocarcinoma	0	0	no	162.714	0	no	female	46	48	152	20.7756	0	0	0	ICI+chemotherapy	Camilizumab	PD-1	1	1	0	0	0	0	0	1	0	0	0	0	0	0	0	0	0	0	0	0	174	118	5.69	0.26	1.68	0.295255	3.65	0.641476	103.571	2.17262
1010007742	6863fd6f824b7d8bb61e07c73c053b5e	SCLC	0	0	no	141.286	0	no	male	63	58	161	22.3757	1	1	0	ICI	Atezolizumab	PD-L1	0	0	0	0	0	0	0	0	0	0	0	0	0	0	0	0	0	0	0	0	219	156	7.06	0.57	1.51	0.213881	4.81	0.681303	145.033	3.18543
1010008128	ea4b1077508716664a988c719d828495	SCC	0	0	no	125.429	0	no	male	63	58	169	20.3074	1	1	0	ICI+chemotherapy	Pembrolizumab	PD-1	1	1	0	0	0	0	0	0	0	0	0	0	0	0	0	0	0	0	0	0	210	146	6.42	0.62	2.04	0.317757	3.5	0.545171	102.941	1.71569
1010008716	e6e248b1226ab864b1db8f0b198c99c9	SCC	0	0	no	192.714	0	no	male	61	68	168	24.093	1	0	0	ICI+chemotherapy	Sintilimab	PD-1	1	1	0	0	0	0	0	1	0	0	0	0	0	0	0	0	0	0	0	0	423	105	13.05	1.28	3.52	0.269732	8.02	0.614559	120.17	2.27841
1010011017	9ece8b6f6d06d160ca3954646b0ab072	SCC	1	1	Pericarditis	32	0	no	male	65	74	160	28.9062	1	0	0	ICI+chemotherapy	Pembrolizumab	PD-1	1	0	1	0	0	0	0	1	0	0	0	0	0	0	0	0	0	0	0	0	214	129	4.45	0.11	1.11	0.249438	3.09	0.694382	192.793	2.78378
1010014507	39ec992505d2a3da8060b7b19759bb7e	SCC	0	0	no	181.286	0	no	male	55	67	168	23.7387	1	0	0	ICI+chemotherapy+antiangiogenic_therapy	Tislelizumab	PD-1	1	0	1	1	0	0	0	1	0	0	0	0	0	1	1	1	0	0	0	0	80	97	5.53	0.86	1.32	0.238698	3.31	0.598553	60.6061	2.50758
1010015550	3e4c23aa1e7944b8322a3d3fd11a7fc2	SCLC	0	0	no	104.429	0	no	male	77	68	170	23.5294	1	0	0	ICI+chemotherapy	Durvalumab	PD-L1	1	0	1	0	0	0	0	0	0	0	0	0	0	0	0	0	0	0	1	0	344	129	6.68	0.8	2.06	0.308383	3.69	0.552395	166.99	1.79126
1010018255	0da2f822bde5e930e230cc43981863ad	adenocarcinoma	1	1	Arrhythmia	8	1	ST-T Changes	male	83	85	174	28.075	1	1	0	ICI+antiangiogenic_therapy	Tislelizumab	PD-1	0	0	0	0	0	0	0	0	0	0	0	0	0	1	0	0	1	1	1	0	170	148	10.14	0.79	1.94	0.191321	6.72	0.662722	87.6289	3.46392
1010023638	e07f7f50f37ab45d758b8012a090e607	adenocarcinoma	0	0	no	170.143	0	no	male	73	81	179	25.2801	1	1	1	ICI+chemotherapy+antiangiogenic_therapy	Tislelizumab	PD-1	1	0	0	0	0	1	0	0	0	0	0	0	0	1	0	1	0	0	0	0	304	120	10.9	0.98	1.68	0.154128	8.15	0.747706	180.952	4.85119
1010025846	cf95a8ad812b0eec6b716fc3d72e07c8	adenocarcinoma	0	0	no	150	0	no	male	70	70	173	23.3887	1	0	0	ICI+chemotherapy+antiangiogenic_therapy	Tislelizumab	PD-1	1	1	1	0	0	0	0	0	0	0	0	0	0	1	0	1	0	0	0	0	210	125	6.57	0.84	1.89	0.287671	3.63	0.552511	111.111	1.92063
1010026811	87743dbb69c0862641172feb3f196607	SCC	0	0	no	159.429	0	no	male	70	52	152	22.5069	1	1	0	ICI+chemotherapy	Camilizumab	PD-1	1	0	0	0	1	0	0	1	0	0	0	0	0	0	0	0	0	0	0	0	181	117	13.03	1	1.92	0.147352	9.91	0.760553	94.2708	5.16146
1010027771	a4d3ca750f8a91d616a409733ef35460	SCC	0	0	no	97.8571	0	no	male	54	74	170	25.6055	1	0	1	ICI+chemotherapy	Sintilimab	PD-1	1	0	1	0	0	0	0	1	0	0	0	0	0	0	0	0	0	0	0	0	125	143	3.32	0.19	1.01	0.304217	2.03	0.611446	123.762	2.0099
1010030471	d17cf24c150da2f2eca5eaa082fb9cbc	SCC	0	0	no	157.714	0	no	female	56	50	158	19.9487	0	0	0	ICI+chemotherapy+antiangiogenic_therapy	Tislelizumab	PD-1	1	0	0	0	1	1	0	1	1	0	0	0	0	1	0	1	0	0	0	0	321	102	7.16	0.56	1.55	0.21648	5.01	0.699721	207.097	3.23226
1010037381	4dfe325b19a276a2f80f7ca13bbec66e	SCC	0	0	no	108.857	0	no	female	57	60	153	25.6312	0	0	0	ICI+chemotherapy	Toripalimab	PD-1	1	1	0	0	0	0	0	0	0	0	0	0	0	0	0	0	0	0	0	0	185	125	4.37	0.34	1.01	0.231121	2.81	0.643021	183.168	2.78218
1010039307	ad6b9b729370aae3d6dcbdef3765a578	SCC	0	0	no	176.286	0	no	male	62	70	177	22.3435	1	1	0	ICI+chemotherapy+antiangiogenic_therapy	Pembrolizumab	PD-1	1	0	1	1	0	0	1	1	0	0	0	0	0	1	0	1	0	0	0	0	312	117	6.87	0.68	0.73	0.106259	5.43	0.790393	427.397	7.43836
1010040558	bee3bebd859b4ed9a68c33c661776d38	sarcomatoid carcinoma	0	0	no	149.857	0	no	male	77	89	178	28.0899	1	0	0	ICI+chemotherapy+antiangiogenic_therapy	Tislelizumab	PD-1	1	0	0	0	0	1	0	0	0	0	0	0	0	1	0	1	0	0	1	0	101	126	3.9	0.21	1.25	0.320513	2.36	0.605128	80.8	1.888
1010066161	807930e13043936425c793e9a8bee1fc	adenocarcinoma	0	0	no	107.857	0	no	male	58	70	169	24.5089	0	0	0	ICI+chemotherapy	Atezolizumab	PD-L1	1	0	1	0	0	0	0	0	0	0	0	0	0	0	0	0	0	0	0	0	147	147	3.71	0.28	1.11	0.299191	2.23	0.601078	132.432	2.00901
1010069904	1b9426e64f79e0e1061d0fee3380f17f	adenocarcinoma	0	0	no	176.571	0	no	male	76	58	168	20.5499	1	0	0	ICI+chemotherapy	Durvalumab	PD-L1	1	0	0	0	1	0	0	0	0	0	0	0	0	0	0	0	0	1	0	1	256	113	8.95	0.66	1.94	0.21676	6.23	0.696089	131.959	3.21134
1010075846	ce3e7d978d6a3a8e44c6b3ca146d1fc6	adenocarcinoma	0	0	no	178.571	0	no	male	65	68	171	23.255	0	0	0	ICI+chemotherapy	Camilizumab	PD-1	1	1	0	0	0	0	0	1	0	0	0	0	0	0	0	0	0	0	0	0	192	127	8.62	0.83	1.59	0.184455	6.14	0.712297	120.755	3.86164
1010081568	d75aeece8e63001534fb6d34ec38743b	SCC	0	0	no	174.429	0	no	female	64	54	155	22.4766	0	0	1	ICI	Durvalumab	PD-L1	0	0	0	0	0	0	0	0	0	0	0	0	0	0	0	0	0	0	0	0	186	121	3.57	0.3	1.08	0.302521	2.15	0.602241	172.222	1.99074
1010091477	efc8c54450726a16b9764279a2fa26af	adenocarcinoma	0	0	no	159.571	0	no	female	56	58	151	25.4743	0	0	1	ICI+chemotherapy	Camilizumab	PD-1	1	0	1	0	0	0	0	0	0	0	0	0	0	0	0	0	0	1	0	0	287	129	7.69	0.44	2.24	0.291287	4.94	0.642393	128.125	2.20536
1010091629	b19205dde12cba9078c62a07f7861b3e	adenocarcinoma	0	0	no	160	0	no	male	42	76	179	23.7196	0	0	0	ICI	Pembrolizumab	PD-1	0	0	0	0	0	0	0	0	0	0	0	0	0	0	0	0	0	0	0	0	241	153	6.95	0.9	2.85	0.410072	2.87	0.41295	84.5614	1.00702
1010094307	f078d33ca2d32d6429b31d52e05e9ca8	adenocarcinoma	0	0	no	34.8571	0	no	male	66	76	165	27.9155	1	0	0	ICI+chemotherapy	Tislelizumab	PD-1	1	1	0	0	0	0	1	0	0	0	0	0	0	0	0	0	0	0	1	0	317	135	14.73	0.12	1.28	0.0868975	13.24	0.898846	247.656	10.3438
1010096329	078d5bcb29774d84b2f8be8835a82293	SCC	0	0	no	185.857	0	no	male	66	72	169	25.2092	0	0	0	ICI+chemotherapy	Pembrolizumab	PD-1	1	0	1	0	0	0	1	0	0	0	0	0	0	0	0	0	0	0	0	0	315	135	6.76	0.34	1.71	0.252959	4.18	0.618343	184.211	2.44444
1010099578	dc933986e1c5a224ac851bdf137a1ca6	adenocarcinoma	0	0	no	158.714	0	no	male	51	61	164	22.68	0	0	0	ICI+chemotherapy+antiangiogenic_therapy	Pembrolizumab	PD-1	1	0	1	0	0	0	0	0	0	0	0	0	0	1	0	1	0	0	0	0	131	94	5.44	0.8	1.19	0.21875	3.44	0.632353	110.084	2.89076
1010111443	b3e62b46d2f9ff114e0ca3d23b6c7d4d	adenocarcinoma	0	0	no	93.5714	0	no	female	53	55	165	20.202	0	0	0	ICI+chemotherapy	Camilizumab	PD-1	1	1	0	0	0	0	0	1	0	0	0	0	0	0	0	0	0	0	0	0	160	118	4.56	0.4	1.39	0.304825	2.62	0.574561	115.108	1.88489
1010116040	7298308a6b142e95c0a73d308e12e5bd	adenocarcinoma	0	0	no	152.286	0	no	male	66	82	176	26.4721	1	1	0	ICI+chemotherapy	Camilizumab	PD-1	1	1	0	0	0	0	0	0	1	0	0	0	0	0	0	0	0	1	0	0	365	116	7.01	0.71	1.57	0.223966	4.33	0.617689	232.484	2.75796
1010141943	106ee4ccd21e988b51e6e97475c74e65	SCC	0	0	no	172.429	0	no	male	46	62	165	22.7732	1	1	0	ICI+chemotherapy+antiangiogenic_therapy	Sintilimab	PD-1	1	0	1	0	0	0	1	0	0	0	0	0	0	1	0	1	0	0	0	0	162	114	4.98	0.52	1.47	0.295181	2.75	0.552209	110.204	1.87075
1010152030	738a62082a1545dd20812e4819fdd6c0	SCC	0	0	no	181.714	0	no	male	61	83	183	24.7843	1	1	1	ICI+chemotherapy	Pembrolizumab	PD-1	1	0	0	0	0	1	0	0	0	0	0	0	0	0	0	0	0	0	1	0	62	117	11.44	1.76	3.38	0.295455	5.79	0.506119	18.3432	1.71302
1010154066	5c927c6e7c3e628fa9de05bbbd6c566a	SCC	1	1	Arrhythmia	4	1	Sinus Tachycardia	female	36	44	155	18.3143	0	0	0	ICI+chemotherapy	Pembrolizumab	PD-1	1	0	1	0	0	0	0	1	0	0	0	0	0	0	0	0	0	0	0	0	195	129	4.54	0.25	0.79	0.174009	3.34	0.735683	246.835	4.22785
1010164881	fa8067a416f976c5eca70e13e4516735	SCC	0	0	no	104.286	0	no	male	61	65	168	23.03	1	0	0	ICI+chemotherapy+antiangiogenic_therapy	Tislelizumab	PD-1	1	0	0	0	0	1	0	0	0	0	0	0	0	1	1	0	0	0	0	0	152	96	3.89	0.71	0.79	0.203085	2.3	0.59126	192.405	2.91139
1010168040	16096d5b8fba53e0e988e5fa0abdd924	adenocarcinoma	0	0	no	154	0	no	male	63	90	165	33.0579	1	1	0	ICI	Durvalumab	PD-L1	0	0	0	0	0	0	0	0	0	0	0	0	0	0	0	0	0	0	0	0	111	112	2.95	0.18	0.83	0.281356	1.9	0.644068	133.735	2.28916
1010172220	9c0dcf5d71d5db80181815c91b092bfa	adenocarcinoma	0	0	no	187.429	0	no	male	52	75	165	27.5482	1	0	0	ICI+chemotherapy	Camilizumab	PD-1	1	1	0	0	0	0	1	0	0	0	0	0	0	0	0	0	0	1	0	0	248	148	10.19	0.73	2.03	0.199215	7.41	0.727184	122.167	3.65025
1010172888	54fbf8c090a75af071b05bad38198972	adenocarcinoma	0	0	no	161.714	0	no	male	62	60	179	18.726	1	0	0	ICI+chemotherapy+antiangiogenic_therapy	Durvalumab	PD-L1	1	0	0	0	1	1	1	0	1	0	0	0	0	1	0	1	0	0	0	0	227	100	5.25	0.98	0.72	0.137143	3.53	0.672381	315.278	4.90278
1010180431	f2c0d277bb485db3f60a1c23a6f505f2	adenocarcinoma	0	0	no	151.714	0	no	male	55	75	175	24.4898	0	0	0	ICI+chemotherapy+antiangiogenic_therapy	Camilizumab	PD-1	1	0	0	0	0	1	0	0	0	0	0	0	0	1	1	0	0	0	0	0	353	121	5.45	0.5	0.87	0.159633	3.94	0.722936	405.747	4.52874
1010180998	cb51c11474f1cddf4c9396e64a928df1	adenocarcinoma	0	0	no	164.714	0	no	female	70	65	163	24.4646	0	0	0	ICI+chemotherapy	Camilizumab	PD-1	1	0	0	0	0	0	1	1	0	0	0	0	0	0	0	0	0	0	0	0	115	118	4.08	0.29	0.8	0.196078	2.59	0.634804	143.75	3.2375
1010181565	5a9d7dc5d995cc91e992e2c6accc5807	adenocarcinoma	0	0	no	104.857	0	no	male	71	50	168	17.7154	1	0	0	ICI+chemotherapy	Sintilimab	PD-1	1	1	0	0	0	0	0	1	0	0	0	0	0	0	0	0	0	0	0	0	199	82	2.22	0.75	0.41	0.184685	0.76	0.342342	485.366	1.85366
1010184775	8a6605d744740e035e87056b5375e16b	SCC	0	0	no	173.571	0	no	female	56	62	170	21.4533	0	0	1	ICI+chemotherapy+antiangiogenic_therapy	Sintilimab	PD-1	1	0	1	0	0	0	0	1	0	0	0	0	0	1	0	1	0	0	0	0	250	127	6.66	0.67	1.8	0.27027	3.98	0.597598	138.889	2.21111
1010204341	8a691f542bd830f9158a7c3fbfc72fd5	adenocarcinoma	0	0	no	166	0	no	male	59	49	158	19.6283	0	0	0	ICI+antiangiogenic_therapy	Pembrolizumab	PD-1	0	0	0	0	0	0	0	0	0	0	0	0	0	1	1	0	0	0	0	0	410	95	11.73	1.49	0.81	0.0690537	9.41	0.802217	506.173	11.6173
1010213983	74666f7c06013e7e32f0adee37310e1a	SCC	0	0	no	186	0	no	male	68	60	169	21.0077	1	0	0	ICI+chemotherapy	Pembrolizumab	PD-1	1	0	0	1	0	0	0	1	0	0	0	0	0	0	0	0	0	0	0	0	605	132	7.67	1.2	1.74	0.226858	4.61	0.601043	347.701	2.64943
1010216113	56bc77927c349c34d58e42b48c885d88	adenocarcinoma	0	0	no	187.571	0	no	female	54	63	160	24.6094	0	0	0	ICI+chemotherapy	Tislelizumab	PD-1	1	1	1	0	0	0	0	1	0	0	0	0	0	0	0	0	0	0	0	0	298	124	3.24	0.29	0.96	0.296296	1.76	0.54321	310.417	1.83333
1010218845	f46cda0a1502cc1e820e2e9892e4ed3c	SCC	0	0	no	165.857	0	no	male	63	72	179	22.4712	1	1	0	ICI+chemotherapy	Tislelizumab	PD-1	1	0	1	0	0	0	1	0	0	0	0	0	0	0	0	0	0	0	0	0	233	143	5.65	0.65	1.38	0.244248	3.52	0.623009	168.841	2.55072
1010220208	dfd60662e09ced135f21f1f9678fb77c	adenocarcinoma	0	0	no	191.714	0	no	female	37	60	160	23.4375	0	0	0	ICI+chemotherapy	Sintilimab	PD-1	1	1	0	0	0	0	1	0	0	0	0	0	0	0	0	0	0	0	0	0	195	135	6.17	0.43	1.97	0.319287	3.49	0.56564	98.9848	1.77157
1010221013	209c4fd480d067971252d19f3e8f0fab	SCC	0	0	no	197.714	0	no	female	83	56	167	20.0796	0	0	0	ICI+chemotherapy	Atezolizumab	PD-L1	1	0	0	0	1	0	0	0	1	0	0	0	0	0	0	0	0	0	0	0	192	119	4.48	0.47	1.67	0.372768	2.09	0.466518	114.97	1.2515
1010231800	c55d34f80a511cfa346a08086a92aaab	SCLC	0	0	no	148	0	no	female	66	65	162	24.7676	1	0	0	ICI+chemotherapy	Durvalumab	PD-L1	1	0	0	0	1	0	1	0	0	0	0	0	0	0	0	0	0	0	0	0	200	138	5.39	0.47	1.99	0.369202	2.74	0.508349	100.503	1.37688
1010256657	fafd3108740cde510358df0541230716	adenocarcinoma	0	0	no	154.857	0	no	female	61	49	169	17.1563	0	0	0	ICI+chemotherapy	Pembrolizumab	PD-1	1	0	1	0	0	0	0	0	1	0	0	0	0	0	0	0	0	0	1	0	270	121	5.54	0.32	0.42	0.0758123	4.77	0.861011	642.857	11.3571
1010257998	056bff733961addb0a168250fecfcd46	adenocarcinoma	0	0	no	166.571	0	no	female	58	58	163	21.83	0	0	1	ICI+chemotherapy	Sintilimab	PD-1	1	0	0	0	0	0	0	1	0	0	0	0	0	0	0	0	0	0	0	0	393	128	5.3	0.52	1.64	0.309434	2.92	0.550943	239.634	1.78049
1010262097	83e75a6e053bb44863fca302ad22560b	adenocarcinoma	0	0	no	189.571	0	no	male	71	61	176	19.6927	1	1	0	ICI+chemotherapy	Camilizumab	PD-1	1	0	1	0	0	0	0	0	0	0	0	0	0	0	0	0	0	0	0	0	193	138	5.15	0.5	1.54	0.299029	2.95	0.572816	125.325	1.91558
1010263279	e7fa9c02c240e530b4d2be28fef4186c	adenocarcinoma	0	0	no	141.714	0	no	female	56	59	160	23.0469	0	0	0	ICI+chemotherapy+antiangiogenic_therapy	Tislelizumab	PD-1	1	0	0	1	0	0	0	0	0	0	0	0	0	1	1	0	0	0	0	0	258	109	11.96	0.61	1.69	0.141304	9.62	0.804348	152.663	5.69231
1010266854	71aedd4ebf5691db56a60065f3ab68a1	adenocarcinoma	0	0	no	187.857	0	no	female	61	55	175	17.9592	0	0	0	ICI+chemotherapy	Camilizumab	PD-1	1	0	0	0	0	0	0	1	0	0	0	0	0	0	0	0	0	0	0	0	394	129	16.07	1.07	2.88	0.179216	11.69	0.727442	136.806	4.05903
1010271554	c972c772c2a9cda66fdeef5249ba0362	SCC	0	0	no	84.7143	0	no	male	58	68	165	24.977	0	0	0	ICI+chemotherapy+antiangiogenic_therapy	Tislelizumab	PD-1	1	0	1	0	0	0	0	0	1	0	0	0	0	1	0	1	0	0	0	0	171	118	9.08	0.76	1.65	0.181718	6.57	0.723568	103.636	3.98182
1010271791	150a37353b3e4d05ef6a79feb24c0e16	adenocarcinoma	1	1	Arrhythmia	7	1	Atrial Premature Beat (APB)	female	60	55	158	22.0317	0	0	0	ICI+chemotherapy	Camilizumab	PD-1	1	0	0	0	1	0	0	0	0	0	0	0	0	0	0	0	0	0	0	0	211	132	6.72	0.66	1.54	0.229167	4.34	0.645833	137.013	2.81818
1010273925	0c838503a6f3c80bdab34b354a8a6161	SCC	0	0	no	193.571	0	no	female	49	55	167	19.721	0	0	0	ICI+chemotherapy	Pembrolizumab	PD-1	1	0	1	0	0	0	0	0	1	0	0	0	0	0	0	0	0	0	1	0	300	113	8.4	0.51	0.95	0.113095	6.68	0.795238	315.789	7.03158
1010274268	2ac89b44a1b27251a38cb77408b9f3a8	SCC	0	0	no	49.4286	0	no	male	53	81	167	29.0437	1	0	0	ICI+chemotherapy	Tislelizumab	PD-1	1	0	1	0	0	0	0	0	1	0	0	0	0	0	0	0	0	0	0	0	177	127	3.81	0.42	0.99	0.259843	2.24	0.587927	178.788	2.26263
1010279139	38d0308ae263fa26d41f322532a456f1	SCC	0	0	no	121.571	0	no	male	67	64	168	22.6757	1	1	0	ICI+chemotherapy	Pembrolizumab	PD-1	1	0	1	1	0	0	0	1	1	0	0	0	0	0	0	0	0	0	0	0	205	143	6.33	0.54	2.03	0.320695	3.62	0.57188	100.985	1.78325
1010303945	fd544ec8d3c31330075a60c6826178c9	SCC	0	0	no	161.857	0	no	male	71	76	174	25.1024	0	0	0	ICI+chemotherapy+antiangiogenic_therapy	Tislelizumab	PD-1	1	0	1	1	0	0	0	1	0	0	0	0	0	1	0	1	0	0	0	0	132	139	6.35	0.75	1.42	0.223622	4	0.629921	92.9577	2.8169
1010310500	cdd7d1ab772d932d72800240a28d62c5	SCC	0	0	no	183.286	0	no	male	67	80	176	25.8264	0	0	0	ICI+chemotherapy	Sintilimab	PD-1	1	0	0	1	0	0	0	0	0	0	0	0	0	0	0	0	0	0	0	0	471	106	5.68	0.15	1.05	0.184859	4.35	0.765845	448.571	4.14286
1010312218	b2f52a71e8f3df66ea8dcf0d01c7de82	adenocarcinoma	0	0	no	121.429	0	no	male	39	80	171	27.3588	0	0	1	ICI+chemotherapy+targeted_therapy	Sintilimab	PD-1	1	0	1	0	0	0	0	0	0	1	0	0	0	0	0	0	0	0	0	0	176	124	3.02	0.15	1.1	0.364238	1.58	0.523179	160	1.43636
1010312676	de0cda0ba10ead610176de8b32ec5d72	adenocarcinoma	0	0	no	181.286	0	no	male	62	62	166	22.4996	1	0	1	ICI+chemotherapy+antiangiogenic_therapy	Atezolizumab	PD-L1	1	0	0	0	1	1	1	1	0	0	0	0	0	1	0	0	1	0	0	0	205	125	7.04	0.48	1.53	0.21733	4.89	0.694602	133.987	3.19608
1010314410	0ce21fb67ac605172add01bb1ec3042a	adenocarcinoma	0	0	no	160.571	0	no	male	55	70	167	25.0995	1	1	0	ICI+chemotherapy+antiangiogenic_therapy	Pembrolizumab	PD-1	1	0	0	1	0	0	0	0	0	0	0	0	0	1	0	1	0	0	0	0	278	76	2.91	0.49	0.74	0.254296	1.61	0.553265	375.676	2.17568
1010314900	a0b0e6a6a308830097a84fa96cceebeb	adenocarcinoma	0	0	no	144.286	0	no	male	69	63	176	20.3383	1	0	0	ICI+chemotherapy	Durvalumab	PD-L1	1	0	1	0	0	0	0	0	0	0	0	0	0	0	0	0	0	0	0	0	205	89	5.58	0.51	1.53	0.274194	3.39	0.607527	133.987	2.21569
1010316270	74cfd8e1ac66c17027a1383f888941ee	adenocarcinoma	0	0	no	60.8571	0	no	female	61	63	165	23.1405	0	0	0	ICI+chemotherapy	Tislelizumab	PD-1	1	1	0	0	0	0	0	0	0	0	0	0	0	0	0	0	0	0	0	0	173	126	2.64	0.41	0.87	0.329545	1.3	0.492424	198.851	1.49425
1010317722	a81dc2565ecbbe7d3d0208d0013e6569	adenocarcinoma	0	0	no	153.571	0	no	male	70	62	160	24.2188	1	0	1	ICI+chemotherapy	Sintilimab	PD-1	1	0	1	0	0	0	0	0	0	0	0	0	0	0	0	0	0	0	0	0	315	120	3.63	0.39	1.55	0.426997	1.58	0.435262	203.226	1.01935
1010321560	982bd4b185cb815a053f446ff9025cb1	adenocarcinoma	1	2	Myocarditis	30	0	no	male	58	77	181	23.5036	1	0	1	ICI+chemotherapy+antiangiogenic_therapy	Pembrolizumab	PD-1	1	1	0	0	0	0	0	0	1	0	0	0	0	1	1	0	0	0	0	0	267	128	9.59	0.81	1.06	0.110532	6.99	0.728884	251.887	6.59434
1010333521	44e20c4fe612c20958f8318fadc58872	adenocarcinoma	0	0	no	152.857	0	no	male	69	80	181	24.4193	1	1	0	ICI+chemotherapy	Pembrolizumab	PD-1	1	1	0	0	0	0	0	0	0	0	0	0	0	0	0	0	0	0	0	0	294	140	12.2	0.89	1.5	0.122951	9.76	0.8	196	6.50667
1010333578	0431285e16cdb2f7b735607a2ce33d53	adenocarcinoma	0	0	no	161.857	0	no	female	54	51	161	19.6752	0	0	0	ICI+chemotherapy+antiangiogenic_therapy	Camilizumab	PD-1	1	0	1	1	1	1	0	0	0	0	0	0	0	1	1	1	0	0	0	0	366	124	10.69	0.91	3.08	0.28812	6.65	0.622077	118.831	2.15909
1010341604	1e5873c9e61c409bb19566e3937000c5	adenocarcinoma	0	0	no	166.714	0	no	female	68	57	152	24.6711	0	0	0	ICI+chemotherapy	Camilizumab	PD-1	1	1	0	0	0	0	1	1	0	0	0	0	0	0	0	0	0	0	0	0	271	106	6.96	0.48	1.46	0.20977	4.9	0.704023	185.616	3.35616
1010347087	c472560337717b7acf18c3c160f58829	SCC	0	0	no	127.571	0	no	male	50	70	166	25.4028	1	0	0	ICI+chemotherapy	Pembrolizumab	PD-1	1	0	1	0	0	0	0	1	0	0	0	0	0	0	0	0	0	0	0	0	183	119	5.95	0.59	1.35	0.226891	3.84	0.645378	135.556	2.84444
1010350775	5a027581539b3bdd1fc90f950e694686	SCC	0	0	no	136.429	0	no	male	73	60	166	21.7738	1	1	0	ICI+chemotherapy	Pembrolizumab	PD-1	1	0	1	0	0	0	0	1	0	0	0	0	0	0	0	0	0	1	0	0	159	71	5.7	0.29	0.75	0.131579	4.58	0.803509	212	6.10667
1010358964	13873e8dc90233ef3cbfe9d17b3d02d8	adenocarcinoma	0	0	no	130.429	0	no	male	71	57	168	20.1956	1	0	0	ICI+chemotherapy	Camilizumab	PD-1	1	1	0	0	0	0	1	0	0	0	0	0	0	0	0	0	0	0	0	0	312	130	9.04	0.65	2.82	0.311947	5.24	0.579646	110.638	1.85816
1010361813	2235db7558e266b626f74f79e8dfbfd9	SCLC	0	0	no	135.429	0	no	female	52	63	174	20.8086	0	0	0	ICI+chemotherapy	Durvalumab	PD-L1	1	0	0	0	1	0	0	0	1	0	0	0	0	0	0	0	0	0	1	0	348	134	5.07	0.4	1.95	0.384615	2.68	0.5286	178.462	1.37436
1010361893	62c778ca31003d1c06e4245659debf76	SCC	0	0	no	139.857	0	no	male	65	70	177	22.3435	0	0	0	ICI+chemotherapy	Pembrolizumab	PD-1	1	0	1	0	0	0	1	1	0	0	0	0	0	0	0	0	0	0	1	0	339	134	7.36	0.5	1.91	0.259511	4.76	0.646739	177.487	2.49215
1010363532	d74c9e600a068708436f87b132645eb3	SCC	0	0	no	121.714	0	no	male	66	70	163	26.3465	1	0	0	ICI	Pembrolizumab	PD-1	0	0	0	0	0	0	0	0	0	0	0	0	0	0	0	0	0	0	0	0	135	128	5.53	0.21	0.9	0.162749	4.32	0.781193	150	4.8
1010367933	d99ebe654dfd2b0ea5e71f6281748bf2	SCC	0	0	no	155.286	0	no	male	59	73	169	25.5593	1	0	0	ICI+chemotherapy+antiangiogenic_therapy	Pembrolizumab	PD-1	1	0	1	1	0	0	0	1	0	0	0	0	0	1	0	1	0	0	0	0	361	104	7.91	0.6	1.87	0.23641	5.08	0.642225	193.048	2.71658
1010377353	402689609f8b8e9d8434c1560878b65f	adenocarcinoma	0	0	no	157.714	0	no	male	68	62	171	21.2031	1	1	0	ICI	Camilizumab	PD-1	0	0	0	0	0	0	0	0	0	0	0	0	0	0	0	0	0	0	0	0	303	121	6.82	0.67	1.99	0.291789	3.7	0.542522	152.261	1.8593
1010382580	1bfec7080da0b7bd3bbb205ba1a99aff	adenocarcinoma	0	0	no	52.4286	0	no	male	65	76	166	27.5802	1	1	0	ICI+chemotherapy	Tislelizumab	PD-1	1	0	1	0	0	0	0	0	1	0	0	0	0	0	0	0	0	0	0	1	206	134	6.08	0.46	1.39	0.228618	3.91	0.643092	148.201	2.81295
1010392778	6d1fa81f68572ad2269a05330d856fbd	SCLC	0	0	no	75.7143	0	no	male	59	61	170	21.1073	1	1	0	ICI	Tislelizumab	PD-1	0	0	0	0	0	0	0	0	0	0	0	0	0	0	0	0	0	0	0	0	307	101	4.57	0.8	1.03	0.225383	2.56	0.560175	298.058	2.48544
1010392802	04d76fa0bd2b018f7dd53ec3e4152eb5	NET	0	0	no	158.571	0	no	male	72	56	156	23.0112	1	0	0	ICI+chemotherapy+antiangiogenic_therapy	Pembrolizumab	PD-1	1	1	0	0	0	0	0	1	0	0	0	0	0	1	0	0	1	0	0	0	254	157	20.02	1.77	1.02	0.0509491	15.34	0.766234	249.02	15.0392
1010399534	13544bfa53608d6ee65293244668ec31	SCC	0	0	no	92.4286	0	no	female	59	45	162	17.1468	0	0	0	ICI+chemotherapy+antiangiogenic_therapy	Atezolizumab	PD-L1	1	1	1	0	0	0	0	0	1	0	0	0	0	1	1	0	0	0	0	0	201	117	2.93	0.4	1.14	0.389078	1.33	0.453925	176.316	1.16667
1010401708	424fdcbcf664afbd5f0793928cd0e6c7	adenocarcinoma	0	0	no	148	0	no	male	59	84	175	27.4286	1	0	0	ICI+chemotherapy	Tislelizumab	PD-1	1	1	0	0	0	0	1	0	0	0	0	0	0	0	0	0	0	1	0	0	391	124	6.87	0.67	2.03	0.295488	3.93	0.572052	192.611	1.93596
1010402323	dac38407c6525fc9a3def5ea9104dabd	SCC	0	0	no	148.857	0	no	male	61	70	169	24.5089	1	0	0	ICI+chemotherapy+antiangiogenic_therapy	Pembrolizumab	PD-1	1	1	1	0	0	0	0	1	0	0	0	0	0	1	1	1	0	0	1	0	604	153	20.78	2.39	3.47	0.166987	14.89	0.716554	174.063	4.29107
1010403390	e47886832dcf270d19c6e932618c82cf	adenocarcinoma	0	0	no	57.8571	0	no	female	65	60	163	22.5827	0	0	0	ICI+chemotherapy+antiangiogenic_therapy	Toripalimab	PD-1	1	0	0	0	0	0	0	1	0	0	0	0	0	1	0	1	0	0	0	0	172	122	8.02	0.44	2.48	0.309227	4.9	0.610973	69.3548	1.97581
1010403673	d085b45a3dab5fc4fc5f00a19d630aab	adenocarcinoma	0	0	no	146.571	0	no	male	61	57	170	19.7232	1	0	0	ICI+chemotherapy+antiangiogenic_therapy	Sintilimab	PD-1	1	1	0	0	0	0	0	1	0	0	0	0	0	1	0	0	1	0	0	0	179	126	6.52	0.3	1.18	0.180982	4.92	0.754601	151.695	4.16949
1010409620	f141de48b5e7214db94a0899d2b62668	SCC	0	0	no	127.857	0	no	male	55	46	172	15.5489	1	0	0	ICI+chemotherapy	Sintilimab	PD-1	1	0	1	0	0	0	1	1	0	0	0	0	0	0	0	0	0	1	0	0	203	112	8.1	0.68	0.88	0.108642	6.38	0.787654	230.682	7.25
1010410505	c90b536727239fc91353d30ef7435c1e	adenocarcinoma	1	1	Myocarditis	34	0	no	female	36	50	165	18.3655	0	0	0	ICI+chemotherapy+antiangiogenic_therapy	Durvalumab	PD-L1	1	0	1	0	0	0	0	0	0	0	0	0	0	1	0	1	0	0	0	0	188	100	2.51	0.47	0.33	0.131474	1.65	0.657371	569.697	5
1010411506	751b4565ad3949a437153e4ab8da1d2d	adenocarcinoma	0	0	no	64.1429	0	no	male	65	60	167	21.5139	1	1	0	ICI+chemotherapy	Sintilimab	PD-1	1	1	0	0	0	0	0	1	0	0	0	0	0	0	0	0	0	0	0	0	240	131	5.74	0.55	0.96	0.167247	3.94	0.686411	250	4.10417
1010412778	d64eadde61328d3d43ef650c46c8940b	SCC	0	0	no	151.286	0	no	male	69	55	167	19.721	1	0	0	ICI	Pembrolizumab	PD-1	0	0	0	0	0	0	0	0	0	0	0	0	0	0	0	0	0	0	0	0	207	82	5.22	0.67	1.23	0.235632	3.27	0.626437	168.293	2.65854
1010416926	05b81aa0c60cc69fef13e733d7c09def	SCC	1	1	Myocarditis	52	0	no	female	31	48	171	16.4153	0	0	0	ICI+chemotherapy+antiangiogenic_therapy	Pembrolizumab	PD-1	1	0	1	1	0	0	1	0	0	0	0	0	0	1	1	0	1	0	0	0	265	139	4.52	0.66	1.3	0.287611	2.43	0.537611	203.846	1.86923
1010417052	be85e81d33cf224acbd1dbc2a39fe3c9	SCC	0	0	no	147.714	0	no	male	57	75	165	27.5482	1	1	0	ICI+chemotherapy+antiangiogenic_therapy	Tislelizumab	PD-1	1	0	0	0	0	1	0	1	0	0	0	0	0	1	0	1	0	0	0	0	218	110	6.65	0.61	2.1	0.315789	3.85	0.578947	103.81	1.83333
1010424961	ee8cfcc7b21f48eb697f224182965870	SCC	0	0	no	152	0	no	male	71	51	163	19.1953	1	0	0	ICI+antiangiogenic_therapy	Camilizumab	PD-1	0	0	0	0	0	0	0	0	0	0	0	0	0	1	0	1	0	0	1	1	133	104	5.83	0.6	1.22	0.209262	3.82	0.655232	109.016	3.13115
1010428922	ab85d637122a899befa1f705ffb259cd	adenocarcinoma	0	0	no	162.714	0	no	male	76	73	173	24.3911	0	0	0	ICI+chemotherapy+antiangiogenic_therapy	Camilizumab	PD-1	1	0	1	1	0	0	1	1	0	0	0	0	0	1	1	0	0	0	0	0	295	107	5.81	0.16	1.36	0.234079	4.26	0.733219	216.912	3.13235
1010438762	2a6a7bc5092d12ff8c4ff47ddfde2d9c	adenocarcinoma	0	0	no	140.571	0	no	female	63	62	170	21.4533	1	0	0	ICI	Pembrolizumab	PD-1	0	0	0	0	0	0	0	0	0	0	0	0	0	0	0	0	0	0	0	0	309	122	3.87	0.27	1.42	0.366925	2.12	0.547804	217.606	1.49296
1010442413	5c19853912d5a32cd63b53cadacebd30	adenocarcinoma	0	0	no	120.857	0	no	female	48	55	160	21.4844	0	0	0	ICI+antiangiogenic_therapy	Sintilimab	PD-1	0	0	0	0	0	0	0	0	0	0	0	0	0	1	0	1	0	0	0	0	56	81	4.61	0.61	0.89	0.193059	2.94	0.637744	62.9213	3.30337
1010445021	2fcddd9e1f85811c771f557d1c861086	adenocarcinoma	0	0	no	149.571	0	no	female	70	53	159	20.9644	0	0	0	ICI+chemotherapy+antiangiogenic_therapy	Camilizumab	PD-1	1	1	1	0	0	0	0	0	1	0	0	0	0	1	1	1	0	0	0	0	172	123	4.05	0.59	0.88	0.217284	2.51	0.619753	195.455	2.85227
1010445432	cb66c9994f829cbf3074d1f9c641ed82	SCC	0	0	no	148.857	0	no	male	67	60	157	24.3418	1	0	0	ICI+chemotherapy	Camilizumab	PD-1	1	0	1	0	0	0	0	1	0	0	0	0	0	0	0	0	0	0	0	0	252	92	4.74	0.03	0.5	0.105485	4.2	0.886076	504	8.4
1010445501	b7ab5fa72c0737f06a46ef571446774d	SCC	0	0	no	156.857	0	no	male	77	65	162	24.7676	1	1	0	ICI+chemotherapy	Pembrolizumab	PD-1	1	0	1	0	0	0	1	0	0	0	0	0	0	0	0	0	0	0	0	0	175	118	4.82	0.2	0.36	0.0746888	4.15	0.860996	486.111	11.5278
1010457214	0e1002667a21f431e3d3b1326134a10a	SCLC	0	0	no	78.5714	0	no	female	56	50	160	19.5312	0	0	1	ICI+chemotherapy	Atezolizumab	PD-L1	1	0	0	0	1	0	1	0	0	0	0	0	0	0	0	0	0	0	0	0	131	127	5.22	0.2	1.09	0.208812	3.88	0.743295	120.183	3.55963
1010463651	c0bb9e3d465e2bddf5493528697d5979	SCC	0	0	no	104.714	0	no	male	50	69	180	21.4198	1	1	0	ICI+chemotherapy	Tislelizumab	PD-1	1	0	0	0	0	0	0	0	1	0	0	0	0	0	0	0	0	0	0	0	225	127	7.05	0.62	0.81	0.114894	5.51	0.78156	277.778	6.80247
1010468613	2d20bd5cdc4a6736c295b8ac879fd583	adenocarcinoma	0	0	no	144.429	0	no	male	62	47	162	17.9089	0	0	1	ICI	Sintilimab	PD-1	0	0	0	0	0	0	0	0	0	0	0	0	0	0	0	0	0	0	0	0	204	157	11.43	0.85	1.8	0.15748	8.61	0.753281	113.333	4.78333
1010469422	10f8f8bdb45a8215ec647d59caac5407	adenocarcinoma	0	0	no	40.5714	0	no	male	71	52	167	18.6453	1	0	0	ICI+chemotherapy	Tislelizumab	PD-1	1	0	1	0	0	0	0	0	1	0	0	0	0	0	0	0	0	0	0	0	319	138	5.51	0.44	1.75	0.317604	3.21	0.582577	182.286	1.83429
1010470905	b290ae6d2c95aa6ab6e7d12e02d54bf6	adenocarcinoma	1	1	Myocarditis	24	0	no	male	66	56	170	19.3772	1	1	0	ICI+chemotherapy	Camilizumab	PD-1	1	1	1	0	0	0	0	1	1	0	0	0	0	0	0	0	0	0	0	0	148	125	5.85	0.49	1.39	0.237607	3.83	0.654701	106.475	2.7554
1010470946	3ef30dc9a7338f0e72a53b89315c0669	SCC	0	0	no	160	0	no	male	66	69	165	25.3444	0	0	0	ICI+chemotherapy	Tislelizumab	PD-1	1	0	1	0	0	0	0	1	0	0	0	0	0	0	0	0	0	0	0	0	145	116	5.75	0.55	0.81	0.14087	4.26	0.74087	179.012	5.25926
1010471247	6d659ea6a34f990afb3e63fb866b635a	NSCLC	0	0	no	148.571	0	no	male	62	52	166	18.8707	1	1	0	ICI	Camilizumab	PD-1	0	0	0	0	0	0	0	0	0	0	0	0	0	0	0	0	0	0	0	0	365	134	69.91	4.37	4.33	0.0619368	59.94	0.857388	84.2956	13.843
1010472766	89ef262d30fe26f58ed8523b84be4efa	adenocarcinoma	0	0	no	98.8571	0	no	female	69	64	157	25.9645	0	0	1	ICI+chemotherapy	Tislelizumab	PD-1	1	0	1	0	0	0	0	0	1	0	0	0	0	0	0	0	0	0	0	0	154	111	5.7	0.55	2.35	0.412281	2.58	0.452632	65.5319	1.09787
1010479566	199aed8de9d5f79d0948d23be1f5f49e	adenocarcinoma	0	0	no	122.143	0	no	female	53	57	160	22.2656	0	0	0	ICI+chemotherapy+antiangiogenic_therapy	Camilizumab	PD-1	1	1	0	0	0	0	1	1	0	0	0	0	0	1	1	1	0	0	0	0	270	145	8.18	0.48	2.8	0.342298	4.8	0.586797	96.4286	1.71429
1010485980	a935da4c26f490a3facdbd59d82d7a6a	SCC	0	0	no	135.714	0	no	male	56	60	167	21.5139	0	0	0	ICI+chemotherapy	Durvalumab	PD-L1	1	0	0	1	0	0	0	1	0	0	0	0	0	0	0	0	0	0	0	0	236	123	4.48	0.41	1.43	0.319196	2.52	0.5625	165.035	1.76224
1010486149	49f8ca1f7d8f9aec5a9e34265ae83844	adenocarcinoma	0	0	no	169.714	0	no	male	70	75	169	26.2596	1	1	0	ICI+chemotherapy	Tislelizumab	PD-1	1	0	1	0	0	0	0	0	1	0	0	0	0	0	0	0	0	0	1	0	185	115	6.93	0.57	1.6	0.23088	4.58	0.660895	115.625	2.8625
1010492716	3b95d9d4c619eef2dd4738a773bd0197	adenocarcinoma	1	1	Myocarditis	10	0	no	female	61	58	156	23.833	0	0	0	ICI+chemotherapy+antiangiogenic_therapy	Camilizumab	PD-1	1	0	1	0	0	0	1	0	0	0	0	0	0	1	0	0	1	0	0	0	272	143	7.56	0.45	2.55	0.337302	4.46	0.589947	106.667	1.74902
1010494080	1e9904939a2d3c6961b27e6674b26284	adenocarcinoma	0	0	no	164.571	0	no	male	54	73	173	24.3911	0	0	0	ICI+chemotherapy	Camilizumab	PD-1	1	0	0	1	0	0	0	0	0	0	0	0	0	0	0	0	0	0	1	0	214	120	7.42	0.49	2.13	0.287062	4.72	0.636119	100.469	2.21596
1010497108	0cc1bac0e9fa539c21b506cb35bb0459	SCC	0	0	no	92.5714	0	no	male	62	60	158	24.0346	1	1	0	ICI+chemotherapy	Tislelizumab	PD-1	1	0	0	1	0	0	0	1	0	0	0	0	0	0	0	0	0	0	0	0	186	124	6.55	0.5	0.98	0.149618	4.87	0.743511	189.796	4.96939
1010504335	09e117d81e6cfb39e2ec270c60a1c43d	adenocarcinoma	1	1	Arrhythmia	9	1	T-wave Abnormality	male	65	63	170	21.7993	1	0	0	ICI+chemotherapy	Tislelizumab	PD-1	1	0	1	0	0	0	0	0	0	0	0	0	0	0	0	0	0	0	0	0	241	123	5.97	0.78	1.85	0.309883	3.16	0.529313	130.27	1.70811
1010506553	3413e1b271496f054c55b66fd064746f	adenocarcinoma	0	0	no	159.571	0	no	male	75	60	178	18.937	1	0	0	ICI	Pembrolizumab	PD-1	0	0	0	0	0	0	0	0	0	0	0	0	0	0	0	0	0	0	0	0	260	101	7.33	0.6	1.42	0.193724	5.09	0.694407	183.099	3.58451
1010514440	eb9a3d1029c4731e9c88d5c3ddc78ea6	adenocarcinoma	0	0	no	131.714	0	no	male	62	59	165	21.6713	0	1	0	ICI+chemotherapy	Camilizumab	PD-1	1	1	0	0	0	0	0	1	0	0	0	0	0	0	0	0	0	0	0	0	232	126	8.51	0.64	2.78	0.326675	4.71	0.553467	83.4532	1.69424
1010525437	0dbc2f84ff9075fd787d92773cd1d70d	adenocarcinoma	0	0	no	88.7143	0	no	male	67	69	177	22.0243	0	0	0	ICI+chemotherapy+antiangiogenic_therapy	Durvalumab	PD-L1	1	1	0	0	0	0	1	0	0	0	0	0	0	1	1	0	0	0	0	0	146	140	6.62	0.41	1.09	0.164653	5.07	0.765861	133.945	4.65138
1010531433	dd732a48b6b2f205e16c497fe50024c5	adenocarcinoma	0	0	no	122.143	0	no	female	71	45	154	18.9745	0	0	0	ICI	Durvalumab	PD-L1	0	0	0	0	0	0	0	0	0	0	0	0	0	0	0	0	0	0	1	0	308	122	5.58	0.55	1.02	0.182796	3.85	0.689964	301.961	3.77451
1010538008	d22f9682a789d27afe501ebde4ca9fcc	adenocarcinoma	0	0	no	101.286	0	no	female	47	43	148	19.5398	0	1	0	ICI	Sintilimab	PD-1	0	0	0	0	0	0	0	0	0	0	0	0	0	0	0	0	0	0	0	0	474	124	6.35	0.37	1.91	0.300787	3.98	0.626772	248.168	2.08377
1010539574	66e1381a4ca64bb58f2940c5e41201d7	SCC	0	0	no	125.857	0	no	male	57	65	163	24.4646	1	1	0	ICI+chemotherapy	Pembrolizumab	PD-1	1	0	1	0	1	1	1	1	0	0	0	0	0	0	0	0	0	1	1	0	278	136	10.07	0.63	1.37	0.136048	7.88	0.782522	202.92	5.75182
1010547006	8f3c4aca8188925770098b89b8d6be0e	SCC	0	0	no	136.714	0	no	male	62	61	160	23.8281	0	0	0	ICI+chemotherapy	Camilizumab	PD-1	1	0	1	0	0	0	0	1	0	0	0	0	0	0	0	0	0	0	0	0	403	133	5.85	0.55	1.51	0.25812	3.69	0.630769	266.887	2.44371
1010548405	bbad46394b973985f75eb79be1175888	adenocarcinoma	0	0	no	143.571	0	no	male	77	60	172	20.2812	1	0	0	ICI	Pembrolizumab	PD-1	0	0	0	0	0	0	0	0	0	0	0	0	0	0	0	0	0	0	0	0	82	130	9.39	0.69	1.65	0.175719	6.98	0.743344	49.697	4.2303
1010550722	7e8112d7aa88708d93945009ffba7914	adenocarcinoma	0	0	no	121.714	0	no	male	68	60	165	22.0386	1	1	0	ICI+chemotherapy+antiangiogenic_therapy	Sintilimab	PD-1	1	1	0	0	0	0	0	0	0	0	0	0	0	1	0	0	1	0	0	0	92	109	4.48	0.52	1.58	0.352679	2.28	0.508929	58.2278	1.44304
1010554476	0b30a4fb89a11991b23218bcc6394db0	adenocarcinoma	0	0	no	136.571	0	no	male	72	83	170	28.7197	1	1	0	ICI+chemotherapy+antiangiogenic_therapy	Pembrolizumab	PD-1	1	1	0	0	0	0	0	0	0	0	0	0	0	1	1	1	0	0	0	0	370	100	16.13	0.83	1.46	0.0905146	13.82	0.856789	253.425	9.46575
1010554733	e4e8c38b640d184837e9a0f98c1be1f2	NSCLC	0	0	no	144	0	no	male	66	61	178	19.2526	1	0	0	ICI+chemotherapy	Camilizumab	PD-1	1	0	1	0	0	0	1	0	0	0	0	0	0	0	0	0	0	0	1	0	369	124	5.08	0.42	1.09	0.214567	3.31	0.651575	338.532	3.0367
1010563201	df3d8b937b27f45481b315f4567875b0	SCLC	1	1	Myocarditis	20	0	no	male	58	55	171	18.8092	1	1	0	ICI+chemotherapy	Durvalumab	PD-L1	1	0	0	0	1	1	1	0	1	0	0	0	0	0	0	0	0	0	0	0	238	130	8.69	0.39	0.93	0.10702	7.36	0.846951	255.914	7.91398
1010564076	9f6dbd825c2404377607932ecd2b51fe	LCC	0	0	no	129.571	0	no	male	59	52	165	19.1001	0	0	0	ICI+chemotherapy	Camilizumab	PD-1	1	1	0	0	0	0	0	1	0	0	0	0	0	0	0	0	0	0	0	0	321	116	7.29	0.59	2.31	0.316872	4.26	0.584362	138.961	1.84416
1010567105	b917d1309bf69f22b8b83c134f9e44f4	adenocarcinoma	0	0	no	146.857	0	no	male	60	65	160	25.3906	1	0	0	ICI+chemotherapy	Tislelizumab	PD-1	1	1	0	0	0	0	0	1	1	0	0	0	0	0	0	0	0	0	0	0	265	104	5.8	0.45	0.83	0.143103	4.48	0.772414	319.277	5.39759
1010568017	aa03dcb05dddec623ff6d0e7792efa2c	SCC	1	1	Arrhythmia	6	1	Left Anterior Fascicular Block (LAFB) with T-wave Changes	male	68	70	170	24.2215	1	0	0	ICI+chemotherapy+antiangiogenic_therapy	Sintilimab	PD-1	1	0	0	1	0	0	1	1	0	0	0	0	0	1	0	0	1	0	0	0	264	155	7.76	0.55	1.96	0.252577	4.82	0.621134	134.694	2.45918
1010572444	badae643adaea3109f7b02d554e18df7	SCC	0	0	no	136.714	0	no	male	71	61	169	21.2177	0	0	0	ICI+chemotherapy+antiangiogenic_therapy	Pembrolizumab	PD-1	1	0	0	0	0	0	1	0	0	0	0	0	0	1	0	0	1	0	0	1	380	102	10.34	0.42	0.82	0.0793037	8.89	0.859768	463.415	10.8415
1010573842	082dccb275adc16296ca07ca1497bf2a	adenocarcinoma	0	0	no	134.714	0	no	male	56	63	178	19.8839	0	0	0	ICI+chemotherapy+antiangiogenic_therapy	Sintilimab	PD-1	1	1	1	0	0	0	0	1	0	0	0	0	0	1	1	0	0	0	0	0	469	91	18.8	0.74	2.95	0.156915	15.11	0.803723	158.983	5.12203
1010579216	1823db719a2232b910877cc08ee7a69f	adenocarcinoma	0	0	no	146.429	0	no	male	56	82	179	25.5922	1	1	0	ICI+chemotherapy	Camilizumab	PD-1	1	0	0	1	0	0	0	1	0	0	0	0	0	0	0	0	0	0	0	0	451	147	9.4	0.94	2.67	0.284043	5.31	0.564894	168.914	1.98876
1010580366	f8e43d016232093d1daa7c711fe8517d	SCC	0	0	no	140.429	0	no	male	67	63	171	21.5451	1	0	0	ICI+chemotherapy	Tislelizumab	PD-1	1	0	1	0	0	0	0	1	0	0	0	0	0	0	0	0	0	0	0	0	176	139	4.88	0.45	1.55	0.317623	2.66	0.545082	113.548	1.71613
1010580547	d80f018ccf6bcc67ec63a563bd005dd6	SCC	0	0	no	120.857	0	no	male	70	71	172	23.9995	1	1	1	ICI+chemotherapy	Pembrolizumab	PD-1	1	0	0	0	0	0	0	0	1	0	0	0	0	0	0	0	0	0	0	0	223	96	4.31	0.64	0.66	0.153132	2.84	0.658933	337.879	4.30303
1010581462	ec1cb460842f5d6dd6e837b895d48cb3	adenocarcinoma	0	0	no	138.286	0	no	male	62	71	175	23.1837	1	0	0	ICI+chemotherapy	Tislelizumab	PD-1	1	0	0	1	0	0	0	1	0	0	0	0	0	0	0	0	0	0	0	0	229	136	4.27	0.4	1.6	0.374707	2.19	0.512881	143.125	1.36875
1010582631	38e6b4a8edd5ada2adf70b46b1600ad0	adenocarcinoma	1	1	Arrhythmia	3.5	1	Atrial Premature Beat (APB)	male	61	62	160	24.2188	1	1	0	ICI+chemotherapy+antiangiogenic_therapy	Tislelizumab	PD-1	1	0	1	0	0	0	1	1	0	0	0	0	0	1	0	0	1	0	0	0	159	123	3.81	0.29	1.39	0.364829	1.87	0.490814	114.388	1.34532
1010589573	00dfdceb9819477629f9558cb8a95fba	adenocarcinoma	0	0	no	141.857	0	no	male	57	92	168	32.5964	1	0	0	ICI+chemotherapy	Camilizumab	PD-1	1	0	0	0	1	0	0	1	0	0	0	0	0	0	0	0	0	0	1	0	207	126	12.13	0.98	2.5	0.206101	8.53	0.703215	82.8	3.412
1010594861	84ea3b63f304014c034e2da3710125e2	NET	0	0	no	135.143	0	no	male	75	58	163	21.83	0	0	0	ICI+chemotherapy	Sintilimab	PD-1	1	0	0	0	0	1	0	1	0	0	0	0	0	0	0	0	0	0	0	0	269	103	3.73	0.36	0.94	0.252011	2.36	0.632708	286.17	2.51064
1010601194	c0cdf0fc1ccf1c73c5291139d58649dd	SCC	0	0	no	135.857	0	no	female	59	67	169	23.4586	0	0	0	ICI	Pembrolizumab	PD-1	0	0	0	0	0	0	0	0	0	0	0	0	0	0	0	0	0	0	0	0	279	120	5.95	0.46	1.3	0.218487	3.68	0.618487	214.615	2.83077
1010604870	159aef871cbffd65313fe27a367e83ee	SCC	0	0	no	147.714	0	no	male	48	67	169	23.4586	1	0	0	ICI+chemotherapy	Tislelizumab	PD-1	1	0	0	0	1	1	1	1	0	0	0	0	0	0	0	0	0	0	0	0	185	95	19.84	0.85	2.17	0.109375	16.77	0.845262	85.2535	7.72811
1010607546	07ac6bd77087a273239568cd4999d636	SCC	0	0	no	142.429	0	no	male	68	65	170	22.4913	1	0	0	ICI	Pembrolizumab	PD-1	0	0	0	0	0	0	0	0	0	0	0	0	0	0	0	0	0	0	1	0	106	123	4.02	0.72	1.54	0.383085	1.76	0.437811	68.8312	1.14286
1010613632	458f419ae461ae0af3febc0a1c675ab6	SCC	0	0	no	141.286	0	no	male	64	49	171	16.7573	0	0	0	ICI+chemotherapy	Nivolumab	PD-1	1	0	1	0	0	0	0	0	1	0	0	0	0	0	0	0	0	0	0	0	201	137	5.06	0.44	1.23	0.243083	3.32	0.656126	163.415	2.69919
1010615660	ce185a3c9c2db5ce7eeb49e6fb32f4e7	SCC	1	1	Arrhythmia	7	1	Left Anterior Fascicular Block (LAFB)	male	67	67	164	24.9108	1	0	0	ICI+chemotherapy	Sintilimab	PD-1	1	0	1	0	0	0	0	1	0	0	0	0	0	0	0	0	0	0	0	0	165	137	3.86	0.4	1	0.259067	2.33	0.603627	165	2.33
1010634040	ab2782fc5ae000b1e7a465fc046b116d	SCC	0	0	no	92.2857	0	no	male	68	75	175	24.4898	1	0	0	ICI+antiangiogenic_therapy	Pembrolizumab	PD-1	0	0	0	0	0	0	0	0	0	0	0	0	0	1	0	1	0	0	0	0	267	104	4.83	0.67	1.16	0.240166	2.82	0.583851	230.172	2.43103
1010634902	c241a3b0430324314f8ea7e1e878f73b	SCC	0	0	no	54.2857	0	no	male	76	62	178	19.5682	1	0	0	ICI	Nivolumab	PD-1	0	0	0	0	0	0	0	0	0	0	0	0	0	0	0	0	0	0	0	0	345	125	5.96	0.67	1.77	0.29698	3.05	0.511745	194.915	1.72316
1010637734	f1ae555f68805ebec754d926e8a78006	adenocarcinoma	0	0	no	144.429	0	no	male	57	69	165	25.3444	1	0	0	ICI	Durvalumab	PD-L1	0	0	0	0	0	0	0	0	0	0	0	0	0	0	0	0	0	0	0	0	262	133	7.01	0.57	1.6	0.228245	4.62	0.659058	163.75	2.8875
1010641834	353827be24006c6b41fd7ec73a1875fe	adenocarcinoma	0	0	no	152.714	0	no	male	61	63	172	21.1263	1	1	0	ICI+chemotherapy+antiangiogenic_therapy	Camilizumab	PD-1	1	1	0	0	0	0	0	1	0	0	0	0	0	1	0	0	1	0	0	0	249	139	7.32	0.6	1.21	0.165301	5.02	0.685792	205.785	4.14876
1010642150	8bc487ca2128f88625fe7cd9f0a0f799	SCC	0	0	no	140	0	no	female	57	54	163	20.3244	0	0	0	ICI+chemotherapy	Durvalumab	PD-L1	1	0	0	0	1	1	1	0	0	0	0	0	0	0	0	0	0	0	0	0	244	127	4.14	0.38	1.34	0.323671	2.3	0.555556	182.09	1.71642
1010644311	776798fc2c97aca3a1a082ce5cabaf98	SCC	0	0	no	128.429	0	no	male	52	78	170	26.9896	1	1	0	ICI	Durvalumab	PD-L1	0	0	0	0	0	0	0	0	0	0	0	0	0	0	0	0	0	0	0	0	164	106	3.86	0.48	1.61	0.417098	1.73	0.448187	101.863	1.07453
1010644948	9a48523ba3f20218b3d182e99eb6c8b5	adenocarcinoma	0	0	no	86.4286	0	no	male	53	56	166	20.1408	0	0	0	ICI+chemotherapy+antiangiogenic_therapy	Pembrolizumab	PD-1	1	1	1	0	0	0	0	1	1	0	0	0	0	1	1	0	0	0	0	0	189	159	6.37	0.54	1.4	0.21978	4.3	0.675039	135	3.07143
1010650831	177b83d70b6a16f834ea1fef8b71b4cd	NSCLC	0	0	no	149.857	0	no	male	51	60	166	21.7738	0	0	0	ICI	Pembrolizumab	PD-1	0	0	0	0	0	0	0	0	0	0	0	0	0	0	0	0	0	0	0	0	590	77	14.48	1.1	1.57	0.108425	11.7	0.808011	375.796	7.45223
1010653189	27512d1ff7968b2ebb7a051793e669f5	SCC	0	0	no	86.8571	0	no	male	73	84	173	28.0664	1	1	0	ICI+chemotherapy	Pembrolizumab	PD-1	1	0	1	0	0	0	0	0	0	0	0	0	0	0	0	0	0	0	0	0	140	37	4.17	0.41	1.34	0.321343	2.3	0.551559	104.478	1.71642
1010655989	ce690e0d33893bb07bf9e19f08b4070d	adenocarcinoma	0	0	no	57.5714	0	no	male	57	80	174	26.4236	0	0	0	ICI	Pembrolizumab	PD-1	0	0	0	0	0	0	0	0	0	0	0	0	0	0	0	0	0	1	1	0	167	153	5.77	0.5	1.22	0.211438	3.61	0.62565	136.885	2.95902
1010666996	132f2e7bac2979301e9fb4a1b99b2369	adenocarcinoma	0	0	no	56.1429	0	no	female	43	65	174	21.4692	0	0	0	ICI+antiangiogenic_therapy	Pembrolizumab	PD-1	0	0	0	0	0	0	0	0	0	0	0	0	0	1	1	0	0	0	0	0	253	131	3.74	0.28	1.02	0.272727	2.35	0.628342	248.039	2.30392
1010670889	c504fa19f13686874ef917b8df7f9e0e	SCC	0	0	no	147	0	no	male	59	62	168	21.9671	1	0	1	ICI+chemotherapy	Durvalumab	PD-L1	1	0	0	0	1	0	1	0	0	0	0	0	0	0	0	0	0	0	0	0	467	113	11.22	1.64	1.36	0.121212	8	0.713012	343.382	5.88235
1010678928	674453a9ee60f92e2f5b7057121db65a	SCC	0	0	no	153.857	0	no	male	70	65	170	22.4913	1	1	0	ICI+chemotherapy	Atezolizumab	PD-L1	1	0	0	0	0	1	0	1	0	0	0	0	0	0	0	0	0	0	0	0	139	126	4.62	0.59	1.12	0.242424	2.79	0.603896	124.107	2.49107
1010682407	f500620847d1a1dee0da4c0577b5535c	SCC	0	0	no	113.714	0	no	male	72	67	177	21.3859	1	0	0	ICI+chemotherapy+antiangiogenic_therapy	Durvalumab	PD-L1	1	0	1	0	0	0	0	1	0	0	0	0	0	1	0	1	0	0	0	0	210	128	4.52	0.5	1.11	0.245575	2.68	0.59292	189.189	2.41441
1010685373	0b0728053d2a9914f7ff6eb6c2eaafa0	adenocarcinoma	0	0	no	75.5714	0	no	male	75	70	171	23.939	1	1	0	ICI+chemotherapy	Tislelizumab	PD-1	1	1	0	0	0	0	0	1	0	0	0	0	0	0	0	0	0	0	0	0	224	139	5.68	0.37	0.84	0.147887	4.38	0.771127	266.667	5.21429
1010701823	a0849dd05f2fbf4da12e94945a077bdb	adenocarcinoma	0	0	no	138.429	0	no	male	69	61	175	19.7551	1	0	0	ICI+chemotherapy	Camilizumab	PD-1	1	1	0	0	0	0	0	0	1	0	0	0	0	0	0	0	0	0	0	0	188	111	4.59	0.37	1.03	0.224401	2.44	0.53159	182.524	2.36893
1010702038	d1b8fbca649785012e0cf9e710705668	SCC	0	0	no	143.714	0	no	male	57	72	163	27.0993	1	1	0	ICI+chemotherapy+antiangiogenic_therapy	Pembrolizumab	PD-1	1	0	1	0	0	0	0	0	1	0	0	0	0	1	0	0	1	1	0	0	263	129	12.38	1.51	2.47	0.199515	8.71	0.703554	106.478	3.52632
1010702373	98d53c51d49458425fb5de3281241379	SCC	0	0	no	135.286	0	no	male	71	67	172	22.6474	1	0	0	ICI+chemotherapy+antiangiogenic_therapy	Tislelizumab	PD-1	1	0	1	1	0	0	0	0	0	0	0	0	0	1	0	1	1	0	0	0	195	152	9.22	0.63	1.22	0.132321	7.31	0.792842	159.836	5.9918
1010707330	63dd923a0abc920664d50377352fdbe0	SCC	0	0	no	136.857	0	no	male	66	70	167	25.0995	1	1	0	ICI+chemotherapy	Camilizumab	PD-1	1	1	0	0	0	0	0	1	0	0	0	0	0	0	0	0	0	0	0	0	222	95	9.48	0.93	0.85	0.0896624	7.55	0.796414	261.176	8.88235
1010710135	407f81762e7f8beabbcf5dd510210209	SCC	0	0	no	145.429	0	no	female	60	54	159	21.2808	0	0	0	ICI+chemotherapy	Tislelizumab	PD-1	1	0	1	0	0	0	1	1	0	0	0	0	0	0	0	0	0	0	0	0	187	92	5.98	0.2	1.03	0.172241	4.63	0.774247	181.553	4.49515
1010710665	1d39791e55c41dba74051728d63f8b82	adenocarcinoma	0	0	no	144.429	0	no	male	76	56	163	21.0772	1	1	0	ICI+chemotherapy	Pembrolizumab	PD-1	1	0	1	0	0	0	0	0	1	0	0	0	0	0	0	0	0	1	1	0	184	139	10.36	0.24	0.45	0.0434363	9.66	0.932432	408.889	21.4667
1010711371	75506f9b4526c13beea10ceaefbeaf76	adenocarcinoma	0	0	no	141.857	0	no	male	67	67	175	21.8776	1	0	0	ICI+antiangiogenic_therapy	Tislelizumab	PD-1	0	0	0	0	0	0	0	0	0	0	0	0	0	1	1	1	0	0	0	0	54	88	6.09	0.94	0.69	0.1133	4.31	0.707718	78.2609	6.24638
1010722922	7755982345a7a86f9a59e52296e3d58e	adenocarcinoma	0	0	no	53.7143	0	no	male	55	65	168	23.03	1	0	0	ICI+chemotherapy+antiangiogenic_therapy	Sintilimab	PD-1	1	0	0	1	0	0	0	0	0	0	0	0	0	1	1	0	0	0	0	0	329	131	6.7	0.53	0.91	0.135821	5.22	0.779104	361.538	5.73626
1010725283	c080bdb787b37b3ea2f8c4ca9dcefb51	adenocarcinoma	0	0	no	145.857	0	no	male	52	63	171	21.5451	1	1	1	ICI+chemotherapy+antiangiogenic_therapy	Pembrolizumab	PD-1	1	1	1	0	0	0	1	0	0	0	0	0	0	1	1	1	0	0	0	0	224	156	3.93	0.9	1.2	0.305344	1.66	0.422392	186.667	1.38333
1010734902	e6852af909756b8536311fcd9d97ae28	SCC	0	0	no	145.857	0	no	male	75	57	173	19.0451	1	0	0	ICI	Camilizumab	PD-1	0	0	0	0	0	0	0	0	0	0	0	0	0	0	0	0	0	0	0	0	289	135	22.62	1.39	1.09	0.0481874	17.86	0.789567	265.138	16.3853
1010737477	bce58858509ace0f411732b00e1f24c9	SCC	0	0	no	148.429	0	no	male	75	54	171	18.4672	0	0	0	ICI+chemotherapy	Pembrolizumab	PD-1	1	0	1	0	0	0	0	1	0	0	0	0	0	0	0	0	0	0	0	0	213	127	7.39	1.05	1.6	0.216509	4.53	0.612991	133.125	2.83125
1010737569	ffdf42a76bc9f49c51ffe81ba566c7d5	SCC	0	0	no	145.286	0	no	female	59	50	165	18.3655	0	0	0	ICI+chemotherapy+antiangiogenic_therapy	Sintilimab	PD-1	1	1	0	0	0	0	0	1	0	0	0	0	0	1	0	0	1	0	0	0	321	93	2.76	0.05	0.76	0.275362	1.96	0.710145	422.368	2.57895
1010739202	0f46aa45611459ce8f10e6ddf3ea4045	SCC	0	0	no	132.571	0	no	male	59	76	171	25.9909	0	0	0	ICI+chemotherapy	Pembrolizumab	PD-1	1	0	1	0	0	0	0	1	0	0	0	0	0	0	0	0	0	0	0	0	398	149	7.45	0.63	1.7	0.228188	4.94	0.663087	234.118	2.90588
1010741453	0fe1076427cc2580d826a240a1ac92f6	SCC	0	0	no	130.857	0	no	male	29	78	173	26.0617	0	0	0	ICI+chemotherapy	Pembrolizumab	PD-1	1	0	1	1	0	0	1	1	0	0	0	0	0	0	0	0	0	0	0	0	226	101	11.31	1.83	2.37	0.209549	7.01	0.619805	95.3586	2.95781
1010742312	c2efeedf76d75c108872aed6dd843357	SCC	0	0	no	148.714	0	no	male	36	86	171	29.4108	0	0	0	ICI+chemotherapy	Pembrolizumab	PD-1	1	0	1	0	0	0	1	0	0	0	0	0	0	0	0	0	0	0	0	0	245	134	6.95	0.72	1.1	0.158273	4.52	0.65036	222.727	4.10909
1010747020	80adc16b88ffe0694f46ac34f2f64df9	SCC	0	0	no	156.857	0	no	male	65	63	171	21.5451	1	0	0	ICI+chemotherapy	Pembrolizumab	PD-1	1	0	1	0	0	0	0	1	0	0	0	0	0	0	0	0	0	0	0	0	353	111	9.34	0.99	2.13	0.228051	6.06	0.648822	165.728	2.84507
1010747799	2365239f9abdce269df10db27b63e70c	adenocarcinoma	0	0	no	147.714	0	no	male	73	55	165	20.202	1	1	0	ICI+chemotherapy+antiangiogenic_therapy	Pembrolizumab	PD-1	1	1	0	0	0	0	1	1	0	0	0	0	0	1	0	0	1	0	1	0	352	144	7.81	0.67	1.35	0.172855	5.68	0.727273	260.741	4.20741
1010754239	64b77d163c1a39b703eb7c2cbabfabe9	adenocarcinoma	0	0	no	112.429	0	no	male	62	56	170	19.3772	1	1	0	ICI+antiangiogenic_therapy	Sintilimab	PD-1	0	0	0	0	0	0	0	0	0	0	0	0	0	1	0	1	0	0	0	0	166	86	8.73	0.5	0.5	0.0572738	7.65	0.876289	332	15.3
1010757455	3414429768184c659a6e1c219d2ccb77	adenocarcinoma	0	0	no	113.857	0	no	male	65	55	157	22.3133	1	0	0	ICI+chemotherapy+antiangiogenic_therapy	Tislelizumab	PD-1	1	0	1	0	0	0	1	1	0	0	0	0	0	1	1	0	1	0	0	0	307	140	6.86	0.7	1.28	0.186589	4.64	0.676385	239.844	3.625
1010759082	e1dcf81834f06e4657e1b94711a69c57	adenocarcinoma	0	0	no	149.857	0	no	male	67	55	170	19.0311	0	0	0	ICI+chemotherapy	Camilizumab	PD-1	1	1	0	0	0	0	1	0	0	0	0	0	0	0	0	0	0	0	0	0	188	131	8.19	0.57	2.01	0.245421	5.46	0.666667	93.5323	2.71642
1010760676	dd222164e7fb9538f903348a551360cd	SCC	0	0	no	116.714	0	no	male	72	68	170	23.5294	1	1	0	ICI+chemotherapy	Pembrolizumab	PD-1	1	0	1	1	0	0	0	1	0	0	0	0	0	0	0	0	0	0	1	0	228	133	5.53	0.58	1.37	0.24774	3.23	0.584087	166.423	2.35766
1010765820	31ae9f77e09b0658cd3bdce5f28f8c3b	adenocarcinoma	0	0	no	151.429	0	no	male	64	69	175	22.5306	1	0	0	ICI+chemotherapy+antiangiogenic_therapy	Atezolizumab	PD-L1	1	0	1	0	1	1	1	0	0	0	0	0	0	1	0	1	0	0	0	0	180	122	8.1	0.7	2.09	0.258025	5.18	0.639506	86.1244	2.47847
1010768733	394439c69781564e367d67e909b43569	adenocarcinoma	0	0	no	153.286	0	no	male	68	95	170	32.872	1	0	0	ICI+chemotherapy	Durvalumab	PD-L1	1	0	0	0	1	1	0	1	0	0	0	0	0	0	0	0	0	0	0	0	189	132	4.2	0.43	1.12	0.266667	2.56	0.609524	168.75	2.28571
1010768801	59153585d9cf4e32f2a9eed191048141	adenocarcinoma	0	0	no	84	0	no	male	56	60	160	23.4375	1	0	0	ICI+chemotherapy+antiangiogenic_therapy	Tislelizumab	PD-1	1	0	1	1	0	0	0	1	1	0	0	0	0	1	0	0	1	0	0	0	295	116	4.96	0.45	0.95	0.191532	3.38	0.681452	310.526	3.55789
1010769621	3253f3a506c8043020e193f605e30294	adenocarcinoma	0	0	no	150.571	0	no	male	64	69	171	23.597	1	0	0	ICI+chemotherapy	Pembrolizumab	PD-1	1	0	1	1	0	0	0	1	1	0	0	0	0	0	0	0	0	0	0	0	239	130	8.25	0.68	1.88	0.227879	5.41	0.655758	127.128	2.87766
1010771370	c77da41b0d2cce1c82f2e3dc26d93f87	adenocarcinoma	0	0	no	116.571	0	no	male	70	74	171	25.2727	1	1	0	ICI+antiangiogenic_therapy	Pembrolizumab	PD-1	0	0	0	0	0	0	0	0	0	0	0	0	0	1	1	0	0	1	1	1	268	143	5.35	0.74	2.13	0.398131	2.34	0.437383	125.822	1.09859
1010780149	3d43fe95c46b290d6b217d07ceff1ac3	adenocarcinoma	0	0	no	143.571	0	no	male	75	70	172	23.6614	1	0	0	ICI+chemotherapy	Tislelizumab	PD-1	1	1	0	0	0	0	0	1	0	0	0	0	0	0	0	0	0	0	0	0	367	130	15.28	1.22	3.84	0.251309	9.66	0.632199	95.5729	2.51562
1010784520	999e1095bde78d7128d243a0c5249047	adenocarcinoma	1	1	Arrhythmia	3	1	First-Degree Atrioventricular Block (First-Degree AV Block)	male	75	70	169	24.5089	1	0	1	ICI+chemotherapy+antiangiogenic_therapy	Tislelizumab	PD-1	1	1	1	0	0	0	0	1	0	0	0	0	0	1	0	1	0	0	1	0	356	151	9.67	0.81	1.44	0.148914	6.46	0.668046	247.222	4.48611
1010784764	c2cb1bcdb55777ce9fd4e995721376cb	SCC	0	0	no	138.714	0	no	male	67	52	164	19.3337	1	1	0	ICI+antiangiogenic_therapy	Pembrolizumab	PD-1	0	0	0	0	0	0	0	0	0	0	0	0	0	1	0	1	0	0	1	0	311	91	8.43	0.7	1.25	0.14828	6.32	0.749703	248.8	5.056
1010787302	09c29538363db0634fdd3161ff449a9f	SCC	1	1	Arrhythmia	5	1	ST-Segment Change	male	64	75	163	28.2284	1	0	0	ICI+chemotherapy	Durvalumab	PD-L1	1	0	0	0	0	1	0	1	0	0	0	0	0	0	0	0	0	0	1	0	175	134	4.16	0.38	1.75	0.420673	1.9	0.456731	100	1.08571
1010792092	27401f6ff2ba5222ea5c699d59995ac2	adenocarcinoma	0	0	no	138.143	0	no	female	62	68	166	24.677	0	0	0	ICI+chemotherapy+antiangiogenic_therapy	Camilizumab	PD-1	1	1	0	0	0	0	1	0	0	0	0	0	0	1	0	0	1	0	1	0	559	134	8.65	0.56	1.23	0.142197	6.7	0.774566	454.472	5.44715
1010793521	253e73fb7338aa997ce50e005cd2c280	adenocarcinoma	0	0	no	150	0	no	female	61	66	170	22.8374	0	0	0	ICI+chemotherapy	Tislelizumab	PD-1	1	1	1	0	0	0	1	0	0	0	0	0	0	0	0	0	0	1	0	0	250	141	9.41	0.97	2.19	0.232731	5.94	0.631243	114.155	2.71233
1010797562	cc3230e49ab77fd4348e6c9fd9959a41	SCC	0	0	no	147.143	0	no	male	55	75	165	27.5482	0	0	0	ICI+chemotherapy+antiangiogenic_therapy	Durvalumab	PD-L1	1	0	0	0	1	1	0	1	0	0	0	0	0	1	0	1	0	0	0	0	276	146	8.45	0.61	1.28	0.151479	6.45	0.763314	215.625	5.03906
1010797668	3a47e7bcc3d6457dab6c6de66855949d	SCC	0	0	no	147.571	0	no	male	75	82	177	26.1738	1	1	0	ICI+chemotherapy	Pembrolizumab	PD-1	1	0	1	0	0	0	0	1	0	0	0	0	0	0	0	0	0	0	0	0	85	107	5.1	0.31	1.4	0.27451	3.36	0.658824	60.7143	2.4
1010800607	6308f11ca4617155170ab28e4b435974	SCLC	0	0	no	153.143	0	no	male	60	74	170	25.6055	1	1	0	ICI	Durvalumab	PD-L1	0	0	0	0	0	0	0	0	0	0	0	0	0	0	0	0	0	0	0	0	187	100	5.41	0.44	0.87	0.160813	4	0.739372	214.943	4.5977
1010801298	fa008a23ffb6b1001dbba7ed50a34627	SCLC	0	0	no	120.857	0	no	male	74	70	166	25.4028	1	0	0	ICI+chemotherapy	Sintilimab	PD-1	1	0	0	0	0	0	0	1	0	0	0	0	0	0	0	0	0	0	0	1	219	163	7.15	0.82	1.24	0.173427	4.85	0.678322	176.613	3.91129
1010810052	8970466bb0de6609baa942628c0adc5b	adenocarcinoma	0	0	no	147.571	0	no	female	79	35	140	17.8571	0	0	0	ICI+chemotherapy+antiangiogenic_therapy	Camilizumab	PD-1	1	0	0	0	0	0	1	0	0	0	0	0	0	1	0	0	1	0	0	0	310	168	10.06	0.65	3.75	0.372763	5.58	0.554672	82.6667	1.488
1010818041	ea8eb78bbd50bff507f785f98c21f17d	sarcomatoid carcinoma	0	0	no	151.429	0	no	male	73	41	160	16.0156	1	0	1	ICI	Pembrolizumab	PD-1	0	0	0	0	0	0	0	0	0	0	0	0	0	0	0	0	0	0	1	0	242	115	10.53	0.57	1.49	0.1415	8.38	0.795821	162.416	5.62416
1010818204	30609cfcd5178cb9afe52d88147704ae	SCLC	0	0	no	130.714	0	no	male	71	70	168	24.8016	0	0	0	ICI+antiangiogenic_therapy	Atezolizumab	PD-L1	0	0	0	0	0	0	0	0	0	0	0	0	0	1	0	1	0	1	1	0	135	98	4.09	0.35	0.55	0.134474	3.13	0.765281	245.455	5.69091
1010827117	dc55f7860cc383bbf10c000a6b575eba	SCLC	0	0	no	153.857	0	no	male	69	67	169	23.4586	1	1	0	ICI+chemotherapy	Tislelizumab	PD-1	1	0	0	0	1	0	1	0	0	0	0	0	0	0	0	0	0	0	0	0	220	148	8.09	0.13	2.18	0.269468	5.63	0.695921	100.917	2.58257
1010836533	4a00e21d52b6eb1396ed92d540fee1da	adenocarcinoma	0	0	no	154.429	0	no	male	55	49	165	17.9982	1	0	1	ICI+chemotherapy	Durvalumab	PD-L1	1	0	1	0	1	1	1	1	0	0	0	0	0	0	0	0	0	0	0	0	280	112	6.92	0.59	0.66	0.0953757	5.58	0.806358	424.242	8.45455
1010836585	781ee676b80eaae8a29b46e08ce2721c	SCC	0	0	no	150.286	0	no	male	73	64	173	21.3839	1	0	1	ICI+chemotherapy	Tislelizumab	PD-1	1	0	1	0	0	0	0	0	1	0	0	0	0	0	0	0	0	0	0	0	267	112	4.31	0.19	1.42	0.329466	2.68	0.62181	188.028	1.88732
1010836626	bb1f0e41ced15037e1c1796a13f19f15	adenocarcinoma	0	0	no	149.143	0	no	male	72	64	155	26.6389	1	0	0	ICI+chemotherapy	Camilizumab	PD-1	1	0	0	0	0	0	1	0	0	0	0	0	0	0	0	0	0	0	0	0	445	115	7.21	0.6	1.34	0.185853	5.1	0.707351	332.09	3.80597
1010837389	769d878046537a0aea743bfb49647a13	SCC	0	0	no	141.857	0	no	male	64	56	160	21.875	1	1	0	ICI+chemotherapy+antiangiogenic_therapy	Pembrolizumab	PD-1	1	0	1	0	0	0	0	1	0	0	0	0	0	1	0	1	0	0	0	0	191	97	4.44	0.46	0.55	0.123874	3.13	0.704955	347.273	5.69091
1010854714	60c1e3000ec453ac0dadb381774e2b1d	adenocarcinoma	0	0	no	40	0	no	male	42	65	177	20.7476	0	0	0	ICI+chemotherapy+antiangiogenic_therapy	Atezolizumab	PD-L1	1	1	0	0	0	0	0	0	1	0	0	0	0	1	1	0	0	0	0	0	209	134	5.71	0.43	0.89	0.155867	4.34	0.76007	234.831	4.8764
1010857271	bedf9c7df245ea70a32846dd58732041	adenocarcinoma	0	0	no	129.714	0	no	male	57	50	154	21.0828	1	1	0	ICI+chemotherapy+antiangiogenic_therapy	Tislelizumab	PD-1	1	0	1	0	0	0	1	0	0	0	0	0	0	1	0	0	1	0	0	0	627	95	32.46	0.14	0.67	0.0206408	31.61	0.973814	935.821	47.1791
1010859170	629919a317a547506965b7a6dabe8844	SCC	0	0	no	90.4286	0	no	male	62	60	173	20.0474	1	1	0	ICI+chemotherapy	Durvalumab	PD-L1	1	0	0	1	0	0	0	0	0	0	0	0	0	0	0	0	0	0	0	0	187	88	5.77	0.54	1.27	0.220104	3.39	0.587522	147.244	2.66929
1010861274	ad8f4c04cfc3f4583e2dea834136ce60	SCC	0	0	no	58.8571	0	no	male	60	79	177	25.2163	1	0	0	ICI+chemotherapy	Atezolizumab	PD-L1	1	0	1	0	0	0	0	0	0	0	0	0	0	0	0	0	0	0	0	0	289	137	4.15	0.51	0.91	0.219277	2.44	0.587952	317.582	2.68132
1010862050	799ebcdc3eed17ab9386dcf15e0e60b1	SCC	0	0	no	140.714	0	no	male	56	73	178	23.04	1	0	0	ICI+chemotherapy	Pembrolizumab	PD-1	1	0	0	1	0	0	0	1	0	0	0	0	0	0	0	0	0	0	0	0	269	136	5.56	0.34	1.55	0.278777	3.51	0.631295	173.548	2.26452
1010864418	ca01153cc4ead567751c3e96488bb237	adenocarcinoma	0	0	no	134.857	0	no	male	58	52	174	17.1753	1	0	0	ICI+chemotherapy	Pembrolizumab	PD-1	1	1	0	0	0	0	0	0	0	0	0	0	0	0	0	0	0	0	0	0	298	124	7.49	0.68	2.85	0.380507	3.84	0.512684	104.561	1.34737
1010865639	4461e0174d9bcc48983f33c1138c69ec	sarcomatoid carcinoma	0	0	no	128.571	0	no	male	65	60	168	21.2585	1	1	0	ICI+chemotherapy	Tislelizumab	PD-1	1	0	0	0	0	0	0	1	0	0	0	0	0	0	0	0	0	0	0	0	319	120	7.01	0.68	1.36	0.194009	4.88	0.696148	234.559	3.58824
1010871890	e885923396d92d45ea003206527c9bed	NET	0	0	no	130.857	0	no	male	74	68	167	24.3824	1	1	0	ICI+chemotherapy	Durvalumab	PD-L1	1	0	0	0	1	0	0	1	0	0	0	0	0	0	0	0	0	0	0	0	233	91	8.97	1.79	0.95	0.105909	6.19	0.690078	245.263	6.51579
1010878877	edfe7837047ecf57c303ad2d94dbfec3	SCLC	0	0	no	81.1429	0	no	male	69	50	160	19.5312	0	0	0	ICI+antiangiogenic_therapy	Pembrolizumab	PD-1	0	0	0	0	0	0	0	0	0	0	0	0	0	1	0	1	0	0	0	0	242	102	3.65	0.42	1.21	0.331507	1.79	0.490411	200	1.47934
1010886293	8061e2b59cbf2a95d0ca66881b77bf8a	SCLC	0	0	no	132	0	no	female	54	56	161	21.6041	0	0	0	ICI+chemotherapy+antiangiogenic_therapy	Pembrolizumab	PD-1	1	1	1	1	1	0	1	0	0	0	0	0	0	1	0	0	1	0	0	0	281	121	7.8	0.52	1.3	0.166667	5.88	0.753846	216.154	4.52308
1010887590	012552cfe385920013073973e4d15e26	SCC	0	0	no	113.429	0	no	male	60	72	163	27.0993	1	0	1	ICI+chemotherapy+antiangiogenic_therapy	Tislelizumab	PD-1	1	1	1	1	0	0	0	0	1	0	0	0	0	1	0	1	0	0	0	0	311	115	6.57	0.94	2.26	0.343988	3	0.456621	137.611	1.32743
1010890864	a5c7a4edd89861be5b9bdb817b22059d	SCC	0	0	no	125.429	0	no	male	66	80	165	29.3848	1	1	0	ICI+chemotherapy+antiangiogenic_therapy	Pembrolizumab	PD-1	1	1	0	0	0	0	0	1	0	0	0	0	0	1	0	1	0	0	0	0	396	125	19.2	0.25	0.47	0.0244792	18.47	0.961979	842.553	39.2979
1010890949	8b801e52afb7ac879afe387ec2157fed	adenocarcinoma	0	0	no	131.571	0	no	male	74	65	173	21.7181	1	1	0	ICI+chemotherapy	Sintilimab	PD-1	1	0	1	0	0	0	0	1	0	0	0	0	0	0	0	0	0	0	1	1	335	142	5.93	0.56	0.8	0.134907	4.37	0.736931	418.75	5.4625
1010893670	0ad299c6f31d08b206f5a475321fc829	adenocarcinoma	0	0	no	120.143	0	no	male	58	70	165	25.7117	0	0	0	ICI+chemotherapy	Sintilimab	PD-1	1	0	0	1	0	0	0	1	0	0	0	0	0	0	0	0	0	0	0	0	266	127	7.37	0.35	1.1	0.149254	5.85	0.793758	241.818	5.31818
1010905892	e61943efa72685c57f5d9b2e20e955ec	adenocarcinoma	0	0	no	109.286	0	no	female	43	56	163	21.0772	0	0	0	ICI+chemotherapy	Camilizumab	PD-1	1	0	1	0	0	0	0	1	0	0	0	0	0	0	0	0	0	1	0	0	323	127	7.55	0.85	1.9	0.251656	4.741	0.627947	170	2.49526
1010909157	99c44146dfc229c1621d3dae34c2f87d	adenocarcinoma	0	0	no	118.857	0	no	male	67	64	176	20.6612	1	0	0	ICI+chemotherapy+antiangiogenic_therapy	Tislelizumab	PD-1	1	0	1	0	0	0	0	1	0	0	0	0	0	1	0	1	0	0	1	0	280	140	14.09	1.1	1.82	0.12917	10.98	0.779276	153.846	6.03297
1010922087	8828af0978a8ec299b83c6432c298a93	SCC	0	0	no	132.857	0	no	male	59	65	165	23.7649	1	1	0	ICI+chemotherapy	Tislelizumab	PD-1	1	0	1	0	0	0	0	1	0	0	0	0	0	0	0	0	0	0	0	0	526	128	19.23	1.2	2.26	0.117525	15.73	0.817993	232.743	6.96018
1010922136	bcb54c93c8a6796ab81fe51b01dc8b6b	adenocarcinoma	0	0	no	128.429	0	no	female	35	55	160	21.4844	0	0	0	ICI+chemotherapy+antiangiogenic_therapy	Camilizumab	PD-1	1	1	0	0	0	0	0	1	0	0	0	0	0	1	1	0	0	0	0	0	282	128	4.85	0.41	1.12	0.230928	3.25	0.670103	251.786	2.90179
1010922194	2bd947c0795862dd16dc8dde4085ac25	SCC	0	0	no	75.7143	0	no	male	57	63	166	22.8625	0	0	0	ICI+chemotherapy+antiangiogenic_therapy	Tislelizumab	PD-1	1	0	1	0	0	0	1	1	0	0	0	0	0	1	1	1	0	0	0	0	71	76	4	0.81	1	0.25	2.15	0.5375	71	2.15
1010930046	6dbd7e2325f612318c6e8b3bad50d3b7	SCC	0	0	no	132.857	0	no	male	68	53	163	19.9481	0	0	0	ICI+chemotherapy+antiangiogenic_therapy	Atezolizumab	PD-L1	1	0	0	0	1	0	0	1	0	0	0	0	0	1	0	1	0	0	0	0	325	117	7.6	0.19	1.29	0.169737	6.1	0.802632	251.938	4.72868
1010932761	279daa0c0a0307481a107ff98c9c6406	adenocarcinoma	0	0	no	135.714	0	no	male	80	54	155	22.4766	1	0	0	ICI	Pembrolizumab	PD-1	0	0	0	0	0	0	0	0	0	0	0	0	0	0	0	0	0	0	1	0	264	126	7.24	0.41	1.47	0.203039	5.09	0.703039	179.592	3.46259
1010932791	1751c3906c6c72c8617688013872bd7a	SCC	1	1	Arrhythmia	16	1	Ventricular Premature Beat (VPB)	male	77	55	170	19.0311	0	0	0	ICI	Sintilimab	PD-1	0	0	0	0	0	0	0	0	0	0	0	0	0	0	0	0	0	0	1	0	346	116	6.59	0.9	1.45	0.22003	3.65	0.553869	238.621	2.51724
1010935447	89d51c8af6ae7ce54d600eaec562dace	SCC	0	0	no	122	0	no	female	55	48	157	19.4734	0	0	0	ICI+chemotherapy	Tislelizumab	PD-1	1	0	0	0	0	1	1	0	0	0	0	0	0	0	0	0	0	0	0	0	220	118	1.88	0.08	0.37	0.196809	1.38	0.734043	594.595	3.72973
1010939347	fdedf678dcc2dafeb940a7ed3474a3e0	SCC	0	0	no	99.7143	0	no	male	71	55	178	17.3589	1	0	0	ICI+chemotherapy+antiangiogenic_therapy	Sintilimab	PD-1	1	0	0	1	0	0	1	1	0	0	0	0	0	1	0	0	1	0	0	0	104	127	3.36	0.24	1.42	0.422619	1.44	0.428571	73.2394	1.01408
1010942689	e040b44a58e5dd0007aa2477b8ab635a	SCC	0	0	no	123.714	0	no	male	68	75	172	25.3515	1	0	0	ICI+chemotherapy	Tislelizumab	PD-1	1	0	0	1	0	0	0	1	0	0	0	0	0	0	0	0	0	0	0	0	131	136	8.41	0.77	1.7	0.20214	5.84	0.694411	77.0588	3.43529
1010945646	9076e80e37002f2a062d5a9ae3382ea8	SCC	1	1	Arrhythmia	6	1	Ventricular Premature Beat (VPB)	male	60	72	172	24.3375	1	1	0	ICI+chemotherapy	Camilizumab	PD-1	1	1	0	0	0	0	0	1	0	0	0	0	0	0	0	0	0	0	1	0	273	147	6.61	0.89	1.47	0.22239	4.12	0.623298	185.714	2.80272
1010946647	f10cc192d06f59a93b9e7820b8005584	SCC	0	0	no	128.571	0	no	male	68	52	153	22.2137	1	1	0	ICI+chemotherapy	Camilizumab	PD-1	1	0	1	0	0	0	0	1	0	0	0	0	0	0	0	0	0	0	0	0	171	100	5.32	0.12	1.28	0.240602	3.74	0.703008	133.594	2.92188
1010949184	439ec75a4a4ae63cac5209abbc33de68	SCC	0	0	no	101.857	0	no	male	55	69	166	25.0399	1	0	0	ICI+antiangiogenic_therapy	Sintilimab	PD-1	0	0	0	0	0	0	0	0	0	0	0	0	0	1	0	1	0	0	0	0	251	162	5.15	0.28	1.02	0.198058	3.8	0.737864	246.078	3.72549
1010951566	9276f8fa832404a55ea977d8067cd508	SCC	0	0	no	90.5714	0	no	male	72	60	165	22.0386	1	1	0	ICI+antiangiogenic_therapy	Sintilimab	PD-1	0	0	0	0	0	0	0	0	0	0	0	0	0	1	0	0	1	0	0	0	297	88	8.65	1.07	1.49	0.172254	6.04	0.698266	199.329	4.05369
1010967183	3752b619c18d22b7cc7efe13cea5733d	SCC	0	0	no	129.429	0	no	male	67	45	165	16.5289	0	0	0	ICI+chemotherapy	Sintilimab	PD-1	1	0	0	1	0	0	0	0	1	0	0	0	0	0	0	0	0	1	1	0	569	107	3.97	1.21	1.38	0.347607	10.63	2.67758	412.319	7.7029
1010988734	ea1b7366053b2277c59090587903b02b	adenocarcinoma	0	0	no	109.714	0	no	male	56	60	166	21.7738	1	0	0	ICI+chemotherapy	Camilizumab	PD-1	1	1	1	0	0	0	0	1	1	0	0	0	0	0	0	0	0	0	0	0	321	107	7.04	0.39	0.91	0.129261	5.67	0.805398	352.747	6.23077
1010992990	52d249e77d7a2274bda5eb5fbb5f4ffe	adenocarcinoma	0	0	no	99.7143	0	no	male	51	76	170	26.1246	1	0	0	ICI	Durvalumab	PD-L1	0	0	0	0	0	0	0	0	0	0	0	0	0	0	0	0	0	0	0	0	364	120	7.52	0.81	0.66	0.087766	5.97	0.793883	551.515	9.04545
1011000219	3bbd1f8075530791fd848c6c93b07614	adenocarcinoma	0	0	no	123.429	0	no	male	76	55	162	20.9572	0	0	0	ICI+antiangiogenic_therapy	Tislelizumab	PD-1	0	0	0	0	0	0	0	0	0	0	0	0	0	1	0	1	0	1	0	0	143	128	4.46	0.37	1.26	0.282511	2.52	0.565022	113.492	2
1011018395	ecd19c2ea628580cbed351321172c228	SCC	0	0	no	114.857	0	no	female	53	56	149	25.2241	1	1	0	ICI+chemotherapy+antiangiogenic_therapy	Tislelizumab	PD-1	1	0	1	0	0	0	0	0	0	0	0	0	0	1	0	0	1	0	0	0	248	101	18.2	1.42	2.8	0.153846	13.79	0.757692	88.5714	4.925
1011018744	e9f7cb595d2aea3f16c63b56a0113402	SCC	0	0	no	118.857	0	no	female	58	64	155	26.6389	0	0	0	ICI+chemotherapy	Camilizumab	PD-1	1	0	0	0	1	0	0	1	0	0	0	0	0	0	0	0	0	0	0	0	294	110	8.13	0.7	1.24	0.152522	6.1	0.750308	237.097	4.91935
1011021651	a8bf5c36533d8ffca92e433cbf3d330b	SCC	0	0	no	129.429	0	no	female	83	46	158	18.3064	0	0	0	ICI	Pembrolizumab	PD-1	0	0	0	0	0	0	0	0	0	0	0	0	0	0	0	0	0	0	0	0	171	106	3.08	0.38	0.72	0.233766	1.8	0.584416	237.5	2.5
1011022067	c1518062e8320610899a7afa2232b02b	adenocarcinoma	0	0	no	109	0	no	male	69	78	176	25.1808	0	0	0	ICI+chemotherapy	Tislelizumab	PD-1	1	1	0	0	0	0	0	0	0	0	0	0	0	0	0	0	0	0	0	0	320	133	4.7	0.48	1.43	0.304255	2.68	0.570213	223.776	1.87413
1011026156	a50fcb17e834ba67cc409873d9673431	adenocarcinoma	1	2	Arrhythmia	14	1	T-wave Abnormality	male	44	75	172	25.3515	1	0	0	ICI+chemotherapy+antiangiogenic_therapy	Atezolizumab	PD-L1	1	1	1	0	0	0	0	0	0	0	0	0	0	1	1	0	0	0	0	0	248	117	4.87	0.38	1.22	0.250513	3.23	0.663244	203.279	2.64754
1011030299	ee7f954c5c10d90050a822ac19ee80c3	adenocarcinoma	0	0	no	130.714	0	no	male	66	25	96	27.1267	1	1	0	ICI+chemotherapy	Camilizumab	PD-1	1	0	1	0	0	0	0	1	0	0	0	0	0	0	0	0	0	0	0	0	241	136	5.83	0.47	1.45	0.248714	3.68	0.631218	166.207	2.53793
1011034034	e8163fee0737c1273f20264dc40279c5	adenocarcinoma	0	0	no	127	0	no	male	59	70	170	24.2215	0	0	0	ICI+chemotherapy	Sintilimab	PD-1	1	0	1	1	0	0	0	1	0	0	0	0	0	0	0	0	0	0	0	0	350	119	8.73	0.63	1.75	0.200458	6.21	0.71134	200	3.54857
1011037012	f4390a5c8b3013a4cf82b00682fcbd1d	adenocarcinoma	0	0	no	126.857	0	no	male	67	55	160	21.4844	1	0	0	ICI+chemotherapy	Camilizumab	PD-1	1	1	0	0	0	0	1	1	0	0	0	0	0	0	0	0	0	0	0	0	184	128	6.72	0.51	1.5	0.223214	4.38	0.651786	122.667	2.92
1011044534	d937b6b5c85c89a53352bcb94bf31dd3	adenocarcinoma	0	0	no	111.286	0	no	male	42	80	175	26.1224	1	0	0	ICI+chemotherapy+antiangiogenic_therapy	Pembrolizumab	PD-1	1	1	1	0	0	0	1	0	1	0	0	0	0	1	1	0	0	0	0	0	299	164	4.46	0.64	2.03	0.455157	1.68	0.376682	147.291	0.827586
1011055373	0d877a32c414e9bda88d55fb430d2922	SCC	0	0	no	126.714	0	no	male	82	73	170	25.0865	1	0	0	ICI+chemotherapy	Sintilimab	PD-1	1	0	1	0	0	0	0	0	0	0	0	0	0	0	0	0	0	0	1	0	241	114	5.2	0.19	1.35	0.259615	3.48	0.669231	178.519	2.57778
1011059444	cd6ed01b7b741f0e082d21ea4cc2f359	SCC	0	0	no	134.714	0	no	male	70	75	175	24.4898	0	0	0	ICI+chemotherapy	Tislelizumab	PD-1	1	0	1	0	0	0	0	1	0	0	0	0	0	0	0	0	0	0	0	0	184	110	10.91	0.95	1.46	0.133822	8.4	0.769936	126.027	5.75342
1011062173	6f794c19af7176b16560828c030edb49	SCC	0	0	no	126.857	0	no	male	67	56	165	20.5693	0	0	0	ICI+chemotherapy	Sintilimab	PD-1	1	1	0	0	0	0	0	1	0	0	0	0	0	0	0	0	0	0	0	0	602	113	7.46	1.14	2.46	0.329759	3.79	0.508043	244.715	1.54065
1011063443	5d586c7c5915135fb2a0af3223579959	SCC	0	0	no	94.5714	0	no	male	63	68	170	23.5294	1	0	0	ICI+antiangiogenic_therapy	Tislelizumab	PD-1	0	0	0	0	0	0	0	0	0	0	0	0	0	1	0	1	0	0	0	0	173	113	6.52	0.7	0.9	0.138037	4.68	0.717791	192.222	5.2
1011067554	4fe45dfc0555f0d207fe76600a2f15e6	adenocarcinoma	0	0	no	120.857	0	no	male	67	65	177	20.7476	0	0	0	ICI+chemotherapy	Tislelizumab	PD-1	1	0	0	0	0	0	0	1	0	0	0	0	0	0	0	0	0	0	0	1	214	139	6.81	0.57	0.97	0.142438	5.1	0.748899	220.619	5.25773
1011072032	50e7367d52cdf03fc6b7412685c2b4d7	SCC	0	0	no	97	0	no	male	60	53	162	20.1951	1	0	0	ICI+chemotherapy	Tislelizumab	PD-1	1	0	0	1	0	0	0	1	0	0	0	0	0	0	0	0	0	0	0	0	312	110	10.46	1.05	0.81	0.0774379	8.41	0.804015	385.185	10.3827
1011075044	29ab9dfe7fdf885196aa8af3497f3371	adenocarcinoma	1	1	Arrhythmia	2.5	1	Left Anterior Fascicular Block (LAFB)	male	74	62	170	21.4533	1	0	0	ICI+chemotherapy	Tislelizumab	PD-1	1	0	1	1	0	0	1	1	0	0	0	0	0	0	0	0	0	0	0	0	520	124	12.88	1.03	2.53	0.196429	9.17	0.711957	205.534	3.62451
1011075291	59bb39df842e0311d575156146412677	adenocarcinoma	0	0	no	129.429	0	no	male	68	68	172	22.9854	0	0	0	ICI+chemotherapy	Sintilimab	PD-1	1	1	0	0	0	0	0	0	1	0	0	0	0	0	0	0	0	0	0	0	429	110	4.08	0.74	1.65	0.404412	1.26	0.308824	260	0.763636
1011076214	465a0eda6b5bc81f4197786f0a416e3c	SCLC	0	0	no	128.857	0	no	male	48	68	165	24.977	1	0	0	ICI+chemotherapy	Camilizumab	PD-1	1	0	0	0	1	0	0	1	0	0	0	0	0	0	0	0	0	0	0	1	134	126	6.07	0.35	2.09	0.344316	3.28	0.540362	64.1148	1.56938
1011076221	1930ff623ddc022998700c8e21528511	SCC	0	0	no	89.2857	0	no	male	55	66	176	21.3068	1	0	0	ICI+chemotherapy+antiangiogenic_therapy	Pembrolizumab	PD-1	1	0	1	0	0	0	0	1	0	0	0	0	0	1	0	1	0	0	0	0	104	117	4.15	0.31	0.61	0.146988	3.11	0.749398	170.492	5.09836
1011077659	c22a46f0af8a14520b6388772985a40f	SCC	0	0	no	102.714	0	no	male	67	68	162	25.9107	0	0	1	ICI+chemotherapy+antiangiogenic_therapy	Pembrolizumab	PD-1	1	0	0	1	0	0	1	0	0	0	0	0	0	1	1	0	0	0	1	1	260	119	7.62	0.3	0.51	0.0669291	6.81	0.893701	509.804	13.3529
1011078482	441cb9cbe8ffbdd68d86921cfa6a041f	SCC	0	0	no	108.857	0	no	male	62	61	166	22.1367	1	0	0	ICI+chemotherapy+antiangiogenic_therapy	Tislelizumab	PD-1	1	0	1	0	0	0	1	0	0	0	0	0	0	1	0	0	1	0	0	0	195	98	12.64	0.57	0.28	0.0221519	11.78	0.931962	696.429	42.0714
1011082782	7e61efb6e859971d407e38cfcc2795ae	adenocarcinoma	0	0	no	131.429	0	no	male	65	60	170	20.7612	1	0	1	ICI+chemotherapy	Pembrolizumab	PD-1	1	1	1	0	0	1	1	1	0	0	0	0	0	0	0	0	0	0	0	0	428	109	16.37	1.43	2.14	0.130727	12.64	0.772144	200	5.90654
1011094901	5bb691045b342784f3b3dcc2e9362941	adenocarcinoma	0	0	no	114.857	0	no	female	79	48	150	21.3333	0	0	0	ICI	Tislelizumab	PD-1	0	0	0	0	0	0	0	0	0	0	0	0	0	0	0	0	0	0	1	0	151	116	4.64	0.4	1.41	0.303879	2.71	0.584052	107.092	1.92199
1011098253	c59b9df55b7f2a2c3008c80c8f391b07	adenocarcinoma	0	0	no	134.143	0	no	male	54	66	168	23.3844	0	0	0	ICI+chemotherapy+antiangiogenic_therapy	Camilizumab	PD-1	1	1	1	0	0	0	1	1	0	0	0	0	0	1	0	1	0	0	0	0	215	108	7.95	0.56	0.97	0.122013	6.38	0.802516	221.649	6.57732
1011100515	4db864bcf11c445983cc0642f196d142	adenocarcinoma	0	0	no	137	0	no	male	63	70	172	23.6614	0	0	0	ICI+chemotherapy+antiangiogenic_therapy	Sintilimab	PD-1	1	0	0	1	0	0	1	0	0	0	0	0	0	1	0	0	1	0	0	0	524	121	11.27	0.71	1.65	0.146406	8.75	0.776398	317.576	5.30303
1011104709	4a00b58ac66b96a189a4d4d190d3f69c	adenocarcinoma	0	0	no	134.286	0	no	female	66	56	171	19.1512	0	0	0	ICI+chemotherapy+antiangiogenic_therapy	Camilizumab	PD-1	1	1	0	0	0	0	0	1	0	0	0	0	0	1	0	1	0	0	0	0	208	128	5.25	0.48	1.47	0.28	3.13	0.59619	141.497	2.12925
1011111760	dd1c31056ec12ce558e9e14dcd10498b	adenocarcinoma	0	0	no	128.714	0	no	male	66	47	170	16.263	0	0	0	ICI+antiangiogenic_therapy	Pembrolizumab	PD-1	0	0	0	0	0	0	0	0	0	0	0	0	0	1	0	0	1	0	0	0	119	122	4.79	0.74	1.56	0.325678	2.39	0.498956	76.2821	1.53205
1011111825	de19ac2366877275567882b102a1ef3a	adenocarcinoma	0	0	no	125.571	0	no	female	31	50	160	19.5312	0	0	0	ICI+chemotherapy	Camilizumab	PD-1	1	1	0	0	0	0	0	1	0	0	0	0	0	0	0	0	0	0	0	0	313	131	6.72	0.59	2.39	0.355655	3.61	0.537202	130.962	1.51046
1011131870	a9b873d8896215f3e9f6ebb912a9df04	SCC	0	0	no	102.571	0	no	male	65	80	170	27.6817	0	0	0	ICI+chemotherapy	Tislelizumab	PD-1	1	0	1	0	0	0	0	1	0	0	0	0	0	0	0	0	0	0	0	0	202	132	5.8	0.5	1.58	0.272414	3.55	0.612069	127.848	2.24684
1011139108	56a0ae77a5518585fa9ba8a3b205ac7c	adenocarcinoma	1	1	Arrhythmia	3	1	T-wave Abnormality	male	70	75	172	25.3515	0	0	1	ICI+chemotherapy+antiangiogenic_therapy	Camilizumab	PD-1	1	1	0	0	0	0	1	0	0	0	0	0	0	1	0	1	0	0	0	0	364	124	7.75	0.75	1.6	0.206452	5.21	0.672258	227.5	3.25625
1011140870	c1e17aa02f6e02ac9cf3e70491ab4602	adenocarcinoma	0	0	no	115.429	0	no	male	65	60	169	21.0077	0	0	1	ICI+chemotherapy	Tislelizumab	PD-1	1	0	0	0	0	0	0	1	0	0	0	0	0	0	0	0	0	0	0	0	152	86	7.77	0.46	0.61	0.0785071	6.46	0.831403	249.18	10.5902
1011159003	c04f72b8d2bf51f7031e92c80e48bc24	adenocarcinoma	0	0	no	125.429	0	no	female	75	58	163	21.83	0	0	0	ICI+chemotherapy+antiangiogenic_therapy	Camilizumab	PD-1	1	1	0	0	0	0	0	0	0	0	0	0	0	1	0	1	0	0	0	0	348	124	8.05	0.57	1.63	0.202484	5.72	0.710559	213.497	3.5092
1011167339	a9ae9f1c003882b98de4a2475f38f433	SCC	0	0	no	124.429	0	no	male	72	68	166	24.677	1	0	0	ICI+chemotherapy	Sintilimab	PD-1	1	0	1	0	0	0	0	1	0	0	0	0	0	0	0	0	0	0	1	0	188	137	9.41	0.75	1.94	0.206164	6.61	0.702444	96.9072	3.40722
1011191928	997e4aa303226e34cd9b391ed2f0a033	adenocarcinoma	0	0	no	129.143	0	no	male	58	55	163	20.7761	0	0	0	ICI+chemotherapy	Sintilimab	PD-1	1	0	1	0	0	0	1	0	0	0	0	0	0	0	0	0	0	0	0	0	307	139	7.23	0.64	1.96	0.271093	4.4	0.608575	156.633	2.2449
1011192180	14294362e96da39807b223694e1ee001	SCC	0	0	no	128.143	0	no	male	62	50	159	19.7777	0	0	0	ICI+chemotherapy	Sintilimab	PD-1	1	0	1	0	0	0	0	1	0	0	0	0	0	0	0	0	0	0	0	0	248	137	7.02	0.54	1.67	0.237892	4.3	0.612536	148.503	2.57485
1011199706	7f756fb1deeee14bc27e423d8dd08877	adenocarcinoma	0	0	no	117.714	0	no	male	64	57	155	23.7253	1	1	0	ICI+chemotherapy	Sintilimab	PD-1	1	1	0	0	0	0	0	1	0	0	0	0	0	0	0	0	0	0	0	0	443	139	10.37	0.82	1.77	0.170685	7.61	0.733848	250.282	4.29944
1011209435	4f62ae2af5e7cb65fd5c17a2d2b71a75	SCC	0	0	no	103	0	no	male	62	67	164	24.9108	1	1	0	ICI+chemotherapy	Sintilimab	PD-1	1	0	0	1	0	0	0	1	0	0	0	0	0	0	0	0	0	0	1	0	398	110	5.63	0.76	0.7	0.124334	3.71	0.65897	568.571	5.3
1011212098	6d3e38ba16f96a1d6eeb2ac1f828cb91	SCC	0	0	no	116.714	0	no	male	69	63	167	22.4103	1	0	0	ICI+chemotherapy	Tislelizumab	PD-1	1	0	1	0	0	0	0	1	0	0	0	0	0	0	0	0	0	0	0	0	202	127	6.87	0.44	1.87	0.272198	4.42	0.643377	108.021	2.36364
1011212734	8f4b28b38a110749a4657aa7060e3de6	adenocarcinoma	0	0	no	48.1429	0	no	female	64	60	162	22.8624	0	0	0	ICI+chemotherapy+antiangiogenic_therapy	Sintilimab	PD-1	1	1	0	0	0	0	0	1	0	0	0	0	0	1	0	1	0	0	0	0	243	141	6.59	0.44	1.82	0.276176	4.15	0.629742	133.516	2.28022
1011218937	d83b37c0080e5fdbe3008e7c95c283dd	NSCLC	0	0	no	127.429	0	no	male	69	60	168	21.2585	0	0	0	ICI+chemotherapy	Pembrolizumab	PD-1	1	0	0	1	0	0	0	0	1	0	0	0	0	0	0	0	0	0	0	0	333	87	9.08	0.83	1.63	0.179515	6.49	0.714758	204.294	3.9816
1011225539	4ca6938ae2674bec88c5b9c966214985	adenocarcinoma	0	0	no	127.429	0	no	male	60	70	171	23.9048	1	1	0	ICI+chemotherapy+antiangiogenic_therapy	Pembrolizumab	PD-1	1	1	0	0	0	0	0	1	0	0	0	0	0	1	0	1	1	0	0	0	462	133	12.67	1.12	1.52	0.119968	9.8	0.773481	303.947	6.44737
1011272896	4ef683bc6e892929fc6c6257c53695a6	SCC	0	0	no	113.286	0	no	female	41	50	161	19.2894	0	0	0	ICI+chemotherapy	Tislelizumab	PD-1	1	0	1	0	0	0	1	0	0	0	0	0	0	0	0	0	0	0	0	0	149	103	3.16	0.36	1.02	0.322785	1.7	0.537975	146.078	1.66667
1011273044	836a38bc970366cb96b840494fa90eec	SCC	0	0	no	105.857	0	no	male	81	103	186	29.7722	1	0	0	ICI	Sintilimab	PD-1	0	0	0	0	0	0	0	0	0	0	0	0	0	0	0	0	0	1	1	1	120	132	4.51	0.64	1.39	0.308204	2.38	0.527716	86.3309	1.71223
1011273518	04d068b5b8b481dd78bd738b5e17641b	SCC	0	0	no	111	0	no	male	68	82	170	28.3737	1	0	0	ICI+chemotherapy	Atezolizumab	PD-L1	1	0	0	0	0	1	0	0	0	0	0	0	0	0	0	0	0	1	1	0	200	96	7.53	0.3	1.13	0.150066	5.9	0.783533	176.991	5.22124
1011285194	83e3b7149a57d54cfc9250d5103d096b	SCC	0	0	no	103.571	0	no	male	69	67	170	23.1834	1	0	0	ICI+chemotherapy	Pembrolizumab	PD-1	1	0	1	0	0	0	0	1	0	0	0	0	0	0	0	0	0	0	0	0	250	112	9.83	1.03	2.11	0.214649	6.43	0.65412	118.483	3.04739
1011287255	35e4b4502b7803648469228dac67a8f1	SCC	0	0	no	101.286	0	no	male	63	73	172	24.5065	0	0	0	ICI+chemotherapy	Tislelizumab	PD-1	1	1	0	0	0	0	0	1	0	0	0	0	0	0	0	0	0	1	0	0	299	135	8.64	0.81	0.96	0.111111	6.65	0.769676	311.458	6.92708
1011345167	b2e8840d6a82f7537bb131e1378efe73	SCLC	0	0	no	109.429	0	no	male	75	80	169	28.0102	1	0	0	ICI+chemotherapy	Tislelizumab	PD-1	1	0	1	0	0	0	0	1	0	0	0	0	0	0	0	0	0	0	1	0	364	136	13.67	1.06	2.95	0.215801	9.36	0.684711	123.39	3.17288
1011348658	fb3ba0cefc03612d30ccb909e4df01e3	adenocarcinoma	0	0	no	101.857	0	no	male	33	60	177	19.1516	1	0	0	ICI+chemotherapy	Tislelizumab	PD-1	1	1	0	0	0	0	0	1	0	0	0	0	0	0	0	0	0	0	0	0	222	124	9.01	0.8	1.97	0.218646	6.11	0.678135	112.69	3.10152
1011381159	0433caffa9633455450c85f55b7e8d4c	adenocarcinoma	0	0	no	101.857	0	no	male	82	56	165	20.5693	1	1	0	ICI	Tislelizumab	PD-1	0	0	0	0	0	0	0	0	0	0	0	0	0	0	0	0	0	0	1	0	234	111	7.62	0.74	1.64	0.215223	4.58	0.60105	142.683	2.79268
1011384872	1dcaab56158ab77699ad1d9817fd3a84	adenocarcinoma	0	0	no	97.5714	0	no	female	60	50	158	20.0288	0	0	0	ICI+chemotherapy+antiangiogenic_therapy	Pembrolizumab	PD-1	1	1	1	0	0	0	1	1	0	0	0	0	0	1	1	1	0	0	0	0	147	112	5.9	0.36	0.54	0.0915254	4.93	0.835593	272.222	9.12963
1011388396	cd5ac117b0366a77b1f1ab6b7e7426b4	adenocarcinoma	0	0	no	103.714	0	no	male	68	68	170	23.5294	1	0	0	ICI+chemotherapy+antiangiogenic_therapy	Camilizumab	PD-1	1	1	0	0	0	0	1	1	0	0	0	0	0	1	0	0	1	0	0	0	329	137	4.79	0.67	1.62	0.338205	2.32	0.484342	203.086	1.4321
1011392935	ee5d4883dec62c7977eb8430da990270	NET	0	0	no	105	0	no	male	58	70	180	21.6049	1	0	0	ICI+chemotherapy	Durvalumab	PD-L1	1	0	0	0	1	0	0	1	0	0	0	0	0	0	0	0	0	0	1	0	110	121	7.29	0.05	0.81	0.111111	6.41	0.879287	135.802	7.91358
1011393414	447f5d0c97e2c875a602cab503a4fdfc	SCLC	0	0	no	103.571	0	no	male	59	66	172	22.3094	1	0	0	ICI+chemotherapy	Durvalumab	PD-L1	1	0	0	0	1	0	0	1	0	0	0	0	0	0	0	0	0	0	0	0	356	122	13.17	1.16	2.54	0.192863	9.13	0.693242	140.157	3.59449
1011401263	c697e23912daf3b913cfd958b037c106	SCC	0	0	no	93.8571	0	no	female	64	56	175	18.2857	0	0	0	ICI+chemotherapy	Atezolizumab	PD-L1	1	0	0	0	1	0	0	1	0	0	0	0	0	0	0	0	0	0	0	0	280	108	3.65	0.34	0.48	0.131507	2.81	0.769863	583.333	5.85417
1011416957	0620aa31d79596edfcde4b155072b9b9	SCC	0	0	no	104.143	0	no	male	79	79	178	24.7759	1	1	0	ICI+chemotherapy	Pembrolizumab	PD-1	1	0	1	0	0	0	0	1	0	0	0	0	0	0	0	0	0	0	0	0	219	136	4.95	0.5	1.35	0.272727	2.83	0.571717	162.222	2.0963
1011434394	6ddf36c4311caaeeabb423198ebc4977	SCC	0	0	no	85.8571	0	no	male	58	66	159	26.1066	1	1	0	ICI+chemotherapy	Pembrolizumab	PD-1	1	0	1	0	0	0	1	0	0	0	0	0	0	0	0	0	0	0	0	0	482	113	7.19	0.76	2.18	0.303199	4.07	0.566064	221.101	1.86697
1011436360	bc67364314d85ef2b4554fee76b1253e	adenocarcinoma	0	0	no	103.714	0	no	male	62	90	178	28.4055	0	0	0	ICI+chemotherapy	Sintilimab	PD-1	1	1	0	0	0	0	0	1	0	0	0	0	0	0	0	0	0	0	0	0	136	114	3.43	0.4	0.74	0.215743	2.13	0.620991	183.784	2.87838
1011460312	bcfeda5c46e8001c998de699457f3892	SCC	0	0	no	93.4286	0	no	male	76	62	164	23.0518	0	0	0	ICI+chemotherapy	Pembrolizumab	PD-1	1	0	1	0	0	0	0	0	1	0	0	0	0	0	0	0	0	0	0	0	287	129	11.59	1.07	1.73	0.149267	8.54	0.736842	165.896	4.93642
1011465732	4e5c41e841ded66822f9e88f57c3d558	adenocarcinoma	0	0	no	91.2857	0	no	female	62	53	159	20.9644	0	0	0	ICI+chemotherapy	Tislelizumab	PD-1	1	1	1	0	0	0	0	0	1	0	0	0	0	0	0	0	0	0	0	0	176	130	3.61	0.28	1.01	0.279778	2.27	0.628809	174.257	2.24752
2001076850	c9029c4ee52bdab40bac57a7d5ce651b	SCLC	0	0	no	183	0	no	female	61	63	161	24.3046	0	0	0	ICI+chemotherapy	Sintilimab	PD-1	1	1	0	0	0	0	1	1	0	0	0	0	0	0	0	0	0	1	1	0	218	125	6.49	0.56	1.35	0.208012	4.4	0.677966	161.481	3.25926
2001107948	542461344e83f9615b639097f34e0b01	adenocarcinoma	0	0	no	52.8571	0	no	male	73	68	168	24.093	1	0	0	ICI+chemotherapy	Pembrolizumab	PD-1	1	1	0	0	0	0	0	0	1	0	0	0	0	0	0	0	0	0	1	0	159	136	6.63	0.03	0.53	0.0799397	6.04	0.911011	300	11.3962
2001158568	962f497fa096985646ba08fc16d68b5d	adenocarcinoma	0	0	no	137.571	0	no	female	61	55	169	19.257	0	0	0	ICI+chemotherapy+antiangiogenic_therapy	Atezolizumab	PD-L1	1	1	0	0	0	0	0	0	0	0	0	0	0	1	1	0	1	0	0	0	171	129	7.17	0.83	0.27	0.0376569	5.98	0.834031	633.333	22.1481
2001159753	9171d9ed3a0deee62cb637b8e0a4d905	SCC	0	0	no	115	0	no	male	72	72	174	23.7812	1	0	1	ICI+chemotherapy+antiangiogenic_therapy	Sintilimab	PD-1	1	0	0	1	0	0	1	0	0	0	0	0	0	1	0	1	0	0	0	0	94	104	4.01	0.66	0.7	0.174564	2.56	0.638404	134.286	3.65714
2001214413	d8a9239e0db473aaa3ee082a7296ea80	adenocarcinoma	0	0	no	163.429	0	no	male	78	75	170	25.9516	1	0	0	ICI+chemotherapy+antiangiogenic_therapy	Pembrolizumab	PD-1	1	1	0	0	0	0	0	0	1	0	0	0	0	1	1	0	0	0	0	0	202	117	6.12	0.66	1.49	0.243464	3.89	0.635621	135.57	2.61074
2001387692	3f4d483e7dd0a0776b8557ba9dbe076a	adenocarcinoma	0	0	no	114	0	no	male	72	55	158	21.8314	1	1	0	ICI+chemotherapy	Durvalumab	PD-L1	1	0	0	0	1	0	1	0	1	0	0	0	0	0	0	0	0	1	0	0	128	134	7.7	0.46	1.35	0.175325	4.87	0.632468	94.8148	3.60741
2001430664	da732532b2f43a674ae7704bb13f9b92	SCC	0	0	no	151.714	0	no	female	59	70	171	23.939	0	0	1	ICI+chemotherapy+targeted_therapy	Pembrolizumab	PD-1	1	1	0	0	0	0	0	0	1	1	0	0	0	0	0	0	0	0	0	0	317	128	7.55	0.7	1.82	0.24106	4.75	0.629139	174.176	2.60989
2001557197	1028dc75c93b8ff1da2bb4a38ddf1c77	adenocarcinoma	0	0	no	76.4286	0	no	male	64	65	171	22.2291	0	0	0	ICI+chemotherapy	Pembrolizumab	PD-1	1	0	1	0	0	0	0	1	0	0	0	0	0	0	0	0	0	1	1	0	287	128	6.25	0.42	1.65	0.264	4.05	0.648	173.939	2.45455
2001579236	a3f8a78f7b80a1441d34d90220c749d7	adenocarcinoma	0	0	no	56.8571	0	no	male	62	60	168	21.2585	0	0	0	ICI+chemotherapy	Tislelizumab	PD-1	1	0	1	0	0	0	0	1	0	0	0	0	0	0	0	0	0	0	0	0	138	102	2.73	0.31	0.57	0.208791	1.83	0.67033	242.105	3.21053
2001579887	68b08661f273ecaa3b7b067c8514bca8	adenocarcinoma	1	1	Arrhythmia	6	1	Left Anterior Fascicular Block (LAFB)	male	61	65	168	23.03	1	1	0	ICI	Pembrolizumab	PD-1	0	0	0	0	0	0	0	0	0	0	0	0	0	0	0	0	0	0	0	0	148	122	4.12	0.56	0.88	0.213592	2.53	0.614078	168.182	2.875
2001588235	207f70012070fc8b7dcd8fbc7beca197	adenocarcinoma	0	0	no	264.571	0	no	male	70	48	157	19.4734	1	1	0	ICI+chemotherapy	Pembrolizumab	PD-1	1	1	0	0	0	0	0	0	0	0	0	0	0	0	0	0	0	0	0	0	239	105	9.86	0.58	1.14	0.115619	7.74	0.78499	209.649	6.78947
2001632854	432f701c9db7de94fa4ffd60fd0fa81c	adenocarcinoma	0	0	no	53.1429	0	no	male	66	60	168	21.2585	0	0	0	ICI+chemotherapy	Tislelizumab	PD-1	1	0	1	0	0	0	0	1	0	0	0	0	0	0	0	0	0	0	0	0	312	118	10.16	0.69	1.39	0.136811	7.72	0.759843	224.46	5.55396
2001650986	06b9d21a5f09f78442d2ccdaf4650d4f	adenocarcinoma	0	0	no	189.286	0	no	male	82	82	171	28.0428	0	0	0	ICI+antiangiogenic_therapy	Sintilimab	PD-1	0	0	0	0	0	0	0	0	0	0	0	0	0	1	0	1	0	0	0	0	181	110	4.73	0.45	1.27	0.268499	2.96	0.625793	142.52	2.33071
2001677487	4f46644f5f99f813477f43c10186a306	NSCLC	0	0	no	127.429	0	no	female	74	77	159	30.4577	0	0	0	ICI	Tislelizumab	PD-1	0	0	0	0	0	0	0	0	0	0	0	0	0	0	0	0	0	0	0	0	120	127	7.53	0.55	1.56	0.207171	5.35	0.710491	76.9231	3.42949
2001703723	444f00e75704322543b1576cb004451e	adenocarcinoma	0	0	no	119.857	0	no	male	65	61	163	22.9591	1	0	0	ICI+chemotherapy+antiangiogenic_therapy	Pembrolizumab	PD-1	1	0	1	0	0	0	0	0	0	0	0	0	0	1	1	0	0	0	0	0	107	126	4.02	0.32	1.7	0.422886	1.81	0.450249	62.9412	1.06471
2001711587	1900887acda45b5c62e3e67b9e3bbf39	adenocarcinoma	0	0	no	94.7143	0	no	male	84	48	165	17.6309	1	0	1	ICI+chemotherapy	Durvalumab	PD-L1	1	0	1	0	0	0	0	0	0	0	0	0	0	0	0	0	0	0	0	1	246	115	3.13	0.41	0.72	0.230032	1.83	0.584665	341.667	2.54167
2001782272	9480b1dddbf1851cb236186416406b67	adenocarcinoma	0	0	no	132.714	0	no	female	68	50	155	20.8117	0	0	0	ICI+chemotherapy+antiangiogenic_therapy	Durvalumab	PD-L1	1	0	0	0	1	1	0	1	0	0	0	0	0	1	0	1	0	0	0	0	190	124	3.12	0.27	0.62	0.198718	2.19	0.701923	306.452	3.53226
2001783948	86148acfe2e71160c9115bada3ecd295	adenocarcinoma	0	0	no	151	0	no	female	65	50	169	17.5064	0	0	0	ICI	Atezolizumab	PD-L1	0	0	0	0	0	0	0	0	0	0	0	0	0	0	0	0	0	0	0	0	135	126	3.11	0.23	0.73	0.234727	2.18	0.700965	184.932	2.9863
2001792486	89d42ec5250dbe9ac473d5fcb3f493e9	SCC	0	0	no	186.429	0	no	male	69	66	173	22.0522	0	1	1	ICI+chemotherapy	Camilizumab	PD-1	1	0	1	0	0	0	0	0	0	0	0	0	0	0	0	0	0	0	0	0	80	131	5.22	0.61	0.93	0.178161	3.46	0.662835	86.0215	3.72043
2001796668	801db17e24822e6c129e3b55584d7ca7	SCC	0	0	no	165.857	0	no	male	65	77	178	24.3025	1	1	0	ICI+chemotherapy	Pembrolizumab	PD-1	1	0	0	0	0	0	0	1	0	0	0	0	0	0	0	0	0	0	0	0	171	109	5.41	0.56	1.37	0.253235	3.3	0.609982	124.818	2.40876
2001816881	c7b1ed579a28e4bf52ab7e3bfeba90fc	SCC	0	0	no	121.571	0	no	male	68	84	176	27.1178	1	1	0	ICI+chemotherapy	Pembrolizumab	PD-1	1	0	1	0	0	0	1	0	0	0	0	0	0	0	0	0	0	0	0	0	211	130	4.28	0.21	0.81	0.189252	3.16	0.738318	260.494	3.90123
2001895809	a8e75ee839d4457e86774c8e6894e44a	SCC	0	0	no	81.1429	0	no	male	75	48	173	16.038	1	1	0	ICI+chemotherapy	Sintilimab	PD-1	1	0	1	0	0	0	0	0	0	0	0	0	0	0	0	0	0	0	0	0	204	126	5.54	0.5	1.2	0.216606	3.15	0.568592	170	2.625
2001898375	6b3849095987687ddd2fd6fe809d648b	adenocarcinoma	0	0	no	132.571	0	no	male	80	57	160	22.2656	1	0	0	ICI+chemotherapy	Pembrolizumab	PD-1	1	1	0	0	0	0	0	0	0	0	0	0	0	0	0	0	0	1	0	0	274	145	8.05	0.63	2.2	0.273292	4.83	0.6	124.545	2.19545
2001924411	c6286de44520367d0a8be4f811bdde4f	SCC	0	0	no	172.429	0	no	male	62	53	155	22.0604	1	1	1	ICI+chemotherapy+antiangiogenic_therapy	Durvalumab	PD-L1	1	0	1	0	0	0	0	0	0	0	0	0	0	1	1	0	0	0	1	0	167	144	4.52	0.4	1.41	0.311947	2.47	0.54646	118.44	1.75177
2001937161	05e13f4676f856c1a29984220a76b498	adenocarcinoma	0	0	no	231.857	0	no	male	71	62	172	20.9573	1	1	0	ICI+chemotherapy	Pembrolizumab	PD-1	1	1	0	0	0	0	0	1	0	0	0	0	0	0	0	0	0	0	0	0	299	109	5.64	0.53	1.17	0.207447	3.8	0.673759	255.556	3.24786
2001942629	edaca22ad168b7c10ed8543d3e64b896	SCC	0	0	no	86.4286	0	no	male	66	65	162	24.7676	1	1	0	ICI+chemotherapy	Tislelizumab	PD-1	1	0	1	0	0	0	0	0	1	0	0	0	0	0	0	0	0	0	1	0	177	142	4.56	0.28	1.14	0.25	3.1	0.679825	155.263	2.7193
2001943041	2791e1a8e74ac804238752a066c69b74	adenocarcinoma	0	0	no	234.143	0	no	male	53	54	161	20.8325	1	0	0	ICI	Pembrolizumab	PD-1	0	0	0	0	0	0	0	0	0	0	0	0	0	0	0	0	0	0	0	0	218	99	9.76	0.77	2.91	0.298156	6.03	0.617828	74.9141	2.07216
2001952187	9a4b2884eb8fe8050003b603c1e64312	SCC	0	0	no	187.857	0	no	male	67	64	169	22.4082	1	1	0	ICI+chemotherapy	Pembrolizumab	PD-1	1	0	1	0	0	0	0	0	0	0	0	0	0	0	0	0	0	0	1	0	211	128	6.97	0.96	1.72	0.246772	4	0.573888	122.674	2.32558
2001961204	a99c98665f66ac96c0478d32b27bf73e	adenocarcinoma	0	0	no	243.286	0	no	male	38	89	175	29.0612	1	1	1	ICI+chemotherapy	Pembrolizumab	PD-1	1	1	0	0	0	0	1	0	0	0	0	0	0	0	0	0	0	0	0	0	226	147	5	0.49	1.44	0.288	2.93	0.586	156.944	2.03472
2002006419	25f954f061919655f1c9c41f1758900d	NET	0	0	no	149.286	0	no	male	75	70	178	22.0932	0	0	0	ICI+chemotherapy	Durvalumab	PD-L1	1	0	0	0	1	1	0	1	0	0	0	0	0	0	0	0	0	1	0	0	341	109	6.91	0.68	1.74	0.251809	4.18	0.60492	195.977	2.4023
2002038320	e6feaedfbb200a0ac48071d67589e2ea	adenocarcinoma	0	0	no	150.286	0	no	female	57	50	150	22.2222	0	0	0	ICI+chemotherapy+antiangiogenic_therapy	Sintilimab	PD-1	1	0	1	1	0	0	0	0	0	0	0	0	0	1	0	1	1	0	0	0	232	118	11.45	0.62	2.23	0.19476	8.47	0.739738	104.036	3.79821
2002158185	31b7ee91001f2aa0d3045c82b562e578	adenocarcinoma	0	0	no	101	0	no	male	66	57	155	23.7253	1	0	0	ICI+chemotherapy	Sintilimab	PD-1	1	0	1	0	0	0	0	0	0	0	0	0	0	0	0	0	0	0	0	0	177	123	6.16	0.57	2.08	0.337662	3.29	0.534091	85.0962	1.58173
2002166416	e16aa99108104dc0f7cc73a90d96cdc6	adenocarcinoma	0	0	no	225.714	0	no	male	69	72	180	22.2222	1	1	0	ICI+chemotherapy	Camilizumab	PD-1	1	0	0	0	0	0	0	1	0	0	0	0	0	0	0	0	0	0	0	0	138	157	5.53	0.64	1.95	0.352622	2.69	0.486438	70.7692	1.37949
2002177613	db1348d84e8c67c17b0af09289686fd7	adenocarcinoma	0	0	no	186.714	0	no	male	69	65	171	22.3317	1	1	0	ICI	Sintilimab	PD-1	0	0	0	0	0	0	0	0	0	0	0	0	0	0	0	0	0	1	1	0	215	130	6.92	0.51	1.31	0.189306	4.87	0.703757	164.122	3.71756
2002195424	42cc10024a67698a4a688c51f7d84314	SCC	0	0	no	77.7143	0	no	male	80	41	163	15.4315	1	0	0	ICI+chemotherapy	Pembrolizumab	PD-1	1	0	1	0	0	0	0	0	0	0	0	0	0	0	0	0	0	0	0	0	132	102	3.17	0.6	0.73	0.230284	1.49	0.470032	180.822	2.0411
2002214115	2bfe4fc58aa17d91cbc7628af7f5ddb3	SCC	0	0	no	100.857	0	no	female	68	54	150	23.9111	0	0	0	ICI+chemotherapy	Sintilimab	PD-1	1	1	0	0	0	0	0	0	0	0	0	0	0	0	0	0	0	0	0	0	294	115	6.5	0.46	1.75	0.269231	4.08	0.627692	168	2.33143
2002228282	0553c643a213b44b476bf1b2a8b135d9	SCC	0	0	no	36.8571	0	no	female	54	43	153	18.369	1	1	0	ICI+chemotherapy	Tislelizumab	PD-1	1	0	1	0	0	0	0	1	0	0	0	0	0	0	0	0	0	0	0	0	332	96	4.75	0.58	0.23	0.0484211	3.82	0.804211	1443.48	16.6087
2002260734	9cd9f61c85890f0781b6d9bbce485c57	adenocarcinoma	0	0	no	154.429	0	no	female	46	54	155	22.4766	0	0	0	ICI+chemotherapy+antiangiogenic_therapy	Pembrolizumab	PD-1	1	1	1	0	0	0	1	1	0	0	0	0	0	1	1	1	0	0	0	0	280	132	5.25	0.33	1.28	0.24381	3.54	0.674286	218.75	2.76562
2002285470	a8637a4b0e5d26bcd6edf7abc9f76537	adenocarcinoma	0	0	no	161	0	no	female	47	70	164	26.0262	0	0	0	ICI+chemotherapy+antiangiogenic_therapy	Pembrolizumab	PD-1	1	0	1	1	0	0	0	0	0	0	0	0	0	1	1	0	0	0	0	0	436	134	14.43	1.25	2.4	0.16632	9.22	0.638947	181.667	3.84167
2002295176	db3b3ce7a841fae93ee8fd56127568e8	SCC	0	0	no	133	0	no	male	62	42	166	15.2417	1	1	0	ICI+chemotherapy	Tislelizumab	PD-1	1	0	1	0	0	0	1	0	0	0	0	0	0	0	0	0	0	0	0	0	174	94	6.7	0.33	1.94	0.289552	4.25	0.634328	89.6907	2.19072
2002298341	814604aedf5c90e81aad46527f178ba4	SCC	0	0	no	191.571	0	no	male	60	84	175	27.4286	1	1	0	ICI+chemotherapy	Tislelizumab	PD-1	1	0	0	1	0	0	1	1	0	0	0	0	0	0	0	0	0	0	0	0	153	79	3.81	0.54	0.64	0.167979	2.54	0.666667	239.062	3.96875
2002298905	09036579f9d3c352bf51ec7e794cc109	SCC	0	0	no	190.857	0	no	male	66	81	177	25.8546	0	0	0	ICI+chemotherapy	Camilizumab	PD-1	1	0	1	0	0	0	0	0	0	0	0	0	0	0	0	0	0	0	0	0	423	88	5.83	0.54	0.75	0.128645	4.47	0.766724	564	5.96
2002314152	b5abeae3e16bd73beb783dd5e86751bf	SCC	0	0	no	159.286	0	no	female	49	47	153	20.0777	0	0	0	ICI+chemotherapy+antiangiogenic_therapy	Sintilimab	PD-1	1	0	1	1	0	0	0	1	0	0	0	0	0	1	0	1	1	0	0	0	362	99	2.81	0.27	0.53	0.188612	1.81	0.644128	683.019	3.41509
2002322145	a842ca675950ca906986e6bc5a5572cc	adenocarcinoma	0	0	no	153.571	0	no	female	59	52	165	19.1001	0	0	0	ICI+chemotherapy+antiangiogenic_therapy	Camilizumab	PD-1	1	0	1	0	0	0	0	0	0	0	0	0	0	1	0	1	0	0	0	0	189	117	20.13	0.19	0.65	0.0322901	1.09	0.054148	290.769	1.67692
2002344677	156888e5a330cc44c3150a685db7cf06	SCC	0	0	no	121.143	0	no	male	66	56	170	19.3772	1	1	0	ICI+chemotherapy	Camilizumab	PD-1	1	0	1	0	0	0	0	0	0	0	0	0	0	0	0	0	0	0	0	0	204	84	6.95	0.54	0.93	0.133813	5.25	0.755396	219.355	5.64516
2002350372	2524d9088f7a9f5f070a7dd5048d5910	SCLC	0	0	no	144.143	0	no	male	69	70	170	24.2215	0	0	0	ICI+chemotherapy	Durvalumab	PD-L1	1	0	0	0	1	0	0	0	0	0	0	0	0	0	0	0	0	0	0	0	151	112	7.02	0.65	0.93	0.132479	5.17	0.736467	162.366	5.55914
2002362678	3461db1861a2b813e18f58132ec7c13c	adenocarcinoma	0	0	no	161.571	0	no	male	63	60	159	23.7332	1	0	0	ICI+chemotherapy	Pembrolizumab	PD-1	1	1	0	0	0	0	0	1	0	0	0	0	0	0	0	0	0	0	0	0	229	151	5.33	0.43	1.67	0.313321	3.1	0.581614	137.126	1.85629
2002374024	efc598015a2f58a88df6ea7e1569b3ec	adenocarcinoma	0	0	no	127.429	0	no	male	56	56	163	21.0772	0	0	0	ICI+chemotherapy	Tislelizumab	PD-1	1	0	1	0	0	0	0	1	0	0	0	0	0	0	0	0	0	0	0	0	244	98	10.79	1.61	1.74	0.16126	5.7	0.528267	140.23	3.27586
2002377960	62adc979d80cb26b60b2add47ea3651f	SCC	0	0	no	95.4286	0	no	male	66	45	153	19.2234	1	0	0	ICI+chemotherapy	Sintilimab	PD-1	1	0	1	0	0	0	0	1	0	0	0	0	0	0	0	0	0	0	1	0	329	133	7.1	0.56	1.16	0.16338	5.33	0.750704	283.621	4.59483
2002400515	8dbf0efd534ce68911d63b88fdac375a	adenocarcinoma	0	0	no	118.714	0	no	male	70	79	163	29.7339	1	0	0	ICI	Pembrolizumab	PD-1	0	0	0	0	0	0	0	0	0	0	0	0	0	0	0	0	0	0	0	0	193	106	6.98	0.73	1.85	0.265043	4.13	0.591691	104.324	2.23243
2002425533	d4ccb01d4421849718569ab950d894cb	adenocarcinoma	0	0	no	159.143	0	no	male	68	62	163	23.3355	0	0	1	ICI+chemotherapy	Nivolumab	PD-1	1	1	0	0	0	0	0	0	1	0	0	0	0	0	0	0	0	0	0	0	341	128	5.44	0.62	1.05	0.193015	3.29	0.604779	324.762	3.13333
2002441635	1339ac101a046d22c46eb4eec2c91a47	SCC	0	0	no	158.571	0	no	male	62	60	169	21.0077	1	1	0	ICI+chemotherapy	Pembrolizumab	PD-1	1	0	0	1	0	0	0	1	0	0	0	0	0	0	0	0	0	0	0	0	222	162	5.74	0.43	1.48	0.25784	3.62	0.630662	150	2.44595
2002443648	07a020d6b256e45585cfe2e22d42764c	adenocarcinoma	0	0	no	155.286	0	no	male	51	61	162	23.2434	1	0	0	ICI+chemotherapy	Pembrolizumab	PD-1	1	1	0	0	0	0	0	1	0	0	0	0	0	0	0	0	0	0	0	0	266	136	12.86	0.29	1.32	0.102644	11.24	0.874028	201.515	8.51515
2002453210	b1ada22771e0bba9af74819bbe27c90b	adenocarcinoma	0	0	no	154.286	0	no	male	69	55	161	21.2183	1	0	0	ICI+chemotherapy	Camilizumab	PD-1	1	0	1	0	0	0	0	1	0	0	0	0	0	0	0	0	0	0	0	0	477	104	8.14	0.55	1.01	0.124079	6.4	0.786241	472.277	6.33663
2002464254	3ad4696b7c60ce3cc174e35ecf5b52cd	NSCLC	0	0	no	153.857	0	no	male	51	55	164	20.4491	1	0	0	ICI+chemotherapy+antiangiogenic_therapy	Tislelizumab	PD-1	1	0	1	0	0	0	0	1	0	0	0	0	0	1	0	0	1	0	0	0	124	112	4.33	0.22	1.04	0.240185	2.97	0.685912	119.231	2.85577
2002464983	d1ddf3a811e37a7c7a7024c8ca337abb	SCLC	0	0	no	151.286	0	no	male	63	75	178	23.6713	1	1	0	ICI+chemotherapy+antiangiogenic_therapy	Camilizumab	PD-1	1	1	0	0	0	0	0	1	0	0	0	0	0	1	0	0	1	0	0	1	237	150	5.51	0.89	2.19	0.397459	2.36	0.428312	108.219	1.07763
2002515083	fb965317c2ba31f9af2c3802e3c849a1	SCC	0	0	no	148.143	0	no	male	52	77	182	23.095	1	1	0	ICI+chemotherapy	Sintilimab	PD-1	1	0	1	1	0	0	0	1	0	0	0	0	0	0	0	0	0	0	0	0	183	115	5.9	0.45	1.4	0.237288	3.84	0.650847	130.714	2.74286
2002521824	e754461ca2b91fe8a89576850b04698a	adenocarcinoma	0	0	no	42.4286	0	no	male	82	59	165	21.6713	1	0	0	ICI	Tislelizumab	PD-1	0	0	0	0	0	0	0	0	0	0	0	0	0	0	0	0	0	0	0	0	165	130	5.13	0.86	1.1	0.214425	3.14	0.612086	150	2.85455
2002522117	ee2889572557b13f00ffc2f18e031af4	SCLC	0	0	no	102	0	no	male	62	62	170	21.4533	1	1	0	ICI+chemotherapy	Durvalumab	PD-L1	1	0	1	0	0	0	0	0	0	0	0	0	0	0	0	0	0	0	0	0	138	136	3.06	0.49	0.87	0.284314	1.61	0.526144	158.621	1.85057
2002530274	049610e21b339bb1e330b436b0a96c64	SCC	0	0	no	137.714	0	no	male	66	55	150	24.4444	1	0	0	ICI+chemotherapy	Tislelizumab	PD-1	1	0	1	0	0	0	0	1	0	0	0	0	0	0	0	0	0	0	0	0	189	97	7.27	0.49	1.85	0.25447	4.85	0.667125	102.162	2.62162
2002535799	0ce0883be1a66a9414243a81c8168051	adenocarcinoma	0	0	no	149.429	0	no	male	70	57	170	19.7232	1	0	0	ICI	Camilizumab	PD-1	0	0	0	0	0	0	0	0	0	0	0	0	0	0	0	0	0	0	0	0	226	124	8.38	1.32	2.39	0.285203	4.4	0.52506	94.5607	1.841
2002565019	9d3d22bce0dd01d37766b4685e86b689	adenocarcinoma	0	0	no	108.571	0	no	female	73	64	170	22.1453	0	0	0	ICI+chemotherapy	Pembrolizumab	PD-1	1	1	0	0	0	0	0	0	0	0	0	0	0	0	0	0	0	0	1	0	202	118	7.99	0.53	1.69	0.211514	5.62	0.703379	119.527	3.32544
2002565230	7ace0aaf0e0ae369b15ceeda3d749664	adenocarcinoma	0	0	no	151.286	0	no	female	60	48	166	17.4191	0	0	0	ICI+chemotherapy	Camilizumab	PD-1	1	1	0	0	0	0	0	1	0	0	0	0	0	0	0	0	0	0	0	0	419	118	6.95	0.76	1.98	0.284892	4.04	0.581295	211.616	2.0404
2002576456	7ca9597caca8ac90c051f7a5e43fe7a0	adenocarcinoma	0	0	no	148.714	0	no	female	48	56	164	20.8209	0	0	1	ICI+chemotherapy	Pembrolizumab	PD-1	1	1	0	0	0	0	0	1	0	0	0	0	0	0	0	0	0	0	0	0	350	121	7.06	0.43	0.97	0.137394	5.56	0.787535	360.825	5.73196
2002610331	7f7a4372890e78c2d2bdc85e411b6add	adenocarcinoma	0	0	no	127	0	no	male	51	67	165	24.6097	1	0	0	ICI+chemotherapy	Tislelizumab	PD-1	1	0	1	0	0	0	1	0	0	0	0	0	0	0	0	0	0	0	0	0	198	131	6.99	0.58	2.24	0.320458	3.82	0.546495	88.3929	1.70536
2002613832	f44d155cf53432a8b337d4a70675114c	adenocarcinoma	0	0	no	129.857	0	no	male	82	64	170	22.2837	1	0	0	ICI+chemotherapy+antiangiogenic_therapy	Camilizumab	PD-1	1	1	0	0	0	0	0	0	0	0	0	0	0	1	0	0	1	0	0	0	139	89	6.77	1.29	2.06	0.304284	2.81	0.415066	67.4757	1.36408
2002614152	931d47febf1f2eae5684ddf149613b8e	adenocarcinoma	0	0	no	141.571	0	no	male	70	71	179	22.1591	1	0	0	ICI+chemotherapy+antiangiogenic_therapy	Atezolizumab	PD-L1	1	0	1	0	1	1	0	0	1	0	0	0	0	1	0	1	0	0	0	0	275	135	6.48	0.54	1.38	0.212963	4.43	0.683642	199.275	3.21014
2002630096	5db3826d18e6918a4e0e7fee9723affe	adenocarcinoma	0	0	no	132.571	0	no	female	55	76	159	30.0621	0	0	1	ICI+chemotherapy	Tislelizumab	PD-1	1	0	1	0	0	0	0	0	1	0	0	0	0	0	0	0	0	0	0	0	311	125	6.43	0.42	1.92	0.2986	3.96	0.615863	161.979	2.0625
2002655410	0fe653a0675514f66c00ce146e780b94	sarcomatoid carcinoma	0	0	no	84.7143	0	no	female	40	46	163	17.3134	0	0	0	ICI+chemotherapy+antiangiogenic_therapy	Tislelizumab	PD-1	1	0	0	0	1	0	0	0	0	0	0	0	0	1	0	1	0	0	0	0	261	110	3.25	0.26	1.03	0.316923	1.83	0.563077	253.398	1.7767
2002667553	b57d54b7c3b431aa9b247d57df0accf3	SCC	0	0	no	84.1429	0	no	male	70	72	167	25.8166	1	1	0	ICI+chemotherapy	Pembrolizumab	PD-1	1	0	1	0	0	0	0	1	0	0	0	0	0	0	0	0	0	0	0	0	170	134	5.21	0.39	1.71	0.328215	2.86	0.548944	99.4152	1.67251
2002672489	e926efc45af4752cda7d0bd8db4dc122	SCC	0	0	no	117	0	no	male	73	75	171	25.6489	0	0	0	ICI+chemotherapy	Durvalumab	PD-L1	1	0	1	1	0	0	0	0	0	0	0	0	0	0	0	0	0	0	1	0	238	93	7.06	0.17	0.78	0.110482	5.98	0.847025	305.128	7.66667
2002726912	1759b6da3347677fed1a777ee396f5a9	SCC	0	0	no	115.143	0	no	male	66	60	162	22.8624	1	0	0	ICI+chemotherapy	Sintilimab	PD-1	1	0	1	0	0	0	0	1	0	0	0	0	0	0	0	0	0	0	0	0	342	136	5.5	0.44	1.54	0.28	3.33	0.605455	222.078	2.16234
2002755548	7523abc01731dab902a74f54cb03d269	SCLC	0	0	no	124.571	0	no	male	52	67	165	24.6097	1	0	0	ICI+chemotherapy	Durvalumab	PD-L1	1	0	0	0	1	0	1	0	0	0	0	0	0	0	0	0	0	0	0	0	240	149	8.22	0.65	2.48	0.301703	4.36	0.530414	96.7742	1.75806
2002760376	2505965ef2a6db7dac63d1b2994e605d	adenocarcinoma	0	0	no	126.714	0	no	female	60	52	166	18.8707	0	0	0	ICI+chemotherapy+antiangiogenic_therapy	Pembrolizumab	PD-1	1	1	0	0	0	0	0	1	0	0	0	0	0	1	1	1	0	0	0	0	270	113	4.91	0.37	1.52	0.309572	2.76	0.562118	177.632	1.81579
2002875111	f23ec2b1b0812876625ff5af5a17ca05	SCC	0	0	no	77.7143	0	no	male	61	60	173	20.0474	1	0	0	ICI+chemotherapy	Pembrolizumab	PD-1	1	0	1	0	0	0	0	1	0	0	0	0	0	0	0	0	0	0	0	0	296	137	7.58	0.63	2.97	0.391821	3.81	0.502639	99.6633	1.28283
2002933081	f9736d09a071d9ac08da1ca047a614a3	SCC	0	0	no	80	0	no	male	86	40	155	16.6493	1	1	0	ICI+chemotherapy	Tislelizumab	PD-1	1	0	1	0	0	0	0	0	1	0	0	0	0	0	0	0	0	0	0	0	336	126	6.48	0.8	0.99	0.152778	3.31	0.510802	339.394	3.34343
2002934513	53c853d23b8525591b21625857490478	adenocarcinoma	0	0	no	85.5714	0	no	male	86	64	163	24.0882	1	0	0	ICI+chemotherapy	Sintilimab	PD-1	1	1	0	0	0	0	0	1	0	0	0	0	0	0	0	0	0	0	1	0	251	124	5.97	0.59	1.47	0.246231	3.55	0.59464	170.748	2.41497
2501005952	84b70d4e61f26560f6c9bacc34ab8ca3	SCC	0	0	no	94.2857	0	no	male	66	59	167	21.1553	1	1	1	ICI+chemotherapy	Pembrolizumab	PD-1	1	0	1	0	0	0	0	1	0	0	0	0	0	0	0	0	0	1	1	0	253	137	7.39	0.55	0.73	0.0987821	6.01	0.813261	346.575	8.23288
2501006537	66891ba1599bd842240c2b1b8910e463	adenocarcinoma	0	0	no	130.714	0	no	female	49	45	150	20	0	0	0	ICI+chemotherapy	Tislelizumab	PD-1	1	1	0	0	0	0	0	0	0	0	0	0	0	0	0	0	0	0	0	0	153	136	12.5	0.84	1.93	0.1544	9.72	0.7776	79.2746	5.03627
2501034505	4f2db9a6726ff36333b6c6fb25ba1891	adenocarcinoma	0	0	no	91.2857	0	no	male	54	68	168	23.9158	1	1	0	ICI+chemotherapy+antiangiogenic_therapy	Sintilimab	PD-1	1	0	1	0	0	0	0	0	0	0	0	0	0	1	0	1	0	0	0	0	103	148	7.26	0.42	1.33	0.183196	5.33	0.73416	77.4436	4.00752
2501039153	1c25bce7f91a4796e50cf106f0fd635a	adenocarcinoma	1	1	Arrhythmia	8	1	T-wave Abnormality	male	61	56	165	20.5693	1	0	0	ICI+chemotherapy	Pembrolizumab	PD-1	1	1	0	0	0	0	0	1	1	0	0	0	0	0	0	0	0	0	0	0	272	145	11	1.19	2.7	0.245455	5.85	0.531818	100.741	2.16667
2501086924	8e1d9327ff80d41c2b1f943e699fdcad	sarcomatoid carcinoma	0	0	no	113.286	0	no	male	67	68	170	23.5294	1	0	0	ICI+antiangiogenic_therapy	Tislelizumab	PD-1	0	0	0	0	0	0	0	0	0	0	0	0	0	1	0	1	0	0	0	0	194	143	7.31	0.57	1.66	0.227086	4.59	0.627907	116.867	2.76506
2501106504	2322f991dfea2c632f19f9089c3da7fb	SCC	0	0	no	94.5714	0	no	male	74	57	170	19.7232	1	1	0	ICI+antiangiogenic_therapy	Tislelizumab	PD-1	0	0	0	0	0	0	0	0	0	0	0	0	0	1	0	1	0	0	0	0	139	113	4.93	0.33	0.55	0.111562	3.88	0.787018	252.727	7.05455
2501106529	3d24934df5f4076ade8a39e33ae8122a	adenocarcinoma	0	0	no	163.857	0	no	female	62	62	160	24.2188	0	0	0	ICI+antiangiogenic_therapy	Pembrolizumab	PD-1	0	0	0	0	0	0	0	0	0	0	0	0	0	1	1	0	0	0	0	0	442	137	9.37	0.95	1.54	0.164354	6.83	0.728922	287.013	4.43506
2501109696	7dd1befad9230a8ae05acbde7778a7fc	SCC	0	0	no	43.2857	0	no	male	73	70	168	24.8016	1	0	0	ICI+chemotherapy	Tislelizumab	PD-1	1	0	1	0	0	0	1	0	0	0	0	0	0	0	0	0	0	0	1	0	247	116	7.05	0.83	0.7	0.0992908	5.35	0.758865	352.857	7.64286
2501128845	8798f0003b51a853674a40a72e406b04	NET	1	1	Myocarditis	8	0	no	male	73	54	165	19.8347	1	0	0	ICI	Durvalumab	PD-L1	0	0	0	0	0	0	0	0	0	0	0	0	0	0	0	0	0	0	0	0	235	116	5.17	0.53	1.27	0.245648	3.03	0.586074	185.039	2.38583
2501136490	d10797799e5528322e862f19ecc4e2c0	adenocarcinoma	1	1	Pericarditis	8	0	no	male	63	65	172	21.9713	1	1	0	ICI+chemotherapy	Pembrolizumab	PD-1	1	0	1	0	0	0	0	0	0	0	0	0	0	0	0	0	0	0	0	0	243	155	9.96	0.76	1.64	0.164659	6.85	0.687751	148.171	4.17683
2501166182	c1a000d9bbe2d5e051e235bac94f2bc3	adenocarcinoma	0	0	no	191.429	0	no	male	66	75	179	23.4075	0	0	0	ICI+chemotherapy	Sintilimab	PD-1	1	0	0	0	0	0	0	0	1	0	0	0	0	0	0	0	0	0	0	0	323	142	5.48	0.32	0.87	0.158759	4.18	0.762774	371.264	4.8046
2501235551	dc6207a694e9d680d5b2b9c9cba0cb25	adenocarcinoma	0	0	no	225.286	0	no	male	55	57	166	20.6852	1	1	0	ICI	Sintilimab	PD-1	0	0	0	0	0	0	0	0	0	0	0	0	0	0	0	0	0	0	0	0	237	108	4.4	0.45	0.54	0.122727	3.27	0.743182	438.889	6.05556
2501288631	8492035133bd42ffe82f5c5b3d17ce98	SCC	0	0	no	130.571	0	no	male	66	40	158	16.0231	1	1	0	ICI	Durvalumab	PD-L1	0	0	0	0	0	0	0	0	0	0	0	0	0	0	0	0	0	0	0	0	328	96	6.83	0.35	1.3	0.190337	5.05	0.739385	252.308	3.88462
2501292189	bbed49eb47dfe159e050be0357d65c39	adenocarcinoma	0	0	no	181.714	0	no	male	55	60	172	20.2812	1	0	0	ICI+antiangiogenic_therapy	Sintilimab	PD-1	0	0	0	0	0	0	0	0	0	0	0	0	0	1	1	0	0	0	0	0	285	109	11.2	1.54	0.99	0.0883929	7.59	0.677679	287.879	7.66667
2501299087	9d2a7443d6be322b451e4b0d1fdb1cc3	adenocarcinoma	0	0	no	272.857	0	no	male	60	60	149	27.0258	1	0	0	ICI	Pembrolizumab	PD-1	0	0	0	0	0	0	0	0	0	0	0	0	0	0	0	0	0	0	0	0	193	139	6.78	0.63	1.12	0.165192	4.84	0.713864	172.321	4.32143
2501301679	518eda87e37f72ed94d9266f3d5df8fe	adenocarcinoma	0	0	no	184.429	0	no	female	44	67	175	21.8776	0	0	1	ICI+chemotherapy+antiangiogenic_therapy	Camilizumab	PD-1	1	1	0	0	0	0	0	1	0	0	0	0	0	1	1	0	0	0	0	0	173	119	5.56	0.58	1.57	0.282374	3.32	0.597122	110.191	2.11465
2501340646	05804e0b3f4d428a915a9f736653d56c	adenocarcinoma	0	0	no	121.857	0	no	male	65	76	170	26.2976	1	0	0	ICI+chemotherapy+antiangiogenic_therapy	Sintilimab	PD-1	1	1	1	0	0	0	0	0	0	0	0	0	0	1	1	1	0	1	0	0	220	106	4.01	0.59	1.25	0.311721	2.03	0.506234	176	1.624
2501359517	26ad8ee1e2a0c93c66ec232dde08568d	adenocarcinoma	0	0	no	261	0	no	male	72	47	161	18.132	1	1	0	ICI+chemotherapy	Pembrolizumab	PD-1	1	1	0	0	0	0	1	0	0	0	0	0	0	0	0	0	0	0	0	0	171	92	3.35	0.33	0.63	0.18806	2.28	0.680597	271.429	3.61905
2501397129	d9ad975786def7a642861c0e79c92eed	adenocarcinoma	0	0	no	71.8571	0	no	male	46	60	165	22.0386	1	1	0	ICI+chemotherapy+antiangiogenic_therapy	Sintilimab	PD-1	1	1	0	0	0	0	0	1	0	0	0	0	0	1	1	0	0	0	0	0	267	128	4.2	0.3	1.61	0.383333	2.17	0.516667	165.839	1.34783
2501496978	5f3d5fb2431a4061ce653ea315151400	SCC	0	0	no	222	0	no	male	60	50	167	17.9282	0	0	0	ICI+chemotherapy+antiangiogenic_therapy	Sintilimab	PD-1	1	0	1	0	0	0	0	0	0	0	0	0	0	1	0	1	0	0	0	0	174	141	6.78	0.38	0.89	0.131268	5.25	0.774336	195.506	5.89888
2501498860	b9f74f2018e1526a8e301b2972efb0b9	adenocarcinoma	0	0	no	123.571	0	no	female	50	45	158	18.026	0	0	0	ICI+chemotherapy	Pembrolizumab	PD-1	1	1	0	0	0	0	0	1	0	0	0	0	0	0	0	0	0	0	0	0	220	103	5.24	0.37	0.59	0.112595	3.9	0.744275	372.881	6.61017
2501501238	a7ee565e71ca854491c4c98ace02dde4	SCC	0	0	no	219	0	no	male	58	70	170	24.2215	1	0	1	ICI+chemotherapy+antiangiogenic_therapy	Pembrolizumab	PD-1	1	1	0	1	0	0	0	1	0	0	0	0	0	1	1	1	0	0	0	0	106	130	6.32	0.61	2.24	0.35443	3.18	0.503165	47.3214	1.41964
2501511867	67d12d7caac59a783c899e44da88a928	adenocarcinoma	0	0	no	230.143	0	no	male	69	55	164	20.4491	1	1	0	ICI+chemotherapy	Pembrolizumab	PD-1	1	1	0	0	0	0	0	0	0	0	0	0	0	0	0	0	0	0	0	0	538	110	9.57	0.73	1.38	0.144201	7.33	0.765935	389.855	5.31159
2501523033	4081d37eace66af7f03df7099b96b718	adenocarcinoma	0	0	no	119.143	0	no	male	67	79	165	29.0174	1	1	0	ICI+chemotherapy	Durvalumab	PD-L1	1	0	0	0	1	0	0	1	0	0	0	0	0	0	0	0	0	0	0	0	202	155	4.93	0.34	2.15	0.436105	2.27	0.460446	93.9535	1.05581
2501529938	88fa95bbaceaeab99e629c382be88ba7	adenocarcinoma	0	0	no	236.286	0	no	female	74	56	173	18.7109	0	0	0	ICI+chemotherapy	Sintilimab	PD-1	1	0	1	0	0	0	0	0	0	0	0	0	0	0	0	0	0	0	0	0	322	108	8.35	0.96	1.24	0.148503	5.69	0.681437	259.677	4.58871
2501530418	8ff597a9c0f4e5db9949817a3e6954b7	adenocarcinoma	0	0	no	82.8571	0	no	male	60	83	176	26.6981	1	1	0	ICI+chemotherapy+antiangiogenic_therapy	Tislelizumab	PD-1	1	1	0	0	0	0	0	0	1	0	0	0	0	1	1	0	0	1	0	0	187	143	7.47	0.43	1.21	0.161981	5.42	0.725569	154.545	4.47934
2501533242	71618097f9ec7f099663fc492531cb12	adenocarcinoma	0	0	no	259.429	0	no	female	66	48	153	20.5049	0	0	0	ICI+chemotherapy	Sintilimab	PD-1	1	1	0	0	0	0	0	1	0	0	0	0	0	0	0	0	0	0	0	0	154	122	3.25	0.39	0.95	0.292308	1.86	0.572308	162.105	1.95789
2501540309	49e50392473f2401302eb4a7d32f8be9	adenocarcinoma	0	0	no	235	0	no	male	70	61	165	22.4059	1	1	1	ICI+chemotherapy	Pembrolizumab	PD-1	1	0	1	0	0	0	0	1	0	0	0	0	0	0	0	0	0	0	0	0	260	152	6.15	0.51	1.11	0.180488	4.34	0.705691	234.234	3.90991
2501550394	ab6c54cf7fac42ffdabe48599e91c317	adenocarcinoma	0	0	no	229.714	0	no	male	56	68	169	23.8087	1	1	0	ICI+chemotherapy	Pembrolizumab	PD-1	1	1	0	0	0	0	0	1	0	0	0	0	0	0	0	0	0	0	0	0	692	137	15.52	1.55	3.21	0.20683	10.64	0.685567	215.576	3.31464
2501556208	b53c4c621488714873ae5e1309e638f5	SCLC	0	0	no	180.714	0	no	male	63	75	168	26.5731	0	0	0	ICI+chemotherapy+antiangiogenic_therapy	Tislelizumab	PD-1	1	0	0	0	0	1	0	0	0	0	0	0	0	1	1	0	0	0	0	0	171	116	4.17	0.36	1.27	0.304556	2.4	0.57554	134.646	1.88976
2501556906	f7fbc20971930a9074985af5596e0c44	adenocarcinoma	0	0	no	184.714	0	no	male	70	67	168	23.7387	1	1	0	ICI	Sintilimab	PD-1	0	0	0	0	0	0	0	0	0	0	0	0	0	0	0	0	0	0	0	0	230	123	6.34	0.67	1.12	0.176656	4.47	0.705047	205.357	3.99107
2501581607	3f74f4d1e837c35ecc239388855de284	adenocarcinoma	0	0	no	194.286	0	no	female	72	47	155	19.563	0	0	0	ICI+chemotherapy	Sintilimab	PD-1	1	1	0	0	0	0	0	0	0	0	0	0	0	0	0	0	0	0	0	0	319	81	3.36	0.53	1.07	0.318452	1.67	0.497024	298.131	1.56075
2501582259	82d2e4b34131b38b43e94a71a6745e0a	adenocarcinoma	0	0	no	90.7143	0	no	male	56	70	160	27.3438	0	0	0	ICI+chemotherapy	Pembrolizumab	PD-1	1	1	0	0	0	0	1	0	0	0	0	0	0	0	0	0	0	0	0	0	179	141	6.28	0.6	0.87	0.138535	4.62	0.735669	205.747	5.31034
2501582497	92398665f4a4b9c94b216f812608be08	adenocarcinoma	0	0	no	184.286	0	no	male	67	78	175	25.4694	1	0	0	ICI	Durvalumab	PD-L1	0	0	0	0	0	0	0	0	0	0	0	0	0	0	0	0	0	0	0	0	201	132	7.78	0.62	2.48	0.318766	4.59	0.589974	81.0484	1.85081
2501588488	c1ca017842ad04b34b6ae4490cefefa5	adenocarcinoma	0	0	no	213.714	0	no	female	53	61	156	25.0657	0	0	0	ICI+chemotherapy	Toripalimab	PD-1	1	1	0	0	0	0	0	1	0	0	0	0	0	0	0	0	0	0	0	0	163	123	3.04	0.32	0.46	0.151316	2.18	0.717105	354.348	4.73913
2501590951	bd99b811a91a5a30bf5056fee2312871	adenocarcinoma	0	0	no	134.143	0	no	male	68	63	170	21.7993	1	1	0	ICI+chemotherapy+antiangiogenic_therapy	Pembrolizumab	PD-1	1	1	0	0	0	0	0	1	0	0	0	0	0	1	0	1	0	0	0	0	141	121	4.61	0.34	1.48	0.321041	2.68	0.581345	95.2703	1.81081
2501600519	aa3267ba27dc2720a72422faa489aee9	SCC	0	0	no	196.571	0	no	male	64	71	177	22.6627	1	0	0	ICI+chemotherapy	Sintilimab	PD-1	1	0	1	0	0	0	0	1	0	0	0	0	0	0	0	0	0	0	0	0	303	128	2.99	0.12	0.67	0.22408	1.98	0.662207	452.239	2.95522
2501608062	c1822d7fe8b6adbd161462c989b6152e	adenocarcinoma	0	0	no	194.143	0	no	male	74	70	177	22.3435	1	1	0	ICI+chemotherapy	Pembrolizumab	PD-1	1	0	1	0	0	0	0	0	0	0	0	0	0	0	0	0	0	0	0	0	172	147	8.64	0.56	1.26	0.145833	6.65	0.769676	136.508	5.27778
2501726238	787f465d0eab80fa962fafe10a24e62f	adenocarcinoma	1	1	Arrhythmia	7	1	First-Degree Atrioventricular Block (First-Degree AV Block)	male	78	58	168	20.5499	0	0	0	ICI+antiangiogenic_therapy	Camilizumab	PD-1	0	0	0	0	0	0	0	0	0	0	0	0	0	1	0	1	0	0	0	0	236	81	6.69	0.75	1.12	0.167414	4.75	0.710015	210.714	4.24107
2501733254	96ff311bef5bd5684d5f24acf4e99af9	adenocarcinoma	0	0	no	168.857	0	no	male	69	73	168	25.8645	0	0	0	ICI+chemotherapy	Camilizumab	PD-1	1	0	1	0	0	0	0	0	1	0	0	0	0	0	0	0	0	0	0	0	189	135	8.54	0.44	1.24	0.145199	6.81	0.797424	152.419	5.49194
2501734180	373cbe6a2c7ba766d8adc7be37711743	adenocarcinoma	0	0	no	215.714	0	no	male	82	52	166	18.8707	0	0	0	ICI+chemotherapy	Pembrolizumab	PD-1	1	0	1	1	0	0	0	0	0	0	0	0	0	0	0	0	0	0	0	0	338	136	6.28	0.56	1.6	0.254777	4.03	0.64172	211.25	2.51875
2501735647	9fe9fc1e7e1cc66c2e358b22a7731c9c	adenocarcinoma	0	0	no	101.429	0	no	male	67	75	159	29.6665	1	1	0	ICI+chemotherapy	Tislelizumab	PD-1	1	1	0	0	0	0	1	0	0	0	0	0	0	0	0	0	0	0	0	0	234	136	6.65	0.71	1.15	0.172932	4.59	0.690226	203.478	3.9913
2501742107	e8bd06b2407d2cdf4f0a30ca98ac07da	SCLC	0	0	no	61.1429	0	no	male	53	58	158	23.2335	0	0	0	ICI+chemotherapy+antiangiogenic_therapy	Tislelizumab	PD-1	1	0	1	0	0	0	0	0	0	0	0	0	0	1	0	1	0	0	0	0	134	129	2	0.15	0.41	0.205	1.43	0.715	326.829	3.4878
2501742691	f23dd07c3676f555b7c764a41db1edb1	adenocarcinoma	0	0	no	174.429	0	no	male	80	64	161	24.6904	1	0	0	ICI+antiangiogenic_therapy	Pembrolizumab	PD-1	0	0	0	0	0	0	0	0	0	0	0	0	0	1	0	1	0	1	1	0	182	115	7.18	0.76	0.91	0.126741	5	0.696379	200	5.49451
2501744161	8e0a245076f1a7c593fedb35cd3ff5f5	adenocarcinoma	0	0	no	157.857	0	no	male	74	55	160	21.4844	1	0	0	ICI	Camilizumab	PD-1	0	0	0	0	0	0	0	0	0	0	0	0	0	0	0	0	0	0	0	0	319	112	5.76	0.67	1.48	0.256944	3.52	0.611111	215.541	2.37838
2501764340	6bdb6eeb5088bc41de92dea205fdbda8	adenocarcinoma	0	0	no	103	0	no	male	58	65	168	23.03	0	0	0	ICI+chemotherapy	Pembrolizumab	PD-1	1	1	0	0	0	0	0	0	0	0	0	0	0	0	0	0	0	0	0	0	172	152	6.27	0.4	1.35	0.215311	4.49	0.716108	127.407	3.32593
2501764924	73dc49a61bafe254bf97027688fb1d9a	SCC	0	0	no	180.857	0	no	male	56	67	179	20.9107	0	0	0	ICI+chemotherapy	Sintilimab	PD-1	1	0	1	0	0	0	0	1	0	0	0	0	0	0	0	0	0	0	0	0	370	115	13.53	0.85	2.48	0.183296	10.18	0.752402	149.194	4.10484
2501770793	be1e6dc1aac2f8d842cfae34e5764703	adenocarcinoma	0	0	no	94.7143	0	no	female	47	68	158	27.2392	0	0	0	ICI+chemotherapy+antiangiogenic_therapy+targeted_therapy	Tislelizumab	PD-1	1	0	1	0	0	0	0	1	0	1	1	0	0	1	1	1	0	0	0	0	313	123	4.01	0.3	1.36	0.339152	2.27	0.566085	230.147	1.66912
2501777671	83154bd02dbc0eecc4c622765a4714b2	SCC	0	0	no	165.286	0	no	male	48	65	167	23.3067	1	1	0	ICI+chemotherapy	Tislelizumab	PD-1	1	0	1	1	0	0	0	1	0	0	0	0	0	0	0	0	0	0	0	0	278	105	5.09	0.08	1.25	0.24558	3.68	0.722986	222.4	2.944
2501779097	1de590f6a481c30cf1b479bbb6f37d3f	adenocarcinoma	0	0	no	164.429	0	no	male	61	58	164	21.5645	0	0	0	ICI+chemotherapy+antiangiogenic_therapy	Pembrolizumab	PD-1	1	1	0	0	0	0	0	1	0	0	0	0	0	1	1	1	0	0	1	0	868	93	11.94	1.19	1.49	0.124791	9.13	0.764657	582.55	6.12752
2501781094	020abb367929ddea5ac03986b57ef9d5	SCLC	0	0	no	173	0	no	male	69	54	161	20.8325	1	0	0	ICI+chemotherapy	Tislelizumab	PD-1	1	1	0	0	0	0	0	1	0	0	0	0	0	0	0	0	0	0	0	0	185	107	8.18	0.77	1.53	0.187042	5.45	0.666259	120.915	3.56209
2501786347	750a6be1d7c41b593f7b9297ea1e2b19	SCLC	0	0	no	144.857	0	no	male	61	76	173	25.3934	0	0	0	ICI+chemotherapy	Toripalimab	PD-1	1	1	1	0	0	0	0	0	1	0	0	0	0	0	0	0	0	0	0	0	157	110	3.72	0.35	0.49	0.13172	2.63	0.706989	320.408	5.36735
2501791113	8d8e177a4c513eddbdc402bf3d40cdd5	adenocarcinoma	0	0	no	159.429	0	no	male	65	68	168	24.093	1	1	0	ICI+chemotherapy	Pembrolizumab	PD-1	1	1	0	0	0	0	0	0	0	0	0	0	0	0	0	0	0	0	0	0	269	112	4.24	0.71	1.23	0.290094	2.24	0.528302	218.699	1.82114
2501801388	978f6619630150c8e556059fc4cd7e63	adenocarcinoma	0	0	no	194.286	0	no	female	60	69	165	25.3444	0	0	0	ICI+chemotherapy	Tislelizumab	PD-1	1	1	0	0	0	0	0	0	0	0	0	0	0	0	0	0	0	0	0	0	297	156	7.43	0.68	1.04	0.139973	5.52	0.742934	285.577	5.30769
2501807545	3ac03c2099d35af03f2c480a91a435d1	SCC	0	0	no	192.571	0	no	female	44	60	175	19.5918	0	0	0	ICI+chemotherapy	Toripalimab	PD-1	1	0	0	1	0	0	0	1	0	0	0	0	0	0	0	0	0	0	0	0	162	113	3.7	0.21	1.28	0.345946	2.12	0.572973	126.562	1.65625
2501816076	6c4057a6410ddaaedd556606bbd2c7c0	SCC	0	0	no	186.286	0	no	male	70	64	174	21.1389	1	1	0	ICI+chemotherapy	Tislelizumab	PD-1	1	0	1	0	0	0	0	0	1	0	0	0	0	0	0	0	0	0	0	0	496	139	9.64	0.9	2.05	0.212656	6.31	0.654564	241.951	3.07805
2501830650	0a6cecfbe951aff7c517904b92c21335	SCC	1	1	Arrhythmia	7	1	Left Anterior Fascicular Block (LAFB)	male	61	67	172	22.6474	1	0	0	ICI+chemotherapy	Durvalumab	PD-L1	1	0	0	0	1	0	0	1	0	0	0	0	0	0	0	0	0	0	0	0	522	79	6.88	0.64	0.92	0.133721	5.19	0.75436	567.391	5.6413
2501831697	e7fa50cafc36c28154f4fcf7313bd570	SCC	0	0	no	134.571	0	no	male	54	45	160	17.5781	0	0	0	ICI+chemotherapy	Tislelizumab	PD-1	1	0	0	1	0	0	1	0	0	0	0	0	0	0	0	0	0	0	1	0	277	108	6.78	0.57	1.55	0.228614	4.38	0.646018	178.71	2.82581
2501833663	c95bca5449f667f8d35c340f2a9e2a24	SCLC	0	0	no	31.4286	0	no	female	54	59	160	23.0469	0	0	0	ICI+antiangiogenic_therapy	Durvalumab	PD-L1	0	0	0	0	0	0	0	0	0	0	0	0	0	1	0	1	0	0	1	0	114	101	1.89	0.24	0.44	0.232804	1.19	0.62963	259.091	2.70455
2501837170	538b2e08f6689888d40e42d621f7014a	adenocarcinoma	0	0	no	134.286	0	no	male	71	57	165	20.9366	0	0	0	ICI+chemotherapy	Tislelizumab	PD-1	1	0	0	1	0	0	0	1	0	0	0	0	0	0	0	0	0	0	0	0	242	108	6.34	0.48	0.88	0.138801	4.73	0.746057	275	5.375
2501839205	83f094b3fa7d139f401b480059119b9b	adenocarcinoma	0	0	no	146.429	0	no	male	67	72	179	22.4712	1	1	0	ICI	Durvalumab	PD-L1	0	0	0	0	0	0	0	0	0	0	0	0	0	0	0	0	0	0	0	0	112	121	4.02	0.41	0.87	0.216418	2.44	0.606965	128.736	2.8046
2501840375	34e73e8aeea8e22145163afb3f843f6e	SCC	0	0	no	185.571	0	no	male	81	62	168	21.9671	1	1	0	ICI+chemotherapy	Sintilimab	PD-1	1	0	0	0	1	0	0	0	0	0	0	0	0	0	0	0	0	0	0	0	244	114	6.33	0.47	1.23	0.194313	4.53	0.71564	198.374	3.68293
2501846512	cb1308e13f6b9cecabb79e6437ac481f	adenocarcinoma	0	0	no	165.714	0	no	male	63	60	167	21.5139	1	1	0	ICI	Tislelizumab	PD-1	0	0	0	0	0	0	0	0	0	0	0	0	0	0	0	0	0	0	0	0	222	88	7.34	1.16	0.89	0.121253	4.75	0.647139	249.438	5.33708
2501857840	8c1a7372674aaffda1833c5197ab0da3	adenocarcinoma	0	0	no	154.857	0	no	female	71	49	163	18.4425	0	0	0	ICI+chemotherapy+antiangiogenic_therapy	Toripalimab	PD-1	1	0	0	0	0	0	1	0	0	0	0	0	0	1	0	1	0	0	0	0	134	134	4.37	0.32	1.49	0.340961	2.42	0.553776	89.9329	1.62416
2501857920	f266b9df021f6f24b90ed7c752c524ab	sarcomatoid carcinoma	1	1	Myocarditis	14	0	no	male	66	69	170	23.8754	1	1	0	ICI+chemotherapy	Pembrolizumab	PD-1	1	0	1	0	0	0	0	0	1	0	0	0	0	0	0	0	0	0	0	0	461	121	9.33	0.21	1.43	0.153269	7.67	0.822079	322.378	5.36364
2501857977	8f2cf34abfa9362e366cebf926221a98	sarcomatoid carcinoma	0	0	no	162	0	no	female	77	47	162	17.9089	0	0	0	ICI	Tislelizumab	PD-1	0	0	0	0	0	0	0	0	0	0	0	0	0	0	0	0	0	0	0	0	146	109	4.84	0.39	1.41	0.291322	2.96	0.61157	103.546	2.09929
2501859696	7996fc7608a6d11fa0450cf2ec3515a2	sarcomatoid carcinoma	0	0	no	114	0	no	male	58	60	160	23.4375	1	0	0	ICI+chemotherapy+antiangiogenic_therapy	Camilizumab	PD-1	1	0	1	0	0	0	0	0	0	0	0	0	0	1	0	0	1	0	0	0	245	107	14.15	0.24	0.6	0.0424028	13.23	0.934982	408.333	22.05
2501861425	fd67017fd239dcbb9fc0f598e346c5b0	adenocarcinoma	0	0	no	183	0	no	male	66	58	158	23.2335	1	0	1	ICI+antiangiogenic_therapy	Pembrolizumab	PD-1	0	0	0	0	0	0	0	0	0	0	0	0	0	1	1	1	0	0	0	0	259	81	10.92	1.04	1.43	0.130952	8.41	0.770147	181.119	5.88112
2501861492	5aec0a29d4aad32d4ed8c325ab349a25	adenocarcinoma	0	0	no	182	0	no	male	79	89	180	27.4691	0	0	0	ICI+chemotherapy+antiangiogenic_therapy	Pembrolizumab	PD-1	1	1	0	0	0	0	0	1	0	0	0	0	0	1	1	0	0	0	0	0	174	153	4.72	0.38	1.41	0.298729	2.84	0.601695	123.404	2.01418
2501868265	3a2df4cfa8d5ed60ff8ef382f7b46156	adenocarcinoma	0	0	no	137.714	0	no	male	64	78	175	25.4694	1	1	0	ICI	Camilizumab	PD-1	0	0	0	0	0	0	0	0	0	0	0	0	0	0	0	0	0	0	0	0	205	144	6.26	0.56	2.07	0.330671	3.53	0.563898	99.0338	1.70531
2501869870	5b67e70621e680e4146c63f8d8496b0d	adenocarcinoma	0	0	no	188.857	0	no	male	77	53	160	20.7031	0	0	0	ICI	Tislelizumab	PD-1	0	0	0	0	0	0	0	0	0	0	0	0	0	0	0	0	0	1	1	0	304	106	3.62	0.57	0.83	0.229282	2.14	0.59116	366.265	2.57831
2501873879	fd73e81c48e77629c6dbbcc8dfe2303b	NET	0	0	no	155.714	0	no	male	70	74	171	25.3069	1	1	0	ICI+chemotherapy	Sintilimab	PD-1	1	0	0	0	1	0	0	0	1	0	0	0	0	0	0	0	0	1	0	0	336	94	11.06	0.78	1.05	0.0949367	8.87	0.801989	320	8.44762
2501890480	2161469111f13834b541424d193e3198	SCC	0	0	no	172.714	0	no	male	72	68	169	23.8087	1	1	0	ICI+chemotherapy	Camilizumab	PD-1	1	0	1	0	0	0	0	0	0	0	0	0	0	0	0	0	0	0	1	0	246	102	7.56	0.79	0.96	0.126984	5.61	0.742063	256.25	5.84375
2501899027	8a4e8827b1a189f4acf89274f52c230e	adenocarcinoma	0	0	no	120.714	0	no	male	73	51	167	18.2868	0	0	0	ICI	Durvalumab	PD-L1	0	0	0	0	0	0	0	0	0	0	0	0	0	0	0	0	0	0	0	0	97	95	5.86	0.66	0.6	0.102389	4.03	0.687713	161.667	6.71667
2501902386	528a3a117631a76baef9c5629d79779d	adenocarcinoma	0	0	no	160	0	no	male	70	63	167	22.5896	1	0	0	ICI+chemotherapy+antiangiogenic_therapy	Pembrolizumab	PD-1	1	1	1	0	0	0	0	0	0	0	0	0	0	1	0	1	0	0	0	0	212	125	8.86	0.87	1.62	0.182844	6.02	0.679458	130.864	3.71605
2501909137	e4a1db363698dae4765edf610710843c	SCC	0	0	no	155.429	0	no	male	68	68	170	23.5294	0	0	1	ICI+chemotherapy	Pembrolizumab	PD-1	1	1	0	0	0	0	0	1	1	0	0	0	0	0	0	0	0	0	0	0	325	124	12.62	1.48	1.57	0.124406	9.36	0.74168	207.006	5.96178
2501910695	3cdc27d644d97655e98fb2784728b1e4	adenocarcinoma	1	1	Arrhythmia	6	1	T-wave Abnormality	male	61	72	170	24.9135	1	1	0	ICI+chemotherapy	Pembrolizumab	PD-1	1	1	0	0	0	0	0	1	0	0	0	0	0	0	0	0	0	0	0	0	331	100	5.75	0.95	1.17	0.203478	3.52	0.612174	282.906	3.00855
2501911782	081c18a5be31ec98a955834f9573f62b	SCC	0	0	no	165.571	0	no	male	39	57	159	22.5466	0	0	0	ICI+chemotherapy+antiangiogenic_therapy	Camilizumab	PD-1	1	0	1	1	0	0	0	1	0	0	0	0	0	1	0	0	1	0	0	0	248	133	17.23	1.61	2.56	0.148578	12.57	0.729541	96.875	4.91016
2501912411	73f854c314d67f8896b90210f63ca15b	adenocarcinoma	0	0	no	93.4286	0	no	male	48	60	166	21.7738	0	0	0	ICI+chemotherapy+antiangiogenic_therapy	Sintilimab	PD-1	1	1	1	0	0	0	1	0	1	0	0	0	0	1	1	0	0	0	0	0	341	137	11.2	1.3	0.81	0.0723214	8.28	0.739286	420.988	10.2222
2501918315	95f0ca41e51d5bf495185962c50ff460	SCC	1	1	Arrhythmia	12	1	Right Bundle Branch Block (RBBB)	male	79	45	168	15.9439	0	0	0	ICI	Camilizumab	PD-1	0	0	0	0	0	0	0	0	0	0	0	0	0	0	0	0	0	0	0	0	181	143	5.64	0.45	2.25	0.398936	2.73	0.484043	80.4444	1.21333
2501930284	0e8712018fd66813306093f9541ecce6	SCC	0	0	no	166.286	0	no	male	73	70	177	22.3435	0	0	0	ICI+chemotherapy	Pembrolizumab	PD-1	1	0	1	0	0	0	0	0	0	0	0	0	0	0	0	0	0	0	0	0	192	122	3.77	0.37	0.75	0.198939	2.51	0.665782	256	3.34667
2501939004	5f0aca64670c9c0e5877e21be7ef2f5c	SCC	0	0	no	103.429	0	no	female	59	52	160	20.3125	0	0	0	ICI+chemotherapy+antiangiogenic_therapy	Sintilimab	PD-1	1	1	0	0	0	0	0	1	0	0	0	0	0	1	1	0	0	0	0	0	170	123	4.12	0.32	1.48	0.359223	2.23	0.541262	114.865	1.50676
2501943024	64d750b9d2438ef2236edcfdf05e2ff7	SCC	0	0	no	162.714	0	no	male	67	57	172	19.2672	1	0	0	ICI+chemotherapy	Pembrolizumab	PD-1	1	0	1	0	0	0	0	1	0	0	0	0	0	0	0	0	0	0	0	0	672	104	6.21	0.89	0.88	0.141707	4.01	0.645733	763.636	4.55682
2501947690	e934407cbbea38a00d0999b2c4efac4a	adenocarcinoma	0	0	no	109.286	0	no	male	68	64	169	22.4082	1	1	0	ICI+antiangiogenic_therapy	Sintilimab	PD-1	0	0	0	0	0	0	0	0	0	0	0	0	0	1	0	1	0	0	0	0	264	108	6.11	0.52	1.55	0.253682	3.8	0.621931	170.323	2.45161
2501950634	cd42e07b9a7103cfd36f6ad7a9fbd477	adenocarcinoma	0	0	no	47.4286	0	no	male	66	53	167	19.0039	1	1	0	ICI+chemotherapy	Tislelizumab	PD-1	1	0	0	0	0	0	0	1	0	0	0	0	0	0	0	0	0	0	0	0	149	135	6.67	0.48	0.81	0.121439	5.29	0.793103	183.951	6.53086
2501953898	f21025c44667b95a207e0d660c5cde45	adenocarcinoma	0	0	no	154	0	no	male	67	71	172	23.9995	0	0	1	ICI+chemotherapy	Tislelizumab	PD-1	1	1	0	0	0	0	0	0	0	0	0	0	0	0	0	0	0	0	0	0	187	115	7.3	0.5	1.77	0.242466	4.98	0.682192	105.65	2.81356
2501958354	ac6199cbefc43e4ac0f1fdaf1963a94d	SCC	0	0	no	86.4286	0	no	male	60	65	172	21.9713	1	1	0	ICI+chemotherapy	Tislelizumab	PD-1	1	1	0	0	0	0	0	0	0	0	0	0	0	0	0	0	0	0	0	0	324	162	8.3	0.44	2.56	0.308434	5.08	0.612048	126.562	1.98438
2501964564	ef6ffc62b5f444fff242f4d2617a5118	SCLC	0	0	no	164.286	0	no	male	73	63	170	21.7993	1	1	0	ICI+chemotherapy	Durvalumab	PD-L1	1	0	0	0	1	0	0	1	0	0	0	0	0	0	0	0	0	0	0	0	358	120	7.81	0.73	1.15	0.147247	5.65	0.723431	311.304	4.91304
2501968751	6ff87f2bf1a6b6a947a427b8c8153e7b	adenocarcinoma	0	0	no	84.7143	0	no	male	66	51	165	18.5491	1	0	0	ICI+antiangiogenic_therapy	Pembrolizumab	PD-1	0	0	0	0	0	0	0	0	0	0	0	0	0	1	1	1	0	0	0	0	204	115	3.62	0.33	0.86	0.237569	2.87	0.792818	237.209	3.33721
2501976323	bbfaf3ce4d75038f062c2e0b0e5d118e	NET	0	0	no	93.8571	0	no	male	78	65	159	25.711	1	1	0	ICI+chemotherapy	Pembrolizumab	PD-1	1	0	1	0	0	0	0	0	0	0	0	0	0	0	0	0	0	0	0	0	313	131	7.98	0.41	1.19	0.149123	6.21	0.778195	263.025	5.21849
2501977385	d8bc00d1eb4cdcbc897dae0441c88bd1	NET	0	0	no	139.857	0	no	male	80	58	164	21.5645	1	0	0	ICI+chemotherapy+antiangiogenic_therapy	Pembrolizumab	PD-1	1	1	0	0	0	0	1	0	0	0	0	0	0	1	1	0	0	1	1	0	248	137	11.59	1.44	2.2	0.189819	7.63	0.658326	112.727	3.46818
2501984168	29675be0fdfcd6b11eb62779c67c5f8e	adenocarcinoma	0	0	no	87	0	no	male	69	74	168	26.3605	0	1	0	ICI+chemotherapy	Pembrolizumab	PD-1	1	0	0	0	0	0	0	1	0	0	0	0	0	0	0	0	0	0	0	0	168	144	5.73	0.49	1.87	0.326353	3.27	0.570681	89.8396	1.74866
2501986219	2d7bb3cff005b4180c601849fb6a993e	SCLC	0	0	no	146.286	0	no	male	55	87	174	28.7356	0	0	1	ICI+chemotherapy	Durvalumab	PD-L1	1	0	0	0	1	0	0	0	0	0	0	0	0	0	0	0	0	0	0	0	221	141	7.97	0.82	1.41	0.176913	5.56	0.697616	156.738	3.94326
2501988286	04136847e34fe19dc88bc8f8dc775932	adenocarcinoma	0	0	no	96.4286	0	no	male	68	57	170	19.7232	1	1	0	ICI	Tislelizumab	PD-1	0	0	0	0	0	0	0	0	0	0	0	0	0	0	0	0	0	0	0	0	176	125	5.05	0.39	2.12	0.419802	2.35	0.465347	83.0189	1.10849
2501993783	7f3ac157f51ce48a22804d000bad56f9	adenocarcinoma	0	0	no	135.714	0	no	male	54	69	165	25.1607	1	1	0	ICI	Durvalumab	PD-L1	0	0	0	0	0	0	0	0	0	0	0	0	0	0	0	0	0	0	0	0	296	142	4.76	0.31	1.12	0.235294	3.05	0.640756	264.286	2.72321
2501995766	1053ca63d513bb80e5bf8236f9799928	adenocarcinoma	0	0	no	33.5714	0	no	male	72	65	165	23.8751	1	1	0	ICI+chemotherapy	Tislelizumab	PD-1	1	0	1	0	0	0	0	1	0	0	0	0	0	0	0	0	0	0	1	1	297	98	9.77	0.36	0.85	0.087001	8.22	0.841351	349.412	9.67059
2502002599	ba4ff253d4574073d1d8c302ebb9f44c	adenocarcinoma	0	0	no	134.429	0	no	male	54	72	169	25.0692	0	0	0	ICI+chemotherapy+antiangiogenic_therapy	Sintilimab	PD-1	1	0	0	1	0	0	1	0	0	0	0	0	0	1	0	0	1	0	0	0	361	124	9.86	0.67	1.47	0.149087	7.43	0.75355	245.578	5.05442
2502005987	500782e2561f97b458b336a03a0b9f69	adenocarcinoma	0	0	no	131.429	0	no	male	60	71	168	25.1559	0	0	0	ICI+chemotherapy	Pembrolizumab	PD-1	1	1	0	0	0	0	0	0	0	0	0	0	0	0	0	0	0	0	0	0	291	71	12.99	0.89	0.66	0.0508083	11.28	0.86836	440.909	17.0909
2502009175	be69b6a95aabf76289294afd05489d92	adenocarcinoma	1	1	Arrhythmia	6	1	Right Bundle Branch Block (RBBB)	male	78	61	173	20.3816	1	0	0	ICI+chemotherapy	Pembrolizumab	PD-1	1	1	0	0	0	0	0	0	0	0	0	0	0	0	0	0	0	0	0	0	292	119	10.66	0.8	1.07	0.100375	8.63	0.809568	272.897	8.06542
2502016818	4e9b25b7d662ee4d1f45a0d8c252205b	adenocarcinoma	0	0	no	86.4286	0	no	male	77	72	163	27.0993	1	0	0	ICI+antiangiogenic_therapy	Durvalumab	PD-L1	0	0	0	0	0	0	0	0	0	0	0	0	0	1	0	1	0	0	0	0	174	119	3.75	0.43	1.54	0.410667	1.54	0.410667	112.987	1
2502016885	d8325b0921d4bed2025aa66291aa240b	adenocarcinoma	0	0	no	144.429	0	no	male	61	60	162	22.8624	0	0	0	ICI	Pembrolizumab	PD-1	0	0	0	0	0	0	0	0	0	0	0	0	0	0	0	0	0	0	1	0	301	120	7.68	0.65	1.17	0.152344	5.01	0.652344	257.265	4.28205
2502017442	a3721ce79f74ded7625d43a625ba0fe7	adenocarcinoma	0	0	no	128.857	0	no	male	63	68	176	21.9525	0	0	0	ICI	Pembrolizumab	PD-1	0	0	0	0	0	0	0	0	0	0	0	0	0	0	0	0	0	0	0	0	106	165	3.74	0.48	1.22	0.326203	1.75	0.467914	86.8852	1.43443
2502018231	697bd61361c14a63b119ccd6af4125d7	adenocarcinoma	0	0	no	122.571	0	no	male	75	48	175	15.6735	1	1	1	ICI+chemotherapy+antiangiogenic_therapy	Pembrolizumab	PD-1	1	1	1	0	0	0	0	0	0	0	0	0	0	1	0	1	0	0	0	0	306	120	6.28	0.61	1.23	0.19586	4.26	0.678344	248.78	3.46341
2502021787	a677cf5ab7e82028df32acdde61ca5a0	adenocarcinoma	0	0	no	148.429	0	no	male	57	83	163	31.2394	0	0	0	ICI+chemotherapy	Tislelizumab	PD-1	1	0	1	0	0	0	0	0	0	0	0	0	0	0	0	0	0	0	0	0	184	159	8.4	0.94	1.74	0.207143	5.36	0.638095	105.747	3.08046
2502030787	8ce89cc21e18e13c9be85428c2aba3b4	SCC	0	0	no	154.571	0	no	male	64	79	168	27.9904	1	0	0	ICI+chemotherapy+antiangiogenic_therapy	Toripalimab	PD-1	1	0	1	0	0	0	1	0	1	0	0	0	0	1	0	1	0	0	0	0	196	146	7.15	0.69	2.85	0.398601	3.41	0.476923	68.7719	1.19649
2502032838	410008a9b9a5bc11dc819d1cad632daa	SCC	0	0	no	122.286	0	no	male	77	62	170	21.4533	1	0	0	ICI+chemotherapy	Tislelizumab	PD-1	1	0	0	1	0	0	0	1	0	0	0	0	0	0	0	0	0	0	0	0	391	127	8.39	0.62	1.45	0.172825	5.94	0.707986	269.655	4.09655
2502036320	f9fef159c076d75b73358b3ea5e1fb4f	adenocarcinoma	0	0	no	129.714	0	no	male	71	57	170	19.7232	1	0	0	ICI+chemotherapy	Tislelizumab	PD-1	1	1	0	0	0	0	0	0	1	0	0	0	0	0	0	0	0	1	1	0	268	80	2.89	0.55	0.58	0.200692	1.71	0.591696	462.069	2.94828
2502064044	843c297e7e30195efa4f091f4988e165	adenocarcinoma	0	0	no	135.286	0	no	female	59	44	164	16.3593	0	0	0	ICI+chemotherapy	Tislelizumab	PD-1	1	0	1	1	0	0	1	0	1	0	0	0	0	0	0	0	0	0	0	0	182	118	4.35	0.35	1.29	0.296552	2.39	0.549425	141.085	1.85271
2502067921	464c5ec9d681593ebef3d4c4f6c410fe	adenocarcinoma	0	0	no	56.8571	0	no	female	74	49	155	20.3954	0	0	0	ICI+chemotherapy	Sintilimab	PD-1	1	1	0	0	0	0	1	0	0	0	0	0	0	0	0	0	0	1	0	0	150	83	3.18	0.32	0.64	0.201258	2.19	0.688679	234.375	3.42188
2502070189	682a89a42202c4f56daf9096c2cc644c	adenocarcinoma	0	0	no	104.857	0	no	female	47	54	167	19.1832	0	0	0	ICI+chemotherapy+antiangiogenic_therapy	Pembrolizumab	PD-1	1	0	1	0	0	0	1	1	0	0	0	0	0	1	1	1	1	0	0	0	158	126	6.35	0.51	1.07	0.168504	4.34	0.683465	147.664	4.05607
2502074538	254463ff2d9f7a7524f8ab2a812eca64	SCC	0	0	no	141	0	no	male	59	69	168	24.4118	1	1	0	ICI+chemotherapy	Pembrolizumab	PD-1	1	0	0	0	0	0	0	1	0	0	0	0	0	0	0	0	0	0	0	0	178	116	4.23	0.54	0.76	0.179669	2.82	0.666667	234.211	3.71053
2502116581	e6d69bae877d3cc2d3062677b260e21f	SCC	0	0	no	104.857	0	no	male	77	70	172	23.6614	1	0	0	ICI+chemotherapy+antiangiogenic_therapy	Pembrolizumab	PD-1	1	0	1	0	0	0	0	1	0	0	0	0	0	1	0	1	0	0	0	0	201	122	5.13	0.57	1.06	0.206628	3.01	0.586745	189.623	2.83962
2502150753	801ec25966e8b3fc10b26f851d866cca	adenocarcinoma	0	0	no	84.8571	0	no	male	65	62	165	22.7732	0	0	0	ICI+chemotherapy+antiangiogenic_therapy	Pembrolizumab	PD-1	1	0	1	0	0	0	0	0	1	0	0	0	0	1	1	0	0	0	0	0	330	119	4.98	0.56	1.6	0.321285	2.42	0.485944	206.25	1.5125
2502213516	41f41d79de8ea179580cc8fda938e62e	adenocarcinoma	0	0	no	53.8571	0	no	male	63	55	170	19.0311	0	0	0	ICI+chemotherapy+antiangiogenic_therapy	Atezolizumab	PD-L1	1	0	0	0	0	0	1	0	0	0	0	0	0	1	1	0	0	0	0	0	95	100	0.65	0.09	0.49	0.753846	0.06	0.0923077	193.878	0.122449
2502215657	8da3cdce1b8b19729e862c52351a6985	SCC	0	0	no	85.1429	0	no	male	74	77	175	25.1429	0	0	0	ICI+chemotherapy	Tislelizumab	PD-1	1	0	1	0	0	0	0	0	1	0	0	0	0	0	0	0	0	0	0	0	323	136	4.03	0.44	1.45	0.359801	2.06	0.511166	222.759	1.42069
2502216791	4bd58852d4bb9a7ed771183ed1097191	adenocarcinoma	0	0	no	84.1429	0	no	female	51	49	156	20.1348	0	0	0	ICI+chemotherapy	Pembrolizumab	PD-1	1	1	0	0	0	0	0	1	0	0	0	0	0	0	0	0	0	0	0	0	363	115	6.25	0.47	1.89	0.3024	3.8	0.608	192.063	2.01058
2502255764	5b6ff32ffc8874ae3a53f8d60144db26	SCC	0	0	no	102.429	0	no	male	78	83	172	28.0557	1	1	0	ICI+chemotherapy	Sintilimab	PD-1	1	0	0	1	0	0	0	0	1	0	0	0	0	0	0	0	0	0	0	0	106	145	6.12	0.39	2.03	0.331699	3.43	0.560458	52.2167	1.68966
2502271141	4d416a9f79e607525ef1f72767e28a25	adenocarcinoma	0	0	no	83.8571	0	no	male	62	54	171	18.3646	1	1	0	ICI+chemotherapy	Durvalumab	PD-L1	1	0	0	0	1	0	0	1	0	0	0	0	0	0	0	0	0	0	0	1	216	116	3.78	0.45	1.06	0.280423	2.22	0.587302	203.774	2.09434
2502278054	f0fbee6278a0f6025f1f5db7e86cbf32	adenocarcinoma	0	0	no	87.8571	0	no	male	56	60	169	21.0077	1	0	0	ICI+chemotherapy	Tislelizumab	PD-1	1	0	0	0	1	0	0	0	1	0	0	0	0	0	0	0	0	0	0	0	231	154	8.39	0.8	1.31	0.156138	5.95	0.709178	176.336	4.54198
2502296476	a2e7f342b76d51db46e88cc66fcd254f	SCC	0	0	no	77.2857	0	no	male	59	63	181	19.2302	1	1	0	ICI+chemotherapy	Sintilimab	PD-1	1	0	0	1	0	0	0	1	0	0	0	0	0	0	0	0	0	0	0	0	345	128	7.02	0.52	1.4	0.19943	5.01	0.713675	246.429	3.57857
2502318673	5e7f936a67a3d23a39abc396022c73b1	SCC	0	0	no	52.8571	0	no	male	71	82	170	28.3737	1	0	0	ICI	Tislelizumab	PD-1	0	0	0	0	0	0	0	0	0	0	0	0	0	0	0	0	0	0	1	0	148	138	5.48	0.56	1.64	0.29927	3.06	0.558394	90.2439	1.86585
2502333180	0d89d271cd94bd0830795fec536dd970	SCLC	0	0	no	53.1429	0	no	male	72	81	177	25.8546	1	1	0	ICI+chemotherapy	Durvalumab	PD-L1	1	0	0	0	1	0	0	1	0	0	0	0	0	0	0	0	0	0	0	0	258	131	7.54	0.8	1.3	0.172414	5.34	0.708223	198.462	4.10769
2502340319	f72678af9c6d3de1b890b0a847a9a9d0	adenocarcinoma	0	0	no	76.8571	0	no	male	66	65	173	21.7181	1	0	0	ICI+chemotherapy	Tislelizumab	PD-1	1	1	0	0	0	0	0	1	0	0	0	0	0	0	0	0	0	0	0	0	275	122	14.76	0.43	1.63	0.110434	12.69	0.859756	168.712	7.78528
2502362683	9654f4ac3c0bd584d0178f888742db4e	SCC	0	0	no	61.1429	0	no	male	62	65	170	22.4913	0	0	0	ICI+chemotherapy	Durvalumab	PD-L1	1	0	0	0	1	0	1	0	0	0	0	0	0	0	0	0	0	0	0	0	360	133	9.71	1.22	2.21	0.2276	6.21	0.639547	162.896	2.80995
2502363210	585bc18ba2b25070b34697c20da377d8	adenocarcinoma	0	0	no	34.7143	0	no	male	67	55	160	21.4844	1	1	0	ICI	Sintilimab	PD-1	0	0	0	0	0	0	0	0	0	0	0	0	0	0	0	0	0	0	0	0	103	80	4.78	0.34	0.59	0.123431	3.71	0.776151	174.576	6.28814
2502365275	93d0ac792d2184c8437a94666f8e18b8	SCC	0	0	no	88	0	no	male	67	47	160	18.2422	1	1	0	ICI+chemotherapy	Tislelizumab	PD-1	1	0	1	0	0	0	0	1	1	0	0	0	0	0	0	0	0	0	0	0	104	132	8.01	0.55	1.34	0.167291	6.02	0.751561	77.6119	4.49254
2502375954	65659c005957b3900926f25abb0ada6e	adenocarcinoma	0	0	no	78	0	no	male	66	70	166	25.4028	1	0	0	ICI	Pembrolizumab	PD-1	0	0	0	0	0	0	0	0	0	0	0	0	0	0	0	0	0	0	0	0	304	103	9.3	1.17	1.35	0.145161	6.16	0.662366	225.185	4.56296
2502377667	51eeeb58c563c766dc1fba8aa08a7e4b	SCLC	0	0	no	43.7143	0	no	male	69	53	162	20.1951	1	1	0	ICI+chemotherapy	Atezolizumab	PD-L1	1	0	0	0	1	0	1	0	1	0	0	0	0	0	0	0	0	1	1	0	484	120	14.7	1.21	1.05	0.0714286	12.29	0.836054	460.952	11.7048
2502378788	f529260e982001c9506052416e50ce08	adenocarcinoma	0	0	no	30.8571	0	no	female	60	54	156	22.1893	0	0	0	ICI+chemotherapy	Tislelizumab	PD-1	1	1	0	0	0	0	0	1	0	0	0	0	0	0	0	0	0	0	0	0	198	81	7.6	0.72	1.23	0.161842	5.57	0.732895	160.976	4.52846
2801035537	2e69bc33eb9de6ca4646e3cd5f53ca8e	NSCLC	0	0	no	138.143	0	no	female	36	53	164	19.7055	0	0	0	ICI	Camilizumab	PD-1	0	0	0	0	0	0	0	0	0	0	0	0	0	0	0	0	0	0	0	0	133	147	6.84	0.32	1.47	0.214912	4.94	0.722222	90.4762	3.36054
2801051037	89514a5c5add66fb744bda95d2ed1782	adenocarcinoma	0	0	no	118.286	0	no	female	53	47	153	20.0777	0	0	0	ICI+chemotherapy	Sintilimab	PD-1	1	0	0	1	0	0	0	1	0	0	0	0	0	0	0	0	0	0	0	0	485	98	8.16	0.78	1.43	0.175245	5.9	0.723039	339.161	4.12587
2801065693	5233dc988153c00c0688a85e849db894	adenocarcinoma	0	0	no	51.8571	0	no	male	74	66	171	22.4001	1	1	0	ICI+chemotherapy	Pembrolizumab	PD-1	1	1	0	0	0	0	0	1	0	0	0	0	0	0	0	0	0	0	0	0	351	84	12.22	1.14	2.07	0.169394	8.68	0.710311	169.565	4.19324
2801067701	00f255d60dd0a922b1bf24bb17eef178	SCC	0	0	no	53.5714	0	no	male	67	78	168	27.6361	1	1	0	ICI+chemotherapy+antiangiogenic_therapy	Tislelizumab	PD-1	1	0	1	1	0	0	0	1	0	0	0	0	0	1	0	1	0	0	1	0	234	136	7.02	0.51	1.69	0.240741	4.61	0.656695	138.462	2.72781
2801082522	c1e78206d73c1045343fcf5dae2ba49b	adenocarcinoma	0	0	no	139.429	0	no	male	72	68	172	22.9854	1	1	0	ICI+chemotherapy+antiangiogenic_therapy	Camilizumab	PD-1	1	1	0	0	0	0	0	0	0	0	0	0	0	1	1	0	0	1	1	0	325	141	10.4	0.25	1.24	0.119231	8.9	0.855769	262.097	7.17742
2801109034	e5b772ac88070ad29d9db1e85212a74e	SCC	0	0	no	134.571	0	no	male	65	65	177	20.7476	0	0	0	ICI+chemotherapy	Camilizumab	PD-1	1	1	0	0	0	0	0	1	0	0	0	0	0	0	0	0	0	0	0	0	218	121	7.38	0.56	2.5	0.338753	4.24	0.574526	87.2	1.696
2801109740	2eac8a8a3568bce56928452fe0ad99a3	SCC	0	0	no	93	0	no	female	56	51	153	21.7865	0	0	0	ICI+chemotherapy	Tislelizumab	PD-1	1	0	0	0	0	0	0	1	0	0	0	0	0	0	0	0	0	0	0	0	421	115	6.59	0.58	1.74	0.264036	4.13	0.626707	241.954	2.37356
2801110246	a981968ff1f6f9469c226c010c201494	adenocarcinoma	0	0	no	130.143	0	no	male	64	74	163	27.852	0	0	0	ICI+chemotherapy+antiangiogenic_therapy	Pembrolizumab	PD-1	1	1	0	0	0	0	1	0	0	0	0	0	0	1	0	0	1	0	1	0	419	127	4.37	0.64	1.26	0.28833	2.43	0.556064	332.54	1.92857
2801117155	9a16568bbdf69fb9b8cad1642009741c	SCC	0	0	no	104	0	no	male	66	90	172	30.4218	1	1	0	ICI	Durvalumab	PD-L1	0	0	0	0	0	0	0	0	0	0	0	0	0	0	0	0	0	0	1	0	129	125	4.23	0.69	1.27	0.300236	2.04	0.48227	101.575	1.6063
2801127487	4d5674d9747a5ec010a1b5af319ca3de	SCC	0	0	no	127.714	0	no	male	61	83	177	26.493	1	0	0	ICI+chemotherapy	Pembrolizumab	PD-1	1	0	1	1	0	0	0	1	0	0	0	0	0	0	0	0	0	0	0	0	187	145	8.41	0.11	1.01	0.120095	7.28	0.865636	185.149	7.20792
2801148220	8acc79dde2b1c51f4cbb0ab886c6d4df	SCC	0	0	no	114.571	0	no	male	67	74	169	25.9095	1	0	0	ICI+chemotherapy	Tislelizumab	PD-1	1	0	1	0	0	0	1	0	0	0	0	0	0	0	0	0	0	0	1	0	134	127	10.69	0.09	0.82	0.0767072	9.77	0.913938	163.415	11.9146
9010133881	ec9f06eee00dc8e756e97b8d423ad0cf	SCC	0	0	no	59	0	no	male	54	56	168	19.6641	0	0	0	ICI+chemotherapy	Tislelizumab	PD-1	1	1	0	0	0	0	0	1	0	0	0	0	0	0	0	0	0	0	0	0	338	105	4.03	0.42	1.02	0.253102	2.55	0.632754	331.373	2.5
60010019787	1e0affbff120536604164ec9a9c28ee7	SCLC	0	0	no	178.429	0	no	male	80	80	174	26.4236	1	0	0	ICI+chemotherapy	Durvalumab	PD-L1	1	0	0	0	1	0	0	0	1	0	0	0	0	0	0	0	0	0	0	0	133	102	4.82	0.41	1.43	0.29668	2.89	0.599585	93.007	2.02098
60010020003	aed91c786ba603ba896a1c308617ec06	NET	0	0	no	28.4286	0	no	male	67	62	168	21.9671	0	0	0	ICI	Durvalumab	PD-L1	0	0	0	0	0	0	0	0	0	0	0	0	0	0	0	0	0	1	1	0	284	108	5.99	0.36	0.97	0.161937	4.54	0.75793	292.784	4.68041
60010027357	54f9092554fb1895bc0b6262f89ab387	adenocarcinoma	1	1	Arrhythmia	3.5	1	Poor R-wave Progression (PRWP) in Precordial Leads, Frequent Ventricular Premature Beats (VPBs)	female	34	48	162	18.2899	0	0	0	ICI+chemotherapy	Pembrolizumab	PD-1	1	1	0	0	0	0	0	1	0	0	0	0	0	0	0	0	0	0	0	0	317	99	3.9	0.23	1.35	0.346154	2.22	0.569231	234.815	1.64444
60010029356	8c4d568ef019fda11241cc2e715db716	SCC	0	0	no	187.429	0	no	male	70	46	156	18.902	0	0	0	ICI	Pembrolizumab	PD-1	0	0	0	0	0	0	0	0	0	0	0	0	0	0	0	0	0	0	0	0	265	142	16.21	1	1.38	0.0851326	13.48	0.831585	192.029	9.76812
60010029786	c07fe5ad26325e15f81979fe6a3d3183	adenocarcinoma	0	0	no	181.714	0	no	male	73	84	168	29.7619	1	0	0	ICI+chemotherapy	Pembrolizumab	PD-1	1	0	0	0	0	1	0	0	0	0	0	0	0	0	0	0	0	0	0	0	194	129	3.84	0.37	0.8	0.208333	2.46	0.640625	242.5	3.075
60010032456	db1648a4a08d003f1c1e15dd6475463e	SCC	0	0	no	194.571	0	no	male	66	48	162	18.2899	1	1	0	ICI+chemotherapy	Pembrolizumab	PD-1	1	0	1	0	0	0	0	0	0	0	0	0	0	0	0	0	0	0	1	0	228	144	8.58	0.66	2.28	0.265734	5.44	0.634033	100	2.38596
60010035488	c9261f94a08d65836c4576d8f405fb7b	adenocarcinoma	0	0	no	185.429	0	no	male	43	82	173	27.3982	0	0	0	ICI+chemotherapy	Pembrolizumab	PD-1	1	1	0	0	0	0	0	1	0	0	0	0	0	0	0	0	0	0	0	0	308	118	11.88	1.87	1.34	0.112795	8.62	0.725589	229.851	6.43284
60010041713	0b07e175584f0782e7cbbb170d67134e	LCC	0	0	no	161.857	0	no	male	71	70	168	24.8016	1	0	0	ICI	Durvalumab	PD-L1	0	0	0	0	0	0	0	0	0	0	0	0	0	0	0	0	0	0	0	0	299	100	14.39	1.22	2.02	0.140375	10.64	0.739402	148.02	5.26733
60010046167	e9ac4e270ce5e5ebbeebd50c6a8f1b93	adenocarcinoma	0	0	no	117.857	0	no	female	76	64	155	26.6389	0	0	0	ICI+chemotherapy	Tislelizumab	PD-1	1	0	1	0	0	0	0	1	0	0	0	0	0	0	0	0	0	0	1	0	243	130	11.49	0.88	2.33	0.202785	8.24	0.717145	104.292	3.53648
60010054122	efd9f9b5e6e71956de0c0f3366dfa7b7	SCC	0	0	no	192.286	0	no	female	80	49	152	21.2084	0	0	0	ICI+chemotherapy	Pembrolizumab	PD-1	1	0	1	0	0	0	0	0	0	0	0	0	0	0	0	0	0	0	0	0	206	128	11.41	1.01	1.92	0.168273	8.31	0.728309	107.292	4.32812
60010055240	0ed999679064ebe7cfdb8b288fba44e1	SCC	0	0	no	53.2857	0	no	female	74	65	169	22.7583	0	0	0	ICI+chemotherapy	Tislelizumab	PD-1	1	0	1	0	0	0	0	0	1	0	0	0	0	0	0	0	0	0	0	0	263	109	5.01	0.44	0.73	0.145709	3.72	0.742515	360.274	5.09589
60010058581	fd3dfdc3fc30af40c9074b92574bb753	SCC	1	1	Arrhythmia	8	1	Atrial Premature Beat (APB)	male	67	55	152	23.8054	0	0	0	ICI	Sintilimab	PD-1	0	0	0	0	0	0	0	0	0	0	0	0	0	0	0	0	0	0	0	0	132	148	3.99	0.31	1.42	0.35589	2.11	0.528822	92.9577	1.48592
60010067741	c32d289e4e6d12af7423381f6fb0b3e2	SCC	0	0	no	34.7143	0	no	female	53	52	151	22.806	0	0	0	ICI	Tislelizumab	PD-1	0	0	0	0	0	0	0	0	0	0	0	0	0	0	0	0	0	0	0	0	41	62	6.95	0.33	0.99	0.142446	5.57	0.801439	41.4141	5.62626
60010068843	c31187588a40bb2e2a15ffcb7cb57a47	SCC	0	0	no	184.429	0	no	male	74	76	179	23.7196	1	1	0	ICI	Camilizumab	PD-1	0	0	0	0	0	0	0	0	0	0	0	0	0	0	0	0	0	0	0	0	289	134	11.32	1.04	2.37	0.209364	7	0.618375	121.941	2.95359
60010072828	754becb1f292db7650468e9249fb93d2	adenocarcinoma	0	0	no	161.286	0	no	male	66	64	169	22.4082	1	1	0	ICI+chemotherapy	Toripalimab	PD-1	1	0	0	0	0	0	0	1	0	0	0	0	0	0	0	0	0	0	0	0	233	120	5.48	0.64	1.57	0.286496	2.86	0.521898	148.408	1.82166
60010076444	f8fb15ef9cf6f34a636248018578178e	SCC	0	0	no	143.429	0	no	male	80	58	170	20.0692	1	0	0	ICI+chemotherapy	Tislelizumab	PD-1	1	0	1	0	0	0	0	0	0	0	0	0	0	0	0	0	0	0	0	0	139	105	6.83	0.69	1.18	0.172767	4.84	0.708638	117.797	4.10169
60010094598	2d1cdbfedc03c126ddde44b4f76fe1e6	SCLC	0	0	no	180.714	0	no	male	60	62	161	23.9188	1	1	0	ICI+chemotherapy	Sintilimab	PD-1	1	0	0	0	1	0	1	0	0	0	0	0	0	0	0	0	0	0	0	0	455	145	9.85	0.66	2.07	0.210152	6.91	0.701523	219.807	3.33816
60010100053	3491f6d1013625365e4ee7bcc81d299b	SCC	0	0	no	108.571	0	no	male	52	62	158	24.8358	1	1	0	ICI+chemotherapy	Tislelizumab	PD-1	1	0	1	0	0	0	0	0	1	0	0	0	0	0	0	0	0	1	1	0	198	137	5.69	0.73	1.1	0.193322	3.68	0.646749	180	3.34545
60010109419	1cce7a0fe35f1dc1170658166af7e955	SCC	0	0	no	124.571	0	no	male	53	69	170	23.8754	0	0	0	ICI+chemotherapy	Camilizumab	PD-1	1	1	0	0	0	0	0	1	0	0	0	0	0	0	0	0	0	0	0	0	171	143	6.45	0.5	0.89	0.137984	4.96	0.768992	192.135	5.57303
60010110068	8ba104444ecf77c1952b57ffb87f48df	SCC	0	0	no	65.5714	0	no	male	70	68	175	22.2041	0	0	0	ICI+antiangiogenic_therapy	Tislelizumab	PD-1	0	0	0	0	0	0	0	0	0	0	0	0	0	1	0	1	0	0	0	0	145	121	6.82	0.77	0.55	0.0806452	5.28	0.774194	263.636	9.6
60010114133	8829af459599b5475b992649b16a7006	SCC	1	1	Myocarditis	48	0	no	male	75	56	172	18.9292	1	0	0	ICI	Pembrolizumab	PD-1	0	0	0	0	0	0	0	0	0	0	0	0	0	0	0	0	0	0	1	0	269	128	12.83	1	2.22	0.173032	9.29	0.724084	121.171	4.18468
60010118759	3f2d53467a9d922c753c394fca44f8dc	SCC	0	0	no	154.857	0	no	male	74	73	163	27.4756	0	0	1	ICI+chemotherapy+antiangiogenic_therapy	Tislelizumab	PD-1	1	0	1	0	0	0	1	0	0	0	0	0	0	1	0	0	1	0	1	0	216	112	3.25	0.45	0.68	0.209231	1.85	0.569231	317.647	2.72059
60010136138	eea265718fe1ed82be5dacdc91fe324f	sarcomatoid carcinoma	0	0	no	153.429	0	no	male	65	80	180	24.6914	1	0	0	ICI+chemotherapy+antiangiogenic_therapy	Pembrolizumab	PD-1	1	1	0	0	0	0	1	0	0	0	0	0	0	1	1	0	0	0	0	0	179	141	6.45	0.8	1.76	0.272868	3.42	0.530233	101.705	1.94318
60010146265	751e633875b52661e51b84cf7de12fe7	SCLC	0	0	no	165	0	no	male	67	61	165	22.4059	1	1	0	ICI+chemotherapy	Pembrolizumab	PD-1	1	0	0	0	0	0	0	1	0	0	0	0	0	0	0	0	0	1	0	0	271	131	14.23	0.8	0.85	0.059733	12.58	0.884048	318.824	14.8
60010148143	0a67027edfa31cfa75c0fdd25dd70438	adenocarcinoma	0	0	no	166.857	0	no	male	61	80	183	23.7391	1	0	0	ICI+chemotherapy+antiangiogenic_therapy	Durvalumab	PD-L1	1	1	0	0	0	0	0	0	0	0	0	0	0	1	0	1	0	0	0	0	533	101	3.5	0.73	1.22	0.348571	1.28	0.365714	436.885	1.04918
60010148447	6a3abc3998e8738968ec1f6315310dab	NET	1	1	Arrhythmia	5.5	1	Left Anterior Fascicular Block (LAFB)	male	70	64	170	22.1453	1	0	1	ICI+chemotherapy	Durvalumab	PD-L1	1	0	0	0	1	1	1	1	0	0	0	0	0	0	0	0	0	0	0	0	248	120	5.08	0.22	1.05	0.206693	3.56	0.700787	236.19	3.39048
60010149113	979ff3868f2656ca91f825d004ba72f8	adenocarcinoma	0	0	no	40.2857	0	no	male	60	62	171	21.2031	1	0	0	ICI+chemotherapy	Tislelizumab	PD-1	1	1	0	0	0	0	0	0	1	0	0	0	0	0	0	0	0	0	0	0	362	144	7.57	0.55	2.45	0.323646	4.46	0.589168	147.755	1.82041
60010155398	e27297656f594a59854f6c7f92a47859	SCLC	0	0	no	91.2857	0	no	female	70	46	150	20.4444	0	0	0	ICI+chemotherapy	Durvalumab	PD-L1	1	0	0	0	0	1	1	0	0	0	0	0	0	0	0	0	0	0	1	0	320	112	6.43	0.52	0.78	0.121306	5.09	0.791602	410.256	6.52564
60010162359	cf46d79336e83b31171d1cc94bbe8f45	SCC	0	0	no	35.4286	0	no	male	54	53	161	20.4467	1	0	1	ICI+chemotherapy	Tislelizumab	PD-1	1	0	1	1	0	0	1	0	0	0	0	0	0	0	0	0	0	0	0	0	263	143	6.16	0.73	1.74	0.282468	3.27	0.530844	151.149	1.87931
60010170939	4ba79516ff5fff3da06027a218f2314e	adenocarcinoma	0	0	no	147.571	0	no	male	62	53	165	19.4674	0	0	0	ICI+chemotherapy+antiangiogenic_therapy	Pembrolizumab	PD-1	1	1	0	0	0	0	0	0	0	0	0	0	0	1	1	0	0	0	0	0	799	89	11.57	1.64	2.67	0.230769	7.24	0.625756	299.251	2.71161
60010173627	2ece2c3b6099d6d3a1d8c114f5176e36	SCC	0	0	no	166.571	0	no	male	60	57	165	20.9366	1	0	0	ICI+chemotherapy+antiangiogenic_therapy	Tislelizumab	PD-1	1	0	0	1	0	0	0	1	0	0	0	0	0	1	0	0	1	0	0	0	284	105	7.88	1.65	1.12	0.142132	4.99	0.633249	253.571	4.45536
60010177089	8b566ac969e2b0bdcc4f451ade663154	adenocarcinoma	0	0	no	149.714	0	no	male	60	69	176	22.2753	0	0	0	ICI+chemotherapy+antiangiogenic_therapy	Pembrolizumab	PD-1	1	1	0	0	0	0	0	1	0	0	0	0	0	1	1	0	0	0	0	0	257	110	8.85	0.21	0.53	0.059887	8.1	0.915254	484.906	15.283
60010181149	4926096241eed62d1b6a9eb7e1d05440	adenocarcinoma	0	0	no	154.714	0	no	female	50	73	180	22.5309	0	0	0	ICI+chemotherapy	Camilizumab	PD-1	1	1	0	0	0	0	0	1	0	0	0	0	0	0	0	0	0	0	0	0	283	125	6.17	0.52	1.71	0.277147	3.87	0.627229	165.497	2.26316
60010184391	4f149bb8f15e02e330e5f03bb99114bc	sarcomatoid carcinoma	0	0	no	168.429	0	no	male	58	54	160	21.0938	1	1	0	ICI+chemotherapy	Nivolumab	PD-1	1	0	1	0	0	0	1	0	0	0	0	0	0	0	0	0	0	0	0	0	634	79	29.87	2.71	3.2	0.107131	23.84	0.798125	198.125	7.45
60010185157	b1f4682ec0f49e137192994ddb7a49bd	adenocarcinoma	0	0	no	124.429	0	no	male	50	56	158	22.4323	1	0	0	ICI	Tislelizumab	PD-1	0	0	0	0	0	0	0	0	0	0	0	0	0	0	0	0	0	0	0	0	191	140	11.21	0.88	3.05	0.272079	6.46	0.576271	62.623	2.11803
60010188567	979d4c879802a5e3509a086b0ec5c841	NSCLC	0	0	no	130.714	0	no	female	66	50	156	20.5457	0	0	0	ICI	Tislelizumab	PD-1	0	0	0	0	0	0	0	0	0	0	0	0	0	0	0	0	0	0	1	0	217	107	5.72	0.52	0.73	0.127622	4.17	0.729021	297.26	5.71233
60010199061	07d858119ca5609bf6245e019345b206	adenosquamous carcinoma	0	0	no	45	0	no	male	59	82	170	28.3737	1	1	0	ICI+antiangiogenic_therapy	Sintilimab	PD-1	0	0	0	0	0	0	0	0	0	0	0	0	0	1	1	0	0	1	1	0	206	150	8.1	0.05	0.89	0.109877	7.15	0.882716	231.461	8.03371
60010200709	743a77a5dda71b9e2420dc3fc4770a88	adenocarcinoma	0	0	no	73.8571	0	no	female	59	46	160	17.9688	0	0	0	ICI+chemotherapy	Tislelizumab	PD-1	1	1	0	0	0	0	0	1	0	0	0	0	0	0	0	0	0	0	0	0	127	101	2.45	0.25	0.53	0.216327	1.59	0.64898	239.623	3
60010203353	31af203bf1a496ff9dc230014f7646bc	SCC	0	0	no	147.429	0	no	male	60	77	166	27.9431	1	0	1	ICI+chemotherapy	Tislelizumab	PD-1	1	0	1	0	1	0	0	1	0	0	0	0	0	0	0	0	0	1	0	0	144	121	5.16	0.56	2.06	0.399225	2.39	0.463178	69.9029	1.16019
60010208375	91054e98f1367134f9e14f69afc511b7	adenocarcinoma	0	0	no	160.714	0	no	male	50	61	163	22.9591	1	1	0	ICI+chemotherapy+antiangiogenic_therapy	Sintilimab	PD-1	1	1	0	1	0	0	1	0	0	0	0	0	0	1	1	0	0	0	0	0	195	134	7.11	0.69	1.73	0.243319	4.59	0.64557	112.717	2.65318
60010212328	dbe7d92b5cc5370102610f6bc682ff37	adenocarcinoma	0	0	no	155.286	0	no	male	68	75	170	25.9516	1	1	0	ICI+chemotherapy	Camilizumab	PD-1	1	1	0	0	0	0	0	1	0	0	0	0	0	0	0	0	0	0	0	0	236	119	5.07	0.5	2.4	0.473373	2.1	0.414201	98.3333	0.875
60010213495	0ff77d0cb006d1d35f75c92abd663c73	SCC	0	0	no	142.143	0	no	male	37	82	180	25.3086	1	0	1	ICI+chemotherapy+antiangiogenic_therapy	Pembrolizumab	PD-1	1	0	1	0	0	1	1	0	0	0	0	0	0	1	1	0	0	0	0	0	180	145	10.6	1.12	1.97	0.185849	7.29	0.687736	91.3706	3.70051
60010215108	cbc099e0baad69400bb2a7ed4e9d7071	SCC	0	0	no	171.714	0	no	male	68	59	165	21.6713	1	1	0	ICI+chemotherapy	Nivolumab	PD-1	1	0	1	0	0	0	0	0	0	0	0	0	0	0	0	0	0	0	0	0	215	149	3.87	0.35	1.66	0.428941	1.71	0.44186	129.518	1.03012
60010224080	1c37b567763e54179ffa3df8f54d57aa	adenocarcinoma	0	0	no	150.714	0	no	male	66	61	167	21.8724	1	0	0	ICI+chemotherapy	Sintilimab	PD-1	1	1	0	0	0	0	1	0	0	0	0	0	0	0	0	0	0	0	0	0	272	113	6.7	0.71	2.16	0.322388	3.63	0.541791	125.926	1.68056
60010225915	b83bb5e78d37c176ac856fe3d357fa27	SCC	0	0	no	167.571	0	no	male	70	60	166	21.7738	1	1	0	ICI+chemotherapy+antiangiogenic_therapy	Tislelizumab	PD-1	1	0	1	1	0	0	1	1	0	0	0	0	0	1	0	0	1	1	0	0	267	113	8.16	1.17	0.71	0.0870098	6.2	0.759804	376.056	8.73239
60010233420	f17a76e2ddbceae0f188b33505a9826e	SCLC	0	0	no	56.8571	0	no	male	54	67	171	22.913	1	1	0	ICI+chemotherapy	Durvalumab	PD-L1	1	0	0	0	1	0	0	1	0	0	0	0	0	0	0	0	0	0	0	0	213	151	6.04	0.46	2.54	0.42053	2.92	0.483444	83.8583	1.14961
60010244135	54558587074b355112c966ea7b67db83	SCC	1	2	Arrhythmia	3	1	Left Anterior Fascicular Block (LAFB)	male	83	64	167	22.9481	1	0	1	ICI	Tislelizumab	PD-1	0	0	0	0	0	0	0	0	0	0	0	0	0	0	0	0	0	0	1	0	113	82	6.45	0.5	1.02	0.15814	3.38	0.524031	110.784	3.31373
60010255022	d899ec2943a96a5316d2250182e3b75d	SCC	0	0	no	78.1429	0	no	male	58	72	167	25.8166	0	0	0	ICI+chemotherapy	Tislelizumab	PD-1	1	0	1	0	0	0	0	1	0	0	0	0	0	0	0	0	0	0	0	0	339	122	8.18	0.84	1.96	0.239609	4.86	0.594132	172.959	2.47959
60010258386	bf3f303f25c81d4442d088d3a36e0ac2	adenocarcinoma	0	0	no	79.7143	0	no	female	51	69	165	25.3444	0	0	0	ICI+antiangiogenic_therapy	Tislelizumab	PD-1	0	0	0	0	0	0	0	0	0	0	0	0	0	1	0	1	0	0	0	0	272	119	5.96	0.37	1.17	0.196309	4.34	0.728188	232.479	3.7094
60010270952	051b184e6b09f343c7d862954e8bce7c	adenocarcinoma	0	0	no	160.571	0	no	male	65	54	154	22.7694	1	0	0	ICI+chemotherapy	Camilizumab	PD-1	1	0	1	0	0	0	1	0	0	0	0	0	0	0	0	0	0	0	1	0	338	152	6.08	0.62	1.35	0.222039	4.02	0.661184	250.37	2.97778
60010271960	9f296ecb7dfd7055f0d7667fff28ed91	adenocarcinoma	0	0	no	77.7143	0	no	female	62	64	161	24.7676	0	0	0	ICI+chemotherapy	Camilizumab	PD-1	1	1	0	0	0	0	0	0	1	0	0	0	0	0	0	0	0	0	0	0	157	126	4.15	0.28	1.92	0.462651	1.65	0.39759	81.7708	0.859375
60010272818	106b4558463c495b5c78cb46b34bc2fd	SCC	0	0	no	150.571	0	no	female	48	67	160	26.1719	0	0	0	ICI+targeted_therapy	Durvalumab	PD-L1	0	0	0	0	0	0	0	0	0	1	0	1	0	0	0	0	0	0	0	0	453	105	3.16	0.3	1.19	0.376582	1.65	0.522152	380.672	1.38655
60010276117	186a0bd4590c78d77f3325ba51acf6b0	adenosquamous carcinoma	0	0	no	131.571	0	no	male	69	58	162	22.1003	1	1	0	ICI+antiangiogenic_therapy	Pembrolizumab	PD-1	0	0	0	0	0	0	0	0	0	0	0	0	0	1	0	1	1	1	1	0	354	105	11.9	0.88	1.92	0.161345	8.87	0.745378	184.375	4.61979
60010277798	ff7e942ea49e1cc5ae2a3fa7788d894a	adenocarcinoma	0	0	no	110.857	0	no	male	53	59	169	20.6575	0	0	0	ICI+antiangiogenic_therapy	Camilizumab	PD-1	0	0	0	0	0	0	0	0	0	0	0	0	0	1	0	1	0	0	0	0	394	121	1.74	0.6	0.57	0.327586	0.51	0.293103	691.228	0.894737
60010282648	9242354093c5b695f5218f1375f7c8ae	SCC	0	0	no	159.571	0	no	male	62	65	171	22.2291	1	1	0	ICI+chemotherapy	Tislelizumab	PD-1	1	0	0	0	0	0	0	1	1	0	0	0	0	0	0	0	0	0	0	0	169	132	9.97	0.79	1.1	0.110331	8	0.802407	153.636	7.27273
60010283417	7ce1cc3101d409ba1b650664b01c6f2e	SCC	0	0	no	164.143	0	no	male	64	64	168	22.6757	0	0	0	ICI+chemotherapy+antiangiogenic_therapy	Pembrolizumab	PD-1	1	1	0	0	0	0	1	1	0	0	0	0	0	1	0	0	1	0	0	0	232	116	3.14	0.41	0.71	0.226115	2	0.636943	326.761	2.8169
60010283521	557fe3e7837fa5e42699eb54c0882067	adenocarcinoma	0	0	no	155.571	0	no	female	62	73	164	27.1416	0	0	0	ICI+chemotherapy	Tislelizumab	PD-1	1	1	0	0	0	0	0	1	0	0	0	0	0	0	0	0	0	0	0	0	286	125	5.4	0.62	1.87	0.346296	2.69	0.498148	152.941	1.4385
60010302971	1932895439e3cb4d59b2b98202ea9ffc	SCC	0	0	no	113.857	0	no	male	56	75	172	25.3515	1	1	0	ICI+chemotherapy	Sintilimab	PD-1	1	0	1	0	0	0	0	0	0	0	0	0	0	0	0	0	0	0	0	0	178	125	4.79	0.43	0.95	0.19833	3.28	0.68476	187.368	3.45263
60010305398	e6b687d00ad5e4ffc334857fdbd7dadf	sarcomatoid carcinoma	0	0	no	72.5714	0	no	male	56	93	175	30.3673	0	0	0	ICI+chemotherapy	Camilizumab	PD-1	1	1	0	0	0	0	0	0	1	0	0	0	0	0	0	0	0	0	0	0	249	134	9.99	0.14	0.86	0.0860861	8.98	0.898899	289.535	10.4419
60010305608	5d4cdb3a0287598e15105028b959c66c	adenocarcinoma	0	0	no	61.1429	0	no	male	51	58	165	21.3039	0	0	0	ICI+antiangiogenic_therapy	Sintilimab	PD-1	0	0	0	0	0	0	0	0	0	0	0	0	0	1	1	0	0	0	0	0	341	77	7.19	0.83	0.49	0.0681502	5.78	0.803894	695.918	11.7959
60010305891	adc623ce8053c8d2b7972d501d112caf	SCC	0	0	no	124.143	0	no	male	74	59	167	21.1553	1	0	0	ICI+chemotherapy+antiangiogenic_therapy	Camilizumab	PD-1	1	0	1	0	0	0	0	1	0	0	0	0	0	1	0	0	1	1	1	0	171	92	3.14	0.08	0.31	0.0987261	2.74	0.872611	551.613	8.83871
60010309131	1592c84e8169a22f65f540f5b404cc0a	SCLC	0	0	no	161.571	0	no	female	66	67	160	25.9766	0	0	0	ICI+chemotherapy	Tislelizumab	PD-1	1	0	0	0	1	0	0	1	0	0	0	0	0	0	0	0	0	0	0	0	437	103	4.37	0.46	1.54	0.352403	2.34	0.535469	283.766	1.51948
60010309216	213669fdb7df216cf39e9a96f0ba9a8c	SCLC	0	0	no	155.286	0	no	male	61	54	153	23.0681	1	0	0	ICI+chemotherapy+antiangiogenic_therapy	Durvalumab	PD-L1	1	0	1	1	0	0	1	1	0	0	0	0	0	1	0	0	1	0	0	0	354	115	5.88	0.49	1.5	0.255102	3.59	0.610544	236	2.39333
60010311288	51f033ffc5d05b89a31aff183bbc97ca	SCLC	0	0	no	144.286	0	no	male	70	75	157	30.4272	1	1	0	ICI+chemotherapy	Tislelizumab	PD-1	1	0	1	1	0	0	0	1	0	0	0	0	0	0	0	0	0	1	1	0	315	95	7.85	0.77	1.69	0.215287	5.14	0.654777	186.391	3.04142
60010312517	c9ed41f5a2aefc447f391406d68dab46	SCLC	0	0	no	111.714	0	no	male	74	72	166	26.1286	0	0	0	ICI+chemotherapy	Atezolizumab	PD-L1	1	0	0	0	1	0	0	1	0	0	0	0	0	0	0	0	0	0	0	0	183	161	9.81	0.8	1.46	0.148828	7.38	0.752294	125.342	5.05479
60010317587	4e483137e2e363433a6389912e826bc2	NET	0	0	no	137.857	0	no	male	70	54	162	20.5761	1	1	0	ICI	Tislelizumab	PD-1	0	0	0	0	0	0	0	0	0	0	0	0	0	0	0	0	0	0	0	0	103	91	7.61	0.93	1.96	0.257556	4.47	0.587385	52.551	2.28061
60010319904	3f5e3d7020e9905a29b58137a3ae0369	SCC	0	0	no	160.714	0	no	male	66	60	167	21.5139	1	1	0	ICI+chemotherapy	Camilizumab	PD-1	1	0	0	1	0	0	0	0	1	0	0	0	0	0	0	0	0	1	1	0	285	131	10.74	0.52	1.71	0.159218	8.41	0.783054	166.667	4.91813
60010328724	295ea01d3db15ccfee85a9045861c3dd	SCC	0	0	no	98.1429	0	no	male	65	74	165	27.2176	0	0	0	ICI+chemotherapy	Tislelizumab	PD-1	1	1	0	0	0	0	0	1	0	0	0	0	0	0	0	0	0	0	0	0	219	85	7.46	0.59	0.98	0.131367	5.5	0.737265	223.469	5.61224
60010330472	f0d149610083f2145d2329ddc3aaf288	SCC	0	0	no	89.5714	0	no	female	60	77	158	30.8444	0	0	0	ICI+chemotherapy	Tislelizumab	PD-1	1	1	0	0	0	0	0	1	0	0	0	0	0	0	0	0	0	0	1	0	337	136	5.45	0.5	1.97	0.361468	2.82	0.517431	171.066	1.43147
60010330646	7c6f580093a61080448fc246a1692542	adenocarcinoma	0	0	no	155.286	0	no	female	51	53	170	18.3391	0	0	0	ICI+chemotherapy	Tislelizumab	PD-1	1	1	0	0	0	0	1	0	0	0	0	0	0	0	0	0	0	0	0	0	295	108	6.04	0.32	1.59	0.263245	4.06	0.672185	185.535	2.55346
60010330871	8d3ecfa629b838c3eb8fdf61b06adf3a	adenocarcinoma	0	0	no	153.286	0	no	male	72	59	159	23.3377	1	1	0	ICI+chemotherapy+antiangiogenic_therapy	Sintilimab	PD-1	1	0	1	0	0	0	0	1	0	0	0	0	0	1	0	0	1	0	1	0	106	121	4.27	0.07	1.4	0.327869	2.63	0.615925	75.7143	1.87857
60010336005	a61cc13f20d5ed835ceeb1e066738c0a	adenocarcinoma	0	0	no	146.571	0	no	male	62	70	162	26.6728	0	0	0	ICI	Sintilimab	PD-1	0	0	0	0	0	0	0	0	0	0	0	0	0	0	0	0	0	1	0	0	446	103	12.36	1.12	2.14	0.173139	8.96	0.724919	208.411	4.18692
60010338175	1e2a9674676847d1f4ecc71fe6d6156e	adenocarcinoma	0	0	no	151.571	0	no	male	67	65	170	22.4913	1	1	0	ICI+chemotherapy	Camilizumab	PD-1	1	1	1	0	0	0	1	1	0	0	0	0	0	0	0	0	0	0	0	0	404	110	6.8	0.53	1.7	0.25	4.49	0.660294	237.647	2.64118
60010344452	24090758178109a775e3bad2aeee2a91	SCC	0	0	no	157.571	0	no	male	63	63	163	23.7118	1	1	0	ICI+chemotherapy	Pembrolizumab	PD-1	1	0	1	1	0	0	0	1	0	0	0	0	0	0	0	0	0	0	1	0	268	131	3.84	0.12	0.87	0.226562	2.76	0.71875	308.046	3.17241
60010346007	9d8959fba0b1bf93ec1e0b1e3e684229	SCLC	0	0	no	119	0	no	male	71	56	170	19.3772	1	0	0	ICI+chemotherapy+antiangiogenic_therapy	Durvalumab	PD-L1	1	0	0	0	1	0	0	0	1	0	0	0	0	1	0	1	0	0	0	0	296	90	5.64	1.31	1.56	0.276596	2.74	0.485816	189.744	1.75641
60010354257	e695c39ae36741986c9eced3ebd61219	SCC	0	0	no	59	0	no	male	50	69	165	25.3444	0	0	0	ICI+chemotherapy	Pembrolizumab	PD-1	1	0	1	0	0	0	0	1	0	0	0	0	0	0	0	0	0	0	0	0	134	153	4.83	0.45	1.08	0.223602	3.13	0.648033	124.074	2.89815
60010357727	3e4fe3c5580d01f9e7fd6b879266e89e	adenocarcinoma	0	0	no	128.857	0	no	female	57	66	169	23.1084	0	0	0	ICI	Tislelizumab	PD-1	0	0	0	0	0	0	0	0	0	0	0	0	0	0	0	0	0	0	0	0	146	116	5.12	0.41	1.15	0.224609	3.53	0.689453	126.957	3.06957
60010359883	afc4b87b3d3975a80dea9d58c280cb8f	SCC	0	0	no	150.857	0	no	female	61	67	156	27.6545	0	0	0	ICI+chemotherapy	Pembrolizumab	PD-1	1	0	1	0	0	0	0	0	1	0	0	0	0	0	0	0	0	0	0	0	243	115	6.71	0.38	2.41	0.359165	3.8	0.566319	100.83	1.57676
60010360459	8080a9a388d3c06901740d8a56398950	adenocarcinoma	0	0	no	121	0	no	male	60	68	160	26.3672	0	0	0	ICI+chemotherapy	Sintilimab	PD-1	1	1	0	0	0	0	0	0	0	0	0	0	0	0	0	0	0	0	0	0	190	4	6.19	0.37	1.79	0.289176	3.93	0.634895	106.145	2.19553
60010360509	cd4a46fdb246c601a8ace0cd7011aa84	adenocarcinoma	0	0	no	91.2857	0	no	male	66	89	173	29.737	1	0	0	ICI+chemotherapy	Pembrolizumab	PD-1	1	0	1	0	0	0	0	0	0	0	0	0	0	0	0	0	0	0	1	0	223	123	7	0.52	1.48	0.211429	4.78	0.682857	150.676	3.22973
60010361969	0364ebc360ac93b5bd8df34d3ad3650c	adenocarcinoma	0	0	no	137.571	0	no	male	71	64	170	22.1453	1	0	0	ICI+chemotherapy	Tislelizumab	PD-1	1	1	1	0	0	0	0	1	0	0	0	0	0	0	0	0	0	0	0	0	208	127	8.64	0.82	1.34	0.155093	6.1	0.706019	155.224	4.55224
60010363035	b752d19c5dda3ccde3343658b8992ad1	SCLC	0	0	no	151.143	0	no	male	65	74	172	25.0135	1	1	0	ICI+chemotherapy+antiangiogenic_therapy	Atezolizumab	PD-L1	1	0	0	0	1	0	1	0	0	0	0	0	0	1	0	1	0	0	1	0	292	138	10.08	0.41	1.14	0.113095	8.51	0.844246	256.14	7.46491
60010371962	9ad109df5f07d434e9f094fb6659f969	SCC	0	0	no	128.714	0	no	male	56	60	167	21.5139	1	0	0	ICI	Tislelizumab	PD-1	0	0	0	0	0	0	0	0	0	0	0	0	0	0	0	0	0	0	0	0	278	117	4.66	0.64	1.45	0.311159	2.24	0.480687	191.724	1.54483
60010372868	88fbaf0770d9d855068412f173cae5dd	adenocarcinoma	0	0	no	97.1429	0	no	male	67	80	186	23.1241	1	0	0	ICI+chemotherapy	Pembrolizumab	PD-1	1	1	0	0	0	0	1	0	0	0	0	0	0	0	0	0	0	0	0	0	145	136	6.27	0.49	1.72	0.274322	3.96	0.631579	84.3023	2.30233
60010383080	6d58e82bf58500b0f88883408146fa9e	SCLC	0	0	no	110.714	0	no	male	59	71	170	24.5675	1	1	0	ICI+antiangiogenic_therapy	Durvalumab	PD-L1	0	0	0	0	0	0	0	0	0	0	0	0	0	1	0	1	0	0	0	0	176	91	5.91	0.43	1.11	0.187817	4.22	0.714044	158.559	3.8018
60010397242	c7d8bfa50cbde96e6fff1457ad824469	SCC	0	0	no	151.429	0	no	male	68	70	179	21.847	1	1	0	ICI+chemotherapy	Tislelizumab	PD-1	1	0	1	0	0	0	1	0	0	0	0	0	0	0	0	0	0	0	0	0	136	122	2.99	0.2	0.59	0.197324	2.1	0.702341	230.508	3.55932
60010398945	695fa7fb674fad08888a5aa1256c94b4	adenocarcinoma	0	0	no	147.714	0	no	male	58	64	166	23.2254	0	0	0	ICI+chemotherapy	Camilizumab	PD-1	1	1	0	0	0	0	0	0	1	0	0	0	0	0	0	0	0	0	0	0	202	131	8.15	0.73	1.62	0.198773	5.6	0.687117	124.691	3.45679
60010401297	f59b017c74a1b0deb7868ce85ea80673	adenocarcinoma	0	0	no	144.429	0	no	male	68	78	175	25.3061	0	0	0	ICI+chemotherapy	Pembrolizumab	PD-1	1	1	0	0	0	0	0	0	0	0	0	0	0	0	0	0	0	0	0	0	367	109	7.5	0.68	2.36	0.314667	4.25	0.566667	155.508	1.80085
60010407944	96fbd5c9214f1bd2daa6ab16149e0b88	SCC	0	0	no	152.429	0	no	male	60	64	169	22.4082	0	0	0	ICI+chemotherapy	Durvalumab	PD-L1	1	0	0	0	1	0	1	0	1	0	0	0	0	0	0	0	0	0	0	0	121	133	5.6	0.38	1.45	0.258929	3.19	0.569643	83.4483	2.2
60010412459	e07733f0f8687638fbaf3b781d0c1123	SCC	0	0	no	148	0	no	male	61	56	160	21.875	1	1	0	ICI+chemotherapy	Tislelizumab	PD-1	1	0	1	0	0	0	0	1	0	0	0	0	0	0	0	0	0	0	0	0	223	119	6.36	0.43	1.17	0.183962	4.74	0.745283	190.598	4.05128
60010415739	5d8d30e76eb72cdd47d093e6e5685c2c	SCC	0	0	no	104.857	0	no	female	53	60	168	21.2585	0	0	0	ICI+chemotherapy	Tislelizumab	PD-1	1	0	1	0	0	0	0	1	0	0	0	0	0	0	0	0	0	0	0	0	290	114	3.14	0.44	1.26	0.401274	1.42	0.452229	230.159	1.12698
60010421373	181625e62aa3b4072779948a6722ea4c	SCC	0	0	no	140.571	0	no	male	77	43	150	19.1111	1	0	0	ICI+chemotherapy	Tislelizumab	PD-1	1	0	1	0	0	0	0	0	0	0	0	0	0	0	0	0	0	0	0	0	422	114	11.04	1	1.63	0.147645	7.79	0.705616	258.896	4.77914
60010423237	c006a8d577f61eb18ab32f20699cd3ac	SCC	0	0	no	151.571	0	no	male	65	65	168	23.03	1	1	0	ICI+chemotherapy+antiangiogenic_therapy	Tislelizumab	PD-1	1	0	1	1	0	0	0	1	0	0	0	0	0	1	0	0	1	0	0	0	179	128	5.48	0.34	1.11	0.202555	4	0.729927	161.261	3.6036
60010430643	7f5947e7604600f9be161aa596d55338	adenocarcinoma	1	1	Arrhythmia	7	1	First-Degree Atrioventricular Block (First-Degree AV Block)	male	72	64	165	23.5078	1	1	0	ICI+chemotherapy	Camilizumab	PD-1	1	1	0	0	0	0	0	0	1	0	0	0	0	0	0	0	0	0	0	0	557	108	8.54	0.64	1.63	0.190867	6.19	0.724824	341.718	3.79755
60010433555	3e0458144f77b919047e9229bc2a24c8	adenocarcinoma	0	0	no	151.143	0	no	male	58	72	179	22.4712	1	1	0	ICI+chemotherapy	Pembrolizumab	PD-1	1	0	1	1	0	0	0	1	0	0	0	0	0	0	0	0	0	0	0	0	217	150	5.5	0.41	1.61	0.292727	3.39	0.616364	134.783	2.10559
60010449412	54d1242aaedb8e5e9d9aa1e5004b8dd7	adenocarcinoma	0	0	no	93.4286	0	no	female	69	45	150	20	0	0	0	ICI+chemotherapy+antiangiogenic_therapy	Durvalumab	PD-L1	1	0	1	0	0	0	0	0	0	0	0	0	0	1	1	0	0	0	0	0	137	87	3.9	0.49	0.68	0.174359	2.67	0.684615	201.471	3.92647
60010465142	aac5c239913e45cd0825b32f3a806312	NET	0	0	no	148.857	0	no	male	67	77	175	25.1429	1	1	0	ICI+chemotherapy+antiangiogenic_therapy	Durvalumab	PD-L1	1	0	0	0	1	0	1	0	0	0	0	0	0	1	0	1	0	0	0	0	236	131	5.18	0.79	0.95	0.183398	3.44	0.664093	248.421	3.62105
60010467028	7dfa8c8587ac374670a36798913569bd	NET	0	0	no	120.714	0	no	male	51	40	162	15.2416	0	0	0	ICI	Tislelizumab	PD-1	0	0	0	0	0	0	0	0	0	0	0	0	0	0	0	0	0	0	0	0	271	91	7.68	1.56	0.98	0.127604	6.1	0.794271	276.531	6.22449
60010467282	f30f6c6e9822ae1cbe192aa7797d4f8c	SCC	0	0	no	148.286	0	no	male	74	59	166	21.4109	0	0	0	ICI+chemotherapy	Pembrolizumab	PD-1	1	0	0	0	0	1	0	0	0	0	0	0	0	0	0	0	0	0	0	0	287	112	7.83	0.3	1.13	0.144317	6.37	0.813538	253.982	5.63717
60010467781	5380700dc3aa40001ad9250a032daef6	adenocarcinoma	0	0	no	148.571	0	no	male	76	56	170	19.3772	1	0	0	ICI+chemotherapy	Tislelizumab	PD-1	1	0	0	0	0	0	0	1	0	0	0	0	0	0	0	0	0	0	0	0	217	133	6.01	0.56	1.4	0.232945	4	0.665557	155	2.85714
60010477995	323ce1a7fbf09219afa6cba19eabada4	adenocarcinoma	0	0	no	147.857	0	no	male	56	95	178	29.9836	1	1	0	ICI+chemotherapy	Atezolizumab	PD-L1	1	0	0	0	1	0	0	1	0	0	0	0	0	0	0	0	0	0	0	0	469	110	6.81	0.69	2.02	0.296623	3.8	0.558003	232.178	1.88119
60010484895	5c3ae3c3c540cdc6615c4d7de382f730	adenocarcinoma	0	0	no	76.4286	0	no	male	68	60	156	24.6548	1	0	0	ICI+chemotherapy	Pembrolizumab	PD-1	1	1	0	0	0	0	0	1	0	0	0	0	0	0	0	0	0	0	1	0	192	144	5.66	0.5	1.18	0.208481	3.85	0.680212	162.712	3.26271
60010502806	c2d7370de2976e79cbde206b0a0a7093	SCLC	0	0	no	143.857	0	no	male	65	63	167	22.5896	1	0	0	ICI+chemotherapy	Pembrolizumab	PD-1	1	0	1	0	0	0	0	1	0	0	0	0	0	0	0	0	0	0	0	0	244	126	5.86	0.6	1.04	0.177474	4.07	0.694539	234.615	3.91346
60010505588	386c38ba6d6e97355a00ff7e6b98cce2	SCC	0	0	no	110.857	0	no	male	73	65	167	23.3067	1	0	0	ICI+chemotherapy	Tislelizumab	PD-1	1	0	1	0	0	0	0	1	0	0	0	0	0	0	0	0	0	0	0	0	199	124	8.89	1.14	0.97	0.109111	6.16	0.692913	205.155	6.35052
60010522678	62f7f0933f8a38f13c05ca06b3669d1c	SCC	0	0	no	138.857	0	no	male	67	60	157	24.3418	0	0	1	ICI+chemotherapy	Camilizumab	PD-1	1	0	0	1	0	0	0	1	0	0	0	0	0	0	0	0	0	0	1	1	351	124	5.97	0.72	0.67	0.112228	4.43	0.742044	523.881	6.61194
60010525361	bb8d008fc3e983e2f0ba7c6eea562dc5	SCLC	0	0	no	144.429	0	no	male	65	75	170	25.9516	1	0	0	ICI+chemotherapy	Durvalumab	PD-L1	1	0	0	0	1	1	0	1	0	0	0	0	0	0	0	0	0	0	0	0	169	152	4.25	0.42	0.91	0.214118	2.77	0.651765	185.714	3.04396
60010525814	bc8bd357b954f8a82bb6d92cecc6373f	SCLC	0	0	no	109.571	0	no	male	59	67	164	24.9108	0	0	0	ICI+chemotherapy	Pembrolizumab	PD-1	1	0	0	1	0	0	0	1	0	0	0	0	0	0	0	0	0	0	1	0	280	145	5.44	0.43	1.62	0.297794	3.3	0.606618	172.84	2.03704
60010528086	5b2fae0df8dcb08f6dfa69af6462debb	SCC	0	0	no	137.714	0	no	male	56	72	178	22.7244	1	0	0	ICI+chemotherapy+antiangiogenic_therapy	Tislelizumab	PD-1	1	1	0	0	0	0	0	1	0	0	0	0	0	1	1	0	0	0	0	0	166	127	7.13	0.74	1.41	0.197756	4.84	0.678822	117.73	3.43262
60010532518	d413ef6dfd93cc50750bd9d689a328be	SCC	1	1	Myocarditis	6	0	no	male	35	60	175	19.5918	1	0	0	ICI+chemotherapy+antiangiogenic_therapy	Pembrolizumab	PD-1	1	1	1	0	0	0	1	1	0	0	0	0	0	1	0	1	1	0	0	0	342	148	8.45	0.67	1.2	0.142012	6.45	0.763314	285	5.375
60010534355	a4b4b364843f8bd8d94aa38e498c8689	SCC	0	0	no	143.714	0	no	male	69	85	177	27.1314	1	1	0	ICI	Tislelizumab	PD-1	0	0	0	0	0	0	0	0	0	0	0	0	0	0	0	0	0	0	1	1	348	122	9.93	0.78	1.29	0.129909	7.05	0.70997	269.767	5.46512
60010537886	cd29d9b8486846e8220f6a4c7887bcee	SCLC	0	0	no	124	0	no	female	58	55	164	20.4491	0	0	0	ICI	Durvalumab	PD-L1	0	0	0	0	0	0	0	0	0	0	0	0	0	0	0	0	0	0	0	0	228	119	3.96	0.36	0.96	0.242424	2.38	0.60101	237.5	2.47917
60010540439	7170d8849813f47b28e47e021f4df1e1	adenocarcinoma	0	0	no	140	0	no	male	54	58	172	19.6052	1	0	0	ICI	Tislelizumab	PD-1	0	0	0	0	0	0	0	0	0	0	0	0	0	0	0	0	0	0	0	0	145	132	7.4	0.73	1.53	0.206757	4.91	0.663514	94.7712	3.20915
60010541268	d1d6ff1f28d2c02b33528ce2cdd11012	LCC	0	0	no	139.714	0	no	male	66	51	166	18.5078	0	0	0	ICI+chemotherapy	Camilizumab	PD-1	1	1	0	0	0	0	1	0	0	0	0	0	0	0	0	0	0	0	0	0	258	122	13.55	1.71	2.65	0.195572	9.05	0.667897	97.3585	3.41509
60010541336	ba7ced698997addecb9d22ef63792c67	adenocarcinoma	0	0	no	116.714	0	no	male	50	68	174	22.46	0	0	0	ICI+chemotherapy	Camilizumab	PD-1	1	1	0	0	0	0	1	0	0	0	0	0	0	0	0	0	0	0	0	0	193	11	4.89	0.59	1.15	0.235174	3.03	0.619632	167.826	2.63478
60010545194	e9456cf9327923eb38a3f862125571fd	adenocarcinoma	0	0	no	81.5714	0	no	male	56	86	179	26.8406	1	1	0	ICI+chemotherapy+antiangiogenic_therapy	Camilizumab	PD-1	1	1	1	0	0	0	0	0	0	0	0	0	0	1	0	1	0	0	1	0	286	149	7.86	0.6	2.12	0.26972	4.83	0.614504	134.906	2.2783
60010546070	53d2f77aea2c2ecb6926019b79323ae2	adenocarcinoma	0	0	no	139.857	0	no	male	70	56	159	22.151	1	1	1	ICI+chemotherapy	Pembrolizumab	PD-1	1	1	0	0	0	0	1	0	0	0	0	0	0	0	0	0	0	0	1	0	265	170	7.27	0.41	2.22	0.305365	4.32	0.594223	119.369	1.94595
60010548134	ad8b6835443fd55f940e0b2661ce703b	SCC	0	0	no	120.714	0	no	male	67	60	159	23.7332	1	0	0	ICI	Durvalumab	PD-L1	0	0	0	0	0	0	0	0	0	0	0	0	0	0	0	0	0	0	0	0	231	127	8.17	1.11	1.23	0.150551	4.814	0.589229	187.805	3.91382
60010562656	8465b46fda0a8a732186bee482d3e246	SCC	0	0	no	133.429	0	no	male	65	59	159	23.3377	0	0	0	ICI+chemotherapy	Tislelizumab	PD-1	1	0	0	1	0	0	0	1	0	0	0	0	0	0	0	0	0	0	0	0	282	109	4.98	0.65	1.25	0.251004	3	0.60241	225.6	2.4
60010565660	0d417c669adc9e982822d50ceaba7090	SCLC	0	0	no	109.286	0	no	male	72	53	156	21.7784	1	1	0	ICI+chemotherapy	Sintilimab	PD-1	1	0	1	0	0	0	0	1	0	0	0	0	0	0	0	0	0	0	1	0	540	108	13.39	1.3	2.29	0.171023	9.52	0.710978	235.808	4.15721
60010576515	86c68d29138227e9d885f021c91d1ef8	SCC	0	0	no	141.286	0	no	male	64	65	175	21.2245	1	1	0	ICI+chemotherapy	Camilizumab	PD-1	1	0	1	0	0	0	0	0	0	0	0	0	0	0	0	0	0	0	0	0	225	110	8.04	0.63	1.69	0.210199	5.47	0.680348	133.136	3.23669
60010576553	620b5349909564f0b030cdcee0c80679	SCLC	0	0	no	87.8571	0	no	male	73	61	163	22.9591	1	0	0	ICI+chemotherapy+antiangiogenic_therapy	Durvalumab	PD-L1	1	0	0	0	1	0	1	0	0	0	0	0	0	1	0	1	0	0	1	0	279	114	7.08	0.79	1.11	0.15678	4.65	0.65678	251.351	4.18919
60010590638	94a8b66807f8c140abe84e843e9bfa92	adenocarcinoma	0	0	no	135.429	0	no	female	57	43	154	18.1312	0	0	0	ICI+chemotherapy+antiangiogenic_therapy	Tislelizumab	PD-1	1	1	0	0	0	0	1	1	0	0	0	0	0	1	1	0	0	0	0	0	289	140	4.09	0.32	1.45	0.354523	2.26	0.552567	199.31	1.55862
60010592164	fedc828832a37948211755f69867478b	adenocarcinoma	0	0	no	129.714	0	no	male	75	62	153	26.4855	1	0	0	ICI+chemotherapy	Pembrolizumab	PD-1	1	1	1	0	0	0	0	1	1	0	0	0	0	0	0	0	0	0	0	0	273	123	3.54	0.77	1.1	0.310734	1.46	0.412429	248.182	1.32727
60010594318	336ebb666c01f4eca44d73d63ad5f8e4	adenocarcinoma	0	0	no	134.857	0	no	male	59	84	166	30.4834	1	1	0	ICI+chemotherapy	Sintilimab	PD-1	1	1	1	0	0	0	0	1	0	0	0	0	0	0	0	0	0	0	0	0	359	138	9.81	0.66	1.37	0.139653	7.53	0.767584	262.044	5.49635
60010599388	d9cb7b0e15c2d90f490761cad1f6f67e	SCC	0	0	no	71.8571	0	no	male	52	66	163	24.841	1	0	0	ICI+chemotherapy	Tislelizumab	PD-1	1	0	1	0	0	0	0	0	1	0	0	0	0	0	0	0	0	0	0	0	222	118	5.73	0.6	1.3	0.226876	3.55	0.619546	170.769	2.73077
60010605659	cf72f31575ba23621e626daeecbb4d23	SCC	0	0	no	139.286	0	no	male	66	67	174	22.1297	0	0	0	ICI+chemotherapy	Camilizumab	PD-1	1	0	1	0	0	0	0	1	0	0	0	0	0	0	0	0	0	0	0	0	193	136	6.4	0.51	1.51	0.235937	4	0.625	127.815	2.64901
60010612235	6c122bce371b71f16141d5548cce0574	adenocarcinoma	0	0	no	32.4286	0	no	female	55	58	157	23.5304	0	0	0	ICI+chemotherapy	Tislelizumab	PD-1	1	1	0	0	0	0	0	0	1	0	0	0	0	0	0	0	0	0	1	0	260	130	3.31	0.38	0.75	0.226586	2.14	0.646526	346.667	2.85333
60010614939	07ebbdf99e8e30d8c3c33972203b3af2	adenocarcinoma	0	0	no	138.571	0	no	male	56	50	156	20.5457	1	0	0	ICI+chemotherapy	Sintilimab	PD-1	1	0	0	1	0	0	1	1	0	0	0	0	0	0	0	0	0	0	0	0	295	107	5.45	0.53	1.35	0.247706	3.44	0.631193	218.519	2.54815
60010619011	fa4c84ac370b25bf9081eabd31b55bf2	adenocarcinoma	0	0	no	138.571	0	no	female	43	63	158	25.2363	0	0	0	ICI+chemotherapy	Pembrolizumab	PD-1	1	0	1	0	0	0	0	1	0	0	0	0	0	0	0	0	0	0	0	0	212	114	7.78	0.48	1.34	0.172237	5.74	0.737789	158.209	4.28358
60010624402	830c74b9493ea820ba537e877f74803e	SCC	0	0	no	137.571	0	no	male	63	47	173	15.7372	1	1	0	ICI+chemotherapy	Sintilimab	PD-1	1	0	1	0	0	0	0	1	0	0	0	0	0	0	0	0	0	0	1	0	274	153	6.23	0.46	1.56	0.250401	3.81	0.611557	175.641	2.44231
60010625259	a8e1cc620df014db70ec858cf1cfae2e	SCLC	0	0	no	132.143	0	no	male	63	65	147	30.0801	1	0	0	ICI+chemotherapy	Durvalumab	PD-L1	1	0	0	0	1	0	0	1	0	0	0	0	0	0	0	0	0	0	0	0	342	143	7.03	0.42	1.8	0.256046	4.7	0.668563	190	2.61111
60010639590	e0c8f1e90a884885fcbdff24befb0cc0	SCC	0	0	no	136.714	0	no	male	68	70	169	24.5089	1	1	0	ICI+chemotherapy	Camilizumab	PD-1	1	0	1	0	0	0	1	0	0	0	0	0	0	0	0	0	0	0	0	0	198	102	3.9	0.11	0.78	0.2	2.94	0.753846	253.846	3.76923
60010642209	dc2792d8fe4851a5639d074f4b7cf0dd	SCC	0	0	no	137	0	no	male	56	75	163	28.2284	1	1	0	ICI+chemotherapy	Tislelizumab	PD-1	1	0	1	0	0	0	0	1	0	0	0	0	0	0	0	0	0	0	0	0	327	108	7.99	0.75	1.54	0.192741	5.37	0.67209	212.338	3.48701
60010642874	a7a47916ed3546f1980e57168ba0eee0	adenocarcinoma	0	0	no	129.429	0	no	female	68	63	165	23.1405	0	0	0	ICI+chemotherapy	Pembrolizumab	PD-1	1	1	1	0	0	0	0	1	0	0	0	0	0	0	0	0	0	0	0	0	323	115	4	0.35	0.91	0.2275	2.69	0.6725	354.945	2.95604
60010648084	bb8b78422f69106204ea39ad6fc1bf0f	SCC	0	0	no	132.571	0	no	male	62	47	157	19.0677	0	0	0	ICI+chemotherapy	Camilizumab	PD-1	1	0	0	1	0	0	0	1	0	0	0	0	0	0	0	0	0	0	0	0	193	102	12.86	1.14	2.29	0.178072	9.1	0.707621	84.2795	3.9738
60010648110	3b4104481b059204746c9c58b0124e49	adenocarcinoma	0	0	no	133.571	0	no	female	55	63	170	21.7993	0	0	0	ICI+chemotherapy+antiangiogenic_therapy	Pembrolizumab	PD-1	1	1	1	1	0	0	0	0	1	0	0	0	0	1	0	1	0	0	0	0	185	172	9.81	0.57	2.21	0.22528	6.9	0.703364	83.7104	3.12217
60010655955	cd96e3043bceb21c77c881f2b340a0a5	SCC	1	1	Arrhythmia	3	1	ST-Segment Change	male	48	63	180	19.4444	0	0	1	ICI+chemotherapy+antiangiogenic_therapy	Pembrolizumab	PD-1	1	0	1	1	0	0	0	1	1	0	0	0	0	1	0	1	0	0	0	0	365	151	8.57	0.45	2.38	0.277713	5.48	0.63944	153.361	2.30252
60010655956	675072b780f8f2bcbe7d6ee07269460b	SCLC	0	0	no	80.2857	0	no	male	68	55	162	20.9572	1	1	0	ICI+chemotherapy+antiangiogenic_therapy	Tislelizumab	PD-1	1	0	0	0	0	1	0	1	0	0	0	0	0	1	0	1	0	0	0	0	343	117	5	0.91	1.13	0.226	2.74	0.548	303.54	2.42478
60010658629	63d99b45852e1d4c16aada921214dc3a	adenocarcinoma	1	1	Myocarditis	22	0	no	male	67	67	178	21.1463	0	0	0	ICI+chemotherapy+antiangiogenic_therapy	Pembrolizumab	PD-1	1	1	0	0	0	0	1	1	0	0	0	0	0	1	0	1	0	0	0	0	634	141	21.06	0.32	1.22	0.0579297	19.46	0.924027	519.672	15.9508
60010661640	877eaa1b2ebfc6bf81a672729c5e90fc	SCC	0	0	no	125.286	0	no	male	67	78	185	22.7027	0	0	0	ICI+chemotherapy	Atezolizumab	PD-L1	1	0	0	0	1	0	0	1	0	0	0	0	0	0	0	0	0	0	0	0	122	105	5.12	0.41	1.46	0.285156	3.17	0.619141	83.5616	2.17123
60010669383	70c3736bd3b4a1cdcd68d2371195de97	SCC	0	0	no	73.7143	0	no	female	58	61	150	27.1111	0	0	0	ICI+chemotherapy	Camilizumab	PD-1	1	1	0	0	0	0	0	0	1	0	0	0	0	0	0	0	0	0	0	0	256	128	5.99	0.33	1.32	0.220367	4.13	0.689482	193.939	3.12879
60010671208	1b9f8df9432be11a40fd98fc8c618dec	SCC	0	0	no	122.286	0	no	male	76	59	169	20.6575	1	0	0	ICI+chemotherapy+antiangiogenic_therapy	Tislelizumab	PD-1	1	1	0	0	0	0	0	0	0	0	0	0	0	1	0	0	1	0	0	0	504	95	8.62	0.62	1.3	0.150812	6.43	0.74594	387.692	4.94615
60010682389	ac8a4da7fee7a18dec240ba389d89f6b	SCC	0	0	no	134	0	no	male	70	54	168	19.1327	0	0	0	ICI+chemotherapy+antiangiogenic_therapy	Pembrolizumab	PD-1	1	1	0	0	0	0	1	1	1	0	0	0	0	1	1	0	0	0	0	0	422	154	8.26	0.73	2.36	0.285714	5.01	0.606538	178.814	2.12288
60010699231	6398d4cf7637d16036306cec93acdf20	SCC	0	0	no	120.571	0	no	male	71	66	166	23.9512	1	0	0	ICI+chemotherapy	Sintilimab	PD-1	1	0	1	0	0	0	0	1	0	0	0	0	0	0	0	0	0	0	1	0	193	123	8.34	0.63	2.19	0.26259	4.89	0.586331	88.1279	2.23288
60010700732	b919e0a85a2f4a0c6d7fab131d89c875	adenocarcinoma	0	0	no	130.429	0	no	female	60	49	148	22.3703	0	0	0	ICI+chemotherapy	Camilizumab	PD-1	1	1	0	0	0	0	0	0	1	0	0	0	0	0	0	0	0	0	0	0	92	123	7.18	0.34	1.4	0.194986	4.91	0.683844	65.7143	3.50714
60010706294	9dcb496d7c2c85ca263c7007069f6c6f	adenocarcinoma	0	0	no	76.7143	0	no	male	62	65	174	21.4692	1	1	0	ICI+antiangiogenic_therapy	Tislelizumab	PD-1	0	0	0	0	0	0	0	0	0	0	0	0	0	1	0	1	1	0	1	0	99	65	7.65	0.46	0.91	0.118954	6.19	0.80915	108.791	6.8022
60010710961	2f0cbbbd43ca6674dffb03fc3f75359f	SCLC	0	0	no	133.286	0	no	male	55	53	160	20.7031	1	0	0	ICI+chemotherapy	Atezolizumab	PD-L1	1	0	0	0	1	0	1	0	0	0	0	0	0	0	0	0	0	0	0	0	361	126	9.09	0.71	1.52	0.167217	5.93	0.652365	237.5	3.90132
60010719709	b721681fc5b071c25fb9af4b8fc1eb15	SCLC	0	0	no	125.857	0	no	male	64	84	169	29.4107	0	0	0	ICI+chemotherapy	Tislelizumab	PD-1	1	0	1	1	0	0	0	1	0	0	0	0	0	0	0	0	0	0	0	0	203	127	6.66	0.57	1.13	0.16967	4.84	0.726727	179.646	4.28319
60010751454	d2bc2ffd2fc5bb53a5aa009b26e67044	adenocarcinoma	0	0	no	124.429	0	no	male	80	49	165	17.9982	0	0	0	ICI+chemotherapy	Sintilimab	PD-1	1	1	0	0	0	0	0	0	0	0	0	0	0	0	0	0	0	0	1	0	252	120	7.24	0.62	1.2	0.165746	5.25	0.725138	210	4.375
60010781897	44062b372f0f78398c665bc839640342	SCC	0	0	no	126	0	no	male	69	67	166	24.3141	1	0	0	ICI+chemotherapy	Tislelizumab	PD-1	1	0	1	0	0	0	0	0	0	0	0	0	0	0	0	0	0	0	0	0	182	144	7.98	0.71	1.52	0.190476	5.62	0.704261	119.737	3.69737
60010783382	89c02c5caa4b7a5c1128080066c2afc6	adenocarcinoma	0	0	no	74.8571	0	no	male	41	62	173	20.5486	0	1	0	ICI+chemotherapy	Sintilimab	PD-1	1	1	0	0	0	0	0	0	1	0	0	0	0	0	0	0	0	0	0	0	171	105	12.91	1.23	0.95	0.0735864	10.68	0.827266	180	11.2421
60010784442	7d5b133bca95286547ca88e1fdf90501	SCC	0	0	no	124.143	0	no	male	68	48	165	17.6309	1	1	0	ICI+chemotherapy	Tislelizumab	PD-1	1	0	1	0	0	0	1	0	0	0	0	0	0	0	0	0	0	1	0	0	325	78	7.45	0.73	1.08	0.144966	5.36	0.719463	300.926	4.96296
60010786796	198ff18f62829d8565b488b73c957fee	SCLC	0	0	no	112.571	0	no	male	59	53	163	19.9481	0	0	0	ICI+chemotherapy	Durvalumab	PD-L1	1	0	0	0	0	1	1	0	0	0	0	0	0	0	0	0	0	0	0	0	244	121	5.31	0.46	0.64	0.120527	3.75	0.706215	381.25	5.85938
60010801072	d217283d23fb6bbb7c8fb8f1835defa8	SCC	1	1	Myocarditis	3	0	no	female	34	50	160	19.5312	0	0	0	ICI+chemotherapy	Tislelizumab	PD-1	1	0	1	0	0	1	0	1	1	0	0	0	0	0	0	0	0	0	0	0	215	106	5.07	0.34	0.65	0.128205	4.01	0.790927	330.769	6.16923
60010802388	75ab0a780e0d4aca87fa66d7a98ec159	SCC	0	0	no	121.143	0	no	male	61	58	168	20.5499	0	0	0	ICI+chemotherapy	Camilizumab	PD-1	1	0	0	0	1	0	0	1	0	0	0	0	0	0	0	0	0	0	0	0	388	98	14.74	1.37	1.82	0.123474	10.9	0.739484	213.187	5.98901
60010810325	a423f4971c4711bb4582b65614ec645c	adenocarcinoma	0	0	no	128.714	0	no	male	69	57	165	20.9366	1	1	0	ICI+chemotherapy	Sintilimab	PD-1	1	0	1	0	0	0	1	0	0	0	0	0	0	0	0	0	0	0	1	0	226	133	7.35	0.15	1.58	0.214966	5.45	0.741497	143.038	3.44937
60010812000	e5a12ddc55d39c04e18bff8d1278f6a6	adenocarcinoma	0	0	no	123.143	0	no	male	63	63	165	23.1405	1	0	0	ICI+chemotherapy+antiangiogenic_therapy	Camilizumab	PD-1	1	1	0	0	0	0	0	0	1	0	0	0	0	1	1	0	0	0	0	0	213	120	8.29	0.67	2.18	0.262967	5.3	0.639324	97.7064	2.43119
60010816019	44eba14f3504849f35bdb4c2740b534a	adenocarcinoma	0	0	no	122.571	0	no	male	52	80	170	27.6817	1	0	0	ICI+chemotherapy	Tislelizumab	PD-1	1	1	1	0	0	0	0	0	1	0	0	0	0	0	0	0	0	0	1	0	375	115	8.75	1	2	0.228571	5.43	0.620571	187.5	2.715
60010819107	ec5d6426a6b66239da6b59b2456355bb	SCLC	0	0	no	128.286	0	no	male	66	52	170	17.9931	0	0	0	ICI+chemotherapy+antiangiogenic_therapy	Atezolizumab	PD-L1	1	0	0	0	1	0	0	1	0	0	0	0	0	1	0	1	0	0	0	0	138	131	6.88	0.63	1.47	0.213663	4.59	0.667151	93.8776	3.12245
60010822053	0e54ba27b77c486f1446a183813296de	adenocarcinoma	0	0	no	77	0	no	female	65	44	169	15.4056	0	0	0	ICI+chemotherapy	Tislelizumab	PD-1	1	1	0	0	0	0	0	1	0	0	0	0	0	0	0	0	0	1	0	0	208	116	6.08	0.44	1.93	0.317434	3.6	0.592105	107.772	1.86528
60010826331	07bd15126462d2c13ad31c14299fe5c9	adenocarcinoma	0	0	no	54.2857	0	no	male	62	65	167	23.3067	0	0	0	ICI	Tislelizumab	PD-1	0	0	0	0	0	0	0	0	0	0	0	0	0	0	0	0	0	0	0	0	221	93	14.24	1.53	0.97	0.068118	11.39	0.79986	227.835	11.7423
60010832547	2c93d7fe5fc695aa57659b4c580eae52	SCC	0	0	no	119.286	0	no	male	65	63	164	23.4236	1	0	0	ICI+chemotherapy	Atezolizumab	PD-L1	1	0	1	0	0	0	0	0	0	0	0	0	0	0	0	0	0	0	1	0	232	144	8.66	0.6	1.97	0.227483	5.87	0.677829	117.766	2.9797
60010838089	e502d2dd3fcc6184bdb25fc669b331f8	adenocarcinoma	0	0	no	69.7143	0	no	male	64	62	173	20.7157	0	0	0	ICI+chemotherapy+antiangiogenic_therapy	Sintilimab	PD-1	1	1	0	0	0	0	0	1	0	0	0	0	0	1	1	0	0	0	0	0	191	135	6.58	0.46	0.9	0.136778	5.13	0.779635	212.222	5.7
60010838856	d4c8bb34dc06b6157c4f6577d0db4ce0	adenocarcinoma	0	0	no	117.857	0	no	male	62	62	163	23.3355	0	0	1	ICI+chemotherapy	Tislelizumab	PD-1	1	0	1	0	0	0	0	0	0	0	0	0	0	0	0	0	0	0	1	0	377	94	14.28	0.76	1.06	0.0742297	12.37	0.866246	355.66	11.6698
60010839286	4ce773cfa39e2fc054358e53928fe11e	NET	0	0	no	117.714	0	no	male	68	67	167	24.0238	0	0	0	ICI+chemotherapy	Tislelizumab	PD-1	1	0	0	0	1	0	0	1	0	0	0	0	0	0	0	0	0	0	0	0	207	155	6.34	0.52	1.81	0.285489	3.86	0.608833	114.365	2.1326
60010840683	d0145312a86af041c45a566e490dacbf	adenocarcinoma	0	0	no	88	0	no	female	73	54	160	20.957	0	0	0	ICI+chemotherapy+antiangiogenic_therapy	Pembrolizumab	PD-1	1	1	0	0	0	0	0	0	1	0	0	0	0	1	1	0	0	0	0	0	169	132	7.64	0.37	2.89	0.378272	4.27	0.558901	58.4775	1.47751
60010843464	eabf3e07d978e273abc585b10bc8b0a8	adenocarcinoma	0	0	no	74	0	no	female	67	49	155	20.3954	0	0	0	ICI+antiangiogenic_therapy	Tislelizumab	PD-1	0	0	0	0	0	0	0	0	0	0	0	0	0	1	1	1	0	0	0	0	357	83	12.07	0.82	1.48	0.122618	9.55	0.791218	241.216	6.4527
60010853220	f15971c202605b3d7a9463582dfdb083	SCC	0	0	no	75.4286	0	no	male	61	60	170	20.7612	1	1	0	ICI+chemotherapy	Tislelizumab	PD-1	1	0	0	0	1	0	1	0	0	0	0	0	0	0	0	0	0	0	0	0	219	129	5.19	0.22	1.7	0.327553	3.15	0.606936	128.824	1.85294
60010855100	6a874b3f18b604bda145d8530f717074	adenocarcinoma	0	0	no	83.2857	0	no	female	68	71	172	23.9995	0	0	0	ICI+chemotherapy	Camilizumab	PD-1	1	1	0	0	0	0	0	0	1	0	0	0	0	0	0	0	0	0	1	0	211	113	4.83	0.24	1.78	0.36853	2.69	0.556936	118.539	1.51124
60010877619	58226aa2ca43c8279c5ab6df30ba32f8	SCC	0	0	no	125.857	0	no	male	71	50	160	19.5312	1	1	0	ICI+chemotherapy	Sintilimab	PD-1	1	0	0	1	0	0	0	1	0	0	0	0	0	0	0	0	0	0	0	0	361	114	9.78	0.77	1.06	0.108384	7.75	0.792434	340.566	7.31132
60010878899	e9c9ea647369a2ed4d2f86be9928d06c	adenocarcinoma	1	1	Arrhythmia	24	1	Left Anterior Fascicular Block (LAFB)	male	68	67	173	22.3863	1	1	0	ICI+antiangiogenic_therapy	Pembrolizumab	PD-1	0	0	0	0	0	0	0	0	0	0	0	0	0	1	0	1	0	0	1	0	482	107	12.2	1.03	1.73	0.141803	8.69	0.712295	278.613	5.02312
60010885291	366fcc3f437b5db04db3fdcf5249f0d5	adenocarcinoma	0	0	no	42.4286	0	no	male	60	69	160	26.9531	0	0	0	ICI+chemotherapy	Pembrolizumab	PD-1	1	1	0	0	0	0	1	0	0	0	0	0	0	0	0	0	0	0	0	0	366	154	10.43	1.13	1.43	0.137105	7.34	0.703739	255.944	5.13287
60010885399	bed21a749f71be31a68665c6aff510e3	adenocarcinoma	0	0	no	82.4286	0	no	male	64	75	168	26.5731	1	1	0	ICI+chemotherapy	Tislelizumab	PD-1	1	0	0	0	0	0	0	0	1	0	0	0	0	0	0	0	0	0	1	0	203	103	7.16	0.65	0.49	0.0684358	5.95	0.831006	414.286	12.1429
60010897233	5855b11b7f4bc4a7c102a6d23e29d7b9	SCC	0	0	no	79.8571	0	no	male	66	49	163	18.4425	1	1	0	ICI+antiangiogenic_therapy	Sintilimab	PD-1	0	0	0	0	0	0	0	0	0	0	0	0	0	1	1	0	0	0	0	0	258	107	11.56	0.82	1.87	0.161765	8.72	0.754325	137.968	4.6631
60010900148	70c5864fd7d78474788cd6cf57fc53ee	adenocarcinoma	1	1	Myocarditis	12	0	no	female	83	38	147	17.5853	0	0	0	ICI+antiangiogenic_therapy	Pembrolizumab	PD-1	0	0	0	0	0	0	0	0	0	0	0	0	0	1	1	0	1	0	1	0	414	133	11.44	0.85	3.68	0.321678	6.58	0.575175	112.5	1.78804
60010907762	aa8e6a84cb33c08651b79224f850408b	SCC	0	0	no	124.571	0	no	male	51	79	177	25.2163	1	0	0	ICI+chemotherapy+antiangiogenic_therapy	Pembrolizumab	PD-1	1	1	0	0	0	0	0	1	0	0	0	0	0	1	1	0	0	0	0	0	261	159	11.74	0.21	3.62	0.308348	7.66	0.65247	72.0994	2.11602
60010910962	dcd6e1808fc8550a66e842dff285655a	adenocarcinoma	0	0	no	108.857	0	no	male	70	64	170	22.1453	1	0	0	ICI+chemotherapy	Sintilimab	PD-1	1	1	0	0	0	0	0	0	1	0	0	0	0	0	0	0	0	0	0	0	162	78	10.55	0.94	1.06	0.100474	8.52	0.807583	152.83	8.03774
60010914505	d561275fd55e673616d46dc561f5676a	SCC	0	0	no	114.571	0	no	male	69	70	168	24.8016	1	1	0	ICI+chemotherapy	Tislelizumab	PD-1	1	0	1	0	0	0	0	1	0	0	0	0	0	0	0	0	0	0	0	0	157	110	3.3	0.06	0.95	0.287879	2.26	0.684848	165.263	2.37895
60010917697	b61a7b6dc3f9ec94f925b745ce77ecf8	adenocarcinoma	1	1	Arrhythmia	14	1	Right Bundle Branch Block (RBBB)	male	72	76	170	26.2976	0	0	0	ICI+chemotherapy+antiangiogenic_therapy	Pembrolizumab	PD-1	1	1	0	0	0	0	0	0	0	0	0	0	0	1	0	0	1	0	0	0	275	114	15.95	1.3	2.72	0.170533	11.47	0.719122	101.103	4.21691
60010922345	52678ee59f93c6fd7c5d4d448ed1914a	SCC	0	0	no	112.429	0	no	male	62	82	173	27.3982	1	1	0	ICI+chemotherapy	Camilizumab	PD-1	1	0	1	0	0	0	1	1	0	0	0	0	0	0	0	0	0	0	0	0	426	83	7.12	0.67	1.25	0.175562	5.09	0.714888	340.8	4.072
60010934452	921b042f6572416d3293d6513f8e0a4b	SCLC	0	0	no	124	0	no	male	44	84	177	26.8122	1	0	0	ICI+chemotherapy	Durvalumab	PD-L1	1	0	0	0	1	1	1	1	0	0	0	0	0	0	0	0	0	0	0	0	182	142	7.98	0.9	2.54	0.318296	4.49	0.562657	71.6535	1.76772
60010935640	e4703b13877bd16f3b329eab0d8d2a81	SCLC	0	0	no	116.857	0	no	male	80	56	165	20.5693	1	0	1	ICI+chemotherapy	Durvalumab	PD-L1	1	0	0	0	1	0	0	1	0	0	0	0	0	0	0	0	0	0	0	0	271	140	9.16	0.99	1.31	0.143013	6.79	0.741266	206.87	5.18321
60010942380	e4c766241b668ee0845c4b46ce90a896	adenocarcinoma	0	0	no	30.4286	0	no	male	61	67	157	27.1816	1	1	0	ICI+chemotherapy	Tislelizumab	PD-1	1	1	0	0	0	0	0	1	0	0	0	0	0	0	0	0	0	0	0	0	464	95	8.67	0.87	1.63	0.188005	6.12	0.705882	284.663	3.7546
60010950883	5c80b38eeeff68abf13925284ab879ca	adenocarcinoma	0	0	no	120.571	0	no	male	61	70	168	24.8016	1	0	0	ICI+chemotherapy+antiangiogenic_therapy	Pembrolizumab	PD-1	1	1	1	0	0	0	1	1	0	0	0	0	0	1	1	0	0	0	1	0	255	154	8.63	0.37	1.97	0.228273	5.93	0.687138	129.442	3.01015
60010952696	2987aaa0612cc74d1c6f3439b47cc742	SCC	0	0	no	32.5714	0	no	male	73	60	162	22.8624	0	0	0	ICI	Tislelizumab	PD-1	0	0	0	0	0	0	0	0	0	0	0	0	0	0	0	0	0	0	0	1	200	120	8.21	0.64	0.97	0.118149	6.37	0.775883	206.186	6.56701
60010953529	88625ec6cb26550d8063bfde1188a368	SCC	0	0	no	114.429	0	no	male	71	48	163	18.0662	1	0	1	ICI	Tislelizumab	PD-1	0	0	0	0	0	0	0	0	0	0	0	0	0	0	0	0	0	0	0	0	247	115	4.08	0.37	1.3	0.318627	1.95	0.477941	190	1.5
60010953906	af587b46c9740813fd352e3e6f165841	SCC	0	0	no	48.4286	0	no	male	67	70	164	26.0262	1	1	0	ICI+chemotherapy	Tislelizumab	PD-1	1	0	1	0	0	0	1	0	0	0	0	0	0	0	0	0	0	0	1	0	248	131	8.54	0.67	1.9	0.222482	5.77	0.675644	130.526	3.03684
60010959235	27e54fdae384e968c1f837432676d581	adenocarcinoma	0	0	no	117.571	0	no	female	63	54	167	19.3625	0	0	0	ICI+chemotherapy	Tislelizumab	PD-1	1	0	1	0	0	0	0	1	0	0	0	0	0	0	0	0	0	0	0	0	120	117	4.87	0.39	2.15	0.441478	2.18	0.447639	55.814	1.01395
60010966664	129fd849832e72a21e022ecaf6b60994	adenocarcinoma	0	0	no	119.429	0	no	female	71	60	164	22.3081	0	0	0	ICI+chemotherapy	Sintilimab	PD-1	1	1	0	0	0	0	0	0	0	0	0	0	0	0	0	0	0	0	0	0	220	135	13.21	0.88	1.41	0.106737	10.58	0.800908	156.028	7.50355
60010969994	36c32509c3e02a1205bd5460bd01f406	SCC	0	0	no	115.286	0	no	male	60	65	166	23.5883	1	0	0	ICI+chemotherapy	Camilizumab	PD-1	1	1	0	0	0	0	0	0	1	0	0	0	0	0	0	0	0	0	0	0	237	120	8.44	0.56	1.24	0.146919	6.58	0.779621	191.129	5.30645
60010972646	ad025d554b3d971f4d76691385d994d4	SCLC	0	0	no	122.857	0	no	male	60	76	170	26.2976	1	0	0	ICI+chemotherapy	Tislelizumab	PD-1	1	0	0	0	1	0	1	0	0	0	0	0	0	0	0	0	0	0	0	0	456	117	5.78	0.24	1.17	0.202422	4.11	0.711073	389.744	3.51282
60010979067	89c8da50cd54ce71b081a68ca7f4ebce	adenocarcinoma	0	0	no	118.429	0	no	male	72	56	169	19.6072	1	1	0	ICI+chemotherapy	Pembrolizumab	PD-1	1	0	1	0	0	0	0	0	1	0	0	0	0	0	0	0	0	0	1	0	253	121	2.33	0.46	0.78	0.334764	1.01	0.433476	324.359	1.29487
60010983822	166d294839aa165519cb4bf4da456dbe	NET	0	0	no	52.4286	0	no	male	68	78	170	26.9896	1	0	0	ICI+chemotherapy	Durvalumab	PD-L1	1	0	0	0	1	1	0	0	1	0	0	0	0	0	0	0	0	0	1	0	79	103	3.53	0.34	0.27	0.0764873	2.88	0.815864	292.593	10.6667
60010984080	eb3fff6b2ee932a96519da5514e3e2d1	SCLC	0	0	no	122.571	0	no	male	73	60	170	20.7612	1	0	0	ICI+chemotherapy	Durvalumab	PD-L1	1	0	0	0	1	0	0	1	0	0	0	0	0	0	0	0	0	0	0	0	208	133	7.76	0.67	1.32	0.170103	5.55	0.715206	157.576	4.20455
60010988302	41f70c3c6688ce2179ff3c29584f45a4	SCC	0	0	no	118	0	no	male	74	60	160	23.4375	1	0	0	ICI+chemotherapy	Tislelizumab	PD-1	1	0	1	0	0	0	1	1	0	0	0	0	0	0	0	0	0	0	0	0	168	127	6.26	0.62	2.12	0.338658	3.15	0.503195	79.2453	1.48585
60010989859	ef004f8de9b36526ea0dff78e0e99080	SCC	0	0	no	30	0	no	male	53	73	172	24.6755	1	0	0	ICI+antiangiogenic_therapy	Sintilimab	PD-1	0	0	0	0	0	0	0	0	0	0	0	0	0	1	1	0	0	0	0	0	256	143	4.97	0.61	1.31	0.263581	2.93	0.589537	195.42	2.23664
60010995539	7a3b676d48d3be5f67e1add981abcaf5	sarcomatoid carcinoma	0	0	no	115.429	0	no	male	64	69	171	23.597	1	1	0	ICI+chemotherapy	Camilizumab	PD-1	1	0	0	1	0	0	0	0	0	0	0	0	0	0	0	0	0	1	1	0	143	127	6.18	0.41	1.82	0.294498	3.52	0.569579	78.5714	1.93407
60010996881	b5333cb4f14be18c581ee3f1f806be40	SCC	0	0	no	87.2857	0	no	male	58	79	169	27.6601	1	0	0	ICI+chemotherapy+antiangiogenic_therapy	Camilizumab	PD-1	1	1	1	0	0	0	0	0	1	0	0	0	0	1	0	1	0	0	0	0	228	140	7.92	0.69	1.87	0.236111	5.14	0.64899	121.925	2.74866
60011014979	28d34dc1265ea9c7d2ee57dd98fdc7df	SCC	0	0	no	116.857	0	no	male	70	60	167	21.5139	1	0	0	ICI+chemotherapy	Tislelizumab	PD-1	1	0	1	0	0	0	0	1	0	0	0	0	0	0	0	0	0	1	1	0	313	138	8.27	0.74	1.36	0.16445	5.52	0.667473	230.147	4.05882
60011018824	f389479121b9c6f4b4ca0dcb0744feea	SCC	0	0	no	116.571	0	no	male	57	66	165	24.2424	1	0	0	ICI+chemotherapy	Pembrolizumab	PD-1	1	0	1	1	0	0	0	1	0	0	0	0	0	0	0	0	0	0	0	0	292	123	7.48	0.59	1.3	0.173797	5.1	0.681818	224.615	3.92308
60011022148	b80e48654791f9b20275db5b04d13fa4	SCLC	0	0	no	64.8571	0	no	male	70	62	165	22.7732	1	1	1	ICI+chemotherapy+antiangiogenic_therapy	Atezolizumab	PD-L1	1	0	0	0	1	1	0	1	0	0	0	0	0	1	0	1	0	1	0	0	85	138	7.4	0.57	0.89	0.12027	5.76	0.778378	95.5056	6.47191
60011032320	b7a3c16668e48b64f70410ad6a648d61	SCLC	0	0	no	121.429	0	no	male	56	75	170	25.9516	0	0	0	ICI+chemotherapy	Durvalumab	PD-L1	1	0	0	0	1	0	0	1	0	0	0	0	0	0	0	0	0	0	0	0	161	149	8.02	0.68	2.14	0.266833	4.98	0.620948	75.2336	2.3271
60011034899	bd3d01c9b4b6381042bd54199a11d51b	adenocarcinoma	0	0	no	121.571	0	no	male	64	75	176	24.2123	1	0	1	ICI	Atezolizumab	PD-L1	0	0	0	0	0	0	0	0	0	0	0	0	0	0	0	0	0	0	0	0	127	147	5.74	0.5	1.55	0.270035	3.62	0.630662	81.9355	2.33548
60011040900	745df0d950d8ceeeedb72664c3267192	adenocarcinoma	0	0	no	113.714	0	no	male	67	72	168	25.5102	1	0	0	ICI+chemotherapy+antiangiogenic_therapy	Pembrolizumab	PD-1	1	1	0	0	0	0	0	1	0	0	0	0	0	1	0	1	0	0	0	0	159	127	7.69	0.79	1.5	0.195059	5.25	0.682705	106	3.5
60011041719	3b5adb6f6726a54fae84580cdc85f70a	adenocarcinoma	0	0	no	114.571	0	no	male	84	63	161	24.3046	1	0	0	ICI	Tislelizumab	PD-1	0	0	0	0	0	0	0	0	0	0	0	0	0	0	0	0	0	0	0	0	197	130	5.6	0.74	1.5	0.267857	3.19	0.569643	131.333	2.12667
60011041839	e5927707a4503b3c4e540e85eae1eacf	SCC	0	0	no	118.714	0	no	male	69	57	176	18.4013	1	1	0	ICI+chemotherapy	Pembrolizumab	PD-1	1	0	1	0	0	0	0	1	0	0	0	0	0	0	0	0	0	0	0	0	208	103	7.21	0.66	1.65	0.228849	4.68	0.649098	126.061	2.83636
60011048101	92a4805a5e3727de1de37a4bd3942eff	adenocarcinoma	0	0	no	116.429	0	no	male	63	59	175	19.2653	0	0	0	ICI+chemotherapy	Sintilimab	PD-1	1	1	0	0	0	0	0	1	0	0	0	0	0	0	0	0	0	0	0	0	274	120	10.3	0.85	1.36	0.132039	8.02	0.778641	201.471	5.89706
60011048331	a44d043245d37016501d39465b9edb54	adenocarcinoma	0	0	no	114.571	0	no	female	76	68	158	27.2392	1	0	0	ICI+chemotherapy	Sintilimab	PD-1	1	1	0	0	0	0	0	0	0	0	0	0	0	0	0	0	0	0	0	0	317	127	9.96	0.67	1.52	0.15261	7.63	0.766064	208.553	5.01974
60011052608	5039bf3780e4067ffdb232e93a3ec215	adenocarcinoma	0	0	no	36.1429	0	no	female	54	42	155	17.4818	0	0	0	ICI+chemotherapy	Pembrolizumab	PD-1	1	1	0	0	0	0	1	1	0	0	0	0	0	0	0	0	0	0	0	0	208	96	4.4	0.31	1.23	0.279545	2.69	0.611364	169.106	2.18699
60011059333	d6bf5bf7cbf4fc58cd13167722f4bbb1	adenocarcinoma	0	0	no	53.4286	0	no	female	66	60	159	23.7332	0	0	0	ICI+antiangiogenic_therapy+targeted_therapy	Pembrolizumab	PD-1	0	0	0	0	0	0	0	0	0	1	0	1	0	1	0	1	0	0	0	0	276	127	18.14	1.01	1.63	0.0898567	15.36	0.846748	169.325	9.42331
60011069981	12abb67ad9c83473cb1bf3e8365e4d7c	adenocarcinoma	0	0	no	50.8571	0	no	male	61	77	168	27.2817	1	1	0	ICI+chemotherapy	Pembrolizumab	PD-1	1	1	0	0	0	0	1	0	0	0	0	0	0	0	0	0	0	0	0	0	142	134	5.75	0.39	1.22	0.212174	4.03	0.70087	116.393	3.30328
60011070879	c3c2d33735774c439aa307a991ba6a36	adenocarcinoma	0	0	no	116.857	0	no	male	67	78	169	27.31	1	1	0	ICI+chemotherapy	Tislelizumab	PD-1	1	1	0	0	0	0	0	1	0	0	0	0	0	0	0	0	0	0	0	0	89	113	5.29	0.47	1.38	0.26087	3.36	0.635161	64.4928	2.43478
60011071295	a4441424a158303b679d7844a8cee5f3	SCC	0	0	no	120.714	0	no	male	77	63	177	20.1092	1	0	0	ICI+chemotherapy	Atezolizumab	PD-L1	1	0	0	0	1	1	0	0	1	0	0	0	0	0	0	0	0	1	1	0	255	130	5.99	0.48	1.18	0.196995	4.3	0.717863	216.102	3.64407
60011093702	f6fb4c0e7422413087a9c9df2055a63c	adenocarcinoma	0	0	no	109.857	0	no	male	62	75	175	24.4898	1	1	0	ICI+chemotherapy	Pembrolizumab	PD-1	1	1	0	0	0	0	1	0	0	0	0	0	0	0	0	0	0	0	0	0	244	129	5.65	0.5	1.93	0.341593	3.14	0.555752	126.425	1.62694
60011094996	a0d5df26e0a8d8e741e5e2ac9b315fd3	SCC	0	0	no	114.571	0	no	male	76	75	174	24.7721	1	0	0	ICI+chemotherapy	Tislelizumab	PD-1	1	0	1	0	0	0	1	0	0	0	0	0	0	0	0	0	0	0	0	0	181	141	8.5	0.13	0.75	0.0882353	7.6	0.894118	241.333	10.1333
60011098333	fb4237bf5efc0603ef426b6d3a26c24f	SCLC	0	0	no	114.857	0	no	female	64	63	168	22.1797	0	0	0	ICI+chemotherapy	Tislelizumab	PD-1	1	0	0	0	0	0	0	1	1	0	0	0	0	0	0	0	0	0	0	0	168	106	7.02	0.57	0.51	0.0726496	5.79	0.824786	329.412	11.3529
60011105617	a7b25e2d65469390d2a85c2add9050b2	adenocarcinoma	1	1	Arrhythmia	44	1	ST-Segment Change	male	69	59	169	20.6575	1	0	0	ICI+chemotherapy	Sintilimab	PD-1	1	1	0	0	0	0	0	1	0	0	0	0	0	0	0	0	0	0	0	0	448	132	14.76	0.69	2.44	0.165312	11.49	0.778455	183.607	4.70902
60011125256	ff62967045339660c1a0dcca7fc0edd4	SCC	0	0	no	119.143	0	no	male	67	80	170	27.6817	1	0	0	ICI+chemotherapy	Durvalumab	PD-L1	1	0	0	0	0	1	1	1	0	0	0	0	0	0	0	0	0	0	0	0	243	128	6.43	0.73	1.75	0.272162	3.76	0.584759	138.857	2.14857
60011129403	70dc06baa5c1f7ad180d04d8a7e2d34d	adenocarcinoma	0	0	no	98.4286	0	no	male	53	68	169	23.8087	1	1	0	ICI	Durvalumab	PD-L1	0	0	0	0	0	0	0	0	0	0	0	0	0	0	0	0	0	1	0	0	185	139	4.85	0.35	1.12	0.230928	2.83	0.583505	165.179	2.52679
60011130242	0d40cfbe614af7d255652b9c7615910c	adenocarcinoma	0	0	no	73.7143	0	no	male	77	50	154	21.0828	0	0	0	ICI	Durvalumab	PD-L1	0	0	0	0	0	0	0	0	0	0	0	0	0	0	0	0	0	0	0	0	92	80	5.33	0.42	0.27	0.0506567	4.31	0.80863	340.741	15.963
60011136176	4d6c106129310608cd2776f5b4ea1167	adenocarcinoma	1	1	Myocarditis	16	0	no	male	63	60	163	22.5827	1	0	0	ICI+chemotherapy	Pembrolizumab	PD-1	1	1	0	0	0	0	0	0	0	0	0	0	0	0	0	0	0	1	1	0	374	141	10.7	0.56	3.33	0.311215	6.4	0.598131	112.312	1.92192
60011143305	8dbe0812fe0005e3b42eb8625396c687	adenocarcinoma	0	0	no	115	0	no	male	70	70	168	24.8016	1	1	0	ICI+chemotherapy	Camilizumab	PD-1	1	0	1	0	0	0	0	1	0	0	0	0	0	0	0	0	0	0	0	0	308	135	8.57	0.73	1.83	0.213536	5.8	0.676779	168.306	3.1694
60011144611	1f13ff946c6549e0e22a58b2eb0453b9	adenocarcinoma	0	0	no	112	0	no	male	61	76	179	23.7196	1	0	0	ICI+chemotherapy	Sintilimab	PD-1	1	1	0	0	0	0	0	1	0	0	0	0	0	0	0	0	0	0	0	0	221	110	3.75	0.45	1.24	0.330667	1.99	0.530667	178.226	1.60484
60011145545	eafae302794e99dbd37d413ef00b33a5	adenocarcinoma	0	0	no	111.429	0	no	male	61	64	168	22.6757	1	0	0	ICI+chemotherapy+antiangiogenic_therapy	Camilizumab	PD-1	1	1	0	0	0	0	0	1	0	0	0	0	0	1	1	0	0	0	0	0	307	116	3.45	0.81	1.36	0.394203	0.96	0.278261	225.735	0.705882
60011148716	62efae723cfd4dddeebd8c089efdd8ce	SCC	0	0	no	115	0	no	male	61	84	180	25.8025	1	1	0	ICI+chemotherapy+antiangiogenic_therapy	Camilizumab	PD-1	1	1	0	1	0	0	0	0	1	0	0	0	0	1	0	1	0	0	0	0	309	137	10.33	0.31	0.62	0.0600194	9.37	0.907067	498.387	15.1129
60011165260	4e3c1a6e58caebe7a6308184f9bb0dbb	NSCLC	0	0	no	102	0	no	male	55	66	171	22.571	0	0	0	ICI	Pembrolizumab	PD-1	0	0	0	0	0	0	0	0	0	0	0	0	0	0	0	0	0	0	1	0	60	132	7.13	0.4	0.92	0.129032	5.77	0.809257	65.2174	6.27174
60011178451	85db82bc6491920d8464c3efc61a1586	adenocarcinoma	0	0	no	97.1429	0	no	male	73	70	167	25.0995	1	1	0	ICI+chemotherapy	Tislelizumab	PD-1	1	0	0	0	0	1	1	0	0	0	0	0	0	0	0	0	0	0	0	0	189	135	2.58	0.18	0.73	0.282946	1.62	0.627907	258.904	2.21918
60011181195	5bd4e653f12417efb5212bcb5ddf3f92	adenocarcinoma	0	0	no	115	0	no	male	74	69	160	26.9531	1	1	0	ICI+chemotherapy+antiangiogenic_therapy	Tislelizumab	PD-1	1	0	0	0	0	0	0	0	1	0	0	0	0	1	0	1	0	0	0	0	296	125	8.64	0.88	1.26	0.145833	6.33	0.732639	234.921	5.02381
60011185355	f1bb7e8019f7fd4631625fc91b92a6f4	adenocarcinoma	0	0	no	109.857	0	no	female	68	70	178	22.0932	0	0	0	ICI+antiangiogenic_therapy	Pembrolizumab	PD-1	0	0	0	0	0	0	0	0	0	0	0	0	0	1	0	0	1	0	0	0	153	111	5.35	0.64	1.87	0.349533	2.78	0.519626	81.8182	1.48663
60011187197	2fa291800d6fa580623d9082a5e16423	adenocarcinoma	1	2	Myocarditis	22	0	no	female	73	60	167	21.5139	1	1	1	ICI+chemotherapy+antiangiogenic_therapy	Pembrolizumab	PD-1	1	1	0	0	0	0	0	0	0	0	0	0	0	1	1	0	0	0	1	0	179	136	5.79	0.18	1.11	0.19171	4.48	0.773748	161.261	4.03604
60011188631	092c47c74683567bd5e844600b5826d6	SCC	0	0	no	114.286	0	no	female	52	45	150	20	0	0	0	ICI+chemotherapy	Durvalumab	PD-L1	1	0	0	0	1	0	1	0	0	0	0	0	0	0	0	0	0	1	0	0	387	106	10.88	1.03	1.35	0.124081	8.4	0.772059	286.667	6.22222
60011191881	9334465df590ffdcd44d68a8f854ef9e	adenocarcinoma	0	0	no	114.714	0	no	male	69	68	166	24.677	0	0	0	ICI+chemotherapy+antiangiogenic_therapy	Camilizumab	PD-1	1	1	0	0	0	0	0	0	1	0	0	0	0	1	1	0	0	0	0	0	382	114	11.03	0.72	1.85	0.167724	8.15	0.738894	206.486	4.40541
60011192699	9241109f1670e11b6f8e29819be4be73	adenocarcinoma	0	0	no	112.857	0	no	male	70	83	173	27.7323	0	0	1	ICI+chemotherapy	Pembrolizumab	PD-1	1	1	0	0	0	0	1	0	0	0	0	0	0	0	0	0	0	0	1	0	506	129	11.98	1.1	1.42	0.118531	8.84	0.737896	356.338	6.22535
60011207079	883ac4816fea3105be2137b70a6fcf6f	SCC	0	0	no	116.143	0	no	male	65	72	166	26.1286	1	1	0	ICI+chemotherapy	Durvalumab	PD-L1	1	0	0	0	1	0	1	0	0	0	0	0	0	0	0	0	0	0	1	0	276	130	6.21	0.45	1.94	0.312399	3.57	0.574879	142.268	1.84021
60011210421	34af5fe51470736b2e220d8ff92a3209	adenocarcinoma	0	0	no	75.2857	0	no	male	62	71	175	23.1837	0	0	0	ICI+chemotherapy	Sintilimab	PD-1	1	1	0	0	0	0	0	0	1	0	0	0	0	0	0	0	0	0	0	0	210	161	9.89	0.72	2.32	0.23458	6.87	0.694641	90.5172	2.96121
60011215167	b22cfe80f273020f31f82992de6cac53	adenocarcinoma	0	0	no	82.4286	0	no	male	58	67	169	23.4586	1	1	0	ICI+chemotherapy+antiangiogenic_therapy	Pembrolizumab	PD-1	1	1	0	1	0	0	0	0	1	0	0	0	0	1	0	1	0	0	0	0	174	152	5.96	0.36	1.77	0.29698	3.76	0.630872	98.3051	2.12429
60011221738	49da6c116f69e39e968d2f48a85da7e5	SCC	0	0	no	117.143	0	no	male	56	84	170	29.0657	1	0	0	ICI+chemotherapy	Tislelizumab	PD-1	1	0	1	0	0	0	0	0	1	0	0	0	0	0	0	0	0	0	0	0	100	135	7.07	0.52	2.73	0.386139	3.79	0.536068	36.63	1.38828
60011228086	470fa1db08b48fdb54d8d2f231e4646e	adenocarcinoma	0	0	no	107.714	0	no	male	55	70	165	25.7117	1	1	0	ICI+chemotherapy	Durvalumab	PD-L1	1	0	0	0	1	1	0	1	0	0	0	0	0	0	0	0	0	0	0	0	248	127	4.6	0.55	1.74	0.378261	2.28	0.495652	142.529	1.31034
60011237317	4e834d1b6863ceb15380a7596dc08f2a	adenocarcinoma	1	1	Arrhythmia	3	1	Left Anterior Fascicular Block (LAFB)	male	65	53	165	19.4674	0	0	0	ICI+chemotherapy	Tislelizumab	PD-1	1	0	0	0	0	0	0	1	0	0	0	0	0	0	0	0	0	0	0	0	300	122	8.87	0.76	1.65	0.18602	6.26	0.70575	181.818	3.79394
60011238207	f67e1e191b319feb2c2b1ccf50726862	adenocarcinoma	0	0	no	70	0	no	male	62	81	169	28.1853	1	0	0	ICI+chemotherapy	Sintilimab	PD-1	1	1	0	0	0	0	0	1	0	0	0	0	0	0	0	0	0	0	0	0	169	119	8.29	1	1.74	0.209891	5.06	0.610374	97.1264	2.90805
60011240247	c874f71f26d2707c288cba14d04d69a6	adenocarcinoma	0	0	no	82.7143	0	no	male	73	55	169	19.257	1	0	0	ICI+chemotherapy+antiangiogenic_therapy	Sintilimab	PD-1	1	0	0	1	0	0	0	0	0	0	0	0	0	1	0	0	1	0	0	0	316	111	9.15	0.61	1.98	0.216393	6.32	0.69071	159.596	3.19192
60011250583	fefc10d72d6acd5860b847552937841d	adenocarcinoma	0	0	no	111.571	0	no	female	82	60	150	26.6222	0	0	0	ICI+chemotherapy	Camilizumab	PD-1	1	0	1	0	0	0	0	0	0	0	0	0	0	0	0	0	0	0	1	0	160	129	4.59	0.19	1	0.217865	3.26	0.71024	160	3.26
60011251828	cd6180a7c3a8c2dae71682f999e6c939	adenocarcinoma	0	0	no	109.571	0	no	male	70	89	175	29.0612	1	1	0	ICI+chemotherapy	Sintilimab	PD-1	1	1	0	0	0	0	0	1	0	0	0	0	0	0	0	0	0	0	1	0	315	121	11.94	0.93	3.07	0.257119	7.65	0.640704	102.606	2.49186
60011265781	e026d36b34ea438b251b6d6129960668	adenocarcinoma	0	0	no	116.286	0	no	female	78	55	160	21.4844	0	0	0	ICI+chemotherapy+antiangiogenic_therapy	Pembrolizumab	PD-1	1	1	0	0	0	0	0	0	0	0	0	0	0	1	0	0	1	0	0	0	323	123	6.7	0.66	1.43	0.213433	4.29	0.640299	225.874	3
60011282187	7ef02ab4bb256f3501ad01e3b5a6fb89	adenocarcinoma	0	0	no	115.857	0	no	male	56	76	180	23.4568	1	0	0	ICI+chemotherapy	Durvalumab	PD-L1	1	0	0	0	1	0	0	1	0	0	0	0	0	0	0	0	0	0	0	0	127	133	3.9	0.3	0.93	0.238462	2.35	0.602564	136.559	2.52688
60011285491	a378f2c38e35ed31197016bcc17f8da2	adenocarcinoma	0	0	no	116	0	no	male	67	73	176	23.4052	1	1	0	ICI+chemotherapy	Pembrolizumab	PD-1	1	0	1	0	0	0	0	1	0	0	0	0	0	0	0	0	0	0	1	0	263	148	8.04	0.67	1.76	0.218905	5.01	0.623134	149.432	2.84659
60011299655	308a95520f7e1b121e57638e9b12ac92	SCC	0	0	no	32.4286	0	no	male	66	55	156	22.6003	1	0	0	ICI+chemotherapy	Tislelizumab	PD-1	1	0	1	0	0	0	0	0	1	0	0	0	0	0	0	0	0	0	0	0	204	137	6.22	0.52	1.52	0.244373	3.98	0.639871	134.211	2.61842
60011299781	8356f854846b7de9997ca64c2b0bc676	SCC	0	0	no	93.5714	0	no	male	73	64	162	24.3865	1	1	0	ICI+chemotherapy	Pembrolizumab	PD-1	1	1	0	0	0	0	0	1	0	0	0	0	0	0	0	0	0	1	0	0	255	141	6.52	0.58	1.18	0.180982	4.49	0.68865	216.102	3.80508
60011308937	371dc37a3cc9ae416aa0041a29af9053	adenocarcinoma	0	0	no	52.8571	0	no	male	75	70	171	23.9048	1	0	0	ICI+chemotherapy	Pembrolizumab	PD-1	1	0	0	0	0	0	0	1	0	0	0	0	0	0	0	0	0	0	1	0	261	105	9.56	1.13	1.18	0.123431	6.49	0.67887	221.186	5.5
60011311497	2d053373e2595962dacfd81866b2a443	SCC	0	0	no	87.8571	0	no	male	66	66	165	24.2424	1	1	0	ICI	Tislelizumab	PD-1	0	0	0	0	0	0	0	0	0	0	0	0	0	0	0	0	0	0	0	0	297	166	7.38	0.74	2.69	0.364499	3.65	0.49458	110.409	1.35688
60011311683	b1f7c39b413db71b05470d412b1cd052	SCC	0	0	no	114.857	0	no	male	70	55	157	22.3133	1	1	1	ICI+chemotherapy	Tislelizumab	PD-1	1	0	1	0	0	0	0	1	0	0	0	0	0	0	0	0	0	0	0	0	139	129	9.21	0.42	1.7	0.184582	7.07	0.767644	81.7647	4.15882
60011312399	d769223e21df35a03dafdfea5a674920	SCC	0	0	no	60.4286	0	no	female	47	60	160	23.4375	1	1	0	ICI+chemotherapy+antiangiogenic_therapy	Tislelizumab	PD-1	1	0	1	0	1	0	1	0	0	0	0	0	0	1	1	0	0	0	0	0	227	96	3.89	0.74	1.18	0.303342	1.88	0.48329	192.373	1.59322
60011321738	fad8b5c7d385707cc13cf4451c91db7d	SCC	0	0	no	30.4286	0	no	male	76	54	156	22.1893	1	1	0	ICI+chemotherapy	Sintilimab	PD-1	1	0	1	0	0	0	0	1	0	0	0	0	0	0	0	0	0	0	1	0	201	113	6.48	0.78	1.21	0.186728	4.03	0.621914	166.116	3.33058
60011324696	998bc54847104609663edc3ad4fa8e83	SCLC	0	0	no	113.429	0	no	female	38	59	160	23.0469	0	0	1	ICI+chemotherapy	Atezolizumab	PD-L1	1	0	0	0	1	1	1	0	0	0	0	0	0	0	0	0	0	0	0	0	330	121	9.61	0.39	0.82	0.0853278	8.39	0.873049	402.439	10.2317
60011332965	cd025a237341c8c1fe999e7ead234d0c	adenocarcinoma	0	0	no	94.7143	0	no	male	67	70	160	27.3438	1	1	0	ICI+chemotherapy	Sintilimab	PD-1	1	1	0	0	0	0	0	1	0	0	0	0	0	0	0	0	0	0	1	0	189	106	7.14	0.72	1.5	0.210084	4.74	0.663866	126	3.16
60011342512	6efc85e3b737f68c63aeccf803ad9cbd	SCLC	0	0	no	112.286	0	no	male	71	55	169	19.257	1	0	1	ICI+chemotherapy	Tislelizumab	PD-1	1	0	0	0	1	0	1	0	0	0	0	0	0	0	0	0	0	0	0	0	234	124	5.13	0.62	1.32	0.25731	2.92	0.569201	177.273	2.21212
60011343605	3e62a60737f310b2d17ce865618195f5	adenocarcinoma	0	0	no	110.571	0	no	male	57	49	167	17.3904	0	0	0	ICI+chemotherapy	Pembrolizumab	PD-1	1	1	0	0	0	0	0	0	1	0	0	0	0	0	0	0	0	0	0	0	289	117	7.75	0.5	1.69	0.218065	5.38	0.694194	171.006	3.18343
60011351629	53fd7e5e4f55fa401c79c19f6bac0eff	SCLC	0	0	no	28.7143	0	no	female	54	73	160	28.3203	0	0	0	ICI+chemotherapy	Sintilimab	PD-1	1	0	0	0	1	0	0	1	0	0	0	0	0	0	0	0	0	0	0	0	205	127	4.9	0.38	0.8	0.163265	3.66	0.746939	256.25	4.575
60011357553	c7f40c604476cb9e26b85ab93c9a6a96	SCC	0	0	no	108.429	0	no	male	64	45	151	19.736	1	0	0	ICI+chemotherapy	Nivolumab	PD-1	1	0	1	0	0	0	0	0	1	0	0	0	0	0	0	0	0	0	0	0	308	129	8.3	0.95	1.29	0.155422	5.99	0.721687	238.76	4.64341
60011360410	617f6f35ca4463bef435a33c5ce4ce92	SCLC	0	0	no	73.5714	0	no	male	72	63	164	23.4236	1	0	0	ICI+chemotherapy	Durvalumab	PD-L1	1	0	0	0	0	1	0	0	0	0	0	0	0	0	0	0	0	0	0	0	210	146	4.47	0.54	1.02	0.228188	2.86	0.639821	205.882	2.80392
60011361961	ecf0540d59c0fb9802d38349eda6b8b1	adenocarcinoma	1	1	Arrhythmia	3	1	Left Anterior Fascicular Block (LAFB)	male	64	55	159	21.7555	1	1	0	ICI+chemotherapy	Tislelizumab	PD-1	1	1	0	0	0	0	0	1	0	0	0	0	0	0	0	0	0	0	0	0	231	120	5.53	0.39	1.81	0.327306	3.13	0.566004	127.624	1.72928
60011362775	e4a2f77cf6fd9d6def0c35900526df86	SCC	0	0	no	98.7143	0	no	male	52	68	176	21.9525	1	1	0	ICI+chemotherapy	Tislelizumab	PD-1	1	0	1	0	0	0	1	0	0	0	0	0	0	0	0	0	0	0	0	0	380	131	11.22	1.24	2.62	0.233512	6.9	0.614973	145.038	2.63359
60011367474	2ddd655168680ac8fd43a8b708e0ac90	SCC	0	0	no	112.571	0	no	male	68	65	164	24.1672	1	0	0	ICI+chemotherapy	Sintilimab	PD-1	1	0	1	0	0	0	0	1	0	0	0	0	0	0	0	0	0	0	0	0	264	139	7.04	0.53	1.52	0.215909	4.87	0.691761	173.684	3.20395
60011369959	d7868ed4bc8403727e67140c9ccd85d7	SCC	0	0	no	108.714	0	no	male	49	75	167	26.8923	0	0	0	ICI+chemotherapy	Tislelizumab	PD-1	1	1	0	0	0	0	0	1	0	0	0	0	0	0	0	0	0	0	1	0	293	114	7.48	0.52	1.72	0.229947	4.83	0.645722	170.349	2.80814
60011376383	d5489afb506cfcb652355a49491f992e	SCC	0	0	no	104.143	0	no	male	71	68	167	24.3824	1	0	0	ICI+chemotherapy	Tislelizumab	PD-1	1	0	0	0	0	1	0	1	0	0	0	0	0	0	0	0	0	0	0	0	182	102	8.51	1.09	1.26	0.148061	6.13	0.720329	144.444	4.86508
60011377328	18e87c46ab0353774b696010627c9c53	adenocarcinoma	0	0	no	113.714	0	no	male	57	90	172	30.4218	0	0	0	ICI+chemotherapy	Sintilimab	PD-1	1	1	0	0	0	0	0	0	1	0	0	0	0	0	0	0	0	0	1	0	171	146	5.43	0.39	1.23	0.226519	3.74	0.688766	139.024	3.04065
60011387078	f83240a8eb257674efe950e293d13200	SCC	0	0	no	113.286	0	no	male	69	58	159	22.9421	1	0	0	ICI+chemotherapy	Sintilimab	PD-1	1	0	1	0	0	0	0	1	0	0	0	0	0	0	0	0	0	0	0	0	264	123	7.44	0.57	1.37	0.18414	5.15	0.692204	192.701	3.75912
60011387144	78b1e1bef671567a424784f40092352d	adenocarcinoma	0	0	no	108.286	0	no	female	46	58	156	23.6275	0	0	0	ICI+chemotherapy	Tislelizumab	PD-1	1	1	0	0	0	0	0	1	0	0	0	0	0	0	0	0	0	0	0	0	246	122	6.76	0.39	1.75	0.258876	4.55	0.673077	140.571	2.6
60011388755	36b18eee4cb22e3db3d93022a165e1a2	SCC	0	0	no	112	0	no	male	65	75	170	25.9516	1	0	0	ICI+chemotherapy	Sintilimab	PD-1	1	0	1	0	0	0	0	1	0	0	0	0	0	0	0	0	0	0	0	0	231	138	6.27	0.43	2.22	0.354067	3.38	0.539075	104.054	1.52252
60011388986	009083fd9f3af7f6ff81aabe22564c54	SCC	0	0	no	104.143	0	no	male	62	69	167	24.7409	1	0	0	ICI+chemotherapy+antiangiogenic_therapy	Tislelizumab	PD-1	1	1	0	0	0	0	0	1	0	0	0	0	0	1	0	1	0	0	0	0	229	103	14.33	0.62	0.93	0.0648988	12.43	0.867411	246.237	13.3656
60011397210	1f578bd556360a24744d0a6d3f02bf40	adenocarcinoma	0	0	no	40.7143	0	no	male	51	58	170	20.0692	1	0	0	ICI+chemotherapy	Tislelizumab	PD-1	1	0	0	0	0	0	1	0	0	0	0	0	0	0	0	0	0	0	0	0	347	113	5.8	0.47	0.61	0.105172	4.66	0.803448	568.852	7.63934
60011409225	9943c9b5edad2eb3552f761e4d04a78f	adenocarcinoma	0	0	no	108.571	0	no	male	63	60	161	23.1473	1	1	0	ICI+antiangiogenic_therapy	Pembrolizumab	PD-1	0	0	0	0	0	0	0	0	0	0	0	0	0	1	1	0	0	0	0	0	257	128	10.45	1.18	2.03	0.194258	6.43	0.615311	126.601	3.16749
60011411738	3ef0e62cb893f2863fa7c8587e32cd46	adenocarcinoma	0	0	no	92.7143	0	no	male	59	80	173	26.7299	1	0	0	ICI+chemotherapy	Durvalumab	PD-L1	1	0	0	0	0	1	0	1	0	0	0	0	0	0	0	0	0	1	0	0	332	132	6.97	0.54	1.8	0.25825	4.4	0.631277	184.444	2.44444
60011412869	71f992961a193a14016e0edea1cf612d	adenocarcinoma	0	0	no	104.571	0	no	male	62	55	154	23.1911	1	1	0	ICI+chemotherapy+antiangiogenic_therapy	Tislelizumab	PD-1	1	1	1	0	0	0	1	0	1	0	0	0	0	1	1	0	0	0	0	0	346	128	4.59	0.54	0.68	0.148148	3.25	0.708061	508.824	4.77941
60011415285	9e68714ca965c6587f4187c6fc1bc2d4	SCLC	0	0	no	89.8571	0	no	male	78	58	157	23.5304	1	1	0	ICI+chemotherapy	Tislelizumab	PD-1	1	0	0	0	1	0	0	0	1	0	0	0	0	0	0	0	0	0	0	1	201	127	11.24	0.67	0.94	0.0836299	9.51	0.846085	213.83	10.117
60011416547	07d4ca3ecf21fab35333bec25d886e86	SCC	0	0	no	94.8571	0	no	male	67	54	166	19.5965	1	0	0	ICI	Pembrolizumab	PD-1	0	0	0	0	0	0	0	0	0	0	0	0	0	0	0	0	0	0	0	0	54	86	7.82	0.37	1.54	0.196931	5.73	0.732737	35.0649	3.72078
60011417763	74a5bef2fdd7f64d757ddbc75893903d	adenocarcinoma	0	0	no	112.857	0	no	male	63	70	168	24.8016	0	0	0	ICI+chemotherapy	Durvalumab	PD-L1	1	0	0	0	1	0	0	1	0	0	0	0	0	0	0	0	0	0	1	0	129	106	7.02	0.64	0.64	0.0911681	5.02	0.7151	201.562	7.84375
60011418263	5fde9f02474d404c17671b2d85d02cf7	adenocarcinoma	0	0	no	104.714	0	no	male	68	69	175	22.5306	1	1	0	ICI+chemotherapy	Atezolizumab	PD-L1	1	0	0	0	1	0	0	0	0	0	0	0	0	0	0	0	0	0	1	0	201	140	11.34	1.14	1.87	0.164903	7.96	0.70194	107.487	4.25668
60011422190	d89027fb107ed7ba39c9df429ee9b69d	adenocarcinoma	0	0	no	107.571	0	no	female	49	55	160	21.2891	0	0	1	ICI+chemotherapy+antiangiogenic_therapy	Tislelizumab	PD-1	1	1	1	0	0	0	1	1	1	0	0	0	0	1	1	0	0	0	0	0	125	108	6.85	0.52	1	0.145985	5.28	0.770803	125	5.28
60011422520	7f283f2e1240e0b06616a9553175d148	SCC	0	0	no	112.571	0	no	male	68	65	164	24.1672	1	0	0	ICI+chemotherapy	Durvalumab	PD-L1	1	0	0	0	1	0	0	1	0	0	0	0	0	0	0	0	0	0	0	0	200	161	9.84	0.52	1.6	0.162602	7.52	0.764228	125	4.7
60011432024	6ddc7576428e592142aa5963f815a46d	SCC	0	0	no	81.8571	0	no	male	57	55	160	21.4844	1	0	0	ICI+chemotherapy	Tislelizumab	PD-1	1	0	1	0	0	0	0	1	0	0	0	0	0	0	0	0	0	0	0	0	111	93	4.19	0.59	0.52	0.124105	2.97	0.708831	213.462	5.71154
60011438048	d7642b08011dcf9de777c71f071c504b	SCC	0	0	no	44	0	no	male	58	72	170	24.9135	1	1	0	ICI+chemotherapy	Pembrolizumab	PD-1	1	0	1	0	0	0	0	1	0	0	0	0	0	0	0	0	0	0	0	0	284	136	8.32	0.63	2.76	0.331731	4.76	0.572115	102.899	1.72464
60011443177	f02da049609e0d78873566649b8dabea	SCC	0	0	no	108.429	0	no	male	72	62	165	22.7732	0	0	0	ICI+chemotherapy	Camilizumab	PD-1	1	1	0	0	0	0	0	1	0	0	0	0	0	0	0	0	0	0	0	0	324	122	13.34	1.05	1.23	0.0922039	10.99	0.823838	263.415	8.93496
60011446105	14989e1617fb41c7b900cfdfbfadb9d0	sarcomatoid carcinoma	0	0	no	108.714	0	no	male	70	63	165	23.1405	1	0	0	ICI	Camilizumab	PD-1	0	0	0	0	0	0	0	0	0	0	0	0	0	0	0	0	0	0	0	0	310	123	7.43	0.66	0.94	0.126514	5.53	0.74428	329.787	5.88298
60011448509	6dc7d1e238b2ebf1b75b4ccc01c058ee	adenocarcinoma	0	0	no	100.429	0	no	male	74	50	152	21.6413	1	1	0	ICI+chemotherapy	Tislelizumab	PD-1	1	0	1	0	0	0	0	1	0	0	0	0	0	0	0	0	0	0	0	0	320	119	6.74	0.74	0.56	0.0830861	4.69	0.695846	571.429	8.375
60011449439	3f7d0e5bef9f5b7894406a9f974e5b96	SCLC	0	0	no	103.571	0	no	male	73	65	176	20.984	1	0	0	ICI+chemotherapy	Tislelizumab	PD-1	1	0	0	0	1	0	0	1	0	0	0	0	0	0	0	0	0	0	0	0	231	110	6.23	0.65	1.01	0.162119	4.48	0.719101	228.713	4.43564
60011465531	02883666015b26864a8d55cc0f55d8a2	SCLC	0	0	no	107.429	0	no	male	80	69	167	24.7409	1	0	0	ICI+chemotherapy	Durvalumab	PD-L1	1	0	0	0	1	0	0	1	0	0	0	0	0	0	0	0	0	0	1	0	233	135	6.87	0.52	1.07	0.15575	5.24	0.762737	217.757	4.8972
60011487460	cfcb78db4274487390df2d11f986b910	SCLC	0	0	no	87.5714	0	no	male	80	59	160	23.0469	0	0	0	ICI+antiangiogenic_therapy	Tislelizumab	PD-1	0	0	0	0	0	0	0	0	0	0	0	0	0	1	0	1	0	0	0	0	209	116	6.14	0.77	1.32	0.214984	4.01	0.653094	158.333	3.03788
60011493034	61a122894aa2108663ddb0e6d0283d7f	adenocarcinoma	0	0	no	111	0	no	male	51	66	175	21.551	0	0	0	ICI	Sintilimab	PD-1	0	0	0	0	0	0	0	0	0	0	0	0	0	0	0	0	0	0	0	0	331	92	4.68	0.56	0.97	0.207265	3.1	0.662393	341.237	3.19588
60011503995	4663864d78bc21116916df3fca7769ef	SCC	0	0	no	110.714	0	no	male	73	60	160	23.4375	1	0	0	ICI+chemotherapy	Pembrolizumab	PD-1	1	0	1	0	0	0	1	0	0	0	0	0	0	0	0	0	0	0	0	0	122	142	5.4	0.17	1.1	0.203704	4.06	0.751852	110.909	3.69091
60011506507	c4ee776496910a6beae1d6ac68ea527a	adenocarcinoma	1	1	Pericarditis	24	0	no	male	47	75	165	27.5482	1	0	0	ICI+chemotherapy+antiangiogenic_therapy	Sintilimab	PD-1	1	0	1	0	0	0	0	0	0	0	0	0	0	1	0	1	1	0	0	0	393	154	8.83	1.03	3.03	0.343148	4.62	0.523216	129.703	1.52475
60011507941	c7333a356fb4b5816144c0048ffb69cd	SCC	0	0	no	110.143	0	no	male	70	50	155	20.8117	0	0	0	ICI+chemotherapy	Pembrolizumab	PD-1	1	1	0	0	0	0	0	1	0	0	0	0	0	0	0	0	0	0	0	0	255	110	10.17	0.36	0.45	0.0442478	9.05	0.889872	566.667	20.1111
60011515910	86df0d4fc2d2d4e8381b093100f14732	SCC	0	0	no	102.571	0	no	male	62	52	149	23.4224	0	0	0	ICI+chemotherapy	Pembrolizumab	PD-1	1	0	1	0	0	0	1	0	0	0	0	0	0	0	0	0	0	1	0	0	322	23	7.06	0.52	1.72	0.243626	4.63	0.655807	187.209	2.69186
60011525263	fb53ed2d466c7b2c82d12f916a9bccfc	SCC	0	0	no	103.429	0	no	male	60	62	166	22.4996	1	0	0	ICI+chemotherapy	Tislelizumab	PD-1	1	0	0	1	0	0	0	1	0	0	0	0	0	0	0	0	0	0	0	0	254	137	9	0.61	0.98	0.108889	7.07	0.785556	259.184	7.21429
60011527097	d825f65fd7517fc5deb2ecef379de0ab	SCC	0	0	no	109.571	0	no	male	69	56	160	21.875	1	1	0	ICI+chemotherapy	Sintilimab	PD-1	1	0	0	1	0	0	0	1	0	0	0	0	0	0	0	0	0	0	0	0	143	127	3.91	0.22	0.86	0.219949	2.76	0.705882	166.279	3.2093
60011528551	f99b321a52ace0a30f031787d9bc63ee	adenocarcinoma	0	0	no	101	0	no	male	38	67	161	25.8478	1	0	0	ICI+chemotherapy+antiangiogenic_therapy	Sintilimab	PD-1	1	1	0	0	0	0	1	0	0	0	0	0	0	1	1	0	0	0	0	0	209	139	16.5	1.49	3.48	0.210909	11.45	0.693939	60.0575	3.29023
60011535120	4ea7922f66ddc6eec24fa4bcce3c0fdf	sarcomatoid carcinoma	0	0	no	102.571	0	no	male	57	56	171	19.1512	1	0	0	ICI+chemotherapy+targeted_therapy	Tislelizumab	PD-1	1	0	0	0	0	0	0	0	1	1	0	1	0	0	0	0	0	0	0	0	356	89	16.71	2.38	1.01	0.0604428	13.17	0.788151	352.475	13.0396
60011535887	c04926aff721a8b9ebe7990a73bb2e0c	NET	0	0	no	100.429	0	no	male	75	62	168	21.9671	1	0	0	ICI+chemotherapy	Tislelizumab	PD-1	1	0	1	0	0	0	0	1	0	0	0	0	0	0	0	0	0	0	1	0	217	129	7.58	0.62	1.75	0.230871	4.37	0.576517	124	2.49714
60011539587	729c7e2cac0d59916625521a4e76a167	SCLC	0	0	no	88	0	no	male	78	57	162	21.7193	0	0	0	ICI+chemotherapy	Tislelizumab	PD-1	1	0	1	0	0	0	0	1	0	0	0	0	0	0	0	0	0	0	0	0	166	116	5.53	0.4	0.98	0.177215	4.09	0.739602	169.388	4.17347
60011540428	7839c68e200a66c39077cbd41554cb8d	SCC	0	0	no	103.714	0	no	male	72	55	160	21.4844	0	0	1	ICI+chemotherapy	Pembrolizumab	PD-1	1	1	1	0	0	0	0	1	0	0	0	0	0	0	0	0	0	1	0	0	407	111	9.6	0.66	1.04	0.108333	7.82	0.814583	391.346	7.51923
60011547585	52eb5edf22d42a551bba80fb78959e1c	adenocarcinoma	0	0	no	109.286	0	no	male	63	50	166	18.1449	1	1	0	ICI+chemotherapy	Pembrolizumab	PD-1	1	1	0	0	0	0	0	0	1	0	0	0	0	0	0	0	0	0	1	0	358	144	9.53	0.73	2.12	0.222455	6.52	0.684155	168.868	3.07547
60011552774	ab0bc3f6ee3130d1567ecccb8d2f1bf6	adenocarcinoma	0	0	no	108.857	0	no	male	71	60	153	25.6312	1	1	0	ICI+chemotherapy	Tislelizumab	PD-1	1	0	1	0	0	0	0	1	0	0	0	0	0	0	0	0	0	0	0	0	187	150	8.39	0.98	2.08	0.247914	5.2	0.619785	89.9038	2.5
60011555846	b49f71a32ff96d8abbaa56aecd90005d	adenocarcinoma	0	0	no	51.4286	0	no	male	48	77	168	27.2817	1	0	0	ICI+chemotherapy	Pembrolizumab	PD-1	1	0	1	0	0	0	0	0	1	0	0	0	0	0	0	0	0	0	0	0	330	134	6.29	0.57	2.02	0.321145	3.56	0.565978	163.366	1.76238
60011564283	924d91f341d188e7c6fd9dd49c5bdf6a	adenocarcinoma	0	0	no	109	0	no	male	51	64	168	22.6757	1	1	0	ICI+chemotherapy	Pembrolizumab	PD-1	1	0	1	0	0	0	0	1	0	0	0	0	0	0	0	0	0	0	0	0	304	141	4.64	0.6	1.33	0.286638	2.53	0.545259	228.571	1.90226
60011567835	0d41835e57ee5fd27a46d74bc5510f78	SCC	0	0	no	103.429	0	no	male	57	73	180	22.5309	1	0	0	ICI+chemotherapy	Sintilimab	PD-1	1	0	1	0	0	0	0	1	0	0	0	0	0	0	0	0	0	0	0	0	130	127	8.02	0.84	2.59	0.322943	4.46	0.55611	50.1931	1.72201
60011574000	467bf6931010d19c268db826ecccd379	adenocarcinoma	0	0	no	104.571	0	no	female	53	54	166	19.5965	0	0	0	ICI+chemotherapy	Pembrolizumab	PD-1	1	0	1	0	0	0	0	1	0	0	0	0	0	0	0	0	0	0	0	0	418	106	8.38	0.67	0.74	0.0883055	6.92	0.825776	564.865	9.35135
60011582289	68de244e2ac2b0eb1cf7bcae5b5dbe93	SCLC	0	0	no	104.571	0	no	male	53	54	160	21.0938	1	0	0	ICI+chemotherapy	Durvalumab	PD-L1	1	0	0	0	1	0	0	1	0	0	0	0	0	0	0	0	0	0	0	0	182	133	7.96	0.74	1.6	0.201005	5.45	0.684673	113.75	3.40625
60011586158	f410e774de75189556c39741d47e4f2a	adenocarcinoma	0	0	no	103.286	0	no	female	60	54	163	20.3244	0	0	0	ICI+chemotherapy+antiangiogenic_therapy	Atezolizumab	PD-L1	1	0	1	0	0	0	0	0	0	0	0	0	0	1	1	0	0	0	0	0	154	103	3.04	0.32	0.9	0.296053	1.74	0.572368	171.111	1.93333
60011604305	07e0a4f295d5aec7dcb162ecfa662c4d	SCC	0	0	no	83.2857	0	no	female	66	69	160	26.9531	0	0	0	ICI+chemotherapy	Tislelizumab	PD-1	1	0	1	0	0	0	0	0	1	0	0	0	0	0	0	0	0	0	0	0	229	126	8.88	0.45	2.6	0.292793	5.74	0.646396	88.0769	2.20769
60011615481	17457c4e5669f2a14d920566fa0ede8b	adenocarcinoma	0	0	no	87.1429	0	no	male	75	55	160	21.4844	1	0	0	ICI+chemotherapy	Tislelizumab	PD-1	1	0	1	0	0	0	0	1	0	0	0	0	0	0	0	0	0	0	0	0	150	101	5.73	0.86	1.49	0.260035	3.16	0.551483	100.671	2.12081
60011616953	d9019a26c65478b40266670bc1498b40	SCC	0	0	no	100.571	0	no	male	61	72	177	22.9819	1	0	0	ICI+chemotherapy	Toripalimab	PD-1	1	0	1	0	0	0	1	0	0	0	0	0	0	0	0	0	0	0	0	0	208	137	5.76	0.43	1.1	0.190972	4.2	0.729167	189.091	3.81818
60011620402	e5597ab2db77a65b766fd2c044692d3d	SCLC	0	0	no	104.429	0	no	male	60	86	175	28.0816	0	0	0	ICI+chemotherapy	Durvalumab	PD-L1	1	0	0	0	1	0	0	0	1	0	0	0	0	0	0	0	0	0	0	0	263	118	13.78	0.41	0.66	0.0478955	12.61	0.915094	398.485	19.1061
60011629557	5c84aecf085447980acfde3deda1bf27	adenocarcinoma	0	0	no	104.143	0	no	female	57	42	158	16.8242	0	0	0	ICI+chemotherapy	Tislelizumab	PD-1	1	1	0	0	0	0	0	1	0	0	0	0	0	0	0	0	0	0	0	0	199	98	15.88	1.48	1.93	0.121537	11.89	0.748741	103.109	6.16062
60011632033	126389b90a86e868e58cfe8312e49654	SCC	0	0	no	105	0	no	male	77	72	170	24.9135	0	0	0	ICI+chemotherapy+antiangiogenic_therapy	Camilizumab	PD-1	1	0	0	1	0	0	1	0	0	0	0	0	0	1	0	0	1	0	1	0	576	93	11.58	0.96	1.18	0.1019	9.11	0.786701	488.136	7.72034
60011634154	79833ed03c9cc03175b1806e747e3a68	SCC	0	0	no	103.429	0	no	female	61	58	165	21.3039	0	0	0	ICI+chemotherapy+antiangiogenic_therapy	Tislelizumab	PD-1	1	1	0	0	0	0	0	1	0	0	0	0	0	1	0	1	0	0	0	0	358	124	5.47	0.33	1.29	0.235832	3	0.548446	277.519	2.32558
60011638916	88db8f26d298f031bd0445daa8b1b11a	SCC	0	0	no	104.571	0	no	male	77	72	165	26.4463	0	0	0	ICI+chemotherapy+antiangiogenic_therapy	Pembrolizumab	PD-1	1	1	0	0	0	0	0	0	0	0	0	0	0	1	0	1	0	0	1	0	160	127	17.54	0.91	1.46	0.0832383	15.13	0.8626	109.589	10.363
60011643515	b3bff6c77559658c34d59fd35a911481	SCC	0	0	no	105.286	0	no	male	62	68	176	21.9525	0	0	0	ICI+chemotherapy	Pembrolizumab	PD-1	1	1	0	0	0	0	0	1	0	0	0	0	0	0	0	0	0	0	0	0	447	143	7.68	0.87	2.23	0.290365	4.01	0.522135	200.448	1.79821
60011644548	3c3e7d7dd292f83286754034985bc744	SCC	0	0	no	107.143	0	no	male	80	70	165	25.7117	0	0	0	ICI+chemotherapy	Tislelizumab	PD-1	1	0	1	0	0	0	0	0	1	0	0	0	0	0	0	0	0	0	1	0	304	138	6.59	0.62	1.84	0.279211	3.77	0.572079	165.217	2.04891
60011654950	b4a12e64d548b4e5dec8ffeccf8a548b	adenocarcinoma	0	0	no	101.429	0	no	female	34	40	161	15.4315	0	0	0	ICI+chemotherapy+antiangiogenic_therapy	Sintilimab	PD-1	1	1	0	0	0	0	0	1	0	0	0	0	0	1	1	0	0	0	0	0	169	85	4.1	0.53	0.55	0.134146	2.99	0.729268	307.273	5.43636
60011660711	3dd939ab6ed3af34b27dc4070033666b	adenocarcinoma	0	0	no	96.2857	0	no	male	61	50	160	19.5312	1	0	0	ICI+chemotherapy	Tislelizumab	PD-1	1	1	0	0	0	0	0	1	0	0	0	0	0	0	0	0	0	0	0	0	470	74	22.63	1.62	2	0.0883783	18.68	0.825453	235	9.34
60011668372	8a490e130cd052c2a840641faf8b3eb7	SCC	0	0	no	104.714	0	no	male	75	65	167	23.3067	1	1	0	ICI+chemotherapy	Pembrolizumab	PD-1	1	0	1	0	0	0	1	0	1	0	0	0	0	0	0	0	0	0	0	0	281	118	9.29	0.12	1.14	0.122713	7.72	0.831001	246.491	6.77193
60011669510	1bcb1e8154c818dd3b60d8dfe55f64bb	adenocarcinoma	0	0	no	97.8571	0	no	male	60	62	161	23.9188	1	0	0	ICI+chemotherapy	Pembrolizumab	PD-1	1	1	0	0	0	0	0	1	1	0	0	0	0	0	0	0	0	0	0	0	144	139	3.91	0.67	0.98	0.250639	2.21	0.565217	146.939	2.2551
60011673053	967ef9d995166520ce4476787345dbe1	adenocarcinoma	0	0	no	77.2857	0	no	male	62	86	174	28.4053	1	0	0	ICI+chemotherapy+antiangiogenic_therapy	Tislelizumab	PD-1	1	1	0	0	0	0	0	1	0	0	0	0	0	1	1	0	0	0	1	0	301	153	15.69	0.94	2.23	0.142129	11.31	0.720841	134.978	5.07175
60011673309	554b73f6f33501a1e61327225a20e87e	SCLC	0	0	no	103.429	0	no	male	72	57	165	20.9366	0	0	0	ICI+chemotherapy	Atezolizumab	PD-L1	1	0	0	0	1	0	0	1	0	0	0	0	0	0	0	0	0	0	0	0	222	132	5.29	0.33	1.51	0.285444	3.26	0.616257	147.02	2.15894
60011684228	b6708dfc48b17ccd728d7704edfc4c78	SCLC	0	0	no	101	0	no	female	61	53	160	20.7031	0	0	1	ICI+chemotherapy	Sintilimab	PD-1	1	1	0	0	0	0	0	1	0	0	0	0	0	0	0	0	0	0	0	0	171	133	4.08	0.19	1.21	0.296569	2.6	0.637255	141.322	2.14876
60011686114	f9edbc56e7524e1bcdb4bdbad36bdad6	SCC	0	0	no	89.5714	0	no	male	71	45	160	17.5781	0	0	0	ICI+antiangiogenic_therapy	Atezolizumab	PD-L1	0	0	0	0	0	0	0	0	0	0	0	0	0	1	1	0	0	0	0	0	547	75	13.67	1.86	1.27	0.0929042	9.42	0.6891	430.709	7.41732
60011686613	637b624437daf7e4923448b9960b72fe	SCC	1	1	Myocarditis	14	0	no	female	55	61	158	24.4352	0	0	0	ICI+chemotherapy	Tislelizumab	PD-1	1	1	1	0	0	0	0	1	0	0	0	0	0	0	0	0	0	0	0	0	473	116	9.7	0.52	1.16	0.119588	7.97	0.821649	407.759	6.87069
60011688710	b74d4074c34d5b39462ab3d68105befd	SCLC	0	0	no	52.5714	0	no	male	53	75	169	26.2596	1	0	0	ICI+chemotherapy	Tislelizumab	PD-1	1	0	1	0	0	0	0	0	1	0	0	0	0	0	0	0	0	0	0	0	169	142	4.85	0.38	1.38	0.284536	2.89	0.595876	122.464	2.0942
60011699412	1ee93b84cccaec5362d8014226999f42	adenocarcinoma	0	0	no	99.7143	0	no	male	67	62	170	21.4533	1	1	0	ICI+chemotherapy	Sintilimab	PD-1	1	1	0	0	0	0	0	1	0	0	0	0	0	0	0	0	0	0	0	0	530	119	7.21	1.09	2.4	0.332871	3.66	0.507628	220.833	1.525
60011701858	c56ebb2df2662660ad09460eb67d847e	adenocarcinoma	0	0	no	98.8571	0	no	male	59	67	170	23.1834	1	1	1	ICI+chemotherapy+antiangiogenic_therapy	Camilizumab	PD-1	1	1	0	0	0	0	1	0	1	0	0	0	0	1	0	0	1	1	0	0	259	121	5.23	0.69	1.1	0.210325	3.3	0.630975	235.455	3
60011702093	e25598c0726960f15ac9c40490f4325c	adenocarcinoma	0	0	no	35.4286	0	no	male	62	50	162	19.052	1	1	1	ICI+chemotherapy+antiangiogenic_therapy	Sintilimab	PD-1	1	0	1	0	0	0	0	0	1	0	0	0	0	1	1	0	0	0	0	0	308	127	6.05	0.82	1.1	0.181818	3.85	0.636364	280	3.5
60011703081	ed85a0a835ca05f2c7b7c698a34cbd9f	SCLC	0	0	no	101.286	0	no	female	72	65	154	27.4077	0	0	0	ICI+chemotherapy	Tislelizumab	PD-1	1	1	0	0	0	0	1	0	0	0	0	0	0	0	0	0	0	0	1	0	418	128	10.18	0.42	1.94	0.19057	7.72	0.75835	215.464	3.97938
60011705593	c0947ca63c9170b212187ea2dfeb8f85	adenocarcinoma	0	0	no	104.714	0	no	male	64	66	168	23.3844	1	0	0	ICI+chemotherapy	Tislelizumab	PD-1	1	0	1	0	0	0	0	0	1	0	0	0	0	0	0	0	0	0	0	0	266	121	5.86	0.58	1.38	0.235495	3.61	0.616041	192.754	2.61594
60011706317	d445da42f06ad92f14ae2c2e0b4e0d14	SCC	0	0	no	104.571	0	no	male	71	60	172	20.2812	0	0	0	ICI+chemotherapy	Sintilimab	PD-1	1	0	0	1	0	0	1	0	0	0	0	0	0	0	0	0	0	0	0	0	184	140	5.76	0.51	1.14	0.197917	3.88	0.673611	161.404	3.40351
60011709072	c26f48571b7629828d7f21638c43ef78	adenocarcinoma	0	0	no	104.857	0	no	male	56	66	163	24.841	1	1	0	ICI+chemotherapy+antiangiogenic_therapy	Tislelizumab	PD-1	1	1	0	0	0	0	1	0	0	0	0	0	0	1	1	0	0	0	0	0	224	143	7.64	0.59	2.29	0.299738	4.4	0.575916	97.8166	1.9214
60011709225	c5ed02cd4ce9724a012ac28276f6ee53	SCC	1	1	Myocarditis	6	0	no	male	61	63	165	23.1405	1	0	0	ICI+chemotherapy+antiangiogenic_therapy	Atezolizumab	PD-L1	1	1	0	0	0	0	0	1	0	0	0	0	0	1	1	0	0	0	1	0	300	146	15.64	1.37	1.1	0.0703325	12.51	0.799872	272.727	11.3727
60011712954	042eeb79bb560fba199f3e084e8fa19a	SCC	0	0	no	83.5714	0	no	male	70	80	172	27.0416	1	0	0	ICI+chemotherapy	Pembrolizumab	PD-1	1	0	1	0	0	0	0	1	0	0	0	0	0	0	0	0	0	0	0	0	185	160	6.2	0.62	1.34	0.216129	4.05	0.653226	138.06	3.02239
60011717369	fee4838ef3ca0b95b53fdc2ee4044b2b	adenocarcinoma	0	0	no	98.4286	0	no	male	60	50	166	18.1449	1	1	0	ICI+chemotherapy+antiangiogenic_therapy	Pembrolizumab	PD-1	1	1	1	0	0	0	0	1	0	0	0	0	0	1	0	1	0	0	0	0	347	107	10.31	0.97	1.37	0.132881	7.92	0.768186	253.285	5.78102
60011719395	37148c447e5c5ae4b8431daa8352978d	adenocarcinoma	0	0	no	104.571	0	no	female	65	52	150	23.0222	0	0	0	ICI+chemotherapy	Tislelizumab	PD-1	1	0	1	0	0	0	0	0	1	0	0	0	0	0	0	0	0	0	1	0	22	109	4.1	0.27	1.5	0.365854	2.19	0.534146	14.6667	1.46
60011738440	60b29239acb8242d68be8544c0b9d57e	adenocarcinoma	0	0	no	87	0	no	male	55	62	160	24.2188	1	0	0	ICI+chemotherapy	Durvalumab	PD-L1	1	0	1	0	0	0	0	0	0	0	0	0	0	0	0	0	0	0	0	0	193	116	4.81	0.48	0.65	0.135135	3.62	0.752599	296.923	5.56923
60011747190	6512f30edc62bbd16401be8f691b29b6	adenocarcinoma	0	0	no	103.857	0	no	male	61	68	168	24.093	1	0	0	ICI+chemotherapy	Durvalumab	PD-L1	1	0	0	0	1	0	1	1	0	0	0	0	0	0	0	0	0	0	0	0	173	126	4.91	0.34	2.01	0.409369	2.4	0.488798	86.0697	1.19403
60011753673	4c88db3982c9b15baa5cc07e29e6c0b1	adenocarcinoma	0	0	no	74.8571	0	no	male	58	71	173	23.7228	1	1	0	ICI+chemotherapy	Tislelizumab	PD-1	1	0	0	0	0	0	0	1	0	0	0	0	0	0	0	0	0	0	0	0	215	127	8.67	0.77	1.61	0.185698	5.89	0.679354	133.54	3.65839
60011759869	2d0feedd677ddc04df5469958ad9b154	adenocarcinoma	0	0	no	103.571	0	no	male	59	54	160	21.0938	1	0	0	ICI+chemotherapy	Durvalumab	PD-L1	1	0	0	0	1	0	0	1	0	0	0	0	0	0	0	0	0	0	0	0	197	146	6.16	0.28	1.41	0.228896	4.34	0.704545	139.716	3.07801
60011770144	48ee26b6bf5f4cb5badd636f93153803	adenocarcinoma	0	0	no	102.286	0	no	male	64	75	175	24.4898	1	1	0	ICI+chemotherapy	Durvalumab	PD-L1	1	0	0	0	1	0	0	0	1	0	0	0	0	0	0	0	0	0	0	0	250	110	4.99	0.38	0.8	0.160321	3.49	0.699399	312.5	4.3625
60011771918	7462fe4ee6a270252e50603163fa9bed	adenocarcinoma	0	0	no	94.1429	0	no	male	54	50	157	20.2848	1	1	0	ICI	Sintilimab	PD-1	0	0	0	0	0	0	0	0	0	0	0	0	0	0	0	0	0	0	0	0	643	80	14.98	1.58	2.18	0.145527	11.19	0.746996	294.954	5.13303
60011781285	8f237163e5a4655725077849a8658462	adenocarcinoma	0	0	no	83.8571	0	no	male	58	69	176	22.2753	1	0	0	ICI+chemotherapy	Tislelizumab	PD-1	1	0	1	0	0	0	0	0	1	0	0	0	0	0	0	0	0	0	0	0	250	146	4.84	0.39	1.78	0.367769	2.56	0.528926	140.449	1.4382
60011791814	bef23be0c444a8856e166bd795cd83d4	adenocarcinoma	0	0	no	84.7143	0	no	male	69	54	153	23.0681	1	1	0	ICI+chemotherapy	Pembrolizumab	PD-1	1	0	1	0	0	0	0	0	0	0	0	0	0	0	0	0	0	0	1	0	234	126	7.83	0.63	0.92	0.117497	4.94	0.630907	254.348	5.36957
60011795646	9a30f9eba6b76ce86964af8725120e24	adenocarcinoma	0	0	no	98.8571	0	no	male	53	68	170	23.5294	0	0	0	ICI+chemotherapy	Tislelizumab	PD-1	1	1	0	0	0	0	0	1	0	0	0	0	0	0	0	0	0	0	0	0	248	124	4.73	0.43	1.11	0.234672	2.85	0.602537	223.423	2.56757
60011799818	865e9c34053be880beca88fd3204259b	adenocarcinoma	0	0	no	57.5714	0	no	male	56	72	158	28.8415	1	1	0	ICI+chemotherapy	Tislelizumab	PD-1	1	0	1	0	0	0	0	0	1	0	0	0	0	0	0	0	0	0	0	0	396	115	8.69	0.55	0.81	0.0932106	7.15	0.822785	488.889	8.82716
60011802875	4888cf7aa1787051b58b4c4c50b1ecc8	adenocarcinoma	0	0	no	81.7143	0	no	male	62	53	168	18.7783	1	1	0	ICI+chemotherapy	Tislelizumab	PD-1	1	1	0	0	0	0	1	0	0	0	0	0	0	0	0	0	0	0	0	0	583	86	11.49	1.11	1.86	0.16188	8.43	0.733681	313.441	4.53226
60011810580	b162f40f7e3dc13ebe44b0131a5600f4	adenocarcinoma	0	0	no	98.8571	0	no	male	68	70	168	24.8016	0	0	0	ICI+chemotherapy	Tislelizumab	PD-1	1	0	1	0	0	0	0	0	1	0	0	0	0	0	0	0	0	0	0	0	245	134	5.16	0.57	1.4	0.271318	2.85	0.552326	175	2.03571
60011815441	81e2400a68c77709d813e405d1dd5aec	adenocarcinoma	0	0	no	96.1429	0	no	male	77	56	165	20.5693	1	0	0	ICI+chemotherapy	Durvalumab	PD-L1	1	0	0	0	1	0	0	1	0	0	0	0	0	0	0	0	0	0	0	0	298	134	13.74	0.86	2.09	0.152111	10.68	0.777293	142.584	5.11005
60011815497	c2ceeb4c0c62bcbe01012e28eb0e9b35	adenocarcinoma	0	0	no	102.286	0	no	male	60	65	173	21.7181	1	0	0	ICI+chemotherapy	Tislelizumab	PD-1	1	0	0	0	0	0	1	0	0	0	0	0	0	0	0	0	0	0	0	0	208	131	6.73	0.53	1.52	0.225854	4.47	0.66419	136.842	2.94079
60011816279	99fc9b71032984ee0ec6393c98879010	adenocarcinoma	0	0	no	44.1429	0	no	male	67	47	169	16.456	1	0	0	ICI+chemotherapy	Sintilimab	PD-1	1	0	1	0	0	0	0	0	0	0	0	0	0	0	0	0	0	1	1	0	302	143	8.68	0.84	1.56	0.179724	6.03	0.6947	193.59	3.86538
60011819901	dbd5cd107ad79f223b372a8b7c3f4cdd	adenocarcinoma	0	0	no	93.8571	0	no	male	58	90	168	31.8878	1	0	0	ICI+chemotherapy	Tislelizumab	PD-1	1	0	1	0	0	0	0	1	0	0	0	0	0	0	0	0	0	0	0	0	249	126	5.48	0.62	2.06	0.375912	2.78	0.507299	120.874	1.34951
60011822525	47c03ae951b54776ab13248fbcb421fe	adenocarcinoma	0	0	no	97.4286	0	no	male	57	79	180	24.3827	1	1	0	ICI+chemotherapy	Sintilimab	PD-1	1	0	1	0	0	0	0	1	0	0	0	0	0	0	0	0	0	0	1	0	424	143	8.71	0.64	1.89	0.216992	5.94	0.681975	224.339	3.14286
60011823705	b668c91f73d867cf899adf366ea01d60	adenocarcinoma	0	0	no	101.857	0	no	male	69	60	168	21.2585	1	0	0	ICI+chemotherapy	Durvalumab	PD-L1	1	0	0	0	1	0	0	1	0	0	0	0	0	0	0	0	0	0	0	0	237	108	5.41	0.49	1.13	0.208872	3.7	0.683919	209.735	3.27434
60011837717	9ea7f22ef7ea49332c6de191d269980c	adenocarcinoma	0	0	no	94.5714	0	no	male	64	58	156	23.833	1	0	0	ICI+chemotherapy	Tislelizumab	PD-1	1	0	1	0	0	0	0	1	0	0	0	0	0	0	0	0	0	0	0	0	252	118	10.73	0.18	0.98	0.0913327	9.56	0.89096	257.143	9.7551
60011838128	66dd267d034d8d914a37b28e1966a928	adenocarcinoma	0	0	no	95.8571	0	no	male	71	78	175	25.3061	1	0	0	ICI+chemotherapy	Pembrolizumab	PD-1	1	1	0	0	0	0	0	1	0	0	0	0	0	0	0	0	0	0	0	0	378	126	10.82	0.87	2.62	0.242144	6.74	0.622921	144.275	2.57252
60011840122	9ecac05f75369320effdc5abf5d48868	adenocarcinoma	0	0	no	96.7143	0	no	male	63	57	172	19.2672	0	0	1	ICI+chemotherapy	Pembrolizumab	PD-1	1	1	0	0	0	0	0	1	0	0	0	0	0	0	0	0	0	1	0	0	171	90	11.49	0.93	1.1	0.0957354	9.37	0.815492	155.455	8.51818
60011853688	2206611b0c3353a844f56074b9ea89ca	adenocarcinoma	0	0	no	36.5714	0	no	male	57	72	175	23.5102	0	0	0	ICI+chemotherapy	Tislelizumab	PD-1	1	1	1	0	0	0	0	0	0	0	0	0	0	0	0	0	0	0	0	0	123	134	6.13	0.46	1	0.163132	4.64	0.756933	123	4.64
60011862462	bed475e4de33312a883aee0aec091e54	adenocarcinoma	0	0	no	100.857	0	no	male	60	73	168	25.8645	0	0	0	ICI+chemotherapy+antiangiogenic_therapy	Pembrolizumab	PD-1	1	1	0	0	0	0	1	0	0	0	0	0	0	1	1	0	0	0	1	0	284	149	7.03	0.6	2.54	0.361309	3.54	0.503556	111.811	1.3937
60011863595	7fd7c3d9499b0056feb5ee2cd542be89	adenocarcinoma	0	0	no	100.857	0	no	male	62	49	164	18.2183	1	1	0	ICI+chemotherapy	Tislelizumab	PD-1	1	1	0	0	0	0	0	1	1	0	0	0	0	0	0	0	0	0	0	0	531	98	12.53	1.18	1.52	0.121309	9.49	0.757382	349.342	6.24342
60011865119	07f4fb68f70c74e801283ef2ce9d293d	adenocarcinoma	0	0	no	95.8571	0	no	male	80	55	155	22.8928	1	1	0	ICI+chemotherapy+antiangiogenic_therapy	Durvalumab	PD-L1	1	0	0	0	1	0	0	1	0	0	0	0	0	1	0	0	1	0	0	0	322	120	10.46	0.63	1.86	0.17782	7.6	0.726577	173.118	4.08602
60011876394	25beb44d84c38ffbd9e3c8ecc4818bfa	SCC	0	0	no	92.7143	0	no	male	63	70	177	22.3435	1	0	0	ICI+chemotherapy+antiangiogenic_therapy	Tislelizumab	PD-1	1	0	1	0	0	0	1	0	0	0	0	0	0	1	0	0	1	1	1	0	180	106	4.03	0.38	1.26	0.312655	2.2	0.545906	142.857	1.74603
60011882459	c329092c1204809a7ad2e25cf8ad6b22	SCC	0	0	no	100	0	no	male	60	47	165	17.2635	1	1	0	ICI+chemotherapy	Sintilimab	PD-1	1	0	0	1	0	0	0	1	0	0	0	0	0	0	0	0	0	0	0	0	247	87	7.69	0.44	1.97	0.256177	5.24	0.681404	125.381	2.6599
60011886865	b12dce4b306cafc52908ad389c12adf7	adenocarcinoma	0	0	no	89.8571	0	no	male	31	50	167	17.9282	1	0	0	ICI+chemotherapy	Tislelizumab	PD-1	1	1	0	0	0	0	0	0	0	0	0	0	0	0	0	0	0	0	0	0	202	104	22.39	2.33	2.14	0.0955784	17.79	0.794551	94.3925	8.31308
60011889476	2465d4e07d0a0886dca3fadd3fddd4af	adenocarcinoma	0	0	no	28.8571	0	no	male	51	58	172	19.47	1	0	0	ICI+chemotherapy	Durvalumab	PD-L1	1	1	0	0	0	0	0	0	1	0	0	0	0	0	0	0	0	0	0	0	291	148	11.92	0.81	1.76	0.147651	8.59	0.720638	165.341	4.88068
60011893791	a3870ef0f59d24a1d66bf6801ccb3a9e	adenocarcinoma	0	0	no	99.7143	0	no	male	70	59	180	18.2099	0	0	0	ICI+chemotherapy	Sintilimab	PD-1	1	0	0	1	0	0	1	0	0	0	0	0	0	0	0	0	0	0	0	0	273	109	8.17	0.81	1.97	0.241126	5.23	0.640147	138.579	2.65482
60011899170	1ca56f5a555781a0ef98660756a20916	adenocarcinoma	0	0	no	93.4286	0	no	male	56	69	172	23.3234	1	1	0	ICI+chemotherapy	Pembrolizumab	PD-1	1	0	1	0	0	0	0	1	0	0	0	0	0	0	0	0	0	0	0	0	186	127	7.97	0.77	1.81	0.227102	4.96	0.622334	102.762	2.74033
60011901975	519bf15714453bc264f61849acae2d0c	SCC	0	0	no	97.8571	0	no	male	62	54	157	21.9076	1	0	0	ICI+chemotherapy	Tislelizumab	PD-1	1	0	1	0	0	0	0	1	0	0	0	0	0	0	0	0	0	0	0	0	141	123	3.96	0.27	0.94	0.237374	2.6	0.656566	150	2.76596
60011902299	54109ec8d8f27aaa11ae075855b8db7b	SCC	0	0	no	99.7143	0	no	male	61	61	170	21.1073	0	0	1	ICI+chemotherapy+antiangiogenic_therapy	Pembrolizumab	PD-1	1	0	1	0	0	0	0	1	0	0	0	0	0	1	0	0	1	1	0	0	362	121	9.71	0.6	0.95	0.0978373	8.03	0.826982	381.053	8.45263
60011904695	b950fd36768a79d012916d17de4921ed	SCLC	0	0	no	99.5714	0	no	male	56	64	168	22.6757	1	0	1	ICI+chemotherapy	Durvalumab	PD-L1	1	0	0	0	1	0	0	1	0	0	0	0	0	0	0	0	0	0	0	0	258	140	5.86	0.3	1.82	0.31058	3.63	0.619454	141.758	1.99451
60011907417	9208cdcd67d52c1546a126e2ba17eb38	SCLC	0	0	no	97.8571	0	no	male	63	62	167	22.231	0	0	0	ICI+chemotherapy	Durvalumab	PD-L1	1	0	0	0	1	0	1	0	0	0	0	0	0	0	0	0	0	0	0	0	388	120	7.1	0.55	1.65	0.232394	4.69	0.660563	235.152	2.84242
60011909866	9d10774f510df76a5a7176401843e5ea	SCLC	0	0	no	99.5714	0	no	male	67	73	175	23.6735	0	0	0	ICI+chemotherapy+antiangiogenic_therapy	Durvalumab	PD-L1	1	0	0	0	1	1	0	1	0	0	0	0	0	1	0	1	0	0	0	0	154	148	5.13	0.25	1.27	0.247563	3.39	0.660819	121.26	2.66929
60011913225	ad792c4f0f89aad62fbac8aa90b54d2c	SCLC	0	0	no	49.2857	0	no	male	52	75	174	24.7721	1	1	0	ICI+chemotherapy	Atezolizumab	PD-L1	1	0	0	0	1	1	1	1	0	0	0	0	0	0	0	0	0	0	0	0	213	140	9.77	0.29	1.72	0.176049	7.73	0.791198	123.837	4.49419
60011930334	de49f482855d9f1b73b18b34f2127944	SCC	0	0	no	94.7143	0	no	male	72	75	165	27.5482	1	1	0	ICI+chemotherapy	Pembrolizumab	PD-1	1	1	0	0	0	0	0	0	1	0	0	0	0	0	0	0	0	0	0	0	186	137	6.34	0.41	2.04	0.321767	3.46	0.545741	91.1765	1.69608
60011938918	05121f8aeb656227cf441ffe0ea2a44a	adenocarcinoma	0	0	no	27.8571	0	no	male	53	70	175	22.8571	0	0	0	ICI+chemotherapy	Pembrolizumab	PD-1	1	1	0	0	0	0	0	0	0	0	0	0	0	0	0	0	0	0	1	0	209	120	10.64	1.32	1.91	0.179511	6.24	0.586466	109.424	3.26702
60011940355	d44ca2661f69ec0437cc2e1c37ad7e6a	adenocarcinoma	0	0	no	90	0	no	male	65	62	164	23.0518	1	0	0	ICI+chemotherapy	Camilizumab	PD-1	1	0	1	0	0	0	1	0	0	0	0	0	0	0	0	0	0	0	0	0	248	123	8.31	0.39	1.73	0.208183	6.05	0.728039	143.353	3.49711
60011942597	275dad782cb5667982b8f56473f92891	SCC	1	1	Myocarditis	52	0	no	male	79	63	160	24.6094	1	0	0	ICI+chemotherapy	Tislelizumab	PD-1	1	0	1	0	0	0	1	0	0	0	0	0	0	0	0	0	0	0	1	0	122	150	5.91	0.07	1.28	0.216582	4.49	0.759729	95.3125	3.50781
60011945958	3bf3c3434e44bab45666fedd1e59e401	adenocarcinoma	0	0	no	97.7143	0	no	male	56	70	172	23.6614	1	0	0	ICI+chemotherapy	Pembrolizumab	PD-1	1	0	0	0	0	0	0	1	0	0	0	0	0	0	0	0	0	0	0	0	223	138	5.89	0.36	1.65	0.280136	3.28	0.556876	135.152	1.98788
60011952417	2fbf6a8cc399b082cbc3c07b9f44e8d1	SCLC	0	0	no	98.2857	0	no	male	72	70	168	24.8016	0	0	0	ICI+chemotherapy+antiangiogenic_therapy	Pembrolizumab	PD-1	1	1	0	0	0	0	1	1	0	0	0	0	0	1	0	0	1	0	0	0	381	123	7.65	0.54	2.02	0.264052	4.87	0.636601	188.614	2.41089
60011956612	303077d60fb7f52948d841af735373b8	SCLC	0	0	no	97.8571	0	no	male	71	56	163	21.0772	1	0	0	ICI+chemotherapy	Tislelizumab	PD-1	1	0	0	0	1	1	1	1	0	0	0	0	0	0	0	0	0	0	0	0	179	153	6.12	0.56	1.82	0.297386	3.66	0.598039	98.3516	2.01099
60011957401	e1158a05f1dbfda0f7803d20e9a89766	SCC	0	0	no	98.2857	0	no	male	63	75	159	29.6665	1	1	0	ICI+chemotherapy	Pembrolizumab	PD-1	1	0	1	0	0	0	1	0	0	0	0	0	0	0	0	0	0	1	1	0	333	118	6.04	0.31	1.24	0.205298	4.44	0.735099	268.548	3.58065
60011965326	541a828a3945d148557f543aa2446d6d	adenocarcinoma	0	0	no	91.4286	0	no	male	59	57	167	20.4382	1	0	0	ICI+chemotherapy	Sintilimab	PD-1	1	1	0	0	0	0	1	0	0	0	0	0	0	0	0	0	0	0	0	0	265	117	5.71	0.06	0.97	0.169877	4.67	0.817863	273.196	4.81443
60011965458	5053306fbbcb17231163161583ccaf3e	adenocarcinoma	0	0	no	72.1429	0	no	male	73	68	170	23.5294	1	0	0	ICI+chemotherapy	Tislelizumab	PD-1	1	1	0	0	0	0	0	1	0	0	0	0	0	0	0	0	0	0	0	0	238	128	3.69	0.53	0.8	0.216802	2.27	0.615176	297.5	2.8375
60011966140	4056523c1aad1d4f12ad1886c56a8c1b	SCLC	0	0	no	55.2857	0	no	male	67	57	158	22.8329	1	1	0	ICI+chemotherapy+antiangiogenic_therapy	Durvalumab	PD-L1	1	0	0	0	0	1	0	0	0	0	0	0	0	1	1	0	0	0	0	0	186	104	8.12	0.64	1.67	0.205665	5.8	0.714286	111.377	3.47305
60011967942	028362f0ac86f7780be949fc5e95ceec	adenocarcinoma	1	1	Arrhythmia	3	1	Left Anterior Fascicular Block (LAFB)	male	71	78	173	26.0617	1	0	0	ICI+chemotherapy	Tislelizumab	PD-1	1	0	1	0	0	0	0	0	1	0	0	0	0	0	0	0	0	0	0	0	256	148	7.12	0.72	1.56	0.219101	4.63	0.650281	164.103	2.96795
60011969126	a6bdca41be3b139fd8d276e93b17eaf1	SCLC	0	0	no	98	0	no	male	70	54	166	19.5965	1	1	0	ICI+chemotherapy	Tislelizumab	PD-1	1	0	0	0	1	0	0	1	0	0	0	0	0	0	0	0	0	0	0	0	191	168	8.71	0.64	2.2	0.252583	5.56	0.638347	86.8182	2.52727
60011971230	f6e01326870bfb69b952c90146c380ad	SCC	0	0	no	97.8571	0	no	male	67	56	164	20.8209	1	0	0	ICI+chemotherapy	Tislelizumab	PD-1	1	0	0	0	1	0	0	1	0	0	0	0	0	0	0	0	0	0	0	0	445	96	10.03	1.22	1.41	0.140578	7.19	0.716849	315.603	5.09929
60011975993	419a2bf05954964aab1b64039d3f4b9e	adenocarcinoma	0	0	no	93.7143	0	no	female	60	58	164	21.4158	0	0	0	ICI+chemotherapy	Tislelizumab	PD-1	1	1	0	0	0	0	0	1	0	0	0	0	0	0	0	0	0	0	0	0	245	118	6.02	0.49	1.85	0.307309	3.47	0.576412	132.432	1.87568
60011976329	361d45253278eab444976ead60ded9d9	adenocarcinoma	0	0	no	92.5714	0	no	male	64	69	175	22.5306	1	0	0	ICI+chemotherapy+antiangiogenic_therapy	Camilizumab	PD-1	1	0	0	1	0	0	0	1	0	0	0	0	0	1	0	1	0	0	0	0	397	123	20.6	1.39	2.98	0.14466	14.43	0.700485	133.221	4.84228
60011976502	6f2fdab33dcd2c78b562c2ba4b4b8833	adenocarcinoma	0	0	no	97.4286	0	no	male	82	43	152	18.6115	1	0	0	ICI+chemotherapy	Pembrolizumab	PD-1	1	0	1	0	0	0	0	1	0	0	0	0	0	0	0	0	0	0	0	0	246	94	6.32	0.52	1.97	0.311709	3.54	0.560127	124.873	1.79695
60011979353	0f0f36c3b662fa3ec583a0b5c487937d	adenocarcinoma	0	0	no	92.1429	0	no	female	48	57	152	24.6711	0	0	0	ICI+chemotherapy	Pembrolizumab	PD-1	1	1	0	0	0	0	0	1	0	0	0	0	0	0	0	0	0	0	0	0	330	112	5.93	0.44	0.8	0.134907	4.59	0.77403	412.5	5.7375
60011980618	e5a901739d07f9062a9148b6fa95c29b	SCC	0	0	no	73.1429	0	no	male	57	71	166	25.7657	1	0	0	ICI+chemotherapy	Durvalumab	PD-L1	1	0	0	0	0	1	1	0	0	0	0	0	0	0	0	0	0	0	1	0	285	118	5.22	0.58	0.91	0.17433	1.68	0.321839	313.187	1.84615
60011981043	e79094a3930c35b509faf1e5ddcee57a	SCC	0	0	no	51.4286	0	no	male	67	63	168	22.3214	0	0	0	ICI+chemotherapy	Sintilimab	PD-1	1	1	0	0	0	0	0	0	1	0	0	0	0	0	0	0	0	0	0	0	325	131	6.67	0.05	0.84	0.125937	5.77	0.865067	386.905	6.86905
60011982066	89fcaa319713aadad3c5c3a5c02a35c7	adenocarcinoma	0	0	no	92.4286	0	no	male	52	68	173	22.7204	0	0	0	ICI+chemotherapy	Pembrolizumab	PD-1	1	1	0	0	0	0	0	1	0	0	0	0	0	0	0	0	0	0	0	0	284	133	9.14	0.53	1.81	0.198031	6.67	0.729759	156.906	3.68508
60011985305	c3111711d7cca4e02638db593f137f5d	SCLC	0	0	no	97.5714	0	no	male	49	72	172	24.3375	1	0	0	ICI+chemotherapy	Durvalumab	PD-L1	1	0	0	0	1	0	0	1	0	0	0	0	0	0	0	0	0	0	0	0	295	153	7.14	0.6	1.63	0.228291	4.8	0.672269	180.982	2.94479
60011990416	54feb2d7bd357d1cbd4802c539727fd0	SCC	0	0	no	87.5714	0	no	male	70	53	163	19.7599	0	0	0	ICI+chemotherapy	Tislelizumab	PD-1	1	0	1	0	0	0	0	0	1	0	0	0	0	0	0	0	0	0	0	0	305	129	7.3	0.65	1.35	0.184932	4.83	0.661644	225.926	3.57778
60011995580	3bb4263c444fbd0db80393b0fb25bf28	SCLC	0	0	no	96.4286	0	no	male	55	67	175	21.8776	1	0	0	ICI+chemotherapy	Durvalumab	PD-L1	1	0	0	0	1	1	1	1	0	0	0	0	0	0	0	0	0	0	0	0	155	135	4.44	0.52	1.73	0.38964	2.15	0.484234	89.5954	1.24277
60012001225	9b177dc8299390725752e190a75835f4	SCC	0	0	no	91.8571	0	no	male	58	64	174	21.1389	1	0	0	ICI+chemotherapy	Pembrolizumab	PD-1	1	0	1	0	0	0	0	1	0	0	0	0	0	0	0	0	0	0	0	0	320	117	8.32	0.48	1.9	0.228365	5.69	0.683894	168.421	2.99474
60012007388	9a3cd4255219dfdbdeeb956ad9ef17f9	adenocarcinoma	0	0	no	96.2857	0	no	male	74	66	166	23.9512	1	0	0	ICI+chemotherapy	Pembrolizumab	PD-1	1	1	0	0	0	0	0	1	0	0	0	0	0	0	0	0	0	0	0	0	146	136	5.95	0.59	1.26	0.211765	3.83	0.643697	115.873	3.03968
60012012150	714be53e0f6ed9309c0120967ba64d2e	SCLC	0	0	no	96.7143	0	no	male	68	59	160	23.0469	1	0	0	ICI+chemotherapy+antiangiogenic_therapy	Durvalumab	PD-L1	1	0	0	0	1	0	1	1	0	0	0	0	0	1	0	1	0	0	0	0	161	147	4.44	0.06	2.56	0.576577	1.79	0.403153	62.8906	0.699219
60012015807	f86afe34e644f55d59664a03d2a3dda7	SCC	0	0	no	91.1429	0	no	male	71	53	162	20.1951	1	1	0	ICI+chemotherapy	Tislelizumab	PD-1	1	0	0	1	0	0	0	1	0	0	0	0	0	0	0	0	0	0	0	0	325	132	9.15	0.56	1.17	0.127869	6.83	0.746448	277.778	5.83761
60012022342	f70f6d16a673fa7343239f980b8ad343	SCC	0	0	no	90.5714	0	no	female	61	55	169	19.257	0	0	0	ICI+chemotherapy	Tislelizumab	PD-1	1	0	1	0	0	0	0	0	1	0	0	0	0	0	0	0	0	0	0	0	423	116	9.17	0.61	1.7	0.185387	6.82	0.74373	248.824	4.01176
60012027852	66babb265340747f1f5c41f64f376535	adenocarcinoma	0	0	no	75	0	no	female	65	64	166	23.2254	1	0	0	ICI+chemotherapy+antiangiogenic_therapy	Camilizumab	PD-1	1	1	1	0	0	0	1	0	1	0	0	0	0	1	0	0	1	0	0	0	401	111	10.77	0.82	1.5	0.139276	8.22	0.763231	267.333	5.48
60012033887	2d98f473c97497415b53007d6b8e8238	sarcomatoid carcinoma	0	0	no	91.4286	0	no	male	62	62	160	24.2188	1	0	0	ICI	Camilizumab	PD-1	0	0	0	0	0	0	0	0	0	0	0	0	0	0	0	0	0	0	0	0	314	125	9.93	1.01	2.43	0.244713	6.35	0.639476	129.218	2.61317
60012036394	4f0d3affbdc056a47fe086f90725b8d0	SCC	0	0	no	95.1429	0	no	female	59	75	168	26.5731	0	0	0	ICI+chemotherapy	Tislelizumab	PD-1	1	0	1	0	0	0	1	0	0	0	0	0	0	0	0	0	0	1	0	0	301	129	6.77	0.37	1.83	0.27031	4.46	0.658789	164.481	2.43716
60012037849	381b3c0992c49f0b2d028e646fd798f9	SCLC	0	0	no	95.4286	0	no	male	72	81	169	28.3604	1	0	0	ICI+chemotherapy	Durvalumab	PD-L1	1	0	0	0	1	1	1	0	1	0	0	0	0	0	0	0	0	0	1	0	289	121	6.73	0.76	1.6	0.237741	4.3	0.63893	180.625	2.6875
60012039783	4f7af2eb31ae099ce6cc4aa7b8562176	SCC	0	0	no	85.7143	0	no	male	66	65	155	27.0552	1	0	0	ICI+chemotherapy	Tislelizumab	PD-1	1	0	1	0	0	0	0	1	0	0	0	0	0	0	0	0	0	0	1	0	274	130	10.11	0.52	1.92	0.189911	7.41	0.732938	142.708	3.85938
60012040593	5f4bd1ad0fe123cf4bc57b765e553bf2	SCC	0	0	no	78.5714	0	no	male	54	69	177	22.0243	1	1	0	ICI+chemotherapy	Sintilimab	PD-1	1	1	0	0	0	0	0	0	1	0	0	0	0	0	0	0	0	0	0	0	275	167	10.49	0.41	1.81	0.172545	7.25	0.691134	151.934	4.00552
60012041922	c9bbad28402ca9ef22df4f6b3c4d4c48	SCC	1	1	Myocarditis	6	0	no	male	67	54	169	18.9069	1	0	0	ICI+chemotherapy	Tislelizumab	PD-1	1	0	1	0	0	0	0	0	0	0	0	0	0	0	0	0	0	0	1	0	286	135	7.08	0.66	1.48	0.20904	4.52	0.638418	193.243	3.05405
60012046493	fdf5c3fb71ff3ad4c7336af802c36302	SCC	0	0	no	90.8571	0	no	male	58	79	183	23.4405	1	0	0	ICI+chemotherapy	Tislelizumab	PD-1	1	0	1	1	0	0	1	1	1	0	0	0	0	0	0	0	0	0	0	0	255	129	6.25	0.64	1.85	0.296	3.71	0.5936	137.838	2.00541
60012052763	d39a6fc26e9bbc19a1e3ea6d278ba2c1	SCC	0	0	no	89	0	no	male	74	55	154	23.1911	1	0	0	ICI+chemotherapy	Tislelizumab	PD-1	1	0	1	0	0	0	0	0	0	0	0	0	0	0	0	0	0	0	0	0	255	109	7.29	0.6	1.03	0.141289	5.06	0.694102	247.573	4.91262
60012057041	c3d2bec7453b1f70b68807bbddc3bacf	SCC	0	0	no	88.5714	0	no	male	46	85	165	31.2213	1	0	0	ICI+chemotherapy	Sintilimab	PD-1	1	0	0	1	0	0	1	0	0	0	0	0	0	0	0	0	0	0	0	0	273	128	5.28	0.56	1.95	0.369318	2.5	0.473485	140	1.28205
60012062022	1585e910573bf6d7d24f19308f978d88	SCC	0	0	no	90.4286	0	no	male	53	65	175	21.2245	0	0	0	ICI+chemotherapy	Tislelizumab	PD-1	1	0	1	0	0	0	0	1	0	0	0	0	0	0	0	0	0	0	0	0	248	113	5.83	0.39	1.39	0.238422	3.7	0.634648	178.417	2.66187
60012062767	e190839726e2a34a6ee6965b64eeaf5e	SCC	0	0	no	95.2857	0	no	male	70	73	176	23.5666	1	0	0	ICI+chemotherapy	Tislelizumab	PD-1	1	0	1	0	0	0	1	0	0	0	0	0	0	0	0	0	0	0	1	0	278	143	9.53	0.92	1.36	0.142707	7.06	0.740818	204.412	5.19118
60012064299	3e8eb27c1ece81ac3055add283812f71	LCC	0	0	no	61	0	no	male	64	70	168	24.8016	1	0	0	ICI+chemotherapy	Pembrolizumab	PD-1	1	0	0	0	0	1	0	1	0	0	0	0	0	0	0	0	0	0	0	0	300	143	5.36	0.41	1.19	0.222015	3.67	0.684701	252.101	3.08403
60012064884	c6bf6ba7bcf3a421333ae7c0868a2825	NSCLC	0	0	no	31.1429	0	no	male	58	61	170	20.9343	0	0	0	ICI+chemotherapy	Tislelizumab	PD-1	1	1	0	0	0	0	0	0	0	0	0	0	0	0	0	0	0	0	0	0	153	119	4.26	0.75	0.82	0.192488	2.53	0.593897	186.585	3.08537
60012070031	2cc51950df91cde665e0505fdf7722dc	adenocarcinoma	0	0	no	91	0	no	male	58	80	178	25.2493	1	0	0	ICI+chemotherapy	Tislelizumab	PD-1	1	1	0	0	0	0	0	0	1	0	0	0	0	0	0	0	0	0	0	0	180	136	8.34	0.62	1.62	0.194245	5	0.59952	111.111	3.08642
60012082556	727eaab14fd7f992acc91a20ced8e9f8	SCLC	0	0	no	94.8571	0	no	male	68	62	162	23.6244	1	1	0	ICI+chemotherapy	Durvalumab	PD-L1	1	0	0	0	1	0	1	0	0	0	0	0	0	0	0	0	0	0	0	0	235	126	5.87	0.27	1.37	0.23339	3.99	0.679727	171.533	2.91241
60012083218	c20cefe14df3ca823b2dcd1406a6baec	adenocarcinoma	0	0	no	88.4286	0	no	female	53	59	155	24.5578	0	0	0	ICI+chemotherapy+antiangiogenic_therapy	Sintilimab	PD-1	1	1	0	0	0	0	0	1	0	0	0	0	0	1	1	0	0	0	0	0	230	114	9.26	0.58	1.72	0.185745	6.89	0.74406	133.721	4.00581
60012083662	37b42a9bbddc1e4d358b9063dffa8d7a	adenocarcinoma	0	0	no	78.4286	0	no	male	60	59	178	18.6214	1	1	0	ICI+antiangiogenic_therapy	Tislelizumab	PD-1	0	0	0	0	0	0	0	0	0	0	0	0	0	1	0	1	0	0	0	0	105	112	6.14	0.47	1.76	0.286645	3.86	0.628664	59.6591	2.19318
60012087276	60860a7878021233966c23e46d4ef36b	SCC	0	0	no	85.8571	0	no	male	64	58	175	18.9388	1	1	0	ICI+chemotherapy	Tislelizumab	PD-1	1	0	1	0	0	0	1	0	1	0	0	0	0	0	0	0	0	1	0	0	550	97	15.47	0.79	1.24	0.0801551	13.28	0.858436	443.548	10.7097
60012088659	b8626c6164f963f356afe1aed22083c6	SCC	0	0	no	83.5714	0	no	male	60	54	165	19.8347	1	1	0	ICI+chemotherapy	Tislelizumab	PD-1	1	0	1	0	0	0	0	1	1	0	0	0	0	0	0	0	0	0	0	0	218	101	6.97	0.9	1.69	0.242468	4	0.573888	128.994	2.36686
60012089095	425b5dbc9f4a12eea342f7896e60bc7e	SCC	0	0	no	73.2857	0	no	male	73	79	173	26.496	1	1	0	ICI	Sintilimab	PD-1	0	0	0	0	0	0	0	0	0	0	0	0	0	0	0	0	0	0	0	0	194	106	6.73	0.86	1.72	0.255572	3.96	0.58841	112.791	2.30233
60012089243	8c71e24286dcdca5ab450141096b8a2e	adenocarcinoma	1	1	Myocarditis	44	0	no	female	68	54	169	18.9069	0	0	0	ICI+antiangiogenic_therapy	Tislelizumab	PD-1	0	0	0	0	0	0	0	0	0	0	0	0	0	1	0	1	0	0	0	0	58	62	5.04	0.61	0.67	0.132937	3.25	0.644841	86.5672	4.85075
60012090067	ec41e08d0d1580e4ed9fabf5fac2022a	adenocarcinoma	0	0	no	91.5714	0	no	male	69	60	163	22.5827	1	1	0	ICI+chemotherapy+antiangiogenic_therapy	Sintilimab	PD-1	1	1	0	0	0	0	0	0	1	0	0	0	0	1	1	0	0	0	0	0	267	116	6.78	0.5	1.27	0.187316	4.92	0.725664	210.236	3.87402
60012090194	6a04d982a37bcbb8f46dab9cdd46ec80	adenocarcinoma	0	0	no	74.5714	0	no	male	73	69	168	24.4473	1	1	0	ICI+chemotherapy	Pembrolizumab	PD-1	1	1	0	0	0	0	0	0	0	0	0	0	0	0	0	0	0	0	0	0	205	116	7.6	0.79	1.37	0.180263	5.22	0.686842	149.635	3.81022
60012098313	3f7a3411c0ee5ba8bf799261865f8aca	SCLC	0	0	no	94.2857	0	no	male	59	72	174	23.7812	1	0	0	ICI+chemotherapy	Durvalumab	PD-L1	1	0	0	0	1	0	1	0	0	0	0	0	0	0	0	0	0	0	1	0	182	153	5.17	0.46	1.79	0.346228	2.71	0.524178	101.676	1.51397
60012103822	ef1359ecb3ebb126e3e2d0f74e172f2d	SCLC	0	0	no	52.7143	0	no	male	60	62	173	20.7157	1	0	0	ICI+chemotherapy	Durvalumab	PD-L1	1	0	0	0	0	1	1	0	0	0	0	0	0	0	0	0	0	0	0	0	246	123	7.83	0.41	1.03	0.131545	6.34	0.809706	238.835	6.15534
60012112481	d4b84d9171a4170e8e409a602f984e25	SCLC	0	0	no	89.4286	0	no	male	60	65	172	21.9713	1	0	0	ICI+chemotherapy+antiangiogenic_therapy	Pembrolizumab	PD-1	1	0	1	0	0	0	0	0	0	0	0	0	0	1	0	1	0	1	0	0	21	100	5.13	0.3	1.17	0.22807	3.27	0.637427	17.9487	2.79487
60012116514	1de44870d5ea2163603c2ddb46c634ae	adenocarcinoma	0	0	no	87.8571	0	no	female	62	58	163	21.83	0	0	0	ICI+chemotherapy	Camilizumab	PD-1	1	1	0	0	0	0	1	0	0	0	0	0	0	0	0	0	0	0	0	0	284	126	3.43	0.19	0.96	0.279883	2.2	0.641399	295.833	2.29167
60012119883	f4d9354e6d69f9ca719707c8b3534443	adenocarcinoma	0	0	no	36.7143	0	no	male	73	54	165	19.8347	1	0	0	ICI+chemotherapy	Tislelizumab	PD-1	1	0	1	0	0	0	0	0	1	0	0	0	0	0	0	0	0	0	1	1	322	127	5.81	0.45	1.16	0.199656	3.97	0.683305	277.586	3.42241
60012123320	60cefe460e624f83257243a9e4d1e903	adenocarcinoma	0	0	no	93.2857	0	no	male	65	53	155	22.0604	1	0	0	ICI+chemotherapy	Pembrolizumab	PD-1	1	0	1	0	0	0	0	1	0	0	0	0	0	0	0	0	0	0	0	0	231	139	6.2	0.42	2.15	0.346774	3.49	0.562903	107.442	1.62326
60012126440	85be75b12057e65d49cc650fffd9b94e	adenocarcinoma	0	0	no	91.5714	0	no	female	49	51	157	20.6905	0	0	0	ICI+chemotherapy+antiangiogenic_therapy	Tislelizumab	PD-1	1	0	0	1	0	0	0	0	0	0	0	0	0	1	0	0	1	0	0	0	158	133	6.5	0.44	1.36	0.209231	4.57	0.703077	116.176	3.36029
60012127394	b86f799c52108f4308cf62d4771f0841	adenocarcinoma	0	0	no	76	0	no	male	64	65	174	21.4692	1	0	0	ICI+chemotherapy	Tislelizumab	PD-1	1	1	0	0	0	0	0	1	0	0	0	0	0	0	0	0	0	0	0	0	364	113	6.97	0.72	0.87	0.124821	5.24	0.751793	418.391	6.02299
60012127910	ac01caba638c77b141d10395c9a4e452	SCC	0	0	no	87	0	no	male	55	88	177	28.089	0	1	0	ICI+chemotherapy	Tislelizumab	PD-1	1	0	1	0	0	0	0	0	1	0	0	0	0	0	0	0	0	0	0	0	255	130	5.77	0.38	1.6	0.277296	3.65	0.632582	159.375	2.28125
60012134200	a00e64ce953e1eda7ff57cf1da92e60b	adenocarcinoma	0	0	no	92.7143	0	no	female	66	58	160	22.4609	0	0	0	ICI+chemotherapy	Tislelizumab	PD-1	1	1	0	0	0	0	0	1	0	0	0	0	0	0	0	0	0	0	0	0	254	90	9.8	1.26	0.95	0.0969388	7.53	0.768367	267.368	7.92632
60012137378	9dc9d5ad099b883d8900df879e18be6e	SCLC	0	0	no	34.8571	0	no	male	75	80	175	26.1224	1	0	0	ICI+chemotherapy	Durvalumab	PD-L1	1	0	0	0	1	0	1	0	0	0	0	0	0	0	0	0	0	0	1	1	153	141	6.38	0.41	0.91	0.142633	4.79	0.750784	168.132	5.26374
60012159606	72a1e73990413b2a2b29f9df9481625d	SCC	0	0	no	88.8571	0	no	male	58	77	165	28.2828	1	0	0	ICI+chemotherapy	Tislelizumab	PD-1	1	0	1	0	0	0	0	0	1	0	0	0	0	0	0	0	0	0	1	0	236	114	3.89	0.21	0.64	0.164524	2.96	0.760925	368.75	4.625
60012167538	04a6c58fd6e0b7ee6747f4f3f9ae6823	adenocarcinoma	1	1	Arrhythmia	6	1	First-Degree Atrioventricular Block (First-Degree AV Block)	male	77	52	157	21.0962	0	0	0	ICI+chemotherapy+antiangiogenic_therapy	Sintilimab	PD-1	1	1	0	0	0	0	1	0	0	0	0	0	0	1	1	0	0	0	0	0	724	121	10.398	0.72	1.27	0.122139	8.24	0.79246	570.079	6.48819
60012167783	edfc21d237a6af10a3d08e472a4b82ec	SCC	1	1	Myocarditis	6	0	no	male	56	53	167	19.0039	1	0	0	ICI+chemotherapy	Pembrolizumab	PD-1	1	0	0	0	0	0	1	0	0	0	0	0	0	0	0	0	0	0	0	0	252	130	19.55	2.23	2.92	0.149361	14.04	0.718159	86.3014	4.80822
60012171426	68fab86bb28ff2ffba4e37f9fcff5c6f	SCC	0	0	no	86.2857	0	no	male	75	53	163	20.0233	1	1	0	ICI+chemotherapy	Tislelizumab	PD-1	1	0	1	0	0	0	0	0	1	0	0	0	0	0	0	0	0	0	0	0	218	106	8.93	0.96	1.12	0.12542	6.3	0.705487	194.643	5.625
60012175829	76697f0eb04c1e1e8ba5b1eb2204ceeb	SCC	0	0	no	76.2857	0	no	male	64	60	165	22.0386	0	0	0	ICI+chemotherapy	Tislelizumab	PD-1	1	0	1	0	0	0	0	0	1	0	0	0	0	0	0	0	0	0	0	0	300	79	9.29	1.33	1.78	0.191604	6	0.645856	168.539	3.37079
60012179600	0131fde21272f5afc3434c5933a7138b	adenocarcinoma	0	0	no	87.5714	0	no	male	68	74	178	23.3556	1	1	1	ICI+chemotherapy	Pembrolizumab	PD-1	1	1	0	0	0	0	1	0	0	0	0	0	0	0	0	0	0	1	1	0	229	149	7.86	0.45	1.52	0.193384	5.58	0.709924	150.658	3.67105
60012181240	065a8235730f3916d1c272dd2479956f	SCC	0	0	no	83.2857	0	no	male	68	68	168	24.093	1	1	0	ICI+chemotherapy	Sintilimab	PD-1	1	0	1	0	0	0	0	0	1	0	0	0	0	0	0	0	0	0	0	0	205	141	5.15	0.66	1.64	0.318447	2.71	0.526214	125	1.65244
60012182071	9e8699d7483f7f5a5bc58a9868e68c23	SCLC	0	0	no	51.8571	0	no	male	78	77	166	27.9431	1	0	0	ICI+chemotherapy	Durvalumab	PD-L1	1	0	0	0	0	1	0	0	0	0	0	0	0	0	0	0	0	0	0	0	204	146	4.7	0.46	1.67	0.355319	2.39	0.508511	122.156	1.43114
60012185963	11aa06a204bfd3b671920a4d56ac6da3	NET	0	0	no	86	0	no	male	60	69	171	23.426	1	0	0	ICI+chemotherapy+antiangiogenic_therapy	Sintilimab	PD-1	1	1	0	0	0	0	0	1	1	0	0	0	0	1	1	0	0	0	0	0	284	118	9.94	1.22	2.65	0.2666	5.55	0.55835	107.17	2.09434
60012190381	240da3bd12745d15cb66f029ce726cc7	SCC	0	0	no	81	0	no	male	68	76	185	22.206	1	1	0	ICI+chemotherapy	Tislelizumab	PD-1	1	0	1	0	0	0	0	1	0	0	0	0	0	0	0	0	0	0	0	0	213	132	5.58	0.58	1.35	0.241935	3.55	0.636201	157.778	2.62963
60012191423	ccb5a1a59082f37aa3256ec698416820	SCC	0	0	no	90.8571	0	no	male	68	55	167	19.721	1	1	0	ICI+chemotherapy	Atezolizumab	PD-L1	1	0	0	0	1	0	0	1	0	0	0	0	0	0	0	0	0	0	0	0	281	105	7.46	0.05	0.81	0.108579	6.52	0.873995	346.914	8.04938
60012206739	e018c47aea747047782c94e94f7ad9e5	SCC	0	0	no	86.2857	0	no	male	71	74	175	24.1633	1	1	0	ICI+chemotherapy	Pembrolizumab	PD-1	1	0	1	0	0	0	0	0	0	0	0	0	0	0	0	0	0	0	0	0	173	114	5.5	0.4	1.31	0.238182	3.53	0.641818	132.061	2.69466
60012206827	10ffcab3c4eb3f3705569ead84ab6a87	SCLC	0	0	no	86.4286	0	no	male	46	90	170	31.1419	1	1	0	ICI+chemotherapy	Atezolizumab	PD-L1	1	0	0	0	1	0	0	1	0	0	0	0	0	0	0	0	0	0	1	0	345	141	8.24	0.58	2.42	0.293689	5.11	0.620146	142.562	2.11157
60012210479	66d8a32b9aa478b95b54a6506e0b323c	adenocarcinoma	0	0	no	87.7143	0	no	female	61	55	155	23.0593	0	0	0	ICI+chemotherapy	Tislelizumab	PD-1	1	1	0	0	0	0	1	0	0	0	0	0	0	0	0	0	0	0	0	0	343	125	9.53	0.71	1.92	0.201469	6.53	0.685205	178.646	3.40104
60012210610	1d39f45f8d25ec45fac3ad2e8e20964c	adenocarcinoma	0	0	no	86.1429	0	no	female	61	64	155	26.6389	0	0	0	ICI+chemotherapy	Tislelizumab	PD-1	1	1	0	0	0	0	0	1	0	0	0	0	0	0	0	0	0	0	0	0	299	127	3.94	0.18	1.04	0.263959	2.59	0.65736	287.5	2.49038
60012220019	de5a35a4a8dcdecf1c166e8952f66507	SCC	0	0	no	78.1429	0	no	male	64	60	165	22.0386	1	1	0	ICI+chemotherapy	Sintilimab	PD-1	1	0	0	1	0	0	0	1	0	0	0	0	0	0	0	0	0	0	0	1	165	118	4.35	0.42	1.17	0.268966	2.69	0.618391	141.026	2.29915
60012223592	4eb8fb12d1ba473d30aa464da5a417b4	adenocarcinoma	0	0	no	89.5714	0	no	female	59	70	176	22.5981	0	0	0	ICI+chemotherapy	Pembrolizumab	PD-1	1	0	1	0	0	0	0	0	1	0	0	0	0	0	0	0	0	0	0	0	207	150	6.11	0.25	2.58	0.422259	3.17	0.518822	80.2326	1.22868
60012229868	9288f1e256b418e466c9e2d5cdb9633a	SCLC	0	0	no	81.5714	0	no	male	57	65	164	24.1672	0	0	0	ICI+chemotherapy	Atezolizumab	PD-L1	1	0	0	0	1	0	0	1	0	0	0	0	0	0	0	0	0	0	0	0	198	147	8.63	0.59	2.57	0.297798	5.08	0.588644	77.0428	1.97665
60012240841	4d61715c99d1d5403379012fc337b4d2	adenocarcinoma	0	0	no	86.1429	0	no	female	62	59	169	20.6575	0	0	0	ICI+chemotherapy	Pembrolizumab	PD-1	1	1	0	0	0	0	1	0	0	0	0	0	0	0	0	0	0	0	0	0	256	122	4.48	0.4	1.06	0.236607	2.97	0.662946	241.509	2.80189
60012244988	cc93fd19061a8f5e47e7e98d35bfe0bf	adenocarcinoma	0	0	no	86.7143	0	no	female	51	55	160	21.4844	0	0	0	ICI+chemotherapy	Pembrolizumab	PD-1	1	1	0	0	0	0	0	1	0	0	0	0	0	0	0	0	0	0	0	0	222	113	3.95	0.33	1.7	0.43038	1.86	0.470886	130.588	1.09412
60012257377	296253cba9e64049f051acb2cfb57bd8	SCLC	0	0	no	89.1429	0	no	male	63	46	160	17.9688	1	0	0	ICI+chemotherapy	Durvalumab	PD-L1	1	0	0	0	1	1	1	0	0	0	0	0	0	0	0	0	0	0	0	0	322	130	6.52	0.56	0.78	0.119632	4.66	0.714724	412.821	5.97436
60012262324	6a80a68fbac236a57192a621d9b912b4	adenocarcinoma	0	0	no	81.8571	0	no	male	56	74	165	27.1809	0	0	0	ICI+chemotherapy+antiangiogenic_therapy	Pembrolizumab	PD-1	1	1	0	0	0	0	0	1	0	0	0	0	0	1	0	0	1	0	0	0	190	169	7.08	0.4	1.76	0.248588	4.68	0.661017	107.955	2.65909
60012272360	746d3951c76e2cea9fc216e256ce9869	SCLC	0	0	no	89.2857	0	no	male	69	75	162	28.578	1	0	1	ICI+chemotherapy	Atezolizumab	PD-L1	1	0	0	0	1	0	1	1	0	0	0	0	0	0	0	0	0	0	0	0	220	126	6.07	0.5	1.44	0.237232	3.95	0.650741	152.778	2.74306
60012272793	71d4c5aff468dae8682c331174af62f3	adenocarcinoma	0	0	no	87.1429	0	no	male	65	53	164	19.7055	1	0	0	ICI+chemotherapy+antiangiogenic_therapy	Tislelizumab	PD-1	1	1	0	0	0	0	0	1	0	0	0	0	0	1	1	0	0	0	0	0	617	131	9.06	0.64	1.29	0.142384	6.7	0.739514	478.295	5.1938
60012286291	3b53663bd96bcca438e826ace80e8680	SCC	0	0	no	82.1429	0	no	male	68	51	173	17.0403	1	1	0	ICI+chemotherapy	Sintilimab	PD-1	1	1	0	0	0	0	0	0	1	0	0	0	0	0	0	0	0	0	1	0	299	119	6.25	0.46	1.5	0.24	4.09	0.6544	199.333	2.72667
60012286967	f1b9a51d2b61ee431dcba27e24bae3ee	NET	0	0	no	89	0	no	male	66	60	167	21.5139	0	0	0	ICI+chemotherapy	Durvalumab	PD-L1	1	0	0	0	1	0	0	1	0	0	0	0	0	0	0	0	0	0	0	0	167	142	7.38	0.84	1.23	0.166667	5.06	0.685637	135.772	4.11382
60012288028	ca1403dfbd49ccae8c8f4e4d67203c1c	adenocarcinoma	0	0	no	56.1429	0	no	female	51	68	166	24.677	0	0	0	ICI+chemotherapy+antiangiogenic_therapy	Tislelizumab	PD-1	1	1	0	0	0	0	0	1	0	0	0	0	0	1	1	0	0	0	0	0	264	130	9.13	0.51	0.91	0.0996714	7.65	0.837897	290.11	8.40659
60012288071	dd23f458d380bc4c1eb22b38d4204915	SCLC	0	0	no	78	0	no	male	66	54	158	21.531	0	0	0	ICI+chemotherapy	Atezolizumab	PD-L1	1	0	0	0	1	0	0	1	0	0	0	0	0	0	0	0	0	0	0	0	237	133	5.34	0.53	1.52	0.284644	3.18	0.595506	155.921	2.09211
60012292876	e9940d148ef8c9883189949129266c61	adenocarcinoma	0	0	no	73.5714	0	no	female	73	38	148	17.3484	1	0	0	ICI+chemotherapy	Tislelizumab	PD-1	1	1	0	0	0	0	0	0	1	0	0	0	0	0	0	0	0	0	0	0	343	110	6.94	0.98	2.42	0.348703	3.4	0.489914	141.736	1.40496
60012294591	f50efac2cb479746bc4d086b3e758af6	SCLC	0	0	no	87.5714	0	no	male	72	60	170	20.7612	1	1	0	ICI+chemotherapy	Durvalumab	PD-L1	1	0	0	0	1	0	0	1	0	0	0	0	0	0	0	0	0	0	0	0	213	121	7.84	1.05	1.5	0.191327	5.12	0.653061	142	3.41333
60012295739	e7bda0f55de8df72d5aaac13b1040b19	SCC	0	0	no	88.5714	0	no	male	68	57	170	19.7232	1	0	0	ICI+chemotherapy	Pembrolizumab	PD-1	1	0	1	0	0	0	0	0	1	0	0	0	0	0	0	0	0	0	1	0	277	127	13.27	0.95	1.41	0.106255	10.55	0.795026	196.454	7.48227
60012295899	fabff8308502e2362f8e68aa6d341a67	SCC	0	0	no	77	0	no	male	75	73	176	23.5666	1	0	0	ICI+chemotherapy	Durvalumab	PD-L1	1	0	0	0	1	0	0	0	1	0	0	0	0	0	0	0	0	0	1	0	241	149	6.63	0.49	1.25	0.188537	4.76	0.717949	192.8	3.808
60012297443	db0d1a95ef0578b2c5cb2c0ca944d853	adenocarcinoma	0	0	no	84.1429	0	no	male	61	68	172	22.9854	1	0	0	ICI+chemotherapy	Tislelizumab	PD-1	1	1	0	0	0	0	0	0	1	0	0	0	0	0	0	0	0	0	0	0	205	149	5.56	0.33	1.29	0.232014	3.83	0.688849	158.915	2.96899
60012302091	bfc479af4cfeb04d574f5ecf5fd3fd10	adenocarcinoma	0	0	no	34.7143	0	no	male	68	59	161	22.7615	1	1	0	ICI+antiangiogenic_therapy	Tislelizumab	PD-1	0	0	0	0	0	0	0	0	0	0	0	0	0	1	1	0	0	0	0	0	257	98	8.25	0.71	1.53	0.185455	5.65	0.684848	167.974	3.69281
60012305946	583f89e621b28872f9fe3649b95b4418	SCC	0	0	no	77.8571	0	no	male	64	55	162	20.9572	0	0	0	ICI+chemotherapy	Tislelizumab	PD-1	1	0	1	0	0	0	0	0	1	0	0	0	0	0	0	0	0	1	1	0	289	122	7.91	0.78	0.44	0.0556258	6.57	0.830594	656.818	14.9318
60012318455	1152f30ddc24d98040c83f9fe355cded	SCC	0	0	no	78	0	no	male	62	67	175	21.8776	1	0	0	ICI+chemotherapy	Tislelizumab	PD-1	1	1	0	0	0	0	0	1	0	0	0	0	0	0	0	0	0	0	0	0	279	124	5.88	0.57	1.52	0.258503	3.62	0.615646	183.553	2.38158
60012322026	8530d61fb6a8e8db349100d3c1117b20	SCC	0	0	no	87.8571	0	no	male	66	50	163	18.8189	0	0	0	ICI+chemotherapy	Durvalumab	PD-L1	1	0	0	1	0	0	0	1	0	0	0	0	0	0	0	0	0	0	0	0	91	133	7.13	0.47	1.33	0.186536	5	0.701262	68.4211	3.7594
60012323488	bf912544ecef576e4a3b93ebbe2c585c	SCC	0	0	no	87.7143	0	no	male	79	44	171	15.0474	1	0	0	ICI	Tislelizumab	PD-1	0	0	0	0	0	0	0	0	0	0	0	0	0	0	0	0	0	0	0	0	390	88	12.07	0.93	0.89	0.0737365	9.97	0.826015	438.202	11.2022
60012324783	90d1f8e1f35524d639aca0dd14aed666	adenocarcinoma	0	0	no	84	0	no	male	58	71	170	24.5675	1	1	0	ICI+chemotherapy	Pembrolizumab	PD-1	1	1	0	0	0	0	0	1	0	0	0	0	0	0	0	0	0	0	0	0	263	146	9.42	0.55	2.58	0.273885	6.07	0.644374	101.938	2.35271
60012326879	faf523663209fb12a28cda9d77e17104	SCC	0	0	no	65.4286	0	no	male	72	68	170	23.5294	1	0	1	ICI+chemotherapy	Durvalumab	PD-L1	1	0	0	0	1	0	1	0	1	0	0	0	0	0	0	0	0	1	1	0	201	159	5.55	0.37	1.63	0.293694	3.37	0.607207	123.313	2.06748
60012329728	b50408960588915ff6bb8768c4088696	adenocarcinoma	0	0	no	76.4286	0	no	male	65	58	164	21.5645	1	0	1	ICI+chemotherapy	Sintilimab	PD-1	1	1	0	0	0	0	0	0	1	0	0	0	0	0	0	0	0	0	0	0	267	148	8.64	0.62	0.96	0.111111	5.77	0.667824	278.125	6.01042
60012336850	8c48fc15e77be91f0052cf618751ed5e	LCC	0	0	no	83.1429	0	no	male	69	52	171	17.7832	1	0	0	ICI+chemotherapy	Tislelizumab	PD-1	1	0	1	0	0	0	0	0	1	0	0	0	0	0	0	0	0	1	0	0	287	133	8.94	0.54	2.18	0.243848	5.9	0.659955	131.651	2.70642
60012337921	6a2ee62becf32f09d530a52869db2bb9	LCC	0	0	no	84.8571	0	no	female	35	48	155	19.9792	0	0	0	ICI+chemotherapy+antiangiogenic_therapy	Pembrolizumab	PD-1	1	1	0	0	0	0	1	0	1	0	0	0	0	1	1	0	0	0	0	0	275	128	8.98	0.54	1.8	0.200445	6.42	0.714922	152.778	3.56667
60012345163	cb327a00443f0fc3d6e3c923d4a1adcd	SCLC	0	0	no	76.7143	0	no	male	75	62	159	24.5243	1	0	0	ICI+chemotherapy+antiangiogenic_therapy	Durvalumab	PD-L1	1	0	1	0	0	1	1	0	0	0	0	0	0	1	0	1	1	0	1	0	291	122	10.79	1.02	0.92	0.0852641	8.77	0.81279	316.304	9.53261
60012345935	36b320098372181ce5ff725bd59c2416	SCC	0	0	no	31.4286	0	no	female	63	50	155	20.8117	0	0	0	ICI	Durvalumab	PD-L1	0	0	0	0	0	0	0	0	0	0	0	0	0	0	0	0	0	0	0	0	73	46	5.18	0.33	0.83	0.160232	3.92	0.756757	87.9518	4.72289
60012347597	e2ca5008658d1180c361336cdd0be94b	SCC	0	0	no	82.8571	0	no	male	62	55	159	21.7555	1	1	0	ICI+chemotherapy+antiangiogenic_therapy	Pembrolizumab	PD-1	1	1	1	1	0	0	0	0	1	0	0	0	0	1	1	0	0	0	0	0	557	114	6.48	0.61	1.18	0.182099	4.63	0.714506	472.034	3.92373
60012349135	b213971ef22deb93e9378d7c9696161c	adenocarcinoma	0	0	no	83.2857	0	no	male	62	64	166	23.2254	1	0	0	ICI+chemotherapy	Tislelizumab	PD-1	1	0	0	1	0	0	0	1	0	0	0	0	0	0	0	0	0	0	0	0	304	121	5.67	0.32	1.45	0.255732	3.64	0.641975	209.655	2.51034
60012350943	4409a7b31f1cc58c76e77a1b2602d8ec	adenocarcinoma	1	1	Arrhythmia	4	1	Ventricular Premature Beat (VPB)	male	81	49	170	16.955	1	0	0	ICI+chemotherapy	Durvalumab	PD-L1	1	0	0	0	1	0	0	0	0	0	0	0	0	0	0	0	0	0	0	0	189	117	5.38	0.57	0.71	0.13197	4.04	0.750929	266.197	5.69014
60012353374	8b52df074e487bc6afe08e65a6fce537	SCC	0	0	no	69.8571	0	no	male	51	74	171	25.3069	1	1	0	ICI+chemotherapy	Tislelizumab	PD-1	1	0	1	0	0	0	0	0	1	0	0	0	0	0	0	0	0	0	0	0	292	96	8.05	0.73	1.27	0.157764	5.86	0.72795	229.921	4.61417
60012355856	89455ca6391bfffe9813f9724e1ec85f	adenocarcinoma	0	0	no	82.4286	0	no	male	63	48	164	17.8465	0	0	0	ICI+chemotherapy	Tislelizumab	PD-1	1	0	1	0	0	0	0	0	1	0	0	0	0	0	0	0	0	0	0	0	314	102	4.91	0.23	1.64	0.334012	3.01	0.613035	191.463	1.83537
60012361280	ab91c9a781715624a5ce14bd6f85c87a	adenocarcinoma	0	0	no	72.5714	0	no	male	60	71	169	24.8591	1	1	0	ICI+chemotherapy	Tislelizumab	PD-1	1	1	0	0	0	0	1	0	0	0	0	0	0	0	0	0	0	0	0	0	255	117	8.62	1.22	2.41	0.279582	4.32	0.50116	105.809	1.79253
60012364965	815645a992ffddc635614e0879dbdebf	SCC	1	1	Myocarditis	6	0	no	male	60	89	177	28.4082	1	1	0	ICI+chemotherapy	Tislelizumab	PD-1	1	0	1	1	0	0	1	1	0	0	0	0	0	0	0	0	0	0	0	0	200	136	6.1	0.65	1.18	0.193443	4.03	0.660656	169.492	3.41525
60012366903	35a3ed837eface197bfd588ae76265cf	SCC	0	0	no	71.8571	0	no	male	66	60	167	21.5139	1	1	0	ICI+chemotherapy	Tislelizumab	PD-1	1	0	1	0	0	0	1	0	0	0	0	0	0	0	0	0	0	0	1	0	362	123	9.52	0.61	1.84	0.193277	6.94	0.728992	196.739	3.77174
60012375285	c0d4f88c6b125e1f7fcd06b71e12ad45	SCC	0	0	no	70.5714	0	no	male	63	87	178	27.4587	1	0	0	ICI	Sintilimab	PD-1	0	0	0	0	0	0	0	0	0	0	0	0	0	0	0	0	0	1	0	0	305	134	10.01	0.73	1.69	0.168831	7.38	0.737263	180.473	4.36686
60012385132	b41ef64e831b4300f2cf7f2fd30ea9e9	SCC	0	0	no	85.2857	0	no	female	59	50	155	20.8117	0	0	0	ICI+chemotherapy	Tislelizumab	PD-1	1	1	0	0	0	0	0	1	0	0	0	0	0	0	0	0	0	0	0	0	147	123	3.1	0.21	1.26	0.406452	1.55	0.5	116.667	1.23016
60012389642	04320a1a3a0a13de4e391b33e3e307ec	SCC	0	0	no	69.8571	0	no	male	63	78	175	25.4694	1	1	0	ICI+chemotherapy	Pembrolizumab	PD-1	1	0	1	0	0	0	0	1	0	0	0	0	0	0	0	0	0	0	1	0	230	148	7.34	0.63	2.18	0.297003	4.13	0.56267	105.505	1.8945
60012393714	fcdf0e0fea1f8b95e3d0bcda84902e50	adenocarcinoma	0	0	no	82.5714	0	no	male	56	54	170	18.5467	1	1	0	ICI+chemotherapy	Tislelizumab	PD-1	1	1	0	0	0	0	1	1	0	0	0	0	0	0	0	0	0	0	0	0	391	129	8.69	0.63	2.38	0.273878	5.38	0.619102	164.286	2.2605
60012396702	b55c658891bb13c22f08c905cb8211b8	SCLC	0	0	no	85.8571	0	no	male	63	77	172	26.0276	1	0	0	ICI+chemotherapy	Durvalumab	PD-L1	1	0	0	0	1	0	1	0	0	0	0	0	0	0	0	0	0	0	1	0	312	139	8.11	0.52	2.15	0.265105	5.3	0.653514	145.116	2.46512
60012400185	b5e377a143716ea8ee8a3a77c6561b11	SCLC	0	0	no	84	0	no	male	51	84	171	28.7268	1	1	0	ICI+chemotherapy	Atezolizumab	PD-L1	1	0	0	0	1	0	0	1	0	0	0	0	0	0	0	0	0	0	0	0	188	159	5.91	0.48	1.52	0.257191	3.72	0.629442	123.684	2.44737
60012400684	da675fe5399b0306c051d6ab4385ee52	adenocarcinoma	0	0	no	84	0	no	male	75	57	158	22.8329	1	0	0	ICI+antiangiogenic_therapy	Pembrolizumab	PD-1	0	0	0	0	0	0	0	0	0	0	0	0	0	1	0	1	0	0	0	0	350	117	5.31	0.73	1.51	0.284369	2.66	0.500942	231.788	1.76159
60012406059	1f4cc9167d3545db726df125a5bf1553	SCC	0	0	no	84.5714	0	no	male	66	53	165	19.4674	0	0	0	ICI	Pembrolizumab	PD-1	0	0	0	0	0	0	0	0	0	0	0	0	0	0	0	0	0	0	0	0	207	118	11.5	1.51	1.93	0.167826	7.66	0.666087	107.254	3.96891
60012406180	199345d0231579299f687536cb5361ee	adenocarcinoma	0	0	no	78.8571	0	no	male	71	79	172	26.7036	1	1	0	ICI+chemotherapy	Tislelizumab	PD-1	1	1	0	0	0	0	0	0	1	0	0	0	0	0	0	0	0	0	0	0	156	125	6.15	0.45	1.33	0.21626	4.32	0.702439	117.293	3.24812
60012411155	a3fc724e79d45dfc622b65b54cd022fa	SCC	0	0	no	79	0	no	female	53	52	163	19.5717	0	0	1	ICI+chemotherapy+antiangiogenic_therapy	Tislelizumab	PD-1	1	0	1	0	0	0	1	0	0	0	0	0	0	1	0	1	0	0	0	0	165	98	4.01	0.68	1.37	0.341646	1.92	0.478803	120.438	1.40146
60012415129	3b79c02a05fb093da91f7e9b6a69ffcf	SCC	0	0	no	83.8571	0	no	male	67	59	159	23.3377	1	0	0	ICI+chemotherapy	Pembrolizumab	PD-1	1	0	1	0	0	0	0	1	0	0	0	0	0	0	0	0	0	0	0	0	329	138	8.03	0.54	2.46	0.306351	4.97	0.618929	133.74	2.02033
60012420220	b74bff2112c746da69935ef2f3e54024	adenocarcinoma	0	0	no	80.1429	0	no	male	73	74	165	27.1809	1	0	0	ICI+chemotherapy+antiangiogenic_therapy	Tislelizumab	PD-1	1	1	0	0	0	0	1	0	0	0	0	0	0	1	1	0	0	0	0	0	180	146	8.58	0.58	1.36	0.158508	6.5	0.757576	132.353	4.77941
60012433011	6f656bb93607af4623aedbabcf1ca266	adenocarcinoma	0	0	no	78.7143	0	no	male	71	72	175	23.5102	1	1	0	ICI+chemotherapy	Pembrolizumab	PD-1	1	0	1	0	0	0	0	0	1	0	0	0	0	0	0	0	0	0	0	0	327	106	8.99	0.55	1.41	0.156841	6.86	0.76307	231.915	4.86525
60012443629	950192eec6b4ea62bf6d968d255a95ef	adenocarcinoma	0	0	no	82.5714	0	no	male	66	73	171	24.9649	1	0	0	ICI+chemotherapy	Atezolizumab	PD-L1	1	0	0	0	1	0	1	0	1	0	0	0	0	0	0	0	0	0	0	0	187	145	5.9	0.34	2.33	0.394915	3.05	0.516949	80.2575	1.30901
60012446791	dd4905a1ed3fb5d9d670a900ee8a8131	adenocarcinoma	0	0	no	44.8571	0	no	male	56	59	175	19.2653	1	1	0	ICI+chemotherapy+antiangiogenic_therapy	Tislelizumab	PD-1	1	1	0	0	0	0	1	0	0	0	0	0	0	1	1	0	1	0	0	0	97	138	4.82	0.09	0.77	0.159751	3.85	0.798755	125.974	5
60012449461	933d1221a4c79c5529861f20dd947ffa	adenocarcinoma	1	1	Myocarditis	14	0	no	male	66	72	178	22.7244	1	0	0	ICI+chemotherapy	Pembrolizumab	PD-1	1	1	0	0	0	0	0	1	0	0	0	0	0	0	0	0	0	0	0	0	254	125	12.42	0.93	1.75	0.140902	9.65	0.776973	145.143	5.51429
60012461864	4086b6f7ac939644466c38c8f06e8751	adenocarcinoma	0	0	no	80.1429	0	no	male	57	64	178	20.0417	1	0	0	ICI+chemotherapy	Tislelizumab	PD-1	1	1	0	0	0	0	0	1	0	0	0	0	0	0	0	0	0	0	0	0	172	134	13.9	1.09	1.07	0.0769784	11.32	0.814388	160.748	10.5794
60012477743	266b0bf0f646349668f942c14a97d704	SCLC	0	0	no	83.8571	0	no	male	56	95	174	31.378	1	0	0	ICI+chemotherapy	Durvalumab	PD-L1	1	0	0	0	1	0	0	1	0	0	0	0	0	0	0	0	0	1	1	0	105	146	8.33	0.47	0.83	0.0996399	6.83	0.819928	126.506	8.22892
60012478980	84e93e39f49dc25d8a1bbb0b2c54cb5c	SCLC	0	0	no	82.8571	0	no	male	69	65	173	21.7181	1	1	0	ICI+chemotherapy+antiangiogenic_therapy	Durvalumab	PD-L1	1	0	0	0	1	0	0	1	0	0	0	0	0	1	0	0	1	0	0	0	164	127	4.32	0.37	1.98	0.458333	1.8	0.416667	82.8283	0.909091
60012484763	8c3cdc30ae09ca36f4d4344b92614155	adenocarcinoma	0	0	no	76.1429	0	no	male	50	75	178	23.6713	0	0	0	ICI+chemotherapy	Tislelizumab	PD-1	1	1	0	0	0	0	0	1	0	0	0	0	0	0	0	0	0	0	0	0	313	119	5.15	0.62	1.69	0.328155	2.77	0.537864	185.207	1.63905
60012487300	72f016e93195e6340cd5868242db14a6	adenocarcinoma	0	0	no	78.7143	0	no	male	60	61	170	21.1073	1	0	0	ICI+chemotherapy	Durvalumab	PD-L1	1	0	0	0	1	1	0	1	0	0	0	0	0	0	0	0	0	0	0	0	260	121	8.49	0.74	2.24	0.26384	5.32	0.62662	116.071	2.375
60012491188	a7c352a5e61fa6f2867e956e4686ee8d	SCC	0	0	no	82.7143	0	no	male	73	73	169	25.5593	1	1	0	ICI+chemotherapy	Nivolumab	PD-1	1	0	0	1	0	0	0	1	0	0	0	0	0	0	0	0	0	0	0	0	185	111	5.91	0.03	0.74	0.125212	5.12	0.866328	250	6.91892
60012513682	cf78bd92fd008117b769ee33cc668f91	SCC	0	0	no	78.7143	0	no	male	64	60	164	22.3081	1	0	0	ICI+chemotherapy+antiangiogenic_therapy	Tislelizumab	PD-1	1	0	0	0	0	0	0	1	0	0	0	0	0	1	0	1	0	0	0	0	232	126	8.06	0.74	1.7	0.210918	5.47	0.67866	136.471	3.21765
60012515011	893ed5df23237b28129eed94d2d6e0ae	SCC	0	0	no	81.4286	0	no	male	69	77	168	27.2817	1	0	0	ICI+chemotherapy	Tislelizumab	PD-1	1	0	1	0	0	0	0	0	1	0	0	0	0	0	0	0	0	0	0	0	172	164	10.25	0.89	2.19	0.213659	6.78	0.661463	78.5388	3.09589
60012516161	ec4a4000cea94eba0a20307d241f6f4c	SCC	0	0	no	73.4286	0	no	male	66	58	160	22.4609	1	0	0	ICI+chemotherapy	Tislelizumab	PD-1	1	0	0	0	1	1	0	1	0	0	0	0	0	0	0	0	0	0	0	0	155	115	6.2	0.57	0.97	0.156452	4.54	0.732258	159.794	4.68041
60012516873	c8b499104dba34cdb19c55a28b61b32c	SCC	0	0	no	77.2857	0	no	male	71	52	170	17.9931	1	0	0	ICI+chemotherapy	Tislelizumab	PD-1	1	0	1	0	0	0	0	1	1	0	0	0	0	0	0	0	0	0	0	0	466	97	7.38	0.95	0.86	0.116531	5.36	0.726287	541.86	6.23256
60012519124	d38e8bb9d36990ad3583d2a18158b431	SCLC	0	0	no	82.7143	0	no	male	60	67	169	23.4586	1	0	0	ICI+chemotherapy	Durvalumab	PD-L1	1	0	0	0	1	0	1	0	0	0	0	0	0	0	0	0	0	0	0	0	312	149	6.47	0.4	1.28	0.197836	4.44	0.686244	243.75	3.46875
60012521644	e65668c62e75fd8655c8a1cf6b11563d	SCC	0	0	no	32.2857	0	no	male	33	61	177	19.4708	0	0	0	ICI+chemotherapy+antiangiogenic_therapy	Sintilimab	PD-1	1	1	0	0	0	0	0	0	0	0	0	0	0	1	1	0	0	0	0	0	343	123	7.04	1.1	1.78	0.252841	3.91	0.555398	192.697	2.19663
60012533204	bf968e0c691999de5c25f1b070978540	SCC	0	0	no	82.7143	0	no	male	68	60	160	23.4375	1	1	0	ICI+chemotherapy	Pembrolizumab	PD-1	1	1	0	0	0	0	0	0	1	0	0	0	0	0	0	0	0	0	0	0	232	149	9.33	0.63	1.87	0.200429	6.44	0.690247	124.064	3.44385
60012549424	91f1cb52abfb54eb34c1d5abbd2c042f	SCC	0	0	no	52.7143	0	no	male	68	70	174	23.1206	1	1	0	ICI+chemotherapy	Durvalumab	PD-L1	1	0	1	0	0	0	0	0	1	0	0	0	0	0	0	0	0	0	0	0	244	135	7.55	0.76	0.88	0.116556	5.66	0.749669	277.273	6.43182
60012549630	421099de64c6fcaf9596bfef594b1a72	adenocarcinoma	0	0	no	82.4286	0	no	male	70	74	172	25.0135	1	0	0	ICI+chemotherapy	Durvalumab	PD-L1	1	0	0	0	0	1	0	0	0	0	0	0	0	0	0	0	0	0	0	0	163	96	4.87	0.39	1.01	0.207392	3.31	0.679671	161.386	3.27723
60012561684	606f6df6b4662f6d069bf0688358c103	adenocarcinoma	0	0	no	76.8571	0	no	male	59	66	175	21.551	1	1	0	ICI+chemotherapy	Nivolumab	PD-1	1	1	0	0	0	0	0	1	0	0	0	0	0	0	0	0	0	0	0	0	191	79	16.96	2.41	1.38	0.0813679	12.56	0.740566	138.406	9.10145
60012577393	071b8e40099758741ee7e2df8d79ab68	adenocarcinoma	0	0	no	54.5714	0	no	male	45	71	156	29.1749	1	0	0	ICI+chemotherapy	Tislelizumab	PD-1	1	0	0	0	0	0	1	1	0	0	0	0	0	0	0	0	0	0	0	0	361	134	6.87	0.72	1.55	0.225619	4.51	0.656477	232.903	2.90968
60012580301	ba1747b2b67ddf02d140d4067c77db2b	SCLC	0	0	no	78.5714	0	no	female	58	45	160	17.5781	0	0	0	ICI+chemotherapy	Tislelizumab	PD-1	1	0	1	0	0	0	0	0	1	0	0	0	0	0	0	0	0	0	0	0	241	110	3.28	0.24	0.85	0.259146	2.07	0.631098	283.529	2.43529
60012580523	4607b1e868ee1783cf5a31a9795e3410	SCC	0	0	no	72.7143	0	no	male	61	60	168	21.2585	1	0	0	ICI+chemotherapy	Tislelizumab	PD-1	1	0	1	0	0	0	1	0	0	0	0	0	0	0	0	0	0	0	0	0	233	119	6.9	0.95	1.62	0.234783	4.28	0.62029	143.827	2.64198
60012583826	3ca8e3e3236fbe7cd52566c8d109aea0	adenocarcinoma	0	0	no	77.4286	0	no	male	64	50	160	19.5312	1	1	0	ICI+chemotherapy	Tislelizumab	PD-1	1	1	0	0	0	0	0	1	0	0	0	0	0	0	0	0	0	0	0	0	483	112	10.42	0.81	2.44	0.234165	7.03	0.674664	197.951	2.88115
60012584373	6a219f6da47833fd94a965a239639ecb	SCC	0	0	no	81.4286	0	no	female	63	49	151	21.4903	0	0	0	ICI+chemotherapy	Tislelizumab	PD-1	1	0	1	0	0	0	0	0	1	0	0	0	0	0	0	0	0	0	0	0	412	114	8.52	1.06	2.77	0.325117	4.47	0.524648	148.736	1.61372
60012587684	00b9ac2f49a60a120e0fca5ec2f51323	SCC	0	0	no	76.4286	0	no	female	77	55	157	22.1104	0	0	0	ICI+chemotherapy+antiangiogenic_therapy	Pembrolizumab	PD-1	1	0	0	1	0	0	0	1	0	0	0	0	0	1	0	0	1	0	1	0	156	95	4.34	0.6	1.66	0.382488	1.77	0.407834	93.9759	1.06627
60012588151	3aaaf9a5b8bc2765cb67299b041ff22d	adenocarcinoma	0	0	no	81.5714	0	no	male	69	68	175	22.2041	1	1	1	ICI+chemotherapy	Durvalumab	PD-L1	1	0	0	0	1	0	1	0	0	0	0	0	0	0	0	0	0	0	0	0	221	125	12.93	1.25	1.4	0.108275	10.21	0.789637	157.857	7.29286
60012588302	cd61f6ce62d3bcb1c786714201af25ac	SCLC	0	0	no	81.2857	0	no	male	66	52	159	20.5688	1	0	0	ICI+chemotherapy	Durvalumab	PD-L1	1	0	0	0	1	0	1	0	0	0	0	0	0	0	0	0	0	1	1	0	254	137	7.7	0.5	2.49	0.323377	4.21	0.546753	102.008	1.69076
60012597392	9ec54622fe06cf518ec8945d117d0cd5	adenocarcinoma	0	0	no	75.8571	0	no	male	68	51	154	21.5045	1	0	0	ICI+chemotherapy	Tislelizumab	PD-1	1	0	0	0	1	0	0	1	0	0	0	0	0	0	0	0	0	0	0	0	147	112	10.97	0.79	0.9	0.0820419	9.06	0.825889	163.333	10.0667
60012600265	9c6a37838980ffd38526bbcf705b1b50	adenocarcinoma	0	0	no	80.5714	0	no	male	61	62	168	21.8963	0	0	0	ICI+chemotherapy	Durvalumab	PD-L1	1	0	0	0	1	0	0	1	0	0	0	0	0	0	0	0	0	1	0	0	225	148	7.7	0.49	1.86	0.241558	5.22	0.677922	120.968	2.80645
60012603172	3e7b9e2f4be07b0d06dfb9df2c3b2234	adenocarcinoma	0	0	no	77.8571	0	no	male	59	70	167	25.0995	1	0	0	ICI+chemotherapy	Durvalumab	PD-L1	1	0	0	0	1	0	0	1	0	0	0	0	0	0	0	0	0	0	0	0	225	134	10	1.16	1.51	0.151	7.26	0.726	149.007	4.80795
60012609363	ffbcdfd3b04ea233bf80011c08ba019c	adenocarcinoma	0	0	no	66.7143	0	no	male	56	90	178	28.4055	1	0	0	ICI+chemotherapy	Camilizumab	PD-1	1	1	0	0	0	0	0	0	1	0	0	0	0	0	0	0	0	0	1	0	409	157	12.81	0.92	2.38	0.185792	9.31	0.726776	171.849	3.91176
60012623443	dd988dd1bfd155df62d7fb638f4dadd2	SCC	0	0	no	75.4286	0	no	male	69	55	163	20.7008	1	0	0	ICI+chemotherapy	Sintilimab	PD-1	1	1	0	0	0	0	0	1	1	0	0	0	0	0	0	0	0	0	0	0	137	133	5.45	0.77	1.45	0.266055	3.15	0.577982	94.4828	2.17241
60012628235	2dd6484d621c516b3c92615292f499b3	SCC	0	0	no	72.1429	0	no	male	60	72	158	28.8415	0	0	0	ICI+chemotherapy	Pembrolizumab	PD-1	1	0	1	0	0	0	0	0	1	0	0	0	0	0	0	0	0	0	0	0	519	130	12.83	1.2	2.38	0.185503	9.19	0.71629	218.067	3.86134
60012634928	786f86a606e1075d78ee8741b71200c0	adenocarcinoma	1	1	Myocarditis	18	0	no	female	64	70	156	28.764	0	0	0	ICI+chemotherapy	Sintilimab	PD-1	1	1	0	0	0	0	0	1	0	0	0	0	0	0	0	0	0	0	0	0	412	92	7.76	0.64	1.42	0.18299	5.23	0.673969	290.141	3.6831
60012643420	2e4e933451b8cb025b6a2b92322649a3	adenocarcinoma	0	0	no	73.4286	0	no	male	53	73	170	25.2595	1	0	0	ICI+chemotherapy	Pembrolizumab	PD-1	1	1	0	0	0	0	1	0	0	0	0	0	0	0	0	0	0	0	0	0	305	115	5.2	0.8	1.15	0.221154	3.17	0.609615	265.217	2.75652
60012644817	80235df2918e2718de96071f3f0688fb	adenocarcinoma	0	0	no	72.2857	0	no	male	54	63	161	24.3046	0	0	0	ICI+chemotherapy	Tislelizumab	PD-1	1	0	0	0	0	0	1	0	1	0	0	0	0	0	0	0	0	0	0	0	247	112	10.26	0.92	1.56	0.152047	7.73	0.753411	158.333	4.95513
60012652377	1adf4a1edccb58898c79c6e3fd1f88ff	adenocarcinoma	0	0	no	79.5714	0	no	male	66	65	170	22.4913	1	0	0	ICI+chemotherapy+antiangiogenic_therapy	Sintilimab	PD-1	1	1	0	0	0	0	1	0	1	0	0	0	0	1	1	0	1	0	1	0	319	132	8.91	0.83	1.23	0.138047	6.62	0.742985	259.35	5.38211
60012652586	c3633894dfe0f7042dfceafff476de9a	adenocarcinoma	0	0	no	74.2857	0	no	male	62	70	177	22.3435	1	1	0	ICI+chemotherapy	Sintilimab	PD-1	1	1	0	0	0	0	0	1	0	0	0	0	0	0	0	0	0	0	0	1	197	107	16.07	1.03	1.54	0.0958307	13.47	0.838208	127.922	8.74675
60012656610	704523e852a356ef9743b04bbb257aed	adenocarcinoma	1	1	Myocarditis	38	0	no	female	57	60	165	22.0386	0	0	0	ICI+chemotherapy	Tislelizumab	PD-1	1	1	0	0	0	0	0	0	1	0	0	0	0	0	0	0	0	0	0	0	317	118	4.29	0.49	0.74	0.172494	3	0.699301	428.378	4.05405
60012666019	44884c5b9291084736b93c0ca84d86aa	adenocarcinoma	0	0	no	70.2857	0	no	male	61	71	169	24.684	0	0	0	ICI+chemotherapy	Tislelizumab	PD-1	1	0	1	0	0	0	0	1	0	0	0	0	0	0	0	0	0	0	0	0	165	134	4.03	0.41	0.87	0.215881	2.62	0.650124	189.655	3.01149
60012668560	67cd1b25a6c6a886bb3f0d9feffb9caf	SCC	0	0	no	78.8571	0	no	male	62	69	168	24.3056	1	0	0	ICI+chemotherapy+antiangiogenic_therapy	Tislelizumab	PD-1	1	1	0	0	0	0	1	0	0	0	0	0	0	1	0	0	1	1	1	0	312	148	10.92	0.14	0.83	0.0760073	9.7	0.888278	375.904	11.6867
60012669702	eb75b0b500a41765e68950bfe14d17a8	adenocarcinoma	0	0	no	74.8571	0	no	male	67	70	159	27.6888	1	0	0	ICI+chemotherapy	Tislelizumab	PD-1	1	1	0	0	0	0	0	1	0	0	0	0	0	0	0	0	0	0	0	0	165	135	12.67	0.87	1.43	0.112865	10.21	0.805841	115.385	7.13986
60012670281	e970915c7f9f560587b64f9b1085bb07	adenocarcinoma	0	0	no	75.8571	0	no	male	62	62	165	22.7732	1	1	0	ICI+chemotherapy	Tislelizumab	PD-1	1	1	0	0	0	0	0	0	1	0	0	0	0	0	0	0	0	0	0	0	435	145	9.98	0.57	2.9	0.290581	6.2	0.621242	150	2.13793
60012680092	c8e4ac3f8441ee88e69997dc3cb25cdc	SCC	0	0	no	79.1429	0	no	male	57	46	155	19.1467	1	0	0	ICI+chemotherapy	Tislelizumab	PD-1	1	0	1	0	0	0	0	0	1	0	0	0	0	0	0	0	0	0	0	0	557	118	11.59	0.64	2.52	0.217429	8.31	0.716997	221.032	3.29762
60012680521	af97e34a193ced4dc0051346d3ad1c53	SCLC	0	0	no	79.2857	0	no	male	70	73	162	27.8159	1	0	0	ICI+chemotherapy	Durvalumab	PD-L1	1	0	0	0	1	0	0	1	0	0	0	0	0	0	0	0	0	0	0	0	182	146	6.76	0.61	1.4	0.207101	4.35	0.643491	130	3.10714
60012690667	c7516efa0f147010ab530df74f7074ca	SCC	0	0	no	53.4286	0	no	male	62	75	176	24.2123	1	0	0	ICI+chemotherapy	Atezolizumab	PD-L1	1	0	1	0	0	0	0	0	0	0	0	0	0	0	0	0	0	0	0	0	158	123	5.33	0.91	2.04	0.382739	2.21	0.414634	77.451	1.08333
60012690870	ee4aef5c4d177461ccd8ab3b71302489	adenocarcinoma	0	0	no	75.4286	0	no	male	52	86	178	27.143	1	1	0	ICI+chemotherapy	Tislelizumab	PD-1	1	1	0	0	0	0	0	0	1	0	0	0	0	0	0	0	0	0	0	0	250	152	7.35	0.06	1.35	0.183673	5.94	0.808163	185.185	4.4
60012691698	352e2ae815ddf2c48e868d128ed5816f	SCLC	0	0	no	50.4286	0	no	female	59	54	158	21.6311	0	0	0	ICI+chemotherapy	Durvalumab	PD-L1	1	0	0	0	1	0	1	0	0	0	0	0	0	0	0	0	0	0	0	0	206	140	4.02	0.23	1.48	0.368159	2.23	0.554726	139.189	1.50676
60012693260	7dae49e6a053f48356b01d87dd83f88e	SCC	0	0	no	70.4286	0	no	male	58	68	175	22.2041	1	1	0	ICI+chemotherapy	Tislelizumab	PD-1	1	0	1	0	0	0	0	1	0	0	0	0	0	0	0	0	0	0	0	0	240	129	6.08	0.48	1.59	0.261513	3.87	0.636513	150.943	2.43396
60012703410	83a70c0a980e93801bd6a62940829792	SCC	0	0	no	75.8571	0	no	female	72	50	159	19.7777	0	0	0	ICI	Sintilimab	PD-1	0	0	0	0	0	0	0	0	0	0	0	0	0	0	0	0	0	0	0	0	335	79	13.36	0.92	1.17	0.0875749	11.16	0.835329	286.325	9.53846
60012710354	d6a1cb8f60bbe154ae93b4bdc0bcb7b2	SCLC	0	0	no	71.4286	0	no	male	60	62	174	20.4783	1	0	0	ICI+chemotherapy	Durvalumab	PD-L1	1	0	0	0	1	0	1	0	0	0	0	0	0	0	0	0	0	0	0	0	168	135	14.24	0.87	3.02	0.212079	10.23	0.718399	55.6291	3.38742
60012723275	85e96d3f4f75eacd76042e5deeda5149	adenocarcinoma	0	0	no	58.1429	0	no	female	75	40	143	19.5609	0	0	0	ICI+chemotherapy+antiangiogenic_therapy	Tislelizumab	PD-1	1	1	0	0	0	0	0	0	1	0	0	0	0	1	1	0	0	0	0	0	239	117	9	0.68	2	0.222222	6.27	0.696667	119.5	3.135
60012723705	03581bd1143dfba0ce3113900fb80b1d	SCLC	0	0	no	58.5714	0	no	male	60	60	161	23.1473	1	1	0	ICI+chemotherapy	Durvalumab	PD-L1	1	0	0	0	1	1	0	0	1	0	0	0	0	0	0	0	0	0	0	0	239	131	4.8	0.48	0.82	0.170833	3.35	0.697917	291.463	4.08537
60012725446	a3a973ce677e7cb72b9c7b15f286ff3d	adenocarcinoma	0	0	no	75	0	no	male	71	60	170	20.7612	1	0	0	ICI+chemotherapy	Tislelizumab	PD-1	1	1	0	0	0	0	0	1	0	0	0	0	0	0	0	0	0	1	1	0	216	133	6.12	0.62	2.26	0.369281	3.06	0.5	95.5752	1.35398
60012726584	dd539d4b10ae93387f17de3f80f363cd	adenocarcinoma	0	0	no	77.5714	0	no	male	74	65	177	20.7476	0	0	0	ICI+chemotherapy	Sintilimab	PD-1	1	1	0	0	0	0	0	1	0	0	0	0	0	0	0	0	0	0	0	0	255	137	5.83	0.53	1.3	0.222985	3.37	0.578045	196.154	2.59231
60012731109	6baf64ff268b066064708a143c94ff03	adenocarcinoma	0	0	no	70.1429	0	no	female	39	63	160	24.6094	0	0	0	ICI+chemotherapy	Pembrolizumab	PD-1	1	1	0	0	0	0	0	1	0	0	0	0	0	0	0	0	0	0	0	0	197	124	3.91	0.22	1.5	0.383632	1.98	0.506394	131.333	1.32
60012734496	a4947b078f8f68a2f9d3076b7dd7c36c	adenocarcinoma	0	0	no	74.2857	0	no	male	64	55	165	20.202	1	1	0	ICI+chemotherapy	Sintilimab	PD-1	1	1	0	0	0	0	0	1	0	0	0	0	0	0	0	0	0	0	0	0	124	121	5.2	0.08	0.87	0.167308	4.24	0.815385	142.529	4.87356
60012746586	a10e3d923b5460474ac5fd28ebf35272	NET	0	0	no	77.4286	0	no	male	61	56	174	18.3644	1	0	0	ICI+chemotherapy	Atezolizumab	PD-L1	1	0	0	0	1	1	1	1	0	0	0	0	0	0	0	0	0	0	0	0	471	159	5.95	0.24	1.86	0.312605	3.49	0.586555	253.226	1.87634
60012749221	751a81d1e33fb1797c915af2afe4f661	adenocarcinoma	0	0	no	73.4286	0	no	male	55	61	170	21.1073	1	1	0	ICI+chemotherapy	Tislelizumab	PD-1	1	1	0	0	0	0	0	1	0	0	0	0	0	0	0	0	0	0	0	0	362	121	9.2	0.64	1.68	0.182609	6.82	0.741304	215.476	4.05952
60012754848	fb237e10b8881ad708c655287770c57e	sarcomatoid carcinoma	0	0	no	77.4286	0	no	male	74	70	169	24.5089	1	1	0	ICI	Camilizumab	PD-1	0	0	0	0	0	0	0	0	0	0	0	0	0	0	0	0	0	1	0	1	246	129	8.92	0.95	1.35	0.151345	6.43	0.720852	182.222	4.76296
60012762061	eeb20463ed085b9b358122112660c63b	adenocarcinoma	0	0	no	72.5714	0	no	male	68	70	169	24.5089	1	0	0	ICI+chemotherapy	Camilizumab	PD-1	1	1	0	0	0	0	0	1	1	0	0	0	0	0	0	0	0	0	0	0	325	107	10.59	1.49	2.41	0.227573	6.61	0.624174	134.855	2.74274
60012770082	1f3e6d2536995f9c9d3bee47607a9c3d	SCC	0	0	no	72.5714	0	no	male	72	74	163	27.852	1	0	0	ICI+chemotherapy	Pembrolizumab	PD-1	1	1	0	0	0	0	0	0	1	0	0	0	0	0	0	0	0	0	0	0	201	129	7.15	0.45	1.5	0.20979	4.64	0.648951	134	3.09333
60012777437	9a4d5926af6dc8ecde36439b877c2e50	SCC	0	0	no	28	0	no	male	57	68	165	24.977	1	1	0	ICI+chemotherapy	Pembrolizumab	PD-1	1	1	0	0	0	0	0	0	0	0	0	0	0	0	0	0	0	0	0	0	131	123	6.27	0.43	1.56	0.248804	4.09	0.652313	83.9744	2.62179
60012779697	33913f556bd8b3c7654903ac3b24479a	SCLC	0	0	no	76.7143	0	no	female	57	46	158	18.4265	0	0	0	ICI+chemotherapy	Durvalumab	PD-L1	1	0	0	0	1	0	1	0	0	0	0	0	0	0	0	0	0	0	0	0	222	128	3.56	0.23	1.66	0.466292	1.63	0.457865	133.735	0.981928
60012786032	21eb3ac30b2b163c2829971948713559	SCC	0	0	no	73	0	no	male	74	63	160	24.6094	1	0	0	ICI+chemotherapy	Nivolumab	PD-1	1	0	1	0	0	0	1	0	0	0	0	0	0	0	0	0	0	0	0	0	256	137	5.09	0.57	1.46	0.286837	2.97	0.583497	175.342	2.03425
60012787615	63a8293a9f885ecf6dd899bdfabf3670	SCC	0	0	no	74.5714	0	no	male	61	65	162	24.7676	1	0	0	ICI+chemotherapy	Pembrolizumab	PD-1	1	0	1	0	0	0	0	0	1	0	0	0	0	0	0	0	0	0	0	0	211	106	7.08	0.45	1.02	0.144068	5.31	0.75	206.863	5.20588
60012792328	92a61061539b3931b55628196d2d4046	adenocarcinoma	0	0	no	72.8571	0	no	male	71	51	158	20.4294	1	0	0	ICI+chemotherapy	Tislelizumab	PD-1	1	0	1	0	0	0	0	1	1	0	0	0	0	0	0	0	0	0	0	0	196	120	7.54	0.53	1.54	0.204244	5.23	0.693634	127.273	3.3961
60012799873	56a727fd0279412ed0afbe1a8603ab62	SCC	0	0	no	76.1429	0	no	male	59	58	172	19.6052	0	0	0	ICI+chemotherapy+antiangiogenic_therapy	Durvalumab	PD-L1	1	0	0	0	1	0	0	1	0	0	0	0	0	1	0	0	1	0	0	0	228	148	5.1	0.37	1.1	0.215686	3.49	0.684314	207.273	3.17273
60012800556	db6c822d528449e3560df789f445891f	SCC	0	0	no	69.7143	0	no	male	65	55	174	18.1662	1	0	0	ICI+chemotherapy	Tislelizumab	PD-1	1	0	0	1	0	0	0	1	0	0	0	0	0	0	0	0	0	0	0	0	279	129	8.98	0.83	2.65	0.2951	4.65	0.517817	105.283	1.75472
60012806431	cdfacf07f1449ef29c76f0009a57bf60	adenocarcinoma	0	0	no	51.7143	0	no	female	74	52	152	22.5069	0	0	0	ICI+chemotherapy	Sintilimab	PD-1	1	1	0	0	0	0	1	0	0	0	0	0	0	0	0	0	0	0	0	0	269	111	8.13	0.6	1.17	0.143911	6.18	0.760148	229.915	5.28205
60012822799	a93063cbe7e70f8822ff5fb7633b812d	SCC	1	1	Arrhythmia	8	1	Atrial Premature Beat (APB)	male	77	72	175	23.5102	0	0	0	ICI+chemotherapy	Pembrolizumab	PD-1	1	0	1	0	0	0	0	0	0	0	0	0	0	0	0	0	0	0	0	0	278	149	7.42	0.47	1.65	0.222372	5.04	0.679245	168.485	3.05455
60012842095	ab350f0a63e0717dc0fd49bb9626fce3	SCC	0	0	no	71.2857	0	no	male	60	85	175	27.7551	1	1	0	ICI+chemotherapy	Tislelizumab	PD-1	1	0	1	0	0	0	0	0	1	0	0	0	0	0	0	0	0	0	0	0	291	151	8.5	0.6	2.65	0.311765	5.04	0.592941	109.811	1.90189
60012843495	cdec03dbdbc1f20e447231d66a3aec93	sarcomatoid carcinoma	0	0	no	66.2857	0	no	male	60	57	175	18.6122	1	1	0	ICI	Camilizumab	PD-1	0	0	0	0	0	0	0	0	0	0	0	0	0	0	0	0	0	0	0	0	663	88	12.71	2.15	1.81	0.142408	7.94	0.624705	366.298	4.38674
60012864917	aa12a43e0431aba6cad813e6cf592638	adenocarcinoma	0	0	no	34.5714	0	no	male	66	54	170	18.6851	1	1	0	ICI+chemotherapy	Nivolumab	PD-1	1	0	1	0	0	0	0	1	0	0	0	0	0	0	0	0	0	0	0	0	197	140	6.19	0.39	3.11	0.502423	2.19	0.353796	63.3441	0.70418
60012881709	b182f4522f4c2bd404284b70e59e325c	adenocarcinoma	0	0	no	49.2857	0	no	male	65	55	162	20.9572	1	0	0	ICI+chemotherapy+antiangiogenic_therapy	Pembrolizumab	PD-1	1	1	0	0	0	0	1	0	0	0	0	0	0	1	1	1	0	0	0	0	494	58	11.93	1.03	1.9	0.159262	8.87	0.743504	260	4.66842
60012882540	3e0aa81c5e8c0650367834264e3665bd	SCC	0	0	no	73	0	no	male	60	56	164	20.8209	1	0	0	ICI+chemotherapy	Tislelizumab	PD-1	1	0	1	0	0	0	0	0	1	0	0	0	0	0	0	0	0	0	0	0	329	102	9.35	0.19	1.22	0.130481	7.91	0.845989	269.672	6.48361
60012887299	c565c3d1129cd2a064b3c4a2b0a70323	adenocarcinoma	0	0	no	32.1429	0	no	male	51	61	167	21.8724	1	1	0	ICI+chemotherapy	Tislelizumab	PD-1	1	0	1	0	0	0	0	1	0	0	0	0	0	0	0	0	0	0	0	0	245	143	6.11	0.68	1.78	0.291326	3.6	0.589198	137.64	2.02247
60012893591	51367c8995a26e51f37f0855067c0fcb	adenocarcinoma	0	0	no	64.2857	0	no	male	62	55	172	18.5911	0	0	0	ICI+chemotherapy	Tislelizumab	PD-1	1	0	1	0	0	0	0	1	0	0	0	0	0	0	0	0	0	0	0	0	214	142	5.83	0.42	1.9	0.325901	3.16	0.542024	112.632	1.66316
60012896988	212f0974a3b7464b31da6ff10b9ec513	SCC	0	0	no	51.7143	0	no	male	66	51	156	20.9566	1	0	0	ICI	Toripalimab	PD-1	0	0	0	0	0	0	0	0	0	0	0	0	0	0	0	0	0	0	0	0	277	108	6.75	0.59	1.96	0.29037	4.08	0.604444	141.327	2.08163
60012901696	67da20f32054d4b81fa76d5815ef3246	SCC	0	0	no	66.2857	0	no	male	52	74	173	24.7252	1	0	0	ICI+chemotherapy	Tislelizumab	PD-1	1	0	1	0	0	0	0	0	1	0	0	0	0	0	0	0	0	0	0	0	72	146	4.01	0.37	1.69	0.421446	1.82	0.453865	42.6036	1.07692
60012902382	6ab68408b00ef6306c9fc38e93af00f4	SCC	0	0	no	71.7143	0	no	male	55	53	167	19.0039	1	1	0	ICI+chemotherapy	Tislelizumab	PD-1	1	0	1	0	0	0	0	0	1	0	0	0	0	0	0	0	0	0	0	0	455	147	8.2	0.78	1.71	0.208537	5.66	0.690244	266.082	3.30994
60012903140	9dfba5c3dba1cd870a169292f2f1f4e1	SCC	0	0	no	61.2857	0	no	male	60	65	164	24.1672	0	0	0	ICI+chemotherapy	Pembrolizumab	PD-1	1	0	1	0	0	0	0	1	0	0	0	0	0	0	0	0	0	0	0	0	459	86	8.89	0.66	1.53	0.172103	6.61	0.743532	300	4.32026
60012932095	f67dfcc05be118ca9d292b02dbfb2101	SCLC	0	0	no	50	0	no	male	72	64	171	21.8871	1	1	0	ICI+chemotherapy	Tislelizumab	PD-1	1	0	0	0	1	0	0	0	1	0	0	0	0	0	0	0	0	0	1	1	172	137	5.26	0.1	1.34	0.254753	3.82	0.726236	128.358	2.85075
60012937947	63d472d41ca745eac319e90060aef403	SCLC	0	0	no	37.1429	0	no	female	57	55	157	22.2321	0	0	0	ICI	Atezolizumab	PD-L1	0	0	0	0	0	0	0	0	0	0	0	0	0	0	0	0	0	0	0	0	144	123	2.59	0.28	0.46	0.177606	1.79	0.69112	313.043	3.8913
60012940176	fdc19c5caf061672347dd514fae7e6ba	SCLC	0	0	no	58.8571	0	no	male	57	70	170	24.2215	1	1	0	ICI+chemotherapy+antiangiogenic_therapy	Durvalumab	PD-L1	1	0	0	0	1	0	0	1	0	0	0	0	0	1	0	1	0	0	0	0	343	128	3.84	0.39	0.76	0.197917	2.57	0.669271	451.316	3.38158
60012946088	f20f1119436c0dd044b64e23ba925afa	adenocarcinoma	0	0	no	50.8571	0	no	male	53	65	176	20.984	0	0	0	ICI+chemotherapy	Durvalumab	PD-L1	1	1	0	0	0	0	0	0	0	0	0	0	0	0	0	0	0	1	0	0	90	110	4.12	0.54	0.79	0.191748	2.7	0.65534	113.924	3.41772
60012952167	703699a6ced8c39af6aa66d80e21e67b	adenosquamous carcinoma	0	0	no	57.2857	0	no	female	76	48	159	18.9866	0	0	0	ICI+chemotherapy	Tislelizumab	PD-1	1	0	1	0	0	0	0	1	0	0	0	0	0	0	0	0	0	0	0	0	191	123	4.62	0.42	1.32	0.285714	2.79	0.603896	144.697	2.11364
60012954882	68cf177a9c3be47d51cce5038d278513	adenocarcinoma	0	0	no	57.4286	0	no	male	61	62	172	20.9235	0	0	0	ICI+chemotherapy+antiangiogenic_therapy	Tislelizumab	PD-1	1	1	0	0	0	0	0	0	1	0	0	0	0	1	1	0	0	0	0	0	194	148	14.01	0.61	3.03	0.216274	10.32	0.736617	64.0264	3.40594
60012961798	3caade7c4056abb3cbdcc204ad03a9ba	SCC	0	0	no	53	0	no	female	56	72	160	28.125	0	0	0	ICI+chemotherapy	Durvalumab	PD-L1	1	0	1	0	0	0	0	0	1	0	0	0	0	0	0	0	0	0	0	0	242	125	6.88	0.5	1.77	0.257267	4.53	0.65843	136.723	2.55932
60013000131	27c738391dce7fb0b37cf8344a80d21b	SCC	0	0	no	63.5714	0	no	male	73	45	170	15.5709	1	1	0	ICI+chemotherapy	Tislelizumab	PD-1	1	0	1	0	0	0	0	0	1	0	0	0	0	0	0	0	0	0	0	0	111	108	5.76	0.52	1.6	0.277778	2.99	0.519097	69.375	1.86875
60013005973	5ebddd3c93bc3274ea0cc6f17a4d8f2e	SCC	0	0	no	69.7143	0	no	male	59	58	173	19.3792	0	0	0	ICI+chemotherapy	Tislelizumab	PD-1	1	0	1	0	0	0	0	1	0	0	0	0	0	0	0	0	0	0	0	0	330	84	5.1	0.55	0.78	0.152941	3.7	0.72549	423.077	4.74359
60013030061	13b201860c71608b43b08b795fe44319	SCC	0	0	no	36.1429	0	no	female	65	60	161	23.1473	1	1	0	ICI+antiangiogenic_therapy	Tislelizumab	PD-1	0	0	0	0	0	0	0	0	0	0	0	0	0	1	0	1	0	0	0	0	150	127	5.29	0.47	1.2	0.226843	3.52	0.665406	125	2.93333
60013031897	e56d15f007aa21032905b69935445872	SCC	0	0	no	52.1429	0	no	male	75	55	168	19.487	1	1	0	ICI+chemotherapy	Pembrolizumab	PD-1	1	0	1	0	0	0	0	0	1	0	0	0	0	0	0	0	0	0	0	0	372	113	8.21	0.78	1.65	0.200974	5.72	0.696711	225.455	3.46667
60013033241	bf456b2567c85fb7652996dc43e3e40f	adenocarcinoma	0	0	no	61.1429	0	no	female	53	50	157	20.2848	0	0	0	ICI+chemotherapy	Pembrolizumab	PD-1	1	1	0	0	0	0	0	0	1	0	0	0	0	0	0	0	0	0	0	0	547	114	13.8	0.77	1.73	0.125362	10.36	0.750725	316.185	5.98844
60013036654	d292d25a615d88d28c2656f7c772b285	adenocarcinoma	0	0	no	55.5714	0	no	male	66	74	170	25.6055	0	1	0	ICI+chemotherapy	Tislelizumab	PD-1	1	1	0	0	0	0	0	1	0	0	0	0	0	0	0	0	0	0	0	0	168	151	6.84	0.61	2.8	0.409357	2.83	0.413743	60	1.01071
60013042466	b2f1ba41f30e45c46ff6adda3a938523	NET	0	0	no	38.4286	0	no	male	61	84	177	26.8122	1	1	0	ICI	Tislelizumab	PD-1	0	0	0	0	0	0	0	0	0	0	0	0	0	0	0	0	0	0	0	0	207	123	10.15	0.74	2.01	0.19803	7.29	0.718227	102.985	3.62687
60013043468	d4dec7d2812e25af9d40ebb6b8259e81	adenocarcinoma	0	0	no	32.5714	0	no	female	52	46	160	17.9688	0	0	0	ICI+chemotherapy	Tislelizumab	PD-1	1	1	0	0	0	0	0	0	0	0	0	0	0	0	0	0	0	0	0	0	248	77	9.37	0.24	0.31	0.0330843	8.5	0.90715	800	27.4194
60013045226	8f6478058ad290f38b9005531be98c82	adenocarcinoma	0	0	no	58.5714	0	no	male	54	80	180	24.6914	0	0	1	ICI+chemotherapy	Tislelizumab	PD-1	1	1	1	0	0	0	1	0	0	0	0	0	0	0	0	0	0	0	0	0	197	140	6.09	0.72	1.28	0.210181	4.03	0.661741	153.906	3.14844
60013045796	3340663cdeb852ee56b75909b3597f12	SCLC	1	1	Myocarditis	28	0	no	male	63	68	160	26.5625	0	0	0	ICI+chemotherapy	Durvalumab	PD-L1	1	0	0	0	1	0	0	1	0	0	0	0	0	0	0	0	0	0	0	0	237	145	5.72	0.72	1.49	0.26049	3.27	0.571678	159.06	2.19463
60013061389	8d71a675fdcd4dfa4babeaa0bb385368	SCC	0	0	no	60.5714	0	no	male	50	87	172	29.543	0	0	0	ICI+chemotherapy	Sintilimab	PD-1	1	1	0	0	0	0	0	1	1	0	0	0	0	0	0	0	0	0	0	0	154	135	8.67	0.81	1.01	0.116494	6.07	0.700115	152.475	6.0099
60013066974	c63c986804f0ccb43bba1a3e9e3de1e3	SCC	0	0	no	60.1429	0	no	male	59	81	170	28.0277	0	0	0	ICI+chemotherapy	Tislelizumab	PD-1	1	0	1	0	0	0	0	0	1	0	0	0	0	0	0	0	0	0	0	0	259	127	6.25	0.55	1.15	0.184	4.41	0.7056	225.217	3.83478
60013067106	47f7202002f762faa2209e56b79805b5	SCC	0	0	no	52.7143	0	no	male	66	55	152	23.8054	1	1	0	ICI+chemotherapy	Tislelizumab	PD-1	1	0	1	0	0	0	0	0	0	0	0	0	0	0	0	0	0	0	0	0	281	99	6.37	0.44	0.94	0.147567	4.83	0.758242	298.936	5.1383
60013071611	6de21cce5d55cbb494bd0c5bca8e15e8	adenocarcinoma	0	0	no	59.4286	0	no	male	54	66	167	23.6652	1	1	0	ICI+chemotherapy	Tislelizumab	PD-1	1	0	1	0	0	0	1	0	0	0	0	0	0	0	0	0	0	0	0	0	215	147	8.52	1	1.59	0.18662	5.73	0.672535	135.22	3.60377
60013071841	679f3d6f17fee4ac060287fa338cd8c6	adenocarcinoma	0	0	no	50	0	no	male	64	52	158	20.83	0	0	0	ICI+chemotherapy+antiangiogenic_therapy	Tislelizumab	PD-1	1	0	0	0	0	0	0	1	0	0	0	0	0	1	1	0	0	1	1	0	283	101	5.72	1.03	1.58	0.276224	2.98	0.520979	179.114	1.88608
60013074224	81ac7ca170e5133296346abc82048f31	SCC	0	0	no	59.1429	0	no	female	58	50	150	22.2222	0	0	0	ICI+chemotherapy	Tislelizumab	PD-1	1	1	0	0	0	0	0	0	1	0	0	0	0	0	0	0	0	0	0	0	250	112	3.88	0.5	1.02	0.262887	2.14	0.551546	245.098	2.09804
60013081568	0b9ca0143e60e81173cc3d9a6408e641	SCC	0	0	no	61.5714	0	no	male	54	87	164	32.3468	1	0	0	ICI+chemotherapy	Durvalumab	PD-L1	1	0	0	0	1	0	1	0	0	0	0	0	0	0	0	0	0	0	0	0	329	139	7.43	0.6	3.21	0.432032	3.3	0.444145	102.492	1.02804
60013084228	86e6735574e24be6d31c775d48a7aba8	adenocarcinoma	0	0	no	49.7143	0	no	male	50	73	165	26.8136	0	0	0	ICI+chemotherapy	Pembrolizumab	PD-1	1	0	1	0	0	0	0	1	0	0	0	0	0	0	0	0	0	0	0	1	131	143	5.74	0.19	1.34	0.233449	4.1	0.714286	97.7612	3.0597
60013085079	c4500036e873aaa2b138d71f047282a8	adenocarcinoma	0	0	no	51.8571	0	no	male	63	64	179	19.9744	1	0	0	ICI+chemotherapy+antiangiogenic_therapy	Pembrolizumab	PD-1	1	1	0	0	0	0	0	1	0	0	0	0	0	1	1	0	0	0	0	0	335	162	6.1	0.74	1.35	0.221311	3.85	0.631148	248.148	2.85185
60013089800	caba23bd24c20ea2d64bdab58befcbc2	adenocarcinoma	0	0	no	57.2857	0	no	female	59	47	165	17.2635	0	0	0	ICI+chemotherapy+antiangiogenic_therapy	Pembrolizumab	PD-1	1	1	1	0	0	0	0	0	1	0	0	0	0	1	1	0	0	0	0	0	336	109	6.5	0.67	1.64	0.252308	3.3	0.507692	204.878	2.0122
60013094757	09230fcc1ce3f6c4f5c2e7a316a26b64	adenocarcinoma	0	0	no	57.8571	0	no	male	73	58	168	20.5499	1	0	0	ICI+chemotherapy	Tislelizumab	PD-1	1	1	1	0	0	0	0	0	0	0	0	0	0	0	0	0	0	0	0	0	578	80	13.15	1.75	1.49	0.113308	9.52	0.723954	387.919	6.38926
60013098348	38de0d7f2ebe67213a69d728a0502dc5	adenocarcinoma	0	0	no	59.8571	0	no	male	69	59	170	20.4152	1	0	0	ICI+chemotherapy	Tislelizumab	PD-1	1	0	0	0	0	0	0	0	1	0	0	0	0	0	0	0	0	0	0	0	403	98	7.08	0.74	1.16	0.163842	4.91	0.693503	347.414	4.23276
60013102148	6438735a78dee9e24f0bc7a79388a54d	SCC	0	0	no	58.1429	0	no	male	61	73	167	26.1752	1	0	0	ICI+chemotherapy	Tislelizumab	PD-1	1	1	0	0	0	0	0	1	0	0	0	0	0	0	0	0	0	0	0	0	225	100	12.48	1.44	2.31	0.185096	8.67	0.694712	97.4026	3.75325
60013105919	563b599d8716276c74cf6bc600e77d67	adenocarcinoma	0	0	no	53.7143	0	no	female	52	52	166	18.8707	0	0	0	ICI+chemotherapy	Tislelizumab	PD-1	1	1	0	0	0	0	1	0	0	0	0	0	0	0	0	0	0	0	0	0	222	122	4.61	0.46	1.6	0.347072	2.25	0.488069	138.75	1.40625
60013106733	b0f804e913db336337e21cd0b596f176	adenocarcinoma	0	0	no	56.8571	0	no	male	27	75	168	26.5731	0	0	0	ICI+chemotherapy	Pembrolizumab	PD-1	1	0	1	0	0	0	1	1	0	0	0	0	0	0	0	0	0	0	0	0	365	131	10.9	0.84	2.08	0.190826	5.27	0.483486	175.481	2.53365
60013107374	bee033070c5fb33e897678e11b1e9c72	adenocarcinoma	0	0	no	58.8571	0	no	male	61	60	178	18.937	1	1	0	ICI+chemotherapy	Sintilimab	PD-1	1	1	0	0	0	0	1	0	0	0	0	0	0	0	0	0	0	0	0	0	229	125	5.28	0.53	0.88	0.166667	3.82	0.723485	260.227	4.34091
60013111384	498f177a6be4f38706f63532ecc80820	SCC	0	0	no	60.8571	0	no	male	69	77	171	26.3329	0	0	0	ICI+chemotherapy	Tislelizumab	PD-1	1	0	1	0	0	0	0	1	0	0	0	0	0	0	0	0	0	0	0	0	225	106	4.49	0.34	1.28	0.285078	2.84	0.632517	175.781	2.21875
60013118552	b28ebe9c56bd226ff775e4aae8a8761c	adenocarcinoma	0	0	no	52.8571	0	no	female	73	65	170	22.4913	0	0	0	ICI+chemotherapy	Pembrolizumab	PD-1	1	0	0	0	0	0	0	1	0	0	0	0	0	0	0	0	0	0	1	0	251	82	7.01	0.64	2.17	0.309558	4.09	0.583452	115.668	1.88479
60013121167	537a53163eaac2613357d4904d585e8a	SCC	1	1	Arrhythmia	6.5	1	First-Degree Atrioventricular Block (First-Degree AV Block)	male	57	56	170	19.3772	1	0	0	ICI+chemotherapy+antiangiogenic_therapy	Tislelizumab	PD-1	1	0	1	1	1	0	1	0	0	0	0	0	0	1	0	1	0	0	0	0	351	149	8.3	0.73	1.47	0.177108	5.89	0.709639	238.776	4.0068
60013122231	8807997aa47820a3a4538f54d319a7b6	SCC	0	0	no	56	0	no	male	66	60	170	20.7612	0	0	0	ICI+chemotherapy	Pembrolizumab	PD-1	1	0	1	0	0	0	0	1	0	0	0	0	0	0	0	0	0	0	0	0	395	117	9.46	0.52	1.16	0.122622	6.2	0.655391	340.517	5.34483
60013124671	b2167d4c19728a72770831cc0fa9be7c	SCC	0	0	no	61.5714	0	no	male	71	55	165	20.202	1	1	0	ICI+chemotherapy	Pembrolizumab	PD-1	1	0	1	0	0	0	1	0	0	0	0	0	0	0	0	0	0	0	1	1	421	126	11.02	1.17	1.72	0.15608	7.24	0.656987	244.767	4.2093
60013128756	82b129e1890c14f294f2ed44bc22ea13	adenocarcinoma	0	0	no	52.7143	0	no	male	51	45	131	26.2222	1	0	0	ICI+chemotherapy	Tislelizumab	PD-1	1	1	0	0	0	0	0	0	1	0	0	0	0	0	0	0	0	0	0	0	182	132	5.59	0.59	1.18	0.211091	3.57	0.63864	154.237	3.02542
60013130054	c7ddbe2e7371606abd8d4a9491f3ce52	adenocarcinoma	0	0	no	57.5714	0	no	male	72	53	167	18.8246	1	1	0	ICI+chemotherapy	Tislelizumab	PD-1	1	1	0	0	0	0	0	1	0	0	0	0	0	0	0	0	0	0	0	0	244	137	6.73	0.56	0.74	0.109955	5.22	0.775632	329.73	7.05405
60013133381	97513f1d2df1a98fe3da693f3cd95f35	adenocarcinoma	0	0	no	53.4286	0	no	male	49	85	172	28.7317	1	0	0	ICI+chemotherapy+antiangiogenic_therapy	Sintilimab	PD-1	1	1	0	0	0	0	0	0	1	0	0	0	0	1	1	0	0	0	0	0	254	158	7.43	0.78	1.33	0.179004	5.31	0.71467	190.977	3.99248
60013142714	653679916bb52b8390ae428d43d0a22e	SCC	0	0	no	50.8571	0	no	male	68	62	176	20.0155	1	0	0	ICI+chemotherapy	Sintilimab	PD-1	1	0	1	0	0	0	1	0	0	0	0	0	0	0	0	0	0	0	0	0	288	141	7.9	0.56	1.49	0.188608	5.66	0.716456	193.289	3.79866
60013170609	9564ba26c487a157ba737252cf91aa31	adenocarcinoma	0	0	no	49.2857	0	no	male	79	65	174	21.4692	0	0	0	ICI	Tislelizumab	PD-1	0	0	0	0	0	0	0	0	0	0	0	0	0	0	0	0	0	0	0	0	163	150	8.62	0.57	1.24	0.143852	6.62	0.767981	131.452	5.33871
60013181418	108b5bd22bb6d6f53caebd38efb2ee2a	SCLC	0	0	no	59.7143	0	no	male	62	65	172	21.9713	1	0	0	ICI+chemotherapy	Tislelizumab	PD-1	1	0	0	1	0	0	0	1	0	0	0	0	0	0	0	0	0	0	0	0	414	139	7.69	0.94	2.01	0.261378	4.54	0.590377	205.97	2.25871
60013219535	3e99a1d428eae4aaa20ffd97ed7ce22b	SCC	0	0	no	29.7143	0	no	male	57	63	154	26.5643	1	0	0	ICI	Durvalumab	PD-L1	0	0	0	0	0	0	0	0	0	0	0	0	0	0	0	0	0	0	0	0	157	135	3.7	0.12	1.16	0.313514	2.24	0.605405	135.345	1.93103
60013229367	7ead72c8c91550a16c4764eaff521ece	SCC	0	0	no	54.4286	0	no	male	60	69	158	27.6398	0	0	0	ICI+chemotherapy	Tislelizumab	PD-1	1	1	0	0	0	0	0	0	1	0	0	0	0	0	0	0	0	0	0	0	109	111	6.02	0.19	0.54	0.089701	5.29	0.878738	201.852	9.7963
60013235409	47f5b7de3b38dc73cbb2bf620c1a5bff	adenocarcinoma	0	0	no	53.2857	0	no	male	58	69	170	23.8754	1	1	0	ICI+chemotherapy	Tislelizumab	PD-1	1	0	1	0	0	0	0	0	1	0	0	0	0	0	0	0	0	0	0	0	406	115	6.59	0.59	1.39	0.210926	4.51	0.68437	292.086	3.2446
60013240648	9d7cbbce74d5ed9eb58bee0a6ed08055	adenocarcinoma	0	0	no	53.1429	0	no	male	38	55	159	21.7555	1	0	0	ICI+chemotherapy+antiangiogenic_therapy	Pembrolizumab	PD-1	1	0	1	0	0	0	1	0	0	0	0	0	0	1	0	1	0	0	0	0	286	123	7.38	0.77	1.59	0.215447	4.67	0.632791	179.874	2.93711
60013246576	035eee598f8e40a0d1ac51c5b7a57844	SCC	0	0	no	58	0	no	male	77	51	163	19.1953	1	0	0	ICI+chemotherapy	Tislelizumab	PD-1	1	0	1	0	0	0	0	1	1	0	0	0	0	0	0	0	0	0	0	0	275	95	5.96	0.59	0.9	0.151007	4.45	0.746644	305.556	4.94444
60013248976	ada9a45107144b3c82b11836cb390372	adenocarcinoma	0	0	no	26.5714	0	no	male	66	67	161	25.8478	1	1	0	ICI+chemotherapy	Pembrolizumab	PD-1	1	0	1	0	0	0	0	0	1	0	0	0	0	0	0	0	0	0	0	0	146	130	4.87	0.4	2.24	0.459959	2.1	0.431211	65.1786	0.9375
60013256001	87aff2f3588e532a8938cd92739e8704	SCC	0	0	no	56.7143	0	no	male	71	62	160	24.2188	1	1	0	ICI+chemotherapy	Toripalimab	PD-1	1	0	1	0	0	0	0	0	1	0	0	0	0	0	0	0	0	0	0	0	391	89	11.37	1.12	1.29	0.113456	8.91	0.783641	303.101	6.90698
60013256092	ead490e85a92242728840126d601bfa7	SCLC	0	0	no	50.2857	0	no	male	68	80	166	29.0318	1	0	0	ICI+chemotherapy	Durvalumab	PD-L1	1	0	0	0	1	0	0	1	0	0	0	0	0	0	0	0	0	0	1	0	196	123	6.83	0.5	1.77	0.259151	4.37	0.639824	110.734	2.46893
60013256216	bf519770d509459e9acaed31169c1744	adenocarcinoma	0	0	no	57.5714	0	no	male	73	69	173	23.1548	1	1	0	ICI+antiangiogenic_therapy	Tislelizumab	PD-1	0	0	0	0	0	0	0	0	0	0	0	0	0	1	1	0	0	0	0	0	175	121	4.28	0.71	1.34	0.313084	1.93	0.450935	130.597	1.4403
60013256299	1d9ed39795980722281da48728271b7d	adenocarcinoma	0	0	no	50.5714	0	no	male	76	60	168	21.2585	1	0	0	ICI	Camilizumab	PD-1	0	0	0	0	0	0	0	0	0	0	0	0	0	0	0	0	0	0	0	0	181	115	4.43	0.39	0.83	0.187359	2.81	0.634312	218.072	3.38554
60013259400	890adbd4c979d9a52360bc74303bba98	adenocarcinoma	0	0	no	52.7143	0	no	female	57	50	154	21.0828	0	0	0	ICI+chemotherapy	Tislelizumab	PD-1	1	0	1	0	0	0	0	1	0	0	0	0	0	0	0	0	0	0	0	0	361	108	5.58	0.47	1.4	0.250896	3.63	0.650538	257.857	2.59286
60013263309	400f2b46a0ddec72ab34de815bba0e6b	adenocarcinoma	0	0	no	54.1429	0	no	female	62	43	155	17.898	0	0	0	ICI+chemotherapy	Tislelizumab	PD-1	1	1	0	0	0	0	1	0	0	0	0	0	0	0	0	0	0	0	0	0	251	149	10.67	0.95	2.15	0.2015	7.04	0.659794	116.744	3.27442
60013267245	1457268d49f36ddce0362e6ce545e9ac	SCC	0	0	no	53	0	no	male	77	71	177	22.6627	1	1	0	ICI+chemotherapy	Pembrolizumab	PD-1	1	0	1	0	0	0	0	0	0	0	0	0	0	0	0	0	0	0	1	0	195	115	6.1	0.69	1.15	0.188525	3.96	0.64918	169.565	3.44348
60013268589	0d8f04f8f969c213271f087cbc139039	SCC	0	0	no	47	0	no	male	58	72	172	24.3375	1	0	0	ICI+chemotherapy	Tislelizumab	PD-1	1	0	1	0	1	0	0	1	1	0	0	0	0	0	0	0	0	0	0	0	273	136	4.85	0.41	0.99	0.204124	3.34	0.68866	275.758	3.37374
60013268959	ebd09bbe20e53eda97d6a9ba3cbf2c2a	SCC	0	0	no	57.1429	0	no	male	68	52	172	17.5771	1	0	1	ICI+chemotherapy	Tislelizumab	PD-1	1	1	0	0	0	0	0	0	1	0	0	0	0	0	0	0	0	0	0	0	293	118	5.77	0.51	1.19	0.206239	3.98	0.689775	246.218	3.34454
60013269429	38fbcf3afbff91532b1e6cc401d87e9c	adenosquamous carcinoma	0	0	no	54	0	no	male	73	55	164	20.4491	1	0	0	ICI+chemotherapy	Tislelizumab	PD-1	1	0	1	0	0	0	0	0	1	0	0	0	0	0	0	0	0	0	0	0	164	123	8.65	0.08	0.99	0.114451	7.55	0.872832	165.657	7.62626
60013270901	20b0ef396a6232ce3fe356bd1fd0e368	SCLC	0	0	no	50.8571	0	no	male	64	54	158	21.6311	0	0	0	ICI+chemotherapy	Durvalumab	PD-L1	1	0	0	0	1	0	0	1	0	0	0	0	0	0	0	0	0	0	0	0	245	146	7.16	0.68	2.52	0.351955	3.56	0.497207	97.2222	1.4127
60013270915	0a1dce7924ce9b2186d99a2ae5d2b578	adenocarcinoma	0	0	no	51.5714	0	no	female	72	56	157	22.719	0	0	0	ICI+chemotherapy	Pembrolizumab	PD-1	1	0	1	0	0	0	0	1	0	0	0	0	0	0	0	0	0	0	0	0	510	130	9.62	0.69	2.59	0.269231	5.97	0.620582	196.911	2.30502
60013271576	8efc5662848699a593cecd173ac98465	SCC	0	0	no	52.5714	0	no	male	68	49	159	19.3821	1	1	0	ICI+chemotherapy	Pembrolizumab	PD-1	1	0	1	0	0	0	0	0	1	0	0	0	0	0	0	0	0	0	0	0	281	122	8.5	0.7	1.44	0.169412	6	0.705882	195.139	4.16667
60013274703	07a1776ab8b00d5a8fc6ff5bc1808b0c	SCC	0	0	no	51.8571	0	no	male	57	71	170	24.6713	1	1	0	ICI+chemotherapy	Sintilimab	PD-1	1	0	0	1	0	0	1	0	0	0	0	0	0	0	0	0	0	0	0	0	242	152	7.76	0.54	1.83	0.235825	4.87	0.627577	132.24	2.6612
60013278722	6e554edba42f6d93be12972e69e25545	SCC	0	0	no	52.7143	0	no	male	72	44	168	15.4478	1	0	0	ICI+chemotherapy	Tislelizumab	PD-1	1	0	1	0	0	0	0	0	0	0	0	0	0	0	0	0	0	0	0	0	193	123	5.24	0.69	1.29	0.246183	3.15	0.601145	149.612	2.44186
60013283845	9d71e3de4f805616a85ae855e627a835	adenocarcinoma	0	0	no	36.1429	0	no	female	65	73	162	27.8159	0	0	0	ICI+chemotherapy	Pembrolizumab	PD-1	1	0	0	1	0	0	0	0	0	0	0	0	0	0	0	0	0	1	0	0	316	109	8.91	0.66	1.29	0.144781	6.83	0.766554	244.961	5.29457
60013289011	db64ac004dc3ba8a024e00319ece6fce	adenocarcinoma	0	0	no	32.5714	0	no	male	69	53	170	18.3391	0	0	0	ICI	Tislelizumab	PD-1	0	0	0	0	0	0	0	0	0	0	0	0	0	0	0	0	0	0	0	0	165	130	12.73	0.88	1.41	0.110762	10.28	0.807541	117.021	7.29078
60013293451	19d8ebec3ed1403cc674d8812eb2f4d0	adenocarcinoma	0	0	no	36.2857	0	no	male	68	64	174	21.1389	1	1	0	ICI+chemotherapy+antiangiogenic_therapy	Sintilimab	PD-1	1	1	1	0	0	0	0	0	1	0	0	0	0	1	1	0	0	0	0	0	230	120	6.1	0.72	1.01	0.165574	4.11	0.67377	227.723	4.06931
60013293852	246d79a7e62a1f5f9c65442c55dbd70b	adenocarcinoma	0	0	no	52	0	no	male	65	60	174	19.8177	1	1	0	ICI+chemotherapy+antiangiogenic_therapy	Sintilimab	PD-1	1	1	0	0	0	0	0	1	1	0	0	0	0	1	1	0	0	0	0	0	345	140	9.31	0.17	1.32	0.141783	7.81	0.838883	261.364	5.91667
60013294064	d70a294254ca37f2fee5630156f69152	adenocarcinoma	0	0	no	47.5714	0	no	male	50	72	178	22.7244	1	0	0	ICI+chemotherapy	Pembrolizumab	PD-1	1	1	0	0	0	0	1	0	0	0	0	0	0	0	0	0	0	0	1	0	206	133	7.97	0.7	2.84	0.356336	4.37	0.548306	72.5352	1.53873
60013294183	24e1d6e2d44bb8b72ffa96b6eafd6a1a	SCC	0	0	no	54.1429	0	no	male	61	71	167	25.4581	1	0	1	ICI+chemotherapy	Tislelizumab	PD-1	1	0	1	0	0	0	0	1	0	0	0	0	0	0	0	0	0	0	0	0	195	152	4.72	0.49	1.52	0.322034	2.59	0.548729	128.289	1.70395
60013313862	d5807c7c6fcce820a423b6dae57922e9	adenocarcinoma	0	0	no	46.4286	0	no	male	53	80	171	27.3588	1	0	0	ICI+chemotherapy	Tislelizumab	PD-1	1	1	0	0	0	0	0	1	0	0	0	0	0	0	0	0	0	0	0	0	601	110	5.18	0.8	2.32	0.447876	1.61	0.310811	259.052	0.693966
60013320829	de379ceed93da82730331d76471e6ff4	adenocarcinoma	0	0	no	50.4286	0	no	male	59	60	165	22.0386	0	0	0	ICI+chemotherapy	Pembrolizumab	PD-1	1	0	1	0	0	0	0	1	0	0	0	0	0	0	0	0	0	0	0	0	292	111	9.95	0.54	2.33	0.234171	6.91	0.694472	125.322	2.96567
60013324052	7aa93add3abb30a5f1ed875b5ad38975	adenocarcinoma	0	0	no	54.2857	0	no	male	69	50	172	16.901	1	1	0	ICI+chemotherapy+antiangiogenic_therapy	Tislelizumab	PD-1	1	0	1	0	0	0	0	0	1	0	0	0	0	1	0	1	0	0	0	0	326	112	6.28	0.59	1.09	0.173567	4.48	0.713376	299.083	4.11009
60013325407	dc2e4d94df58cf5f8fa96dbb9757e4c2	adenocarcinoma	0	0	no	54.4286	0	no	male	46	63	179	19.6623	0	0	0	ICI+chemotherapy	Tislelizumab	PD-1	1	0	1	0	0	0	0	0	1	0	0	0	0	0	0	0	0	0	0	0	149	151	5.83	0.44	1.82	0.312178	3.39	0.581475	81.8681	1.86264
60013325436	c15902e85f335225d0fbfe731521394a	adenocarcinoma	0	0	no	50	0	no	male	66	66	170	22.8374	0	0	0	ICI+chemotherapy	Pembrolizumab	PD-1	1	0	1	0	0	0	0	0	1	0	0	0	0	0	0	0	0	0	0	0	147	113	6.8	0.47	1.17	0.172059	5	0.735294	125.641	4.2735
60013327378	3f8cc5e82637d627f29f67051a7053ed	adenocarcinoma	0	0	no	54.2857	0	no	male	53	50	167	18.0358	0	0	0	ICI+chemotherapy	Durvalumab	PD-L1	1	0	0	0	1	0	0	0	1	0	0	0	0	0	0	0	0	0	0	0	330	130	7.89	0.51	1.36	0.17237	5.97	0.756654	242.647	4.38971
60013329066	e0441bd8be6e9b76801c668d214aaccd	adenocarcinoma	0	0	no	54.2857	0	no	male	79	62	171	21.2031	0	0	0	ICI+chemotherapy	Tislelizumab	PD-1	1	0	1	0	0	0	0	0	0	0	0	0	0	0	0	0	0	0	0	0	256	122	5.95	0.78	0.74	0.12437	4.17	0.70084	345.946	5.63514
60013329711	46ffe40af8444f763c5fcddf95a3b20c	adenocarcinoma	0	0	no	54.2857	0	no	male	72	68	170	23.5294	0	0	0	ICI+chemotherapy+antiangiogenic_therapy	Tislelizumab	PD-1	1	0	1	0	0	0	0	0	1	0	0	0	0	1	0	1	0	0	0	0	286	89	5.08	0.5	0.74	0.145669	3.7	0.728346	386.486	5
60013333613	69294a5c2a9000426ba4df312ef1505d	SCLC	0	0	no	49.8571	0	no	male	66	60	164	22.3081	1	0	0	ICI+chemotherapy	Durvalumab	PD-L1	1	0	0	0	1	0	0	1	0	0	0	0	0	0	0	0	0	0	0	0	105	119	7.06	0.17	0.57	0.0807365	6.2	0.878187	184.211	10.8772
60013337480	a7aff64358afab4f585e352c4691f2f9	SCC	0	0	no	49.4286	0	no	male	68	70	163	26.3465	1	0	0	ICI+chemotherapy	Tislelizumab	PD-1	1	0	1	0	0	0	1	0	0	0	0	0	0	0	0	0	0	1	1	0	359	136	7.36	0.58	1.46	0.19837	5.22	0.709239	245.89	3.57534
60013338461	67560b107e0f2513caefb7eef22437b0	adenocarcinoma	0	0	no	49.8571	0	no	male	85	45	165	16.5289	1	1	0	ICI+chemotherapy	Pembrolizumab	PD-1	1	1	0	0	0	0	0	0	0	0	0	0	0	0	0	0	0	0	0	0	178	113	4.61	0.57	0.72	0.156182	3.16	0.685466	247.222	4.38889
60013342847	a8b0b96a6b2a43d4c799c380964b8ac6	adenocarcinoma	0	0	no	46.8571	0	no	male	59	70	164	26.0262	1	0	0	ICI+chemotherapy	Tislelizumab	PD-1	1	1	0	0	0	0	1	0	1	0	0	0	0	0	0	0	0	0	0	0	284	155	6.34	0.23	0.51	0.0804416	5.57	0.878549	556.863	10.9216
60013345922	9ed10bcff76d269b82ad1acdf0a4ae61	SCC	0	0	no	53.5714	0	no	male	54	57	170	19.7232	1	0	0	ICI+chemotherapy	Tislelizumab	PD-1	1	0	1	0	0	0	0	1	0	0	0	0	0	0	0	0	0	0	0	0	378	107	11.93	1.33	2.11	0.176865	8.28	0.694049	179.147	3.92417
60013348717	398f5efcbe8d53fea29f3682876f06e4	SCLC	0	0	no	49.5714	0	no	male	52	60	164	22.3081	0	0	0	ICI+chemotherapy	Durvalumab	PD-L1	1	0	0	0	0	0	0	1	0	0	0	0	0	0	0	0	0	0	0	0	150	120	7.62	0.64	1.81	0.237533	5.11	0.670604	82.8729	2.8232
60013349700	db911963cc1cc6554ccc3ed947bf78b1	SCC	0	0	no	53.4286	0	no	male	66	68	160	26.5625	1	1	0	ICI+chemotherapy	Tislelizumab	PD-1	1	0	1	0	0	0	0	1	0	0	0	0	0	0	0	0	0	0	1	0	262	148	7.91	0.89	2.47	0.312263	4.37	0.552465	106.073	1.76923
60013349717	c332aa5da46bcbf14043da0878fcbfcb	adenocarcinoma	0	0	no	36.2857	0	no	male	64	51	162	19.433	1	1	1	ICI+chemotherapy+antiangiogenic_therapy	Tislelizumab	PD-1	1	1	0	0	0	0	0	0	1	0	0	0	0	1	1	0	0	0	1	0	218	129	5.88	0.6	0.84	0.142857	4.28	0.727891	259.524	5.09524
60013359368	9ca10b0901d58681320e2c05dbcdef24	SCC	0	0	no	29.5714	0	no	male	78	71	179	22.1591	0	0	0	ICI	Pembrolizumab	PD-1	0	0	0	0	0	0	0	0	0	0	0	0	0	0	0	0	0	0	1	0	189	132	4.67	0.39	1.35	0.289079	2.72	0.582441	140	2.01481
60013360855	9505da15957bbfb04547fded304bd7be	SCC	0	0	no	53.1429	0	no	male	64	60	170	20.7612	0	0	0	ICI+chemotherapy	Tislelizumab	PD-1	1	0	1	0	0	0	0	0	1	0	0	0	0	0	0	0	0	0	0	0	180	139	5.39	0.5	1.05	0.194805	3.64	0.675325	171.429	3.46667
60013366290	032351b478de8249a2f03dd02db35d7b	SCLC	0	0	no	29.8571	0	no	male	61	70	173	23.3887	1	0	0	ICI+chemotherapy+antiangiogenic_therapy	Durvalumab	PD-L1	1	0	0	0	0	1	1	0	0	0	0	0	0	1	0	0	1	0	0	0	227	129	8.21	0.68	1.38	0.168088	6.05	0.736906	164.493	4.38406
60013370017	3d8549b1583e63b5b83a0d150423fc4d	SCC	0	0	no	52.8571	0	no	male	73	85	179	26.5285	0	0	1	ICI+chemotherapy	Tislelizumab	PD-1	1	0	1	0	0	0	0	1	1	0	0	0	0	0	0	0	0	0	1	0	229	157	7.74	0.53	2.04	0.263566	5.02	0.648579	112.255	2.46078
60013371028	ecbfefae1adea417900f9a0e0feaad6d	adenocarcinoma	0	0	no	46	0	no	female	47	52	158	20.9101	0	0	0	ICI+chemotherapy	Pembrolizumab	PD-1	1	1	0	0	0	0	0	1	0	0	0	0	0	0	0	0	0	0	0	0	199	95	6.55	0.48	1.35	0.206107	4.34	0.662595	147.407	3.21481
60013379932	a21fa0db390909289408b4c58529c4df	adenocarcinoma	0	0	no	45.4286	0	no	male	68	65	175	21.2245	1	1	0	ICI+chemotherapy	Tislelizumab	PD-1	1	1	0	0	0	0	0	1	0	0	0	0	0	0	0	0	0	0	0	0	147	110	8.05	0.43	0.69	0.0857143	6.93	0.86087	213.043	10.0435
60013388460	e7c982ca61f5add1fadb9fa83b70ee13	SCC	0	0	no	51.8571	0	no	male	72	68	169	23.8087	1	1	0	ICI+chemotherapy	Nivolumab	PD-1	1	0	1	0	0	0	0	0	1	0	0	0	0	0	0	0	0	0	0	0	193	144	7.91	0.57	1.56	0.197219	5.5	0.695322	123.718	3.52564
60013392101	e214e6262ab8c7aad455c3394f113447	adenocarcinoma	0	0	no	49.2857	0	no	male	69	69	166	25.0399	1	0	0	ICI+chemotherapy	Tislelizumab	PD-1	1	1	0	0	0	0	0	0	0	0	0	0	0	0	0	0	0	0	1	0	185	84	7.84	0.75	0.88	0.112245	6.16	0.785714	210.227	7
60013394594	24053d13d9712fa41ae87648a465fa2d	NET	0	0	no	52.4286	0	no	female	50	50	142	24.7967	0	0	0	ICI+chemotherapy	Durvalumab	PD-L1	1	0	0	0	1	1	1	0	1	0	0	0	0	0	0	0	0	0	0	0	210	146	4.3	0.32	1.3	0.302326	2.57	0.597674	161.538	1.97692
60013399309	6fd6db5a126c20b32b9c9c8bb2327d0c	SCC	0	0	no	51.2857	0	no	male	44	75	171	25.6489	0	0	0	ICI+chemotherapy	Tislelizumab	PD-1	1	0	1	0	0	0	0	0	1	0	0	0	0	0	0	0	0	0	0	0	265	145	7.77	0.73	1.42	0.182754	5.53	0.711712	186.62	3.89437
60013399755	3bea1749b6436a1095211c40dfaaa721	adenocarcinoma	0	0	no	49.5714	0	no	female	71	66	173	22.0522	0	0	0	ICI+chemotherapy	Pembrolizumab	PD-1	1	1	0	0	0	0	1	0	0	0	0	0	0	0	0	0	0	0	0	0	241	134	4.55	0.39	1.6	0.351648	2.33	0.512088	150.625	1.45625
60013399757	c0b1830bcf2f4e3c748550cba06a22b6	SCLC	0	0	no	49.8571	0	no	male	62	64	169	22.4082	0	0	0	ICI+chemotherapy	Durvalumab	PD-L1	1	0	0	0	1	0	0	1	0	0	0	0	0	0	0	0	0	0	0	0	206	137	10.32	0.7	2.6	0.251938	6.9	0.668605	79.2308	2.65385
60013404469	89697f5b29cbf12477c25cb3a3f43faf	SCC	0	0	no	39.7143	0	no	male	66	65	170	22.4913	1	0	0	ICI+chemotherapy	Tislelizumab	PD-1	1	0	1	0	0	0	0	0	1	0	0	0	0	0	0	0	0	0	0	0	142	140	8.18	0.59	0.98	0.119804	5.61	0.685819	144.898	5.72449
60013404913	adc76f51c2f9f9e9e93072bd966e2eb8	SCLC	0	0	no	42.7143	0	no	male	55	57	160	22.2656	1	1	0	ICI+chemotherapy	Atezolizumab	PD-L1	1	0	0	0	1	0	1	0	0	0	0	0	0	0	0	0	0	0	0	0	242	128	5.83	0.6	1.96	0.336192	3.17	0.543739	123.469	1.61735
60013414184	66e9e86c343ef96de8d296e31bf21f8a	adenocarcinoma	0	0	no	29.5714	0	no	male	60	54	159	21.3599	1	0	0	ICI+chemotherapy	Durvalumab	PD-L1	1	0	0	0	1	0	0	0	1	0	0	0	0	0	0	0	0	0	0	0	365	118	7.26	0.61	0.73	0.100551	5.9	0.812672	500	8.08219
60013415475	db26299871fe1fc8dffde3bc7eba1aec	adenocarcinoma	0	0	no	43.7143	0	no	male	69	75	174	24.7721	0	0	0	ICI+chemotherapy	Tislelizumab	PD-1	1	0	1	0	0	0	0	1	0	0	0	0	0	0	0	0	0	0	0	0	174	140	9.01	0.67	2.28	0.253052	5.93	0.658158	76.3158	2.60088
60013423321	64acb080f79666eaa86a9906b113b1e5	adenocarcinoma	0	0	no	51.5714	0	no	male	66	70	172	23.5262	1	0	0	ICI+chemotherapy	Tislelizumab	PD-1	1	0	1	0	0	0	0	0	1	0	0	0	0	0	0	0	0	0	0	0	193	129	4.51	0.32	1.03	0.228381	3.05	0.676275	187.379	2.96117
60013428885	9801318811de5c8087a9524a61864ee6	adenocarcinoma	0	0	no	50.2857	0	no	male	73	74	174	24.4418	1	1	0	ICI+chemotherapy	Tislelizumab	PD-1	1	0	1	0	0	0	1	0	0	0	0	0	0	0	0	0	0	0	0	0	193	130	8.21	0.77	1.67	0.20341	5.33	0.649208	115.569	3.19162
60013436359	a1e623ba0f429778b9bfea0a0070ad1b	adenocarcinoma	0	0	no	51.5714	0	no	male	54	51	168	18.0697	0	0	0	ICI+chemotherapy+antiangiogenic_therapy	Tislelizumab	PD-1	1	1	0	0	0	0	1	1	0	0	0	0	0	1	0	0	1	0	0	0	313	136	6.64	0.55	1.93	0.290663	3.9	0.587349	162.176	2.02073
60013441700	7284b4f150927698ae4d4385a5c45113	adenocarcinoma	0	0	no	41.7143	0	no	male	68	46	155	19.1467	0	0	0	ICI+chemotherapy	Tislelizumab	PD-1	1	1	0	0	0	0	0	1	0	0	0	0	0	0	0	0	0	0	0	0	396	104	7.58	0.82	1.48	0.195251	4.84	0.638522	267.568	3.27027
60013460478	3cf6f022fcbd539e6c11bbeaa2745d3a	SCC	0	0	no	50.7143	0	no	male	57	87	179	27.1527	1	1	0	ICI+chemotherapy	Tislelizumab	PD-1	1	0	1	0	0	0	0	0	1	0	0	0	0	0	0	0	0	1	1	0	391	136	10.76	0.88	2.69	0.25	6.17	0.57342	145.353	2.29368
60013462860	20cf530848da2fc74cf597b7e17fd4d2	adenocarcinoma	0	0	no	41.8571	0	no	female	60	54	155	22.4766	0	0	0	ICI+chemotherapy+antiangiogenic_therapy	Sintilimab	PD-1	1	1	1	0	0	0	0	0	1	0	0	0	0	1	1	0	0	0	0	0	345	142	5.42	0.35	0.9	0.166052	3.92	0.723247	383.333	4.35556
60013468532	6fb65a5f57d7ddb89a9dcea57893a9e3	SCC	0	0	no	37.1429	0	no	male	77	54	165	19.8347	1	1	0	ICI+chemotherapy	Sintilimab	PD-1	1	0	1	0	0	0	0	0	0	0	0	0	0	0	0	0	0	0	0	0	291	116	8	0.64	0.82	0.1025	6.44	0.805	354.878	7.85366
60013480037	d5f23930b95b24900c6318457f3b1802	SCLC	0	0	no	36.8571	0	no	male	61	67	167	24.0238	0	0	0	ICI+chemotherapy	Durvalumab	PD-L1	1	0	0	0	1	0	0	1	0	0	0	0	0	0	0	0	0	0	0	0	274	135	7.68	0.93	2.55	0.332031	4.07	0.529948	107.451	1.59608
60013496455	c840a877a16e47636fff5b26ebaa5597	SCLC	0	0	no	50	0	no	male	61	65	176	20.984	0	0	0	ICI+chemotherapy	Durvalumab	PD-L1	1	0	0	0	1	0	0	1	0	0	0	0	0	0	0	0	0	0	1	0	291	136	8.74	0.8	2.11	0.241419	5.52	0.631579	137.915	2.61611
60013502511	b65542104999a7a13b6909204eef2b23	SCLC	0	0	no	39.7143	0	no	male	68	78	176	25.1808	1	0	0	ICI	Durvalumab	PD-L1	0	0	0	0	0	0	0	0	0	0	0	0	0	0	0	0	0	0	1	0	147	78	6.35	0.89	1.41	0.222047	3.95	0.622047	104.255	2.80142
60013503486	7a4cd638567866ffbc70cb945ba9f6b1	SCC	0	0	no	49.7143	0	no	male	45	65	169	22.7583	1	1	0	ICI+chemotherapy+antiangiogenic_therapy	Tislelizumab	PD-1	1	0	1	0	0	0	0	1	1	0	0	0	0	1	0	1	0	0	0	0	495	132	10	0.65	1.47	0.147	7.78	0.778	336.735	5.29252
60013503685	74165f97f0dbf90fd9f2e61d0972ff2d	SCC	0	0	no	47.1429	0	no	male	63	51	165	18.7328	1	1	0	ICI+chemotherapy	Sintilimab	PD-1	1	0	1	0	0	0	0	0	1	0	0	0	0	0	0	0	0	0	0	0	246	132	5.73	0.66	1.88	0.328098	3.07	0.535777	130.851	1.63298
60013503715	1b20a2686831a06e61a58f3c1d10bb1d	adenocarcinoma	0	0	no	48.1429	0	no	female	37	53	164	19.8171	0	0	0	ICI+chemotherapy	Tislelizumab	PD-1	1	1	1	0	0	0	0	1	0	0	0	0	0	0	0	0	0	0	0	0	255	138	7.07	0.42	1.66	0.234795	4.72	0.66761	153.614	2.84337
60013538589	ad6f3623c3bfb717bfc1d626d77f4594	SCC	0	0	no	48.8571	0	no	male	71	50	155	20.8117	1	0	0	ICI+chemotherapy+antiangiogenic_therapy	Pembrolizumab	PD-1	1	0	1	1	0	0	1	1	0	0	0	0	0	1	0	0	1	0	0	0	285	103	6.87	0.53	1.42	0.206696	4.45	0.647744	200.704	3.1338
60013540258	008f99bd7bd5a1092f0976b816dbbb5b	SCLC	0	0	no	42.2857	0	no	female	73	60	150	26.6667	0	0	0	ICI+chemotherapy	Durvalumab	PD-L1	1	0	0	0	1	0	0	0	1	0	0	0	0	0	0	0	0	0	1	0	322	106	8.98	0.56	1.55	0.172606	6.76	0.752784	207.742	4.36129
60013542661	23d3c09fd87530dcd3ce2f8209f207af	SCC	0	0	no	37.1429	0	no	male	58	71	173	23.7228	0	0	0	ICI+chemotherapy	Camilizumab	PD-1	1	0	0	1	0	0	0	1	0	0	0	0	0	0	0	0	0	0	0	0	215	102	9.1	0.77	2.31	0.253846	5.03	0.552747	93.0736	2.17749
60013543458	858012ea9862f5bac037ec22d3590c29	SCC	1	1	Arrhythmia	6	1	Ventricular Premature Beat (VPB)	male	54	73	178	23.04	1	1	0	ICI+chemotherapy	Tislelizumab	PD-1	1	0	1	0	0	0	0	0	1	0	0	0	0	0	0	0	0	0	0	0	512	130	10.02	0.63	1.48	0.147705	7.69	0.767465	345.946	5.19595
60013548707	b5585ccefbc1606787f34d4f28cbbe0c	adenocarcinoma	0	0	no	29	0	no	male	66	75	174	24.7721	1	1	0	ICI	Atezolizumab	PD-L1	0	0	0	0	0	0	0	0	0	0	0	0	0	0	0	0	0	0	0	0	283	116	5.03	0.5	1.15	0.228628	3.14	0.624254	246.087	2.73043
60013551332	149bce82a1b11fc23429c399b02e26fc	adenocarcinoma	0	0	no	43.2857	0	no	female	53	64	158	25.5167	0	0	0	ICI+chemotherapy	Pembrolizumab	PD-1	1	1	0	0	0	0	1	0	0	0	0	0	0	0	0	0	0	0	0	0	324	140	6.5	0.48	2.04	0.313846	3.85	0.592308	158.824	1.88725
60013562069	1507161695826bdec6aa484e143e6d1f	SCLC	0	0	no	43.8571	0	no	male	73	70	167	25.0995	1	0	0	ICI+chemotherapy	Durvalumab	PD-L1	1	0	0	0	1	0	0	1	0	0	0	0	0	0	0	0	0	0	1	0	193	120	4.74	0.36	1.69	0.35654	2.47	0.521097	114.201	1.46154
60013562317	5ea19a03e3ae36aa9bd8e68932bc120c	adenocarcinoma	0	0	no	33.8571	0	no	male	69	73	173	24.224	1	0	0	ICI+chemotherapy	Tislelizumab	PD-1	1	1	0	0	0	0	0	1	0	0	0	0	0	0	0	0	0	0	0	0	164	137	4.87	0.37	1.56	0.320329	2.75	0.564682	105.128	1.76282
60013567347	4bd6ba281fa9683b98f40af3cedf5432	SCC	0	0	no	48	0	no	male	56	65	172	21.9713	0	0	0	ICI+chemotherapy	Tislelizumab	PD-1	1	0	0	1	0	0	0	1	0	0	0	0	0	0	0	0	0	0	0	0	239	142	8.98	0.86	1.53	0.170379	6.4	0.712695	156.209	4.18301
60013572898	dbe420c8545aef8452216c3b91b35c5a	adenocarcinoma	0	0	no	39.5714	0	no	female	33	80	160	31.25	0	0	0	ICI+chemotherapy	Tislelizumab	PD-1	1	1	0	0	0	0	0	1	0	0	0	0	0	0	0	0	0	0	0	0	184	105	4.95	0.49	0.85	0.171717	3.47	0.70101	216.471	4.08235
60013574130	f91501dec0d09b46775780b3964e446a	SCLC	0	0	no	47.5714	0	no	male	58	70	170	24.2215	1	1	0	ICI+chemotherapy	Durvalumab	PD-L1	1	0	0	0	1	0	0	1	1	0	0	0	0	0	0	0	0	0	0	0	138	150	7.45	0.73	1.53	0.205369	4.99	0.669799	90.1961	3.26144
60013588866	1a8abe906c60e443c9e9d0397c0f81e2	SCC	0	0	no	46.7143	0	no	male	62	57	160	22.2656	0	0	0	ICI+chemotherapy	Camilizumab	PD-1	1	1	0	0	0	0	0	1	0	0	0	0	0	0	0	0	0	0	1	1	168	107	14.25	1.03	1.9	0.133333	11.15	0.782456	88.4211	5.86842
60013597320	6e1619e53121e893f906f596d550e5c1	adenocarcinoma	0	0	no	40.1429	0	no	male	70	57	161	21.9899	0	0	0	ICI+chemotherapy	Toripalimab	PD-1	1	1	0	0	0	0	0	1	0	0	0	0	0	0	0	0	0	0	0	0	495	115	9.58	1	1.99	0.207724	6.48	0.676409	248.744	3.25628
60013611953	ff9e34c85acbd9192808eb836d471806	adenocarcinoma	0	0	no	43.4286	0	no	male	60	62	156	25.4767	0	0	0	ICI+chemotherapy+antiangiogenic_therapy	Tislelizumab	PD-1	1	1	0	0	0	0	0	1	0	0	0	0	0	1	0	0	1	0	0	0	310	146	8.34	0.62	1.85	0.221823	5.36	0.642686	167.568	2.8973
60013616462	64f8228e4fa7544780d5634676791280	adenocarcinoma	0	0	no	42.1429	0	no	male	64	60	167	21.5139	1	1	0	ICI+chemotherapy	Sintilimab	PD-1	1	1	0	0	0	0	0	1	0	0	0	0	0	0	0	0	0	0	0	0	148	114	3.82	0.4	1.31	0.342932	1.94	0.507853	112.977	1.48092
60013622738	fbd82681675ba3907554b124086b8072	adenocarcinoma	0	0	no	45.1429	0	no	male	71	58	170	20.0692	1	0	0	ICI+chemotherapy	Tislelizumab	PD-1	1	0	0	0	0	0	0	1	0	0	0	0	0	0	0	0	0	0	0	0	444	90	9.31	0.87	2.11	0.226638	6.08	0.653061	210.427	2.88152
60013625664	159aadecbb0fb6ebd42bce147a089f45	SCC	0	0	no	45.2857	0	no	male	68	51	170	17.474	1	1	0	ICI+chemotherapy	Tislelizumab	PD-1	1	0	1	0	0	0	0	0	1	0	0	0	0	0	0	0	0	0	1	0	232	127	4.95	0.38	1.34	0.270707	2.91	0.587879	173.134	2.17164
60013626993	e9d3e461bc88ff7aa39be881216f100b	SCC	0	0	no	46.8571	0	no	male	66	60	170	20.7612	1	1	0	ICI+chemotherapy	Tislelizumab	PD-1	1	0	1	0	0	0	0	1	0	0	0	0	0	0	0	0	0	1	0	0	135	128	5.67	0.38	1.32	0.232804	3.88	0.684303	102.273	2.93939
60013629888	9c421369d600d44cd846ce15198b7993	SCC	0	0	no	46.8571	0	no	male	55	82	175	26.6122	1	0	0	ICI+chemotherapy	Tislelizumab	PD-1	1	0	0	1	0	0	0	1	0	0	0	0	0	0	0	0	0	0	0	0	333	137	11.01	1.03	1.94	0.176203	7.56	0.686649	171.649	3.89691
60013630039	ba3ed8e665a0b3757d067da187453508	SCLC	0	0	no	41.7143	0	no	male	68	71	170	24.5675	0	0	0	ICI+chemotherapy	Tislelizumab	PD-1	1	1	0	0	0	0	0	1	0	0	0	0	0	0	0	0	0	0	0	0	250	141	9.85	0.79	1.9	0.192893	7	0.71066	131.579	3.68421
60013630231	19dfd1a96a1286a8804dc2fa4cebd618	SCLC	0	0	no	40	0	no	male	57	64	179	19.9744	0	0	0	ICI+chemotherapy	Sintilimab	PD-1	1	0	0	0	1	0	0	0	1	0	0	0	0	0	0	0	0	0	0	0	298	131	12.4	0.2	1.89	0.152419	10.25	0.826613	157.672	5.42328
60013632815	d8b876c1450c40b4c761ba4cdcbee947	SCC	0	0	no	40.2857	0	no	male	66	70	170	24.2215	1	0	0	ICI+chemotherapy	Pembrolizumab	PD-1	1	0	1	0	0	0	0	1	0	0	0	0	0	0	0	0	0	0	0	0	249	133	6.97	0.44	2.2	0.315638	4.11	0.58967	113.182	1.86818
60013636709	1eb15e9eba71221d1c6bb377920bbfaa	adenocarcinoma	0	0	no	42.5714	0	no	male	65	65	181	19.8712	1	0	0	ICI+chemotherapy	Pembrolizumab	PD-1	1	1	0	0	0	0	1	0	0	0	0	0	0	0	0	0	0	0	0	0	126	114	8.08	0.69	1.63	0.201733	5.01	0.62005	77.3006	3.07362
60013650033	fe6c872fef3bfde945bb370a85ac2adb	adenocarcinoma	0	0	no	43.4286	0	no	male	57	90	173	30.0712	0	0	0	ICI+chemotherapy	Tislelizumab	PD-1	1	1	0	0	0	0	0	0	1	0	0	0	0	0	0	0	0	0	0	0	209	130	8.67	0.67	1.37	0.158016	6.33	0.730104	152.555	4.62044
60013653189	753e5e3ba8274031b6a338bf9c950ade	LCC	0	0	no	45.7143	0	no	male	73	68	166	24.677	0	0	0	ICI+chemotherapy	Durvalumab	PD-L1	1	0	0	0	1	0	0	1	0	0	0	0	0	0	0	0	0	0	0	0	225	113	7.2	0.5	1.71	0.2375	4.87	0.676389	131.579	2.84795
60013664559	7bf48fd090ddc630d4f191963f80d9e8	SCC	0	0	no	37.7143	0	no	male	68	58	173	19.3792	1	1	0	ICI+chemotherapy	Tislelizumab	PD-1	1	0	1	0	0	0	0	1	0	0	0	0	0	0	0	0	0	0	0	0	323	137	5.18	0.38	1.62	0.312741	3.07	0.592664	199.383	1.89506
60013676977	8dcdbaf4a67044bd58820c64cf04eaa0	SCC	0	0	no	38.8571	0	no	male	60	73	174	24.1115	1	1	0	ICI+chemotherapy	Camilizumab	PD-1	1	0	0	1	0	0	0	1	0	0	0	0	0	0	0	0	0	0	0	0	235	141	7.05	0.65	0.88	0.124823	5.42	0.768794	267.045	6.15909
60013677549	bc1b7d6d15029fa836083d627f21f635	adenocarcinoma	0	0	no	29.8571	0	no	female	57	57	160	22.2656	0	0	0	ICI+chemotherapy	Pembrolizumab	PD-1	1	0	1	0	0	0	0	0	0	0	0	0	0	0	0	0	0	0	0	0	225	110	5.93	0.28	1.27	0.214165	4.34	0.731872	177.165	3.41732
60013678906	cdabe72965b1fc8c8097aa9ea1bdc703	adenocarcinoma	0	0	no	31	0	no	male	58	60	164	22.3081	0	1	0	ICI+chemotherapy	Toripalimab	PD-1	1	1	0	0	0	0	1	0	0	0	0	0	0	0	0	0	0	0	0	0	237	143	3.12	0.64	0.76	0.24359	1.65	0.528846	311.842	2.17105
60013684118	c2ad30239b8b1bed36e9b31f37232994	adenocarcinoma	0	0	no	34.4286	0	no	male	61	60	170	20.7612	1	0	0	ICI	Pembrolizumab	PD-1	0	0	0	0	0	0	0	0	0	0	0	0	0	0	0	0	0	0	0	0	222	143	4.08	0.33	1.31	0.321078	2.32	0.568627	169.466	1.77099
60013694179	25af4d980f2859b06db783a63505174c	NET	0	0	no	39.7143	0	no	male	70	66	172	22.3094	1	1	0	ICI+chemotherapy+antiangiogenic_therapy	Pembrolizumab	PD-1	1	1	1	0	0	0	0	1	0	0	0	0	0	1	1	0	0	0	0	0	301	114	9.93	0.73	1.35	0.135952	7.73	0.778449	222.963	5.72593
60013698150	916859b8cfcf5b9fc2826a22779ad4e7	adenocarcinoma	0	0	no	41.8571	0	no	male	56	54	164	20.0773	1	1	0	ICI+chemotherapy	Tislelizumab	PD-1	1	0	0	1	0	0	0	1	0	0	0	0	0	0	0	0	0	0	1	0	258	138	8.37	0.74	1.95	0.232975	5.5	0.657109	132.308	2.82051
60013708010	c0bfab6a14241d5a2d253da9648111b6	adenocarcinoma	0	0	no	41.2857	0	no	male	63	71	165	26.079	1	0	0	ICI+chemotherapy	Tislelizumab	PD-1	1	1	0	0	0	0	0	1	0	0	0	0	0	0	0	0	0	0	0	0	234	150	7.04	0.4	1.5	0.213068	5.03	0.714489	156	3.35333
60013714429	cb8e8d311e5f4bbb05981c088c562a8a	adenocarcinoma	0	0	no	39.7143	0	no	male	52	76	160	29.6875	1	1	0	ICI+chemotherapy	Tislelizumab	PD-1	1	0	1	0	0	0	1	0	0	0	0	0	0	0	0	0	0	0	0	0	294	121	5.67	0.49	1.57	0.276896	3.22	0.567901	187.261	2.05096
60013722142	f00bdbc0077bc0b563bed6ceee431dd1	SCC	0	0	no	44.7143	0	no	male	65	61	165	22.4059	1	1	0	ICI+chemotherapy	Tislelizumab	PD-1	1	0	1	0	0	0	0	0	1	0	0	0	0	0	0	0	0	0	1	0	280	139	8.53	0.81	1.91	0.223916	5.64	0.661196	146.597	2.95288
60013730667	671a74ca4e5b131c20f5c9e265d4e0d3	adenocarcinoma	0	0	no	38.5714	0	no	female	64	71	153	30.3302	0	0	0	ICI+chemotherapy	Tislelizumab	PD-1	1	1	0	0	0	0	0	0	1	0	0	0	0	0	0	0	0	0	1	0	308	156	7.19	0.03	0.83	0.115438	6.32	0.878999	371.084	7.61446
60013736063	819481628902d8e5960069ea5664c516	adenocarcinoma	0	0	no	40.1429	0	no	female	68	45	155	18.7305	0	0	0	ICI+chemotherapy	Tislelizumab	PD-1	1	0	1	0	0	0	1	0	0	0	0	0	0	0	0	0	0	0	0	0	345	113	11.4	0.93	2.12	0.185965	8.07	0.707895	162.736	3.8066
60013737751	b60a364d86ede13d8bf1fdd7d074cf7f	adenocarcinoma	0	0	no	39.8571	0	no	female	61	59	162	22.4813	0	0	0	ICI+chemotherapy+antiangiogenic_therapy	Tislelizumab	PD-1	1	1	0	0	0	0	0	1	0	0	0	0	0	1	0	0	1	0	0	0	518	116	36.26	1.39	4.73	0.130447	29.65	0.817705	109.514	6.2685
60013739655	2256d17a698f23f41aa8daed442755d5	adenocarcinoma	0	0	no	39.5714	0	no	male	60	58	167	20.7967	1	0	0	ICI+chemotherapy	Tislelizumab	PD-1	1	0	1	0	0	0	0	0	1	0	0	0	0	0	0	0	0	0	0	0	82	120	5.71	1.31	1.69	0.295972	2.37	0.415061	48.5207	1.40237
60013745294	feae57b4ad5690f0c4eff932054cb237	SCC	0	0	no	34.8571	0	no	male	59	56	167	20.0796	1	0	0	ICI+chemotherapy	Tislelizumab	PD-1	1	0	1	0	0	0	0	1	0	0	0	0	0	0	0	0	0	1	0	0	191	126	7.31	0.41	2.38	0.325581	3.88	0.53078	80.2521	1.63025
60013747779	62f2358b97c947a12cae2f431f711777	SCC	0	0	no	39.4286	0	no	male	57	61	161	23.533	1	1	0	ICI+chemotherapy	Pembrolizumab	PD-1	1	0	1	0	0	0	0	1	0	0	0	0	0	0	0	0	0	0	0	0	214	152	9.26	0.55	2.18	0.235421	6.18	0.667387	98.1651	2.83486
60013751485	3752a35de7b63b4a25f394d121de0fd4	adenocarcinoma	0	0	no	31.7143	0	no	female	70	56	161	21.6041	0	0	0	ICI+chemotherapy	Pembrolizumab	PD-1	1	1	0	0	0	0	0	1	0	0	0	0	0	0	0	0	0	0	0	0	243	128	3.25	0.19	1.03	0.316923	1.95	0.6	235.922	1.8932
60013769572	3c7553f8a1aa31255166490f99968d05	adenocarcinoma	0	0	no	43.4286	0	no	male	62	45	165	16.6758	1	0	0	ICI+chemotherapy	Tislelizumab	PD-1	1	0	1	0	0	0	0	0	1	0	0	0	0	0	0	0	0	0	0	0	382	135	5.56	0.47	2.18	0.392086	2.75	0.494604	175.229	1.26147
60013769778	91ad2a1933197b81bdb225266e96bd52	adenocarcinoma	0	0	no	33.4286	0	no	male	68	75	170	25.9516	0	0	0	ICI+chemotherapy	Tislelizumab	PD-1	1	0	1	0	0	0	0	1	1	0	0	0	0	0	0	0	0	0	1	0	234	150	4.73	0.47	1.4	0.295983	2.78	0.587738	167.143	1.98571
60013775488	46efa3b079f8e59b36985cbdb6d50f9b	adenocarcinoma	0	0	no	35.8571	0	no	male	55	53	158	21.2306	1	1	0	ICI+chemotherapy+antiangiogenic_therapy	Sintilimab	PD-1	1	0	0	1	0	0	0	1	0	0	0	0	0	1	0	0	1	0	0	0	368	96	6.5	0.87	1.29	0.198462	4.03	0.62	285.271	3.12403
60013776545	be09d275920c461fbd2ed9ce0587a8ed	adenocarcinoma	0	0	no	35.2857	0	no	male	53	54	166	19.5965	0	0	0	ICI+chemotherapy	Tislelizumab	PD-1	1	1	0	0	0	0	0	1	0	0	0	0	0	0	0	0	0	0	0	0	366	115	9.55	0.91	1.71	0.179058	6.86	0.718325	214.035	4.0117
60013778003	f0879798978fbdd3991937dafdb92e6f	adenocarcinoma	0	0	no	29.5714	0	no	male	72	62	168	21.9671	0	0	0	ICI+chemotherapy	Tislelizumab	PD-1	1	0	0	0	0	0	1	0	0	0	0	0	0	0	0	0	0	0	1	1	257	106	5.59	0.52	1.05	0.187835	3.73	0.667263	244.762	3.55238
60013779750	6047c3010ff88158d4a04ec13cb14282	adenocarcinoma	0	0	no	42.8571	0	no	female	55	38	161	14.6599	0	0	1	ICI+chemotherapy	Tislelizumab	PD-1	1	0	1	0	0	0	0	0	1	0	0	0	0	0	0	0	0	0	0	0	157	108	6.08	0.62	1.08	0.177632	4.05	0.666118	145.37	3.75
60013784133	a731580b7da3a9ee0b9c691348182735	SCC	0	0	no	42.2857	0	no	male	64	55	165	20.202	1	0	0	ICI+chemotherapy	Tislelizumab	PD-1	1	0	0	0	0	0	0	1	0	0	0	0	0	0	0	0	0	0	0	0	244	131	15.37	0.9	1.34	0.0871828	13.08	0.851008	182.09	9.76119
60013784422	906c1e8ad06e20ac386825815e1fcb2f	adenocarcinoma	1	1	Arrhythmia	3	1	Right Bundle Branch Block (RBBB)	male	60	60	170	20.7612	1	0	0	ICI+chemotherapy	Sintilimab	PD-1	1	1	0	0	0	0	1	0	0	0	0	0	0	0	0	0	0	0	0	0	115	120	2.83	0.32	1.66	0.586572	0.74	0.261484	69.2771	0.445783
60013798984	b59abf8cf460c33d302eb1006998dfbf	adenocarcinoma	0	0	no	42.7143	0	no	female	79	52	152	22.5069	1	0	0	ICI+chemotherapy	Tislelizumab	PD-1	1	0	1	0	0	0	0	0	0	0	0	0	0	0	0	0	0	0	0	0	173	144	5.14	0.09	1.4	0.272374	3.53	0.68677	123.571	2.52143
60013806096	17251d304f7cc92f9695f10b39f2a0c8	adenocarcinoma	0	0	no	36.1429	0	no	male	65	61	165	22.4059	1	0	0	ICI+chemotherapy	Tislelizumab	PD-1	1	1	0	0	0	0	0	0	1	0	0	0	0	0	0	0	0	0	0	0	256	119	7.53	0.56	2.09	0.277556	4.41	0.585657	122.488	2.11005
60013806924	0b2c89918c8936e48aea862a8f141245	SCC	0	0	no	38.5714	0	no	male	57	84	170	29.0657	1	0	0	ICI+chemotherapy	Pembrolizumab	PD-1	1	1	0	0	0	0	1	0	0	0	0	0	0	0	0	0	0	0	1	0	201	151	5.01	0.36	1.05	0.209581	3.5	0.698603	191.429	3.33333
60013815807	015dd73eee20303e1776598faabf31f4	adenocarcinoma	0	0	no	33	0	no	male	60	60	164	22.3081	1	0	0	ICI+chemotherapy	Tislelizumab	PD-1	1	0	1	0	0	0	0	0	1	0	0	0	0	0	0	0	0	0	0	0	262	131	6.31	0.59	1.13	0.179081	4.31	0.683043	231.858	3.81416
60013825839	2dff47689d2efff9d26e73eb0181ff60	adenocarcinoma	0	0	no	36.7143	0	no	male	56	55	163	20.7008	1	1	0	ICI+chemotherapy	Tislelizumab	PD-1	1	0	0	0	1	0	0	1	0	0	0	0	0	0	0	0	0	0	0	0	204	132	4.08	0.35	0.86	0.210784	2.71	0.664216	237.209	3.15116
60013839724	5b444079b2d00fa6364120e62252b645	SCLC	0	0	no	37	0	no	male	56	67	171	22.913	1	0	0	ICI+chemotherapy	Durvalumab	PD-L1	1	0	0	0	1	0	1	0	0	0	0	0	0	0	0	0	0	0	0	0	267	127	5.71	0.34	0.91	0.15937	4.36	0.763573	293.407	4.79121
60013848213	83aad0870b0721769046a842a751e7b4	adenocarcinoma	0	0	no	36	0	no	male	47	80	178	25.2493	0	0	0	ICI+chemotherapy	Pembrolizumab	PD-1	1	0	1	0	0	0	0	0	1	0	0	0	0	0	0	0	0	0	1	0	321	149	8.21	0.56	1.56	0.190012	5.97	0.727162	205.769	3.82692
60013849588	76f449fc9c0d17bdd2f922b028ee66fd	SCC	0	0	no	41.4286	0	no	male	66	50	164	18.5901	1	0	0	ICI+chemotherapy	Tislelizumab	PD-1	1	0	1	0	0	0	0	0	1	0	0	0	0	0	0	0	0	0	0	0	163	112	2.75	0.27	0.85	0.309091	1.54	0.56	191.765	1.81176
60013849894	682c01718d02b59750955ab9ec9f2768	SCC	0	0	no	37.2857	0	no	female	50	54	154	22.7694	0	0	0	ICI+chemotherapy	Camilizumab	PD-1	1	0	1	0	0	0	0	1	0	0	0	0	0	0	0	0	0	0	0	0	289	128	6.7	0.34	1.54	0.229851	4.71	0.702985	187.662	3.05844
60013854201	65fd6c4be33e9f884ccce28b2900774c	adenocarcinoma	0	0	no	38.1429	0	no	male	59	85	179	26.5285	0	0	0	ICI+chemotherapy	Camilizumab	PD-1	1	1	0	0	0	0	1	1	0	0	0	0	0	0	0	0	0	0	0	0	232	99	9.38	0.83	1.35	0.143923	7.09	0.755864	171.852	5.25185
60013874086	8b6d5537b96e834f56d0dde6b056f8ad	SCC	1	1	Arrhythmia	2.5	1	Atrial Premature Beat (APB)	male	57	60	170	20.7612	1	0	0	ICI+chemotherapy	Tislelizumab	PD-1	1	0	0	0	0	0	0	1	0	0	0	0	0	0	0	0	0	0	0	0	264	149	8.31	0.75	1.93	0.23225	5.57	0.670277	136.788	2.88601
60013877712	27f5121426b554a9824cc4c7858a2fe5	SCC	0	0	no	39.8571	0	no	male	57	50	166	18.1449	1	0	0	ICI+chemotherapy	Tislelizumab	PD-1	1	0	0	1	0	0	0	1	0	0	0	0	0	0	0	0	0	0	0	0	323	124	2.46	0.03	1.18	0.479675	1.07	0.434959	273.729	0.90678
60013881080	6056bd75bc3733fd91053b534b401365	SCLC	0	0	no	36.5714	0	no	male	60	51	161	19.6752	1	1	0	ICI+chemotherapy	Durvalumab	PD-L1	1	0	0	0	1	0	0	1	0	0	0	0	0	0	0	0	0	0	0	0	515	117	7.74	1.17	1.16	0.149871	5.31	0.686047	443.966	4.57759
60013881954	791bf6d3a5ac5d7de52105dc337fb3b6	SCC	0	0	no	40.7143	0	no	male	55	86	170	29.7578	0	0	0	ICI+chemotherapy	Pembrolizumab	PD-1	1	0	1	0	0	0	1	0	0	0	0	0	0	0	0	0	0	0	0	0	213	155	8.21	0.81	2.16	0.263094	5.01	0.610231	98.6111	2.31944
60013890466	941a0432b9344b46a50ec829c32720b1	SCLC	0	0	no	40.4286	0	no	male	72	60	172	20.2812	1	1	0	ICI+chemotherapy	Durvalumab	PD-L1	1	0	0	0	1	0	1	0	0	0	0	0	0	0	0	0	0	0	0	0	253	145	4.97	0.36	1.44	0.289738	3	0.603622	175.694	2.08333
60013898479	084e66a01384875a46f938f70fcd0f88	SCC	0	0	no	39.7143	0	no	male	63	62	172	20.9573	1	1	0	ICI+chemotherapy	Tislelizumab	PD-1	1	0	1	0	0	0	0	0	1	0	0	0	0	0	0	0	0	0	0	0	435	126	7.06	0.45	2.02	0.286119	4.45	0.630312	215.347	2.20297
60013901076	65d505fdb74bca6df9b63256a290df47	adenocarcinoma	0	0	no	39.7143	0	no	male	72	67	176	21.6296	0	0	0	ICI+chemotherapy	Tislelizumab	PD-1	1	1	0	0	0	0	0	0	0	0	0	0	0	0	0	0	0	0	0	0	430	121	19.81	1.9	2.63	0.132761	12.44	0.627966	163.498	4.73004
60013912710	2ae2cbcf4d5b0027a9dd309087b5c187	adenocarcinoma	0	0	no	38.8571	0	no	male	73	65	166	23.5883	1	0	0	ICI+chemotherapy	Tislelizumab	PD-1	1	0	0	0	0	0	1	0	0	0	0	0	0	0	0	0	0	0	0	0	264	118	10.68	1.28	1.34	0.125468	7.94	0.743446	197.015	5.92537
60013923706	a8fcdc6a537cbc5f0e45143e4cd9d153	adenocarcinoma	0	0	no	36.2857	0	no	male	60	67	166	24.3141	0	0	0	ICI+chemotherapy	Tislelizumab	PD-1	1	0	1	0	0	0	0	0	1	0	0	0	0	0	0	0	0	1	0	0	279	126	6.22	0.38	1.73	0.278135	3.85	0.618971	161.272	2.22543
60013927886	889f48e65777ae4b9e68199e84fe603d	adenocarcinoma	0	0	no	37.8571	0	no	male	51	60	162	22.8624	1	0	0	ICI+chemotherapy	Tislelizumab	PD-1	1	0	0	0	0	0	1	0	0	0	0	0	0	0	0	0	0	0	0	0	341	110	9.36	0.73	1.62	0.173077	6.82	0.728632	210.494	4.20988
60013928508	216c7897d770299fec40fb906e2725f6	adenocarcinoma	0	0	no	31.8571	0	no	male	58	81	177	25.8546	1	0	0	ICI+chemotherapy	Sintilimab	PD-1	1	1	0	0	0	0	0	1	0	0	0	0	0	0	0	0	0	0	0	0	306	142	12.35	0.85	1.98	0.160324	9.45	0.765182	154.545	4.77273
60013943411	0964ec87420fc869435cb6a57f319360	adenocarcinoma	0	0	no	33.5714	0	no	male	54	80	172	26.8726	1	0	0	ICI+chemotherapy	Tislelizumab	PD-1	1	0	1	0	0	0	0	1	0	0	0	0	0	0	0	0	0	0	0	0	213	144	5.79	0.44	0.87	0.150259	4.26	0.735751	244.828	4.89655
60013947799	d6cbc3ba468b48ce66686508c59ba832	adenocarcinoma	0	0	no	37.2857	0	no	male	58	83	170	28.7197	1	0	0	ICI+chemotherapy	Tislelizumab	PD-1	1	1	0	0	0	0	0	0	1	0	0	0	0	0	0	0	0	1	0	0	203	121	11.15	0.85	2.24	0.200897	7.65	0.686099	90.625	3.41518
60013967395	b1ec9406c004b2ee3c026e3183834ca3	adenocarcinoma	0	0	no	34.4286	0	no	male	62	63	168	22.3214	1	0	0	ICI+chemotherapy	Tislelizumab	PD-1	1	0	0	0	0	0	0	0	1	0	0	0	0	0	0	0	0	0	0	0	166	123	7.29	0.81	1.39	0.190672	4.93	0.676269	119.424	3.54676
60013979319	39b7e6041cdc5fe81cc929d88210f605	adenocarcinoma	0	0	no	33.4286	0	no	male	68	55	174	18.1662	0	0	0	ICI+chemotherapy	Sintilimab	PD-1	1	1	0	0	0	0	1	0	0	0	0	0	0	0	0	0	0	0	0	0	470	127	6.03	0.49	0.8	0.13267	4.41	0.731343	587.5	5.5125
60013981623	73a46136928c5bbddffcead35265e476	SCC	0	0	no	33	0	no	female	74	64	163	23.9	0	0	0	ICI+chemotherapy	Tislelizumab	PD-1	1	0	1	0	0	0	0	1	0	0	0	0	0	0	0	0	0	0	0	0	310	107	6.53	1.03	2.8	0.42879	2.59	0.396631	110.714	0.925
60013998774	2c6e6dbdcd99ec886936d3590a243892	SCC	0	0	no	37.5714	0	no	male	72	70	172	23.6614	1	1	0	ICI+chemotherapy	Tislelizumab	PD-1	1	0	1	0	0	0	0	0	1	0	0	0	0	0	0	0	0	0	0	0	258	132	7.21	0.62	0.84	0.116505	5.34	0.740638	307.143	6.35714
60013999329	48164a1e2400bbd1f45f2a83c642105b	adenocarcinoma	0	0	no	36.8571	0	no	male	59	65	160	25.3906	1	1	0	ICI+chemotherapy	Sintilimab	PD-1	1	1	0	0	0	0	0	1	0	0	0	0	0	0	0	0	0	0	0	0	100	143	18.83	1.91	2.9	0.15401	13.98	0.742432	34.4828	4.82069
60014002859	b0deace4af600456a64850c568d71da5	SCC	0	0	no	37.5714	0	no	female	59	61	169	21.3578	0	0	0	ICI+chemotherapy	Tislelizumab	PD-1	1	0	1	0	0	0	1	1	0	0	0	0	0	0	0	0	0	0	0	0	133	92	3.22	0.23	0.73	0.226708	2.2	0.68323	182.192	3.0137
60014004211	b37a0aae3da4d8b0654dde93b83b8af5	adenocarcinoma	0	0	no	33.1429	0	no	male	64	52	160	20.3125	1	0	0	ICI+chemotherapy+antiangiogenic_therapy	Sintilimab	PD-1	1	1	0	0	0	0	0	0	1	0	0	0	0	1	1	0	0	0	0	0	260	130	6.45	0.98	1.65	0.255814	3.61	0.55969	157.576	2.18788
60014008498	3aca5416c5e5a0e58565b9189071bed5	SCC	0	0	no	36.8571	0	no	male	63	66	168	23.2072	1	0	0	ICI+chemotherapy	Tislelizumab	PD-1	1	0	1	0	0	0	0	1	0	0	0	0	0	0	0	0	0	0	0	0	357	133	6.59	0.7	0.67	0.101669	4.93	0.748103	532.836	7.35821
60014012572	2535c7e3ed53344ff096bad4b7f10818	adenocarcinoma	0	0	no	35.5714	0	no	female	49	62	164	23.0518	0	0	0	ICI+chemotherapy	Tislelizumab	PD-1	1	1	0	0	0	0	1	1	0	0	0	0	0	0	0	0	0	0	0	0	214	123	9.48	0.85	1	0.105485	6.71	0.707806	214	6.71
60014017294	a8397847d15809b99428e15843ec20ec	NET	0	0	no	29.7143	0	no	male	68	59	170	20.346	0	1	0	ICI+chemotherapy	Durvalumab	PD-L1	1	0	0	0	1	0	0	0	1	0	0	0	0	0	0	0	0	0	0	0	191	137	6.83	0.75	1.26	0.18448	4.72	0.691069	151.587	3.74603
60014020865	13d253cfe9bebe64e9480328246763c3	adenocarcinoma	0	0	no	31.8571	0	no	male	63	56	170	19.2388	1	0	0	ICI+chemotherapy+antiangiogenic_therapy	Tislelizumab	PD-1	1	1	0	0	0	0	0	0	0	0	0	0	0	1	1	0	0	0	0	0	475	122	6.86	0.63	1.2	0.174927	4.95	0.721574	395.833	4.125
60014026450	adf405fdf8a40c8ac28af71f26af15c1	SCC	0	0	no	31.4286	0	no	male	68	62	172	20.9573	0	0	0	ICI+chemotherapy	Tislelizumab	PD-1	1	1	0	0	0	0	1	0	0	0	0	0	0	0	0	0	0	1	0	0	367	97	11.63	0.89	0.92	0.0791058	9.47	0.814273	398.913	10.2935
60014040542	ae871e0cc16902151b492db9cbf3aaa4	adenocarcinoma	0	0	no	35.4286	0	no	male	69	64	172	21.6333	1	0	0	ICI+chemotherapy	Tislelizumab	PD-1	1	1	0	0	0	0	0	0	1	0	0	0	0	0	0	0	0	1	0	0	271	140	8.19	0.41	2.15	0.262515	5.24	0.639805	126.047	2.43721
60014042698	27354a755c845410266ae29564c4fa88	adenocarcinoma	0	0	no	31.2857	0	no	male	61	62	155	25.8065	1	0	0	ICI+chemotherapy	Tislelizumab	PD-1	1	1	0	0	0	0	0	0	1	0	0	0	0	0	0	0	0	0	0	0	351	133	7.66	0.78	1.7	0.221932	4.98	0.650131	206.471	2.92941
60014046501	ebc2171c78bde9c4cb73786a63bd6d9c	adenocarcinoma	0	0	no	35.7143	0	no	male	69	54	169	18.9069	0	0	0	ICI+chemotherapy	Tislelizumab	PD-1	1	1	0	0	0	0	0	0	1	0	0	0	0	0	0	0	0	0	0	0	298	124	5.63	0.49	1.45	0.257549	3.64	0.646536	205.517	2.51034
60014048667	2936314bcae39cf7bc8b7151e5cc61c1	adenocarcinoma	0	0	no	36.4286	0	no	male	74	70	171	23.939	1	0	0	ICI+chemotherapy	Pembrolizumab	PD-1	1	1	0	0	0	0	1	0	0	0	0	0	0	0	0	0	0	1	1	0	181	125	6.51	0.57	1.16	0.178187	2.99	0.459293	156.034	2.57759
60014053260	ba4fba6e2b1aa51aafbfe58396964cc8	adenocarcinoma	0	0	no	32	0	no	male	66	68	175	22.0408	1	0	0	ICI+chemotherapy	Tislelizumab	PD-1	1	1	0	0	0	0	0	1	0	0	0	0	0	0	0	0	0	1	1	0	223	133	8.5	0.67	1.53	0.18	5.91	0.695294	145.752	3.86275
60014055804	c0ccb4b77742a617d8496ed30ca7708c	SCC	0	0	no	31.8571	0	no	male	61	75	175	24.4898	0	0	0	ICI+chemotherapy	Tislelizumab	PD-1	1	0	1	0	0	0	0	1	0	0	0	0	0	0	0	0	0	1	0	0	215	142	9.92	0.84	2.31	0.232863	6.65	0.670363	93.0736	2.87879
60014071541	4ccb5f449d464de07045540ad1519038	SCC	0	0	no	35.4286	0	no	female	65	56	160	21.6797	0	0	0	ICI+chemotherapy	Tislelizumab	PD-1	1	0	1	0	0	0	0	1	0	0	0	0	0	0	0	0	0	0	1	0	260	112	5.66	0.55	1.16	0.204947	3.74	0.660777	224.138	3.22414
60014075478	2a0e0d81991522f39bc1b9eaaae51a06	SCC	0	0	no	29.7143	0	no	male	61	64	161	24.6904	1	1	0	ICI+chemotherapy	Tislelizumab	PD-1	1	0	1	0	0	0	0	0	1	0	0	0	0	0	0	0	0	1	0	0	249	120	7.19	0.73	1.68	0.233658	4.63	0.64395	148.214	2.75595
60014076632	ce600c5d8f4b3dd09961c94768ec70a3	adenocarcinoma	0	0	no	31.7143	0	no	male	57	68	172	22.9854	1	0	0	ICI+chemotherapy	Sintilimab	PD-1	1	1	0	0	0	0	0	0	1	0	0	0	0	0	0	0	0	0	0	0	213	127	11.29	0.13	0.62	0.0549159	10.53	0.932684	343.548	16.9839
60014078193	181ff4d89f4e05917c226dabb937ac53	SCC	0	0	no	31.4286	0	no	male	64	63	165	23.1405	0	0	0	ICI+chemotherapy	Tislelizumab	PD-1	1	0	0	0	0	0	0	1	0	0	0	0	0	0	0	0	0	0	0	0	238	97	7.13	0.66	1.21	0.169705	4.95	0.69425	196.694	4.09091
60014089093	6097eae1c5dd4b7018608d0686ca9914	SCC	0	0	no	31.4286	0	no	male	72	63	165	22.9568	1	0	0	ICI+chemotherapy	Pembrolizumab	PD-1	1	0	1	0	0	0	1	0	0	0	0	0	0	0	0	0	0	0	0	0	327	104	6.88	0.64	1.38	0.200581	4.71	0.684593	236.957	3.41304
60014092635	832dbae87aaf700bc561f737c2cfb130	adenocarcinoma	0	0	no	31.5714	0	no	male	64	59	163	22.2063	1	1	0	ICI+chemotherapy	Tislelizumab	PD-1	1	0	1	0	0	0	1	0	0	0	0	0	0	0	0	0	0	0	0	0	137	110	18.27	0.97	1.03	0.0563766	15.9	0.870279	133.01	15.4369
60014100565	ac93f9fbdece05c758e611ce62c95ab4	adenocarcinoma	0	0	no	34.7143	0	no	male	75	58	167	20.7967	1	1	0	ICI+chemotherapy	Tislelizumab	PD-1	1	0	0	0	0	0	0	1	0	0	0	0	0	0	0	0	0	0	0	0	290	140	7.72	0.02	1.29	0.167098	6.4	0.829016	224.806	4.96124
60014102847	23840e90f77d2993320a8a601660560b	adenocarcinoma	0	0	no	29.2857	0	no	female	36	64	162	24.3865	0	0	0	ICI+chemotherapy	Pembrolizumab	PD-1	1	1	0	0	0	0	0	1	0	0	0	0	0	0	0	0	0	0	0	0	236	103	4.37	0.3	1.26	0.28833	2.48	0.567506	187.302	1.96825
60014107879	75166b8b1308b8d311be66fa939a4cf6	adenocarcinoma	0	0	no	35	0	no	female	61	50	161	19.2894	0	0	0	ICI+chemotherapy	Camilizumab	PD-1	1	0	0	0	0	0	0	1	0	0	0	0	0	0	0	0	0	0	0	0	321	132	4.82	0.41	1	0.207469	3.33	0.690871	321	3.33
60014110835	0ee615ea0c635695496f32e95a9c7f3a	adenocarcinoma	0	0	no	34.2857	0	no	male	63	66	157	26.7759	1	1	0	ICI+chemotherapy	Tislelizumab	PD-1	1	0	1	0	0	0	0	1	0	0	0	0	0	0	0	0	0	0	0	0	307	136	5.5	0.48	1.43	0.26	3.5	0.636364	214.685	2.44755
60014151916	70fff10e19f24d6b880c05d79ae79ef9	SCC	0	0	no	29.5714	0	no	male	60	59	155	24.5578	1	1	0	ICI+chemotherapy	Toripalimab	PD-1	1	0	1	0	0	0	0	1	0	0	0	0	0	0	0	0	0	0	0	0	198	149	7.93	0.81	2.33	0.293821	4.21	0.530895	84.9785	1.80687
60014152958	b1722cc3242c8048a27c2756cfd8e3e5	SCC	0	0	no	33.7143	0	no	male	57	55	176	17.7557	0	0	0	ICI+chemotherapy	Camilizumab	PD-1	1	0	0	1	0	0	0	1	0	0	0	0	0	0	0	0	0	0	0	0	387	134	6.76	0.62	1.63	0.241124	4.32	0.639053	237.423	2.65031
60014154296	3835310771de29fbfcab32b61ecc8290	adenocarcinoma	0	0	no	30.2857	0	no	male	57	51	164	18.9619	1	0	0	ICI+chemotherapy	Sintilimab	PD-1	1	1	0	0	0	0	0	0	1	0	0	0	0	0	0	0	0	0	0	0	151	126	13.86	1.32	2.5	0.180375	8.74	0.630592	60.4	3.496
60014155016	fc395d9b27b3ed220e2ba122a62ecd40	SCLC	0	0	no	32.5714	0	no	male	74	72	176	23.2438	1	0	0	ICI+chemotherapy	Atezolizumab	PD-L1	1	0	0	0	1	0	0	1	0	0	0	0	0	0	0	0	0	1	1	0	211	126	6.61	0.47	1.59	0.240545	4.45	0.673222	132.704	2.79874
60014165573	fa5ef8c173a7bf918bde41c3c244527c	adenocarcinoma	0	0	no	29.1429	0	no	male	64	72	169	25.2092	1	1	0	ICI+chemotherapy	Toripalimab	PD-1	1	0	1	0	0	0	0	1	0	0	0	0	0	0	0	0	0	0	0	0	333	131	8.67	0.79	1.23	0.141869	6.46	0.745098	270.732	5.25203
60014184466	a46c495a18606d1edfde0ddf3b765432	adenocarcinoma	0	0	no	28	0	no	male	70	62	180	19.1358	1	0	0	ICI+chemotherapy	Tislelizumab	PD-1	1	0	1	0	0	0	1	1	0	0	0	0	0	0	0	0	0	0	0	0	360	106	7.62	0.43	1.27	0.166667	5.69	0.746719	283.465	4.48031
60014192407	2ea0289d5f907c9eb3167c239dc13204	adenocarcinoma	0	0	no	32.4286	0	no	male	77	55	167	19.721	1	0	0	ICI+chemotherapy	Durvalumab	PD-L1	1	0	0	0	1	0	1	0	0	0	0	0	0	0	0	0	0	0	0	0	259	145	7.81	0.65	2.07	0.265045	4.91	0.628681	125.121	2.37198
60014199369	064b8f8a047f1f6efac4446a3524556f	adenocarcinoma	0	0	no	32.7143	0	no	male	65	50	166	18.1449	0	0	0	ICI+chemotherapy	Tislelizumab	PD-1	1	1	0	0	0	0	0	1	0	0	0	0	0	0	0	0	0	0	0	0	472	123	9.78	0.67	1.61	0.164622	6.64	0.678937	293.168	4.12422
[truncated: 12 more rows]
[truncated: 12 more columns]
